# Supplementary material for: Structural basis of terephthalate recognition by solute binding protein TphC
Source: Research Square preprint supplement (doi:10.21203/rs.3.rs-358367/v1), 2021-04-09
Supplement: Supplementary file 1 [file 297ee522ee98b29da9132ea5.xlsx]

## Sheet: Contents
	CONTENTS
	Table S7A	Taxonomic information of the TphC homologues
	Table S7B	TphC homologues sequence analysis
	Table S7C	TphC homologues sequence analysis for SBP belonging to tph-like operons
	Table S7D	Genomic context analysis – sequences flanking (+/-7000 nts) the TphC homolog
	Table S7E	Percent Identity Matrix of proteins belonging to tph-like operons

## Sheet: A_Taxonomy
Accession	Scientific Name	Taxid	Selected Species	Taxid	Genus		Family		Order		Class		Phylum		Kingdom		Domain		Family		Order		Class
WP_175213716.1	Achromobacter aegrifaciens	1287736	Achromobacter aegrifaciens	1287736	Achromobacter	506	Alcaligenaceae	80840	Burkholderiales	28216	Betaproteobacteria	1224	Proteobacteria	2	Bacteria	131567	cellular organisms		Comamonadaceae	40	Burkholderiales	81	Betaproteobacteria	81
WP_175138404.1	Achromobacter animicus	1389935	Achromobacter animicus	1389935	Achromobacter	506	Alcaligenaceae	80840	Burkholderiales	28216	Betaproteobacteria	1224	Proteobacteria	2	Bacteria	131567	cellular organisms		Alcaligenaceae	21	Rhizobiales	13	Alphaproteobacteria	19
WP_043517852.1	Achromobacter arsenitoxydans	1147684	Achromobacter arsenitoxydans	477184	Achromobacter	506	Alcaligenaceae	80840	Burkholderiales	28216	Betaproteobacteria	1224	Proteobacteria	2	Bacteria	131567	cellular organisms		Burkholderiales genera incertae sedis	9	Rhodospirillales	6
WP_171665181.1	Achromobacter deleyi	1353891	Achromobacter deleyi	1353891	Achromobacter	506	Alcaligenaceae	80840	Burkholderiales	28216	Betaproteobacteria	1224	Proteobacteria	2	Bacteria	131567	cellular organisms		Burkholderiaceae	8
WP_175169383.1	Achromobacter kerstersii	1353890	Achromobacter kerstersii	1353890	Achromobacter	506	Alcaligenaceae	80840	Burkholderiales	28216	Betaproteobacteria	1224	Proteobacteria	2	Bacteria	131567	cellular organisms		Bradyrhizobiaceae	6
WP_180098422.1	Achromobacter mucicolens	1389922	Achromobacter mucicolens	1389922	Achromobacter	506	Alcaligenaceae	80840	Burkholderiales	28216	Betaproteobacteria	1224	Proteobacteria	2	Bacteria	131567	cellular organisms		Acetobacteraceae	4
WP_175174331.1	Achromobacter pestifer	1353889	Achromobacter pestifer	1353889	Achromobacter	506	Alcaligenaceae	80840	Burkholderiales	28216	Betaproteobacteria	1224	Proteobacteria	2	Bacteria	131567	cellular organisms		Oxalobacteraceae	3
WP_175128990.1	Achromobacter piechaudii	72556	Achromobacter piechaudii	72556	Achromobacter	506	Alcaligenaceae	80840	Burkholderiales	28216	Betaproteobacteria	1224	Proteobacteria	2	Bacteria	131567	cellular organisms		Rhodospirillales incertae sedis	2
WP_175129530.1	Achromobacter piechaudii	72556	Achromobacter piechaudii	72556	Achromobacter	506	Alcaligenaceae	80840	Burkholderiales	28216	Betaproteobacteria	1224	Proteobacteria	2	Bacteria	131567	cellular organisms		Xanthobacteraceae	2
WP_105241586.1	Achromobacter spanius	217203	Achromobacter spanius	217203	Achromobacter	506	Alcaligenaceae	80840	Burkholderiales	28216	Betaproteobacteria	1224	Proteobacteria	2	Bacteria	131567	cellular organisms		Methylobacteriaceae	2
WP_119555032.1	Acidovorax cavernicola	1675792	Acidovorax cavernicola	1675792	Acidovorax	80864	Comamonadaceae	80840	Burkholderiales	28216	Betaproteobacteria	1224	Proteobacteria	2	Bacteria	131567	cellular organisms		Hyphomicrobiaceae	2
WP_092952237.1	Acidovorax konjaci	32040	Acidovorax konjaci	32040	Acidovorax	80864	Comamonadaceae	80840	Burkholderiales	28216	Betaproteobacteria	1224	Proteobacteria	2	Bacteria	131567	cellular organisms		Rhizobiales incertae sedis	1
WP_092696893.1	Acidovorax soli	592050	Acidovorax soli	592050	Acidovorax	80864	Comamonadaceae	80840	Burkholderiales	28216	Betaproteobacteria	1224	Proteobacteria	2	Bacteria	131567	cellular organisms
WP_024005372.1	Advenella kashmirensis	310575	Advenella kashmirensis	1424334	Advenella	506	Alcaligenaceae	80840	Burkholderiales	28216	Betaproteobacteria	1224	Proteobacteria	2	Bacteria	131567	cellular organisms
WP_152544232.1	Afipia	1033	Afipia sp.	1320553	Afipia	41294	Bradyrhizobiaceae	356	Rhizobiales	28211	Alphaproteobacteria	1224	Proteobacteria	2	Bacteria	131567	cellular organisms
WP_013520309.1	Alicycliphilus	201096	Alicycliphilus denitrificans	179636	Alicycliphilus	80864	Comamonadaceae	80840	Burkholderiales	28216	Betaproteobacteria	1224	Proteobacteria	2	Bacteria	131567	cellular organisms
WP_103018016.1	Alicycliphilus denitrificans	179636	Alicycliphilus denitrificans	179636	Alicycliphilus	80864	Comamonadaceae	80840	Burkholderiales	28216	Betaproteobacteria	1224	Proteobacteria	2	Bacteria	131567	cellular organisms
WP_127090157.1	Aquabacter cavernae	2496029	Aquabacter cavernae	2496029	Aquabacter	45401	Hyphomicrobiaceae	356	Rhizobiales	28211	Alphaproteobacteria	1224	Proteobacteria	2	Bacteria	131567	cellular organisms
WP_137734894.1	Aquabacterium pictum	2315236	Aquabacterium pictum	2315236	Aquabacterium	224471	Burkholderiales genera incertae sedis	80840	Burkholderiales	28216	Betaproteobacteria	1224	Proteobacteria	2	Bacteria	131567	cellular organisms
WP_119157698.1	Aquabacterium tepidiphilum	2315841	Aquabacterium tepidiphilum	2315841	Aquabacterium	224471	Burkholderiales genera incertae sedis	80840	Burkholderiales	28216	Betaproteobacteria	1224	Proteobacteria	2	Bacteria	131567	cellular organisms
WP_046112872.1	Aquincola tertiaricarbonis	391953	Aquincola tertiaricarbonis	391953	Aquincola	224471	Burkholderiales genera incertae sedis	80840	Burkholderiales	28216	Betaproteobacteria	1224	Proteobacteria	2	Bacteria	131567	cellular organisms
WP_003814318.1	Bordetella	517	Bordetella parapertussis	519	Bordetella	506	Alcaligenaceae	80840	Burkholderiales	28216	Betaproteobacteria	1224	Proteobacteria	2	Bacteria	131567	cellular organisms
WP_010929711.1	Bordetella pertussis	520	Bordetella pertussis	520	Bordetella	506	Alcaligenaceae	80840	Burkholderiales	28216	Betaproteobacteria	1224	Proteobacteria	2	Bacteria	131567	cellular organisms
WP_108512349.1	Bradyrhizobium algeriense	634784	Bradyrhizobium algeriense	634784	Bradyrhizobium	41294	Bradyrhizobiaceae	356	Rhizobiales	28211	Alphaproteobacteria	1224	Proteobacteria	2	Bacteria	131567	cellular organisms
WP_139859134.1	Bradyrhizobium ivorense	2511166	Bradyrhizobium ivorense	2511166	Bradyrhizobium	41294	Bradyrhizobiaceae	356	Rhizobiales	28211	Alphaproteobacteria	1224	Proteobacteria	2	Bacteria	131567	cellular organisms
WP_146984371.1	Bradyrhizobium macuxiense	1755647	Bradyrhizobium macuxiense	1755647	Bradyrhizobium	41294	Bradyrhizobiaceae	356	Rhizobiales	28211	Alphaproteobacteria	1224	Proteobacteria	2	Bacteria	131567	cellular organisms
WP_187399298.1	Bradyrhizobium paxllaeri	190148	Bradyrhizobium paxllaeri	190148	Bradyrhizobium	41294	Bradyrhizobiaceae	356	Rhizobiales	28211	Alphaproteobacteria	1224	Proteobacteria	2	Bacteria	131567	cellular organisms
WP_057845088.1	Bradyrhizobium retamae	1300035	Bradyrhizobium retamae	1300035	Bradyrhizobium	41294	Bradyrhizobiaceae	356	Rhizobiales	28211	Alphaproteobacteria	1224	Proteobacteria	2	Bacteria	131567	cellular organisms
WP_153586175.1	Caenimonas koreensis	367474	Caenimonas koreensis	1121255	Caenimonas	80864	Comamonadaceae	80840	Burkholderiales	28216	Betaproteobacteria	1224	Proteobacteria	2	Bacteria	131567	cellular organisms
WP_019560447.1	Caldimonas	196013	Caldimonas taiwanensis	1349753	Caldimonas	80864	Comamonadaceae	80840	Burkholderiales	28216	Betaproteobacteria	1224	Proteobacteria	2	Bacteria	131567	cellular organisms
WP_088603386.1	Candidimonas nitroreducens	683354	Candidimonas nitroreducens	683354	Candidimonas	506	Alcaligenaceae	80840	Burkholderiales	28216	Betaproteobacteria	1224	Proteobacteria	2	Bacteria	131567	cellular organisms
WP_027017063.1	Comamonas composti	408558	Comamonas composti	1121349	Comamonas	80864	Comamonadaceae	80840	Burkholderiales	28216	Betaproteobacteria	1224	Proteobacteria	2	Bacteria	131567	cellular organisms
WP_027017069.1	Comamonas composti	408558	Comamonas composti	1121349	Comamonas	80864	Comamonadaceae	80840	Burkholderiales	28216	Betaproteobacteria	1224	Proteobacteria	2	Bacteria	131567	cellular organisms
WP_054067327.1	Comamonas kerstersii	225992	Comamonas kerstersii	225992	Comamonas	80864	Comamonadaceae	80840	Burkholderiales	28216	Betaproteobacteria	1224	Proteobacteria	2	Bacteria	131567	cellular organisms
WP_087281897.1	Comamonas serinivorans	1082851	Comamonas serinivorans	1082851	Comamonas	80864	Comamonadaceae	80840	Burkholderiales	28216	Betaproteobacteria	1224	Proteobacteria	2	Bacteria	131567	cellular organisms
WP_012837657.1	Comamonas thiooxydans	363952	Comamonas thiooxydans	363952	Comamonas	80864	Comamonadaceae	80840	Burkholderiales	28216	Betaproteobacteria	1224	Proteobacteria	2	Bacteria	131567	cellular organisms
WP_111519084.1	Cupriavidus	106589	Cupriavidus alkaliphilus	942866	Cupriavidus	119060	Burkholderiaceae	80840	Burkholderiales	28216	Betaproteobacteria	1224	Proteobacteria	2	Bacteria	131567	cellular organisms
WP_111520876.1	Cupriavidus	106589	Cupriavidus alkaliphilus	942866	Cupriavidus	119060	Burkholderiaceae	80840	Burkholderiales	28216	Betaproteobacteria	1224	Proteobacteria	2	Bacteria	131567	cellular organisms
WP_043352773.1	Cupriavidus basilensis	68895	Cupriavidus basilensis	68895	Cupriavidus	119060	Burkholderiaceae	80840	Burkholderiales	28216	Betaproteobacteria	1224	Proteobacteria	2	Bacteria	131567	cellular organisms
WP_062801824.1	Cupriavidus nantongensis	1796606	Cupriavidus nantongensis	1796606	Cupriavidus	119060	Burkholderiaceae	80840	Burkholderiales	28216	Betaproteobacteria	1224	Proteobacteria	2	Bacteria	131567	cellular organisms
WP_062804022.1	Cupriavidus nantongensis	1796606	Cupriavidus nantongensis	1796606	Cupriavidus	119060	Burkholderiaceae	80840	Burkholderiales	28216	Betaproteobacteria	1224	Proteobacteria	2	Bacteria	131567	cellular organisms
WP_018006032.1	Cupriavidus	106589	Cupriavidus neocaledonicus	1040979	Cupriavidus	119060	Burkholderiaceae	80840	Burkholderiales	28216	Betaproteobacteria	1224	Proteobacteria	2	Bacteria	131567	cellular organisms
WP_018006224.1	Cupriavidus	106589	Cupriavidus neocaledonicus	1040979	Cupriavidus	119060	Burkholderiaceae	80840	Burkholderiales	28216	Betaproteobacteria	1224	Proteobacteria	2	Bacteria	131567	cellular organisms
WP_066705791.1	Curvibacter delicatus	80879	Curvibacter delicatus	1349763	Curvibacter	80864	Comamonadaceae	80840	Burkholderiales	28216	Betaproteobacteria	1224	Proteobacteria	2	Bacteria	131567	cellular organisms
WP_066708114.1	Curvibacter delicatus	80879	Curvibacter delicatus	1349763	Curvibacter	80864	Comamonadaceae	80840	Burkholderiales	28216	Betaproteobacteria	1224	Proteobacteria	2	Bacteria	131567	cellular organisms
WP_027478907.1	Curvibacter gracilis	230310	Curvibacter gracilis	1336244	Curvibacter	80864	Comamonadaceae	80840	Burkholderiales	28216	Betaproteobacteria	1224	Proteobacteria	2	Bacteria	131567	cellular organisms
WP_051443420.1	Curvibacter gracilis	230310	Curvibacter gracilis	1336244	Curvibacter	80864	Comamonadaceae	80840	Burkholderiales	28216	Betaproteobacteria	1224	Proteobacteria	2	Bacteria	131567	cellular organisms
WP_019573105.1	Curvibacter lanceolatus	86182	Curvibacter lanceolatus	1265504	Curvibacter	80864	Comamonadaceae	80840	Burkholderiales	28216	Betaproteobacteria	1224	Proteobacteria	2	Bacteria	131567	cellular organisms
WP_019577253.1	Curvibacter lanceolatus	86182	Curvibacter lanceolatus	1265504	Curvibacter	80864	Comamonadaceae	80840	Burkholderiales	28216	Betaproteobacteria	1224	Proteobacteria	2	Bacteria	131567	cellular organisms
WP_015914171.1	Comamonadaceae	80864	Diaphorobacter nitroreducens	164759	Comamonadaceae	80864	Comamonadaceae	80840	Burkholderiales	28216	Betaproteobacteria	1224	Proteobacteria	2	Bacteria	131567	cellular organisms
WP_123674889.1	Diaphorobacter nitroreducens	164759	Diaphorobacter nitroreducens	164759	Diaphorobacter	80864	Comamonadaceae	80840	Burkholderiales	28216	Betaproteobacteria	1224	Proteobacteria	2	Bacteria	131567	cellular organisms
WP_012655492.1	Comamonadaceae	80864	Diaphorobacter polyhydroxybutyrativorans	1546149	Comamonadaceae	80864	Comamonadaceae	80840	Burkholderiales	28216	Betaproteobacteria	1224	Proteobacteria	2	Bacteria	131567	cellular organisms
WP_088888403.1	Diaphorobacter polyhydroxybutyrativorans	1546149	Diaphorobacter polyhydroxybutyrativorans	1546149	Diaphorobacter	80864	Comamonadaceae	80840	Burkholderiales	28216	Betaproteobacteria	1224	Proteobacteria	2	Bacteria	131567	cellular organisms
WP_170920738.1	Enhydrobacter aerosaccus	225324	Enhydrobacter aerosaccus	225324	Enhydrobacter	451274	Rhodospirillales incertae sedis	204441	Rhodospirillales	28211	Alphaproteobacteria	1224	Proteobacteria	2	Bacteria	131567	cellular organisms
WP_124540981.1	Geomonas soli	2496871	Geomonas soli	2496871	Geomonas	80864	Comamonadaceae	80840	Burkholderiales	28216	Betaproteobacteria	1224	Proteobacteria	2	Bacteria	131567	cellular organisms
WP_116960468.1	Hydrogenophaga borbori	2294117	Hydrogenophaga borbori	2294117	Hydrogenophaga	80864	Comamonadaceae	80840	Burkholderiales	28216	Betaproteobacteria	1224	Proteobacteria	2	Bacteria	131567	cellular organisms
WP_009515009.1	Hydrogenophaga	47420	Hydrogenophaga intermedia	65786	Hydrogenophaga	80864	Comamonadaceae	80840	Burkholderiales	28216	Betaproteobacteria	1224	Proteobacteria	2	Bacteria	131567	cellular organisms
WP_054022746.1	Ideonella sakaiensis	1547922	Ideonella sakaiensis	1547922	Ideonella	224471	Burkholderiales genera incertae sedis	80840	Burkholderiales	28216	Betaproteobacteria	1224	Proteobacteria	2	Bacteria	131567	cellular organisms
WP_136572427.1	Lampropedia puyangensis	1330072	Lampropedia puyangensis	1330072	Lampropedia	80864	Comamonadaceae	80840	Burkholderiales	28216	Betaproteobacteria	1224	Proteobacteria	2	Bacteria	131567	cellular organisms
WP_108401532.1	Limnohabitans curvus	323423	Limnohabitans curvus	323423	Limnohabitans	80864	Comamonadaceae	80840	Burkholderiales	28216	Betaproteobacteria	1224	Proteobacteria	2	Bacteria	131567	cellular organisms
WP_105748278.1	Malikia granosa	263067	Malikia granosa	263067	Malikia	80864	Comamonadaceae	80840	Burkholderiales	28216	Betaproteobacteria	1224	Proteobacteria	2	Bacteria	131567	cellular organisms
WP_020652673.1	Massilia niastensis	544911	Massilia niastensis	1122215	Massilia	75682	Oxalobacteraceae	80840	Burkholderiales	28216	Betaproteobacteria	1224	Proteobacteria	2	Bacteria	131567	cellular organisms
WP_114186742.1	Microvirga aerophila	670291	Microvirga aerophila	670291	Microvirga	119045	Methylobacteriaceae	356	Rhizobiales	28211	Alphaproteobacteria	1224	Proteobacteria	2	Bacteria	131567	cellular organisms
WP_114768374.1	Microvirga	186650	Microvirga sp.	2740529	Microvirga	119045	Methylobacteriaceae	356	Rhizobiales	28211	Alphaproteobacteria	1224	Proteobacteria	2	Bacteria	131567	cellular organisms
WP_089401330.1	Noviherbaspirillum humi	1688639	Noviherbaspirillum humi	1688639	Noviherbaspirillum	75682	Oxalobacteraceae	80840	Burkholderiales	28216	Betaproteobacteria	1224	Proteobacteria	2	Bacteria	131567	cellular organisms
WP_019139588.1	Noviherbaspirillum massiliense	1465823	Noviherbaspirillum massiliense	1095769	Noviherbaspirillum	75682	Oxalobacteraceae	80840	Burkholderiales	28216	Betaproteobacteria	1224	Proteobacteria	2	Bacteria	131567	cellular organisms
WP_148813679.1	Pigmentiphaga aceris	1940612	Pigmentiphaga aceris	1940612	Pigmentiphaga	506	Alcaligenaceae	80840	Burkholderiales	28216	Betaproteobacteria	1224	Proteobacteria	2	Bacteria	131567	cellular organisms
WP_130358578.1	Pigmentiphaga kullae	151784	Pigmentiphaga kullae	151784	Pigmentiphaga	506	Alcaligenaceae	80840	Burkholderiales	28216	Betaproteobacteria	1224	Proteobacteria	2	Bacteria	131567	cellular organisms
WP_130358990.1	Pigmentiphaga kullae	151784	Pigmentiphaga kullae	151784	Pigmentiphaga	506	Alcaligenaceae	80840	Burkholderiales	28216	Betaproteobacteria	1224	Proteobacteria	2	Bacteria	131567	cellular organisms
WP_179582675.1	Pigmentiphaga litoralis	516702	Pigmentiphaga litoralis	516702	Pigmentiphaga	506	Alcaligenaceae	80840	Burkholderiales	28216	Betaproteobacteria	1224	Proteobacteria	2	Bacteria	131567	cellular organisms
WP_179586306.1	Pigmentiphaga litoralis	516702	Pigmentiphaga litoralis	516702	Pigmentiphaga	506	Alcaligenaceae	80840	Burkholderiales	28216	Betaproteobacteria	1224	Proteobacteria	2	Bacteria	131567	cellular organisms
WP_128003434.1	Piscinibacter defluvii	1796922	Piscinibacter defluvii	1796922	Piscinibacter	224471	Burkholderiales genera incertae sedis	80840	Burkholderiales	28216	Betaproteobacteria	1224	Proteobacteria	2	Bacteria	131567	cellular organisms
WP_108646212.1	Polynucleobacter rarus	556055	Polynucleobacter rarus	556055	Polynucleobacter	119060	Burkholderiaceae	80840	Burkholderiales	28216	Betaproteobacteria	1224	Proteobacteria	2	Bacteria	131567	cellular organisms
WP_114801550.1	Pseudacidovorax intermedius	433924	Pseudacidovorax intermedius	433924	Pseudacidovorax	80864	Comamonadaceae	80840	Burkholderiales	28216	Betaproteobacteria	1224	Proteobacteria	2	Bacteria	131567	cellular organisms
WP_115693209.1	Pseudolabrys taiwanensis	331696	Pseudolabrys taiwanensis	331696	Pseudolabrys	335928	Xanthobacteraceae	356	Rhizobiales	28211	Alphaproteobacteria	1224	Proteobacteria	2	Bacteria	131567	cellular organisms
WP_162826919.1	Pseudolabrys taiwanensis	331696	Pseudolabrys taiwanensis	331696	Pseudolabrys	335928	Xanthobacteraceae	356	Rhizobiales	28211	Alphaproteobacteria	1224	Proteobacteria	2	Bacteria	131567	cellular organisms
WP_157699772.1	Pseudorhodoplanes sinuspersici	1235591	Pseudorhodoplanes sinuspersici	1235591	Pseudorhodoplanes	119042	Rhizobiales incertae sedis	356	Rhizobiales	28211	Alphaproteobacteria	1224	Proteobacteria	2	Bacteria	131567	cellular organisms
WP_130039873.1	Pusillimonas harenae	657015	Pusillimonas harenae	657015	Pusillimonas	506	Alcaligenaceae	80840	Burkholderiales	28216	Betaproteobacteria	1224	Proteobacteria	2	Bacteria	131567	cellular organisms
WP_135262671.1	Ramlibacter henchirensis	204072	Ramlibacter henchirensis	204072	Ramlibacter	80864	Comamonadaceae	80840	Burkholderiales	28216	Betaproteobacteria	1224	Proteobacteria	2	Bacteria	131567	cellular organisms
WP_135265652.1	Ramlibacter henchirensis	204072	Ramlibacter henchirensis	204072	Ramlibacter	80864	Comamonadaceae	80840	Burkholderiales	28216	Betaproteobacteria	1224	Proteobacteria	2	Bacteria	131567	cellular organisms
WP_135283200.1	Ramlibacter rhizophilus	1781167	Ramlibacter rhizophilus	1781167	Ramlibacter	80864	Comamonadaceae	80840	Burkholderiales	28216	Betaproteobacteria	1224	Proteobacteria	2	Bacteria	131567	cellular organisms
WP_135285370.1	Ramlibacter rhizophilus	1781167	Ramlibacter rhizophilus	1781167	Ramlibacter	80864	Comamonadaceae	80840	Burkholderiales	28216	Betaproteobacteria	1224	Proteobacteria	2	Bacteria	131567	cellular organisms
WP_170302985.1	Reyranella soli	1230389	Reyranella soli	1230389	Reyranella	451274	Rhodospirillales incertae sedis	204441	Rhodospirillales	28211	Alphaproteobacteria	1224	Proteobacteria	2	Bacteria	131567	cellular organisms
WP_085748802.1	Rhizobacter gummiphilus	946333	Rhizobacter gummiphilus	946333	Rhizobacter	224471	Burkholderiales genera incertae sedis	80840	Burkholderiales	28216	Betaproteobacteria	1224	Proteobacteria	2	Bacteria	131567	cellular organisms
WP_129607191.1	Rhodoplanes piscinae	444923	Rhodoplanes piscinae	444923	Rhodoplanes	45401	Hyphomicrobiaceae	356	Rhizobiales	28211	Alphaproteobacteria	1224	Proteobacteria	2	Bacteria	131567	cellular organisms
WP_130431469.1	Rivibacter subsaxonicus	457575	Rivibacter subsaxonicus	457575	Rivibacter	224471	Burkholderiales genera incertae sedis	80840	Burkholderiales	28216	Betaproteobacteria	1224	Proteobacteria	2	Bacteria	131567	cellular organisms
WP_043830108.1	Roseomonas aerilata	452982	Roseomonas aerilata	1123060	Roseomonas	433	Acetobacteraceae	204441	Rhodospirillales	28211	Alphaproteobacteria	1224	Proteobacteria	2	Bacteria	131567	cellular organisms
WP_159349739.1	Roseomonas deserti	1817963	Roseomonas deserti	1817963	Roseomonas	433	Acetobacteraceae	204441	Rhodospirillales	28211	Alphaproteobacteria	1224	Proteobacteria	2	Bacteria	131567	cellular organisms
WP_140882642.1	Roseomonas nepalensis	1854500	Roseomonas nepalensis	1854500	Roseomonas	433	Acetobacteraceae	204441	Rhodospirillales	28211	Alphaproteobacteria	1224	Proteobacteria	2	Bacteria	131567	cellular organisms
WP_161993785.1	Roseomonas nepalensis	1854500	Roseomonas nepalensis	1854500	Roseomonas	433	Acetobacteraceae	204441	Rhodospirillales	28211	Alphaproteobacteria	1224	Proteobacteria	2	Bacteria	131567	cellular organisms
WP_180684058.1	Tepidicella baoligensis	2707016	Tepidicella baoligensis	2707016	Tepidicella	224471	Burkholderiales genera incertae sedis	80840	Burkholderiales	28216	Betaproteobacteria	1224	Proteobacteria	2	Bacteria	131567	cellular organisms
WP_159279532.1	Variovorax boronicumulans	436515	Variovorax boronicumulans	436515	Variovorax	80864	Comamonadaceae	80840	Burkholderiales	28216	Betaproteobacteria	1224	Proteobacteria	2	Bacteria	131567	cellular organisms
WP_159279588.1	Variovorax boronicumulans	436515	Variovorax boronicumulans	436515	Variovorax	80864	Comamonadaceae	80840	Burkholderiales	28216	Betaproteobacteria	1224	Proteobacteria	2	Bacteria	131567	cellular organisms
WP_140840857.1	Variovorax	34072	Variovorax guangxiensis	1775474	Variovorax	80864	Comamonadaceae	80840	Burkholderiales	28216	Betaproteobacteria	1224	Proteobacteria	2	Bacteria	131567	cellular organisms
WP_140844002.1	Variovorax	34072	Variovorax guangxiensis	1775474	Variovorax	80864	Comamonadaceae	80840	Burkholderiales	28216	Betaproteobacteria	1224	Proteobacteria	2	Bacteria	131567	cellular organisms
WP_015867783.1	Variovorax paradoxus	34073	Variovorax paradoxus	543728	Variovorax	80864	Comamonadaceae	80840	Burkholderiales	28216	Betaproteobacteria	1224	Proteobacteria	2	Bacteria	131567	cellular organisms
WP_150106877.1	Variovorax paradoxus	34073	Variovorax paradoxus	543728	Variovorax	80864	Comamonadaceae	80840	Burkholderiales	28216	Betaproteobacteria	1224	Proteobacteria	2	Bacteria	131567	cellular organisms
WP_143946511.1	Verticiella sediminum	1247510	Verticiella sediminum	1247510	Verticiella	506	Alcaligenaceae	80840	Burkholderiales	28216	Betaproteobacteria	1224	Proteobacteria	2	Bacteria	131567	cellular organisms
WP_110466210.1	Xylophilus ampelinus	54067	Xylophilus ampelinus	54067	Xylophilus	224471	Burkholderiales genera incertae sedis	80840	Burkholderiales	28216	Betaproteobacteria	1224	Proteobacteria	2	Bacteria	131567	cellular organisms
WP_104301277.1	Zhizhongheella caldifontis	1452508	Zhizhongheella caldifontis	1452508	Zhizhongheella	80864	Comamonadaceae	80840	Burkholderiales	28216	Betaproteobacteria	1224	Proteobacteria	2	Bacteria	131567	cellular organisms

## Sheet: B_TphC Homolog Analysis
Accession	Max Score	Total Score	Query Cover	E value	Per. ident	Acc. Len	P29-D37	F30	G34-D37	A36	P86	P87	Q150	S154	T155	S156	G178	T179	N197	T242	F244
WP_019043844.1	query	query	query	query	100	322	PFSAGGTAD	F	GTAD	A	P	P	Q	S	T	S	G	T	N	T	F
WP_003814318.1	254	254	0.91	3e-80	42.57	326	PFPPGGPTD	F	GPTD	T	T	S	S	A	S	S	G	T	D	V	F
WP_009515009.1	371	371	0.95	6e-126	60.9	330	PFPAGGTAD	F	GTAD	A	P	P	Q	S	T	S	G	T	N	T	F
WP_010929711.1	251	251	0.91	4e-79	42.23	326	PFPPGGPTD	F	GPTD	T	T	S	S	A	S	S	G	T	D	V	F
WP_012655492.1	259	259	0.9	4e-82	42.52	345	PFAAGGTTD	F	GTTD	T	T	V	S	T	S	I	G	S	N	S	F
WP_012837657.1	645	645	1	0	98.14	322	PFSAGGTAD	F	GTAD	A	P	P	Q	S	T	S	G	T	N	T	F
WP_013520309.1	251	251	0.89	4e-79	42.71	330	PFSAGGTTD	F	GTTD	T	T	V	P	A	S	P	G	S	N	S	F
WP_015867783.1	254	254	0.93	4e-80	43.27	339	PFAAGGTTD	F	GTTD	T	T	V	S	T	S	I	G	S	N	S	F
WP_015914171.1	255	255	0.89	2e-80	43.6	330	PFSAGGTTD	F	GTTD	T	T	V	P	A	S	P	G	S	N	S	F
WP_018006032.1	251	251	0.91	6e-79	42.91	324	TYPPGGPTD	Y	GPTD	T	T	S	S	A	S	S	G	T	D	V	F
WP_018006224.1	255	255	0.9	2e-80	45.15	333	PFAAGGTTD	F	GTTD	T	T	V	S	T	S	I	G	S	N	S	F
WP_019139588.1	252	252	0.91	2e-79	43.19	330	PFTAAGTTD	F	GTTD	T	T	V	S	T	S	I	G	S	N	S	F
WP_019560447.1	262	262	0.91	4e-83	44.67	330	PFAPGGTTD	F	GTTD	T	T	V	S	T	S	I	G	S	N	S	F
WP_019573105.1	254	254	0.99	6e-80	40.73	335	PFSPGGPTD	F	GPTD	T	T	S	S	A	S	S	G	T	D	V	F
WP_019577253.1	251	251	0.92	1e-78	40.65	355	PFAPGGTTD	F	GTTD	T	T	V	S	T	S	I	G	S	N	S	F
WP_020652673.1	261	261	0.88	9e-83	45.8	335	PFSAGGTTD	F	GTTD	T	T	V	S	S	S	I	G	S	N	S	F
WP_024005372.1	319	319	0.96	9e-106	51.94	326	PFPAGGTAD	F	GTAD	A	P	P	Q	T	T	S	G	T	N	T	F
WP_027017063.1	264	264	0.98	4e-84	40.62	323	DFPPGGTVD	F	GTVD	V	P	P	Q	S	T	S	G	E	N	A	F
WP_027017069.1	419	419	0.98	4e-145	63.09	322	PFSAGGTAD	F	GTAD	A	P	P	Q	S	T	S	G	T	N	T	F
WP_027478907.1	254	254	0.99	1e-79	39.18	376	PFAPGGTTD	F	GTTD	T	T	V	S	T	S	I	G	S	N	S	F
WP_043352773.1	253	253	0.98	1e-79	40.5	326	TYPPGGPTD	Y	GPTD	T	T	S	S	A	S	S	G	T	D	V	F
WP_043517852.1	256	256	0.91	5e-81	42.81	333	PFPAGGTAD	F	GTAD	A	T	V	T	T	S	T	G	S	N	S	F
WP_043830108.1	263	263	0.92	1e-83	46.67	324	PFPAGGTAD	F	GTAD	A	P	P	Q	T	T	S	G	T	N	A	Y
WP_046112872.1	258	258	0.92	2e-81	43.18	332	PFAAGGTTD	F	GTTD	T	T	V	S	T	S	I	G	S	N	S	F
WP_051443420.1	254	254	0.99	6e-80	40.73	338	PFSPGGPTD	F	GPTD	T	T	S	S	A	S	S	G	T	D	V	F
WP_054022746.1	433	433	0.98	8e-151	64.15	322	PYPAGGTAD	Y	GTAD	A	P	P	Q	T	T	S	G	T	N	T	F
WP_054067327.1	252	252	0.98	3e-79	43.03	331	PFSAGGTTD	F	GTTD	T	T	V	P	A	S	P	G	S	N	S	F
WP_057845088.1	301	301	0.91	1e-98	50.68	328	PFPAGGTAD	F	GTAD	A	P	P	Q	S	T	S	G	T	N	T	F
WP_062801824.1	253	253	0.9	9e-80	44.82	333	PFAAGGTTD	F	GTTD	T	T	V	S	T	S	I	G	S	N	S	F
WP_062804022.1	253	253	0.91	6e-80	42.91	324	TYPPGGPTD	Y	GPTD	T	T	S	S	A	S	S	G	T	D	V	F
WP_066705791.1	258	258	0.98	1e-81	41.77	338	PFAPGGTTD	F	GTTD	T	T	V	S	T	S	I	G	S	N	S	F
WP_066708114.1	361	361	0.97	2e-122	56.33	318	PFPAGGTAD	F	GTAD	A	P	P	Q	S	T	S	G	T	N	T	F
WP_085748802.1	252	252	0.9	4e-79	42.14	332	PFAPGGTTD	F	GTTD	T	T	V	S	T	S	I	G	S	N	S	F
WP_087281897.1	261	261	0.91	5e-83	46.46	331	PFPPGGPTD	F	GPTD	T	T	S	S	A	S	S	G	T	D	V	F
WP_088603386.1	250	250	0.9	1e-78	41.84	328	GFSAGGTTD	F	GTTD	T	A	V	S	T	S	I	G	S	N	S	F
WP_088888403.1	254	254	0.89	3e-80	43.6	330	PFSAGGTTD	F	GTTD	T	T	V	P	A	S	P	G	S	N	S	F
WP_089401330.1	255	255	1	2e-80	41.84	338	PFTAGGTTD	F	GTTD	T	T	V	S	T	S	I	G	S	N	S	F
WP_092696893.1	253	253	0.95	1e-79	41.94	336	PFSAGGTTD	F	GTTD	T	T	V	P	A	S	P	G	S	N	S	F		WP_009515009.1
WP_092952237.1	256	256	0.91	2e-80	42.72	361	PFAPGGTTD	F	GTTD	T	T	V	S	T	S	I	G	S	N	S	F
WP_103018016.1	259	259	0.97	4e-82	41.99	338	PFAAGGTTD	F	GTTD	T	T	V	S	T	S	I	G	S	N	S	F
WP_104301277.1	415	415	1	2e-143	62.85	323	PFPAGGTAD	F	GTAD	A	P	P	Q	S	T	S	G	T	N	T	F
WP_105241586.1	251	251	0.9	4e-79	42.91	333	PFPAGGTAD	F	GTAD	A	T	V	T	T	S	T	G	S	N	S	F
WP_105748278.1	263	263	0.99	8e-84	42.41	328	PFAAGGTTD	F	GTTD	T	T	I	A	T	S	I	G	S	N	S	F
WP_108401532.1	337	337	0.9	1e-112	55.29	321	PFPAGGTAD	F	GTAD	A	P	P	Q	S	T	S	G	T	N	T	F
WP_108512349.1	269	269	0.98	5e-86	43.03	333	PFPAGGTAD	F	GTAD	A	A	P	Q	T	T	S	G	S	N	A	Y
WP_108646212.1	278	278	1	1e-89	41.46	327	PNPAGGTAD	N	GTAD	A	P	P	Q	S	T	A	G	D	N	T	F
WP_110466210.1	258	258	0.96	2e-81	42.68	336	PFAAGGTTD	F	GTTD	T	T	V	S	S	S	I	G	S	N	S	F
WP_111519084.1	253	253	0.9	1e-79	44.82	333	PFAAGGTTD	F	GTTD	T	T	V	S	T	S	I	G	S	N	S	F
WP_111520876.1	251	251	0.91	3e-79	42.57	324	TYPPGGPTD	Y	GPTD	T	T	S	S	A	S	S	G	T	D	V	F
WP_114186742.1	256	256	0.98	4e-81	41.18	330	PFTAGGTTD	F	GTTD	T	T	V	S	T	S	I	G	S	N	S	F
WP_114768374.1	252	252	0.97	2e-79	41.49	332	PFTAGGTTD	F	GTTD	T	T	V	S	T	S	I	G	S	N	S	F
WP_114801550.1	252	252	0.98	2e-79	41.3	328	PFPPGGPTD	F	GPTD	T	T	S	S	A	S	S	G	T	D	V	F
WP_115693209.1	282	282	0.93	3e-91	46.89	323	PFPAGGTAD	F	GTAD	A	P	P	Q	T	T	S	G	S	N	A	Y
WP_116960468.1	373	373	0.9	9e-127	63.23	330	PFPAGGTAD	F	GTAD	A	P	P	Q	S	T	S	G	T	N	T	F
WP_119157698.1	253	253	0.96	1e-79	42.68	338	PFSAGGTTD	F	GTTD	T	T	V	P	S	S	P	G	S	N	S	F
WP_119555032.1	254	254	0.9	5e-80	43.52	344	PFAAGGTTD	F	GTTD	T	T	V	S	T	S	I	G	S	N	S	F
WP_123674889.1	259	259	0.9	6e-82	42.52	345	PFAAGGTTD	F	GTTD	T	T	V	S	T	S	I	G	S	N	S	F
WP_124540981.1	258	258	0.98	1e-81	40.8	332	PFAPGGTTD	F	GTTD	T	T	V	S	T	S	I	G	S	N	S	F
WP_127090157.1	252	252	0.98	2e-79	44.14	335	PFSAGGTTD	F	GTTD	T	T	V	S	T	S	I	G	S	N	S	F
WP_128003434.1	352	352	1	1e-118	53.11	325	PFPAGGTAD	F	GTAD	A	P	P	Q	S	T	S	G	T	N	T	F
WP_129607191.1	250	250	0.9	9e-79	43.49	322	PAAAGGPTY	A	GPTY	T	T	I	G	T	S	M	G	S	A	G	I
WP_130039873.1	263	263	0.96	1e-83	41.8	327	PFSAGGTSD	F	GTSD	S	T	V	S	S	S	I	G	S	N	A	F
WP_130358578.1	275	275	0.95	2e-88	44.84	321	DFPAGGTID	F	GTID	I	P	P	Q	S	T	S	G	E	N	A	F
WP_130358990.1	332	332	0.91	7e-111	56.12	324	PYSAGGTAD	Y	GTAD	A	P	P	Q	T	T	S	G	T	N	T	F
WP_130431469.1	250	250	0.91	1e-78	43.67	327	PFAAGGTTD	F	GTTD	T	T	V	S	T	S	I	G	S	N	S	F
WP_135262671.1	263	263	0.9	1e-83	43.34	323	NFPPGGSLD	F	GSLD	L	P	P	Q	S	T	S	G	E	N	A	F
WP_135265652.1	415	415	0.99	2e-143	61.49	325	PFPAGGTAD	F	GTAD	A	P	P	Q	S	T	S	G	T	N	T	F
WP_135283200.1	410	410	0.93	2e-141	64.57	329	PFPAGGTAD	F	GTAD	A	P	P	Q	S	T	S	G	T	N	T	F
WP_135285370.1	276	276	0.91	6e-89	44.9	324	NFPPGGSLD	F	GSLD	L	P	P	Q	S	T	S	G	E	N	A	F
WP_136572427.1	252	252	0.98	2e-79	42.38	335	PFSAGGTTD	F	GTTD	T	T	V	S	S	S	I	G	S	N	S	F
WP_137734894.1	252	252	0.94	3e-79	41.8	333	PFAAAGTTD	F	GTTD	T	T	V	S	T	S	I	G	S	N	S	F
WP_139859134.1	288	288	0.96	2e-93	47.65	325	PFPAGGTAD	F	GTAD	A	P	P	Q	S	T	S	G	T	N	T	F
WP_140840857.1	251	251	0.91	1e-78	41.72	341	PFAAGGTTD	F	GTTD	T	T	V	S	T	S	I	G	S	N	S	F
WP_140844002.1	258	258	0.91	8e-82	43.73	330	PFSAGGTTD	F	GTTD	T	T	V	S	S	S	I	G	S	N	S	F
WP_140882642.1	273	273	0.9	9e-88	45.05	324	PFPAGGTAD	F	GTAD	A	P	P	Q	T	T	S	G	T	N	A	Y
WP_143946511.1	291	291	0.91	7e-95	50	322	PYPAGGTAD	Y	GTAD	A	P	P	Q	T	T	S	G	T	N	T	F
WP_146984371.1	255	255	0.94	1e-80	43.51	327	PVPPGPLLD	V	PLLD	L	P	P	P	S	T	P	G	M	L	E	F
WP_148813679.1	257	257	0.98	3e-81	42.38	337	PFSAGGTTD	F	GTTD	T	T	V	S	T	S	I	G	S	N	S	F
WP_150106877.1	258	258	0.91	2e-81	44.93	330	PFPPGGPTD	F	GPTD	T	T	S	S	A	S	S	G	T	D	V	F
WP_152544232.1	299	299	0.95	1e-97	49.68	345	PFPAGGTAD	F	GTAD	A	P	P	Q	S	T	S	G	T	N	T	F
WP_153586175.1	251	251	0.92	1e-78	41.23	335	PFAAGGTTD	F	GTTD	T	T	V	S	T	S	I	G	S	N	S	F
WP_157699772.1	279	279	0.95	6e-90	47.42	317	PFPAGGTAD	F	GTAD	A	P	P	Q	T	T	S	G	T	N	A	Y
WP_159279532.1	261	261	0.9	7e-83	45.76	329	PFPPGGPTD	F	GPTD	T	T	S	S	A	S	S	G	T	D	V	F
WP_159279588.1	254	254	0.9	4e-80	43.19	345	PFAAGGTTD	F	GTTD	T	T	V	S	T	S	I	G	S	N	S	F
WP_159349739.1	251	251	0.93	8e-79	42.86	327	PFPAGGSND	F	GSND	N	P	P	Q	T	T	S	G	E	N	A	F
WP_161993785.1	270	270	0.93	2e-86	42.33	330	PFPAGGSND	F	GSND	N	P	P	Q	T	T	S	G	E	N	A	F
WP_162826919.1	260	260	0.9	1e-82	45.73	322	DVPAGGGVD	V	GGVD	V	Q	P	Q	T	T	S	G	T	E	T	N
WP_170302985.1	301	301	0.91	9e-99	50.68	320	PFPAGGSAD	F	GSAD	A	P	P	Q	S	T	S	G	E	N	A	F
WP_170920738.1	293	293	0.89	1e-95	48.79	290	PFPGGGSND	F	GSND	N	P	P	Q	S	T	S	G	E	N	A	F
WP_171665181.1	253	253	0.9	7e-80	42.91	333	PFPAGGTAD	F	GTAD	A	T	V	T	T	S	T	G	S	N	S	F
WP_175128990.1	255	255	0.98	2e-80	41.16	333	PFPAGGTAD	F	GTAD	A	T	V	T	T	S	T	G	S	N	S	F
WP_175129530.1	251	251	0.91	4e-79	42.76	327	PFPPGGPTD	F	GPTD	T	T	S	S	A	S	S	G	T	D	V	F
WP_175138404.1	252	252	0.9	3e-79	43.24	333	PFPAGGTAD	F	GTAD	A	T	V	T	T	S	T	G	S	N	S	F
WP_175169383.1	253	253	0.98	1e-79	40.92	333	PFPAGGTAD	F	GTAD	A	T	V	T	T	S	T	G	S	N	S	F
WP_175174331.1	259	259	0.94	7e-82	42.53	333	PFPAGGTAD	F	GTAD	A	T	V	T	T	S	T	G	S	N	S	F
WP_175213716.1	251	251	1	5e-79	40.18	337	PFPAGGTTD	F	GTTD	T	T	V	T	T	S	T	G	S	N	S	F
WP_179582675.1	313	313	0.9	2e-103	53.58	325	PYSAGGTAD	Y	GTAD	A	P	P	Q	T	T	S	G	T	N	T	F
WP_179586306.1	319	319	0.96	1e-105	50.47	329	PFPPSGNLD	F	GNLD	L	P	Y	Q	S	S	S	G	T	T	A	Y
WP_180098422.1	255	255	0.9	2e-80	43.24	333	PFPAGGTAD	F	GTAD	A	T	V	T	T	S	T	G	S	N	S	F
WP_180684058.1	437	437	1	3e-152	67.08	323	PFPAGGTAD	F	GTAD	A	P	P	Q	S	T	S	G	T	N	T	F
WP_187399298.1	267	267	0.91	4e-85	44.41	333	PFPAGGTAD	F	GTAD	A	P	P	Q	T	T	S	G	S	N	A	Y

## Sheet:  C_tph-like operon
Entry	Species	Common Name	P29-D37	F30	G34-D37	A36	P86	P87	Q150	S154	T155	S156	G178	T179	N197	T242	F244	Per. ident	Family	Order	Class		Unique Family	Count	Unique Order	Count	Unique Class	Count
WP_019043844.1	Comomonas sp. E6	Comomonas sp. E6	PFSAGGTAD	F	GTAD	A	P	P	Q	S	T	S	G	T	N	T	F	100	Comamonadaceae	Burkholderiales	Betaproteobacteria		Comamonadaceae	10	Burkholderiales	17	Betaproteobacteria	17
WP_009515009.1	Hydrogenophaga intermedia	Hydrogenophaga	PFPAGGTAD	F	GTAD	A	P	P	Q	S	T	S	G	T	N	T	F	60.9	Comamonadaceae	Burkholderiales	Betaproteobacteria		Alcaligenaceae	4	Rhizobiales	3	Alphaproteobacteria	6
WP_012837657.1	Comamonas thiooxydans	Comamonas thiooxydans	PFSAGGTAD	F	GTAD	A	P	P	Q	S	T	S	G	T	N	T	F	98.14	Comamonadaceae	Burkholderiales	Betaproteobacteria		Burkholderiales genera incertae sedis	3	Rhodospirillales	3
WP_024005372.1	Advenella kashmirensis	Advenella kashmirensis	PFPAGGTAD	F	GTAD	A	P	P	Q	T	T	S	G	T	N	T	F	51.94	Alcaligenaceae	Burkholderiales	Betaproteobacteria		Bradyrhizobiaceae	3
WP_027017069.1	Comamonas composti	Comamonas composti	PFSAGGTAD	F	GTAD	A	P	P	Q	S	T	S	G	T	N	T	F	98	Comamonadaceae	Burkholderiales	Betaproteobacteria		Acetobacteraceae	2
WP_054022746.1	Ideonella sakaiensis	Ideonella sakaiensis	PYPAGGTAD	Y	GTAD	A	P	P	Q	T	T	S	G	T	N	T	F	64.15	Burkholderiales genera incertae sedis	Burkholderiales	Betaproteobacteria		Rhodospirillales incertae sedis	1
WP_057845088.1	Bradyrhizobium retamae	Bradyrhizobium retamae	PFPAGGTAD	F	GTAD	A	P	P	Q	S	T	S	G	T	N	T	F	50.68	Bradyrhizobiaceae	Rhizobiales	Alphaproteobacteria
WP_066708114.1	Curvibacter delicatus	Curvibacter delicatus	PFPAGGTAD	F	GTAD	A	P	P	Q	S	T	S	G	T	N	T	F	56.33	Comamonadaceae	Burkholderiales	Betaproteobacteria
WP_104301277.1	Zhizhongheella caldifontis	Zhizhongheella caldifontis	PFPAGGTAD	F	GTAD	A	P	P	Q	S	T	S	G	T	N	T	F	62.85	Comamonadaceae	Burkholderiales	Betaproteobacteria
WP_108401532.1	Limnohabitans curvus	Limnohabitans curvus	PFPAGGTAD	F	GTAD	A	P	P	Q	S	T	S	G	T	N	T	F	55.29	Comamonadaceae	Burkholderiales	Betaproteobacteria
WP_116960468.1	Hydrogenophaga borbori	Hydrogenophaga borbori	PFPAGGTAD	F	GTAD	A	P	P	Q	S	T	S	G	T	N	T	F	63.23	Comamonadaceae	Burkholderiales	Betaproteobacteria
WP_128003434.1	Piscinibacter defluvii	Piscinibacter defluvii	PFPAGGTAD	F	GTAD	A	P	P	Q	S	T	S	G	T	N	T	F	53.11	Burkholderiales genera incertae sedis	Burkholderiales	Betaproteobacteria
WP_130358990.1	Pigmentiphaga kullae	Pigmentiphaga kullae	PYSAGGTAD	Y	GTAD	A	P	P	Q	T	T	S	G	T	N	T	F	56.12	Alcaligenaceae	Burkholderiales	Betaproteobacteria
WP_135265652.1	Ramlibacter henchirensis	Ramlibacter henchirensis	PFPAGGTAD	F	GTAD	A	P	P	Q	S	T	S	G	T	N	T	F	61.49	Comamonadaceae	Burkholderiales	Betaproteobacteria
WP_135283200.1	Ramlibacter rhizophilus	Ramlibacter rhizophilus	PFPAGGTAD	F	GTAD	A	P	P	Q	S	T	S	G	T	N	T	F	64.57	Comamonadaceae	Burkholderiales	Betaproteobacteria
WP_139859134.1	Bradyrhizobium ivorense	Bradyrhizobium ivorense	PFPAGGTAD	F	GTAD	A	P	P	Q	S	T	S	G	T	N	T	F	47.65	Bradyrhizobiaceae	Rhizobiales	Alphaproteobacteria
WP_143946511.1	Verticiella sediminum	Verticiella sediminum	PYPAGGTAD	Y	GTAD	A	P	P	Q	T	T	S	G	T	N	T	F	50	Alcaligenaceae	Burkholderiales	Betaproteobacteria
WP_152544232.1	Afipia sp. NBIMC_P1-C2	Afipia	PFPAGGTAD	F	GTAD	A	P	P	Q	S	T	S	G	T	N	T	F	49.68	Bradyrhizobiaceae	Rhizobiales	Alphaproteobacteria
WP_159349739.1	Roseomonas deserti	Roseomonas deserti	PFPAGGSND	F	GSND	N	P	P	Q	T	T	S	G	E	N	A	F	42.86	Acetobacteraceae	Rhodospirillales	Alphaproteobacteria
WP_161993785.1	Roseomonas nepalensis	Roseomonas nepalensis	PFPAGGSND	F	GSND	N	P	P	Q	T	T	S	G	E	N	A	F	42.33	Acetobacteraceae	Rhodospirillales	Alphaproteobacteria
WP_170920738.1	Enhydrobacter aerosaccus	Enhydrobacter aerosaccus	PFPGGGSND	F	GSND	N	P	P	Q	S	T	S	G	E	N	A	F	48.79	Rhodospirillales incertae sedis	Rhodospirillales	Alphaproteobacteria
WP_179582675.1	Pigmentiphaga litoralis	Pigmentiphaga litoralis	PYSAGGTAD	Y	GTAD	A	P	P	Q	T	T	S	G	T	N	T	F	53.58	Alcaligenaceae	Burkholderiales	Betaproteobacteria
WP_180684058.1	Tepidicella baoligensis	Tepidicella baoligensis	PFPAGGTAD	F	GTAD	A	P	P	Q	S	T	S	G	T	N	T	F	67.08	Burkholderiales genera incertae sedis	Burkholderiales	Betaproteobacteria

## Sheet: D_All_operons
	LOCUS	species	taxid	Prot_Name_and_Strand	prot_name	prot_name_walk	prot_id	name_for_clustal_o	E6_similarity	strand	length	prot_seq	poten_trunc	position_start	position_end	id	assigned_identity	operon_type	operon_subtype	to_be_plotted	base_taxid	base_taxname	base_taxid_equals_recovered_taxid_?	strain_taxid	strain_lookup	species_taxid	species_lookup	genus_taxid	genus_lookup	family_taxid	family_lookup	order_taxid	order_lookup	class_taxid	class_lookup	phylum_taxid	phylum_lookup	superkingdom_taxid	superkingdom_lookup	empire_taxid	empire_lookup
1	NC_012791.1[5276733..5291762]	Variovorax paradoxus S110	543728	ABC transporter permease_1	ABC transporter permease	ABC transporter permease	WP_015867715.1	1#WP_015867715.1#NC_012791.1[5276733..5291762]	NA	1	769	MNTTTASSSSSAAPSPPARSVWRAPELSLRWWPVFLRNLLVWRKLAIPSLIGNIAEPLIWLVAFGYGMGALVGEVSVDGTRVPYILFLASGSICMSAMNAASFEALYSAFSRMHVQKTWDGIMNAPVGLDDIVLAEMLWAAFKSIFTVTAILFVMLGLGISHSPKLIVAWTVLIGAGITFSSIALIFNALAKGYDFFTYYFTLFMTPMMFLSGVFFPLEQLPSAVRAVAAWLPLTNAVALVRPLFMDQWPGGWWVHAGVLVVYGVVSFWVALALTRKRFRG	1	0	769	1	NA	NA	NA	no_plot	543728	Variovorax paradoxus S110	TRUE	543728	Variovorax paradoxus S110	34073	Variovorax paradoxus	34072	Variovorax	80864	Comamonadaceae	80840	Burkholderiales	28216	Betaproteobacteria	1224	Proteobacteria	2	Bacteria	131567	cellular organisms
2	NC_012791.1[5276733..5291762]	Variovorax paradoxus S110	543728	MarR family transcriptional regulator_1	MarR family transcriptional regulator	MarR family transcriptional regulator	WP_015867716.1	2#WP_015867716.1#NC_012791.1[5276733..5291762]	NA	1	462	MRSSPTTQASDEMLKLDNQLCFAVYSASLAMTRLYKPVLEKLQLTYPQYLVMLALWEQDGPTVSELGERLSLDSGTLTPLLKRLEAVGYVTRLRDVADERRVHITLTAAGRKLKARAAGVPGCLMAAAQCSVPELISLTQQIQTLRDRIRKAA	0	881	1343	2	NA	NA	NA	no_plot	543728	Variovorax paradoxus S110	TRUE	543728	Variovorax paradoxus S110	34073	Variovorax paradoxus	34072	Variovorax	80864	Comamonadaceae	80840	Burkholderiales	28216	Betaproteobacteria	1224	Proteobacteria	2	Bacteria	131567	cellular organisms
3	NC_012791.1[5276733..5291762]	Variovorax paradoxus S110	543728	organic hydroperoxide resistance protein_1	organic hydroperoxide resistance protein	organic hydroperoxide resistance protein	WP_015867717.1	3#WP_015867717.1#NC_012791.1[5276733..5291762]	NA	1	426	MTTKLDKVLYTAEAHTIGGRDGAGKSSDGAIDVKLSSPGSGKPGTNPEQLFAVGYAACFIGAMKAVGPKIGVKVPEDVAIDSSVSLGPTNGGAAYGIAVKLAITLPGLDAEQKQKLVDAAHQVCPYSNATRGNIDVELSIA	0	1432	1858	3	NA	NA	NA	no_plot	543728	Variovorax paradoxus S110	TRUE	543728	Variovorax paradoxus S110	34073	Variovorax paradoxus	34072	Variovorax	80864	Comamonadaceae	80840	Burkholderiales	28216	Betaproteobacteria	1224	Proteobacteria	2	Bacteria	131567	cellular organisms
4	NC_012791.1[5276733..5291762]	Variovorax paradoxus S110	543728	DUF2855 family protein_1	DUF2855 family protein	DUF2855 family protein	WP_015867718.1	4#WP_015867718.1#NC_012791.1[5276733..5291762]	NA	1	1179	MWLQHAPSRATHTTTMEIHTMSTTTSFLIRKGELATTQLHTATDQPLADGQVRVRIDSFALTSNNITYAAFGDAMSYWQFFPSTEEGWGSIPVWGFASVVQSLHTGVAVGERLYGYWPMSSGAVLSPDRLSPGRFTDAAPHRAELPAVYNQYFRCNADPLYTADTEDVQALLRPLFITSWLIDDFMADNDFFGANTMLLSSASSKTAYGTAFQLHQREGIEVIGLTSPANVAFCESLGCYHRVLTYDALDGIAADTPCVYVDFAGNAGLRNAIHTRFSNLKYSCSIGGTHVEQLAAKGAGKDLAGPRATLFFAPAQIKKRTAEWGADEFGRRMVAAWHHFLATVTDAKNPWLRAEHHHGGEAVQAAYAQVLAGKGDPRIGHILSLYKQPGGL	0	1995	3174	4	NA	NA	NA	no_plot	543728	Variovorax paradoxus S110	TRUE	543728	Variovorax paradoxus S110	34073	Variovorax paradoxus	34072	Variovorax	80864	Comamonadaceae	80840	Burkholderiales	28216	Betaproteobacteria	1224	Proteobacteria	2	Bacteria	131567	cellular organisms
5	NC_012791.1[5276733..5291762]	Variovorax paradoxus S110	543728	serine/threonine protein kinase_1	serine/threonine protein kinase	serine/threonine protein kinase	WP_015867719.1	5#WP_015867719.1#NC_012791.1[5276733..5291762]	NA	1	1035	MTLSPAAPANTHPYESLTPDVVLDALATLGLHGDGRLTGLNSYENRVYQVYLEDRSAVVVKFYRPERWSEAEILEEHGFSLELAAAEVPAVAPLAFDGSTLHRHGGFAFSVSPYRGGRAPELDDFEVLEWVGRFLARIHTVGSARPFEARPALDLQTFGIASRDWLLANDKVPLDVQRDWEKACNEALDMIAATALAVNAPASDFKPRKLRLHGDVHPGNILWTPTDRPGGGPHFVDLDDARTGFAVQDLWMLLSGERAQRTSQLSGLLDGYEQFREFDRRELALIEPLRTLRLIHYSAWLARRWEDPIFPINFPWFGSSDYWKGQILVLQEQCEQMAEEPLYA	0	3207	4242	5	NA	NA	NA	no_plot	543728	Variovorax paradoxus S110	TRUE	543728	Variovorax paradoxus S110	34073	Variovorax paradoxus	34072	Variovorax	80864	Comamonadaceae	80840	Burkholderiales	28216	Betaproteobacteria	1224	Proteobacteria	2	Bacteria	131567	cellular organisms
6	NC_012791.1[5276733..5291762]	Variovorax paradoxus S110	543728	LysR family transcriptional regulator_-1	LysR family transcriptional regulator	LysR family transcriptional regulator	WP_015867720.1	6#WP_015867720.1#NC_012791.1[5276733..5291762]	NA	-1	897	MELRHLRYFSVLAEELHFGRAARRLSISQPPLSVAIRQLEESVGARLFERNSKEVRLTHAGEALRISARRLLLQAEEAALEARDVAAGSAGRLRIGFVGAMLYRGLPQALRAFQARHPAVRITLAELNSGVQIAELLHDRLDLGFVHTSRMPPELQHRLLLSEPFVCCLPSGHALARKRVLAPADLRSQPFVLFSREASPDYHERILSICADAGFLPEVRHEVRHWLAVVSLVSQGMGVALVPQAMRHSALRGAVFRPLDRAVAQSEAHGVWRSGPPNVLAERLLQGVAESLAAEAAS	0	4238	5135	6	NA	NA	NA	no_plot	543728	Variovorax paradoxus S110	TRUE	543728	Variovorax paradoxus S110	34073	Variovorax paradoxus	34072	Variovorax	80864	Comamonadaceae	80840	Burkholderiales	28216	Betaproteobacteria	1224	Proteobacteria	2	Bacteria	131567	cellular organisms
7	NC_012791.1[5276733..5291762]	Variovorax paradoxus S110	543728	acyl-CoA dehydrogenase family protein_1	acyl-CoA dehydrogenase family protein	acyl-CoA dehydrogenase family protein	WP_015867721.1	7#WP_015867721.1#NC_012791.1[5276733..5291762]	NA	1	1725	MSDNAAHAAPEAAHAHPIPDRHGQNLFSTDTELHKLLALYLPADLLAHMQPHFERLGGLAGGLLDDLAGTADRNPPTLKQRTRTGLDEQKVVKHPAYVEMERLALSEFGLAAMSHRDQTLGWKGRMPPLVKYVLTYLFVQAEFGLCCPVSMTDSLTRTLKKFGGPELVARFLPRLTSLDFDELAQGAMFMTEQAAGSDIAATATMARQEADGSWRLSGDKWFCSNPDADFAMVLARADNGPAGMKGVSLFLLPRRLEDGSLNHYRIVRLKDKLGTRSMASGEIRLEGAVAYLVGEEGRGFVQMADMVNNSRLSNGVRAAGLMRRAVAEAEYIAAERRAFGRTLDQMPLMQRQLDKLRLPAEQARTMVCQTALALARSDAGEPDAYALLRILTPLIKFRA…	0	5225	6950	7	NA	NA	NA	no_plot	543728	Variovorax paradoxus S110	TRUE	543728	Variovorax paradoxus S110	34073	Variovorax paradoxus	34072	Variovorax	80864	Comamonadaceae	80840	Burkholderiales	28216	Betaproteobacteria	1224	Proteobacteria	2	Bacteria	131567	cellular organisms
8	NC_012791.1[5276733..5291762]	Variovorax paradoxus S110	543728	tripartite tricarboxylate transporter substrate binding protein_1	tripartite tricarboxylate transporter substrate binding protein	tripartite tricarboxylate transporter substrate binding protein	WP_150106877.1	8#WP_150106877.1#NC_012791.1[5276733..5291762]	NA	1	993	MILRHLTPFFAALAACAALLGAAPAAQAQGPFPSKPLMLVVPFPPGGPTDAMARTLAAEMKDRLGQPMIVENRAGAGGNIGADYVARAEADGHTLLFGTSGPLAINASLYRKISYDPVKSFAPVIQVGYLPNILVVNPALPVKDVKELVAYAKANPGKLSYASSGNGASSHLAGVLFNSVAGTDLQHIPYKGTGPALNDLLGNQVSMTFTDILTALPYVRAGKLRALGVATLARSQALPEVPTIAEQGYKGYDVSVFFGIVAPTGTPADRVARLNQAFAEVLNSPKVKQMFAAQGLEASADTSPQKLGQFIVSESAKWKDVVKKSGAQLD	0	6975	7968	8	tph_c	NA	NA	no_plot	543728	Variovorax paradoxus S110	TRUE	543728	Variovorax paradoxus S110	34073	Variovorax paradoxus	34072	Variovorax	80864	Comamonadaceae	80840	Burkholderiales	28216	Betaproteobacteria	1224	Proteobacteria	2	Bacteria	131567	cellular organisms
9	NC_012791.1[5276733..5291762]	Variovorax paradoxus S110	543728	CoA transferase_1	CoA transferase	CoA transferase	WP_015867723.1	9#WP_015867723.1#NC_012791.1[5276733..5291762]	NA	1	1152	MTNPQGALAGIRVLDISRILGGPYCGQILGDHGADVLKVEPPQGDDTRTWGPPFKDGVASYYHGLNRNKRVQHLDFSTDEGREALLALVAEADVLIENFKTGTMERWGIGYEALSARFPRLVWCRVSGFGADGPLGALPGYDAAVQAMTGIMSINGEADGGPLRVGLPVVDMVTGLNAVIGVLLALQERNRSGRGQFVEAALYDSGLSLLHPHAANWFMDGTEPRRTGNAHPNIYPYDALATGTDPVFVAVGNDRQFASLCRCIGLPALADDPLYRTAGARSVHRAGLKQQLEAAMAAFDGRALVEQLMAAGVPAAPVLPVDAALEHPHTAHREMVVEMEGGYRGIGAPVKLSRTPASYRHAPLTPGERFLPDAAAGTGASGS	0	8298	9450	9	NA	NA	NA	no_plot	543728	Variovorax paradoxus S110	TRUE	543728	Variovorax paradoxus S110	34073	Variovorax paradoxus	34072	Variovorax	80864	Comamonadaceae	80840	Burkholderiales	28216	Betaproteobacteria	1224	Proteobacteria	2	Bacteria	131567	cellular organisms
10	NC_012791.1[5276733..5291762]	Variovorax paradoxus S110	543728	LysR family transcriptional regulator_-1	LysR family transcriptional regulator	LysR family transcriptional regulator	WP_015867724.1	10#WP_015867724.1#NC_012791.1[5276733..5291762]	NA	-1	906	MELKQWRCFVTLAEIGNIRRAASLLAISQPALSVRVQRLEEALGFALFDRQARGVRLTEQGARLLPHARRLLSRAAETDEAARAIGRGAFDRLEIGVTPIAALSFFPDAMRAFSAAHPGVVLALTEGLSDELEEAVAHRRLDLAVVHPPSSRDDLVVREVARDRFMAVVPAAHPLAGAGRIAAADLRQQTLVGVRRDIGPVVFDRIAAYLARAGITTQVNQCASSSISLVGLVAAGAGIGLVVESLACIARPDIRFVALADDPPSLGYAMCHRPDLPAELQGAFMQAFHAPKAGAGARPVL	0	9444	10350	10	NA	NA	NA	no_plot	543728	Variovorax paradoxus S110	TRUE	543728	Variovorax paradoxus S110	34073	Variovorax paradoxus	34072	Variovorax	80864	Comamonadaceae	80840	Burkholderiales	28216	Betaproteobacteria	1224	Proteobacteria	2	Bacteria	131567	cellular organisms
11	NC_012791.1[5276733..5291762]	Variovorax paradoxus S110	543728	hypothetical protein_-1	hypothetical protein	hypothetical protein	WP_015867725.1	11#WP_015867725.1#NC_012791.1[5276733..5291762]	NA	-1	486	MKARPRTARAAAALAAALLLAAVSGCSHYHIGIPLVPGLSLGLGASKDGNFSVGLNTGWGPLGAGVAVNNTGVVAGTAGVGVGVGVGPVGTGVGVGKSVVLHDPNAGKAGYAPAGGAAPVTTAAAVSAPQPSAVRVSYRPPANAADAAAGSPGTPGNPVAP	0	10387	10873	11	NA	NA	NA	no_plot	543728	Variovorax paradoxus S110	TRUE	543728	Variovorax paradoxus S110	34073	Variovorax paradoxus	34072	Variovorax	80864	Comamonadaceae	80840	Burkholderiales	28216	Betaproteobacteria	1224	Proteobacteria	2	Bacteria	131567	cellular organisms
12	NC_012791.1[5276733..5291762]	Variovorax paradoxus S110	543728	molecular chaperone HtpG_-1	molecular chaperone HtpG	molecular chaperone HtpG	WP_015867726.1	12#WP_015867726.1#NC_012791.1[5276733..5291762]	NA	-1	2037	MADSSNTKLPFQAEVAQLLHLVTHALYSNKEIFLRELISNASDACDKLRFEALDHPELYEDQTELDVRLSFDKAARTITITDKGIGLSRQEAIENLGTIAKSGTKDFVSKLSGDQKADAQLIGQFGVGFYSGFIVADKITVESRRAGLPPEQGVRWTSGGAGDFEVADITRPERGTRITLHLRDDADEYLNAWKLKQIVGKYSDHISLPILMEKEEWKEGENDQPGDMVKTGEWETVNKASALWSRPKKDITPEQYEEFYKTISHDYEAPLAWSHNRVEGSTEYTQLLYIPSKAPFDLWNRDKSAGVKLYVKRVFIMDDAEALLPSYLRFVKGVIDSSDLPLNVSRELLQESRDVKAIREGSTKRVLGMLEDLARKQKTGPESGEGKIDVGSGESVPAP…	0	10869	12906	12	NA	NA	NA	no_plot	543728	Variovorax paradoxus S110	TRUE	543728	Variovorax paradoxus S110	34073	Variovorax paradoxus	34072	Variovorax	80864	Comamonadaceae	80840	Burkholderiales	28216	Betaproteobacteria	1224	Proteobacteria	2	Bacteria	131567	cellular organisms
13	NC_012791.1[5276733..5291762]	Variovorax paradoxus S110	543728	ABC transporter substrate-binding protein_-1	ABC transporter substrate-binding protein	ABC transporter substrate-binding protein	WP_015867727.1	13#WP_015867727.1#NC_012791.1[5276733..5291762]	NA	-1	1044	MRPFVQRNAAALAACAGAMALLFASGAAAEGTVNALCSTDAGWCEAAAAAFTRETGIRVQQAHKGTGEIGAQLRAEAANPKTDIWWGGTGDPFLQAAEQGLLEAYRPAYINDLHDWSVRQYAMSQNMVGGFYTSAIGFGFNTELLRRKKLHEPKCWADLAKPEYRGEIEISHPASSGTAYTIIAGLVQQMGEDAAFDYLKKLHRNVTSYTRSGQAQAPNVAKGEVAVGVSFIFGFERWRYDKFPVKTAAPCEGTSYEVGGIALVKGARNKENAKRYYDWLMSPAGQAIGGQVGSLQSPANKTFKPDPRIPSMSDVKLIKYDFEKYGRAAERKRLIDRWTREVESQAR	0	13016	14060	13	NA	NA	NA	no_plot	543728	Variovorax paradoxus S110	TRUE	543728	Variovorax paradoxus S110	34073	Variovorax paradoxus	34072	Variovorax	80864	Comamonadaceae	80840	Burkholderiales	28216	Betaproteobacteria	1224	Proteobacteria	2	Bacteria	131567	cellular organisms
14	NC_012791.1[5276733..5291762]	Variovorax paradoxus S110	543728	LysR family transcriptional regulator_-1	LysR family transcriptional regulator	LysR family transcriptional regulator	WP_015867728.1	14#WP_015867728.1#NC_012791.1[5276733..5291762]	NA	-1	913	MSPRLQGIEEFVAAVEAGSFARAAERLHVTRSAVAKSIGRLEARLGTRLFLRTTRSQSLTEEGHGYYERCRRVLAELDAAEAMADAARSTAAGLVRLSMPAMLGRLKVGPLLLALARRHPGLSLELSFNDRRVDLVEDGLDLAIRSGELADSAELVARPVGVQWMALCAAPAYLAERGRPGSVAELGASPSHEAVFYARDGQVSPWRFHDADGRLVEVVLPSRLRCDSAEVLLEAAIGGMGLARLPAWLAADALAAGTLVRVFEEPRPFGFALNVIRSRSRYLPHKTRVVVDWLAEHLPPLLAAR	1	14117	15030	14	NA	NA	NA	no_plot	543728	Variovorax paradoxus S110	TRUE	543728	Variovorax paradoxus S110	34073	Variovorax paradoxus	34072	Variovorax	80864	Comamonadaceae	80840	Burkholderiales	28216	Betaproteobacteria	1224	Proteobacteria	2	Bacteria	131567	cellular organisms
15	NC_012791.1[5348799..5364039]	Variovorax paradoxus S110	543728	PepSY domain-containing protein_-1	PepSY domain-containing protein	PepSY domain-containing protein	WP_015867776.1	15#WP_015867776.1#NC_012791.1[5348799..5364039]	NA	-1	405	MALLRQIWFQIHWFIGITVGSVLVVIGLSGAVLSFRAEIVDALNPTLRHIPNPAGALALRPAALAAQVQAAQPAQRIAALTVFAEPGRPARVNFAPPEGQRQGEVRLIDPWTGALLPVPTGEAFFEFAEHLHRWLLLPRDAGKPVTGTLAAGLLILALSGLYLRWPLAWRAWLKLDFALTGRAFLWNLHAVAGTLALLVYLVSSLTGIYWGFDAVRAMVDNAAGEGRVVRAQGMQAGGAPAKAQAAPDLQRVWQSFLDETGGDWSLATLRPPARNASQMEVTYLRAHPEHERARNRLYLDAATGEPSRHQRYADKPLAGRLVNSIYPMHMGTYWGLPGRIVMLLGSLGLALFAVTGWMLYLGRRRTKRAVREERTRLGPALRPDGPGAEPVLLAFASQT…	1	0	405	1	NA	NA	NA	no_plot	543728	Variovorax paradoxus S110	TRUE	543728	Variovorax paradoxus S110	34073	Variovorax paradoxus	34072	Variovorax	80864	Comamonadaceae	80840	Burkholderiales	28216	Betaproteobacteria	1224	Proteobacteria	2	Bacteria	131567	cellular organisms
16	NC_012791.1[5348799..5364039]	Variovorax paradoxus S110	543728	TonB-dependent siderophore receptor_-1	TonB-dependent siderophore receptor	TonB-dependent siderophore receptor	WP_015867777.1	16#WP_015867777.1#NC_012791.1[5348799..5364039]	NA	-1	2127	MHKFFLATPLALAGAFSHAQTTEPAADPAAEARGQLGTVTVESSATTGFVANTVEAGTFRGAGIMDVPATVNTVTREVLELQGAASIYEALRNTAGVTRQQNGGDTFDQLVIRGIAVENRTNYRLNGSLAIPNVSEIPMENKERVEVLKGASALYYGFTTPAGIVNLVTKRAGSTPVSTVGLTLDDRGSAQALVDLGRQFGDQKQYGLRINAAGGRIGSNIDGVDGHRRFVSAAFDWRVNSRLTLKADVENYRKRITEQAGITRLAAVNGVIALLALPNPDKLLGPPWAVFDAEVTNTQLRADYSLGGNWALTVEAGHSEAERDRRLASFSNYNVLTGAGRITGNDQSLKQTSDLLRTELFGTFSTGSVQHELTLGAARSKKTQDPIFQRNYGGAGTVQ…	0	457	2584	2	NA	NA	NA	no_plot	543728	Variovorax paradoxus S110	TRUE	543728	Variovorax paradoxus S110	34073	Variovorax paradoxus	34072	Variovorax	80864	Comamonadaceae	80840	Burkholderiales	28216	Betaproteobacteria	1224	Proteobacteria	2	Bacteria	131567	cellular organisms
17	NC_012791.1[5348799..5364039]	Variovorax paradoxus S110	543728	thiamine pyrophosphate-dependent dehydrogenase E1 component subunit alpha_1	thiamine pyrophosphate-dependent dehydrogenase E1 component subunit alpha	thiamine pyrophosphate-dependent dehydrogenase E1 component subunit alpha	WP_015867778.1	17#WP_015867778.1#NC_012791.1[5348799..5364039]	NA	1	1014	MDPSNSGTALYRAMVRIRAFENAAEAASQGGVSAYGQQAAGAAKVRGPLHLSTGQEAVPAGVCAHLRTSDYLTSTHRGHGHTLAKGADLARMMCELFGKATGFNGGKGGSMHIADFSVGMLGANGVVAAGLPIAVGAAHAQKLLRKNNDITVCFFGDGAINRGPFLEALNWARVYGLPVLFVCEDNRWSATTASGPMTAGDGASARAASMDIAATQVDGNDVFAVHETAARLVAEVRGGGGPRLLHALTYRVKGHVSVDLAAYRDPAELAAALETDPIARARGQLLDMGVDAATLDAIENAARDEVDTALAVADAAPWPEASAAFTDVQTTGAGQWY	0	2796	3810	3	NA	NA	NA	no_plot	543728	Variovorax paradoxus S110	TRUE	543728	Variovorax paradoxus S110	34073	Variovorax paradoxus	34072	Variovorax	80864	Comamonadaceae	80840	Burkholderiales	28216	Betaproteobacteria	1224	Proteobacteria	2	Bacteria	131567	cellular organisms
18	NC_012791.1[5348799..5364039]	Variovorax paradoxus S110	543728	TPP-dependent acetoin dehydrogenase complex, E1 protein subunit beta_1	TPP-dependent acetoin dehydrogenase complex, E1 protein subunit beta	TPP-dependent acetoin dehydrogenase complex, E1 protein subunit beta	WP_015867779.1	18#WP_015867779.1#NC_012791.1[5348799..5364039]	NA	1	963	MVLKDLSYSEAAVLAIQREMQADPRVVVLGEDVGRGGIFGQYKGLQLAFGDERVIDTPISEAAIMGAGVGMALAGLRPVVEMRVVDFALCGMDELVNQAAKNRFMFGGQGRVPLVARMPGGIWDASAAQHSQSLEAWFAHLPGLVVVSPSTPQDNYGLLRAALACGDPVVYIEHKTLWGLRGEVDEDIAVPLGKARRVREGNALTLVSWSRQMQACAAACDALAAEGIAVDLIDLRTLWPWDRETVLASCARTGRLLVVHEAVQVAGFGAEIAASAAEATGCRVARLGAPRIPVGYAPVLEAQSRVGAEAIAAAARKLLG	0	3800	4763	4	NA	NA	NA	no_plot	543728	Variovorax paradoxus S110	TRUE	543728	Variovorax paradoxus S110	34073	Variovorax paradoxus	34072	Variovorax	80864	Comamonadaceae	80840	Burkholderiales	28216	Betaproteobacteria	1224	Proteobacteria	2	Bacteria	131567	cellular organisms
19	NC_012791.1[5348799..5364039]	Variovorax paradoxus S110	543728	winged helix-turn-helix transcriptional regulator_1	winged helix-turn-helix transcriptional regulator	winged helix-turn-helix transcriptional regulator	WP_015867780.1	19#WP_015867780.1#NC_012791.1[5348799..5364039]	NA	1	423	MDPLFFKLVRVVNLTARPFHEKVGREHHLTLNEWRAMAVLGAQPGLNATQIADLTGLDKMAVSRALAGLKRHKRVQLLGDPTDRRRSRLYLTAAGKALHETVGMLGRQREAALFEGIAADELARLDATLDKLVAAVQRAG	0	4776	5199	5	NA	NA	NA	no_plot	543728	Variovorax paradoxus S110	TRUE	543728	Variovorax paradoxus S110	34073	Variovorax paradoxus	34072	Variovorax	80864	Comamonadaceae	80840	Burkholderiales	28216	Betaproteobacteria	1224	Proteobacteria	2	Bacteria	131567	cellular organisms
20	NC_012791.1[5348799..5364039]	Variovorax paradoxus S110	543728	SDR family oxidoreductase_-1	SDR family oxidoreductase	SDR family oxidoreductase	WP_015867781.1	20#WP_015867781.1#NC_012791.1[5348799..5364039]	NA	-1	762	MALSKSTSPVLAGKVAFVTGGSRGIGAAIVRRLAEDGAAVAFSYASSSAPADELVRSLEAEGGRALALKIDSADAAALTAGIDEAARKLGRIDVLVNNAGVFLPGTIDDFSLEDFDRTLDINVRAVFVAAKAAVRHMGEGGRIINIGSTNAERMPWPGGSAYAMSKSALKGLVQGLSRDLGPRGITVNNVQPGPVNTDMNPVDGPNAAAMHGLMALARHARPEEIAGMVAYLASPEAAFVTGASLNIDGGFAA	0	5202	5964	6	NA	NA	NA	no_plot	543728	Variovorax paradoxus S110	TRUE	543728	Variovorax paradoxus S110	34073	Variovorax paradoxus	34072	Variovorax	80864	Comamonadaceae	80840	Burkholderiales	28216	Betaproteobacteria	1224	Proteobacteria	2	Bacteria	131567	cellular organisms
21	NC_012791.1[5348799..5364039]	Variovorax paradoxus S110	543728	LysR family transcriptional regulator_1	LysR family transcriptional regulator	LysR family transcriptional regulator	WP_015867782.1	21#WP_015867782.1#NC_012791.1[5348799..5364039]	NA	1	927	MEPLNHLQSFVQSAESGSFSAAARRLGLTPAAVSKNVARLEARLGVRLFQRSTRRLTLTEGGERFLGQIGGALATLQDAVAGLSKDDGQPAGTLKVSMGQAFGREHVLPMMGDFLARYPSILPDWHFDNQQVDLVGEGFDAAIGGGIELSPGVVARELARIHVVAVAAPAYLAGRALPTQPAELAQLDALLRRSSPTGRLRSWTLQHAGGDQATVELPRPRAIFNDPEAIAHAALMGLGVAMLPMPFVERGLRSGELVRLLPEWHFDAGAVWLYYPSKKLLPAKTRVFIDFVLERFRSERFAERMQVG	0	6080	7007	7	NA	NA	NA	no_plot	543728	Variovorax paradoxus S110	TRUE	543728	Variovorax paradoxus S110	34073	Variovorax paradoxus	34072	Variovorax	80864	Comamonadaceae	80840	Burkholderiales	28216	Betaproteobacteria	1224	Proteobacteria	2	Bacteria	131567	cellular organisms
22	NC_012791.1[5348799..5364039]	Variovorax paradoxus S110	543728	tripartite tricarboxylate transporter substrate binding protein_1	tripartite tricarboxylate transporter substrate binding protein	tripartite tricarboxylate transporter substrate binding protein	WP_015867783.1	22#WP_015867783.1#NC_012791.1[5348799..5364039]	NA	1	1020	MTSSSNFKTNRRAALAVSAAAIALAATPSWAQSTWPTKPVRIVVPFAAGGTTDILARAVAPELSKAFGQQFIVDNRAGAGGNVGAEIVARAPNDGYTLLMGTVGTHGINRALYPKLPFDPIKDFVPITLVAAVPNVMEMNADKAKALNIHNVQDFIKYAKANPGKLNMASSGSGTSIHLAGELFKSMTGTFMAHIPYKGSGPALLDMVGGNADVMFDNLPSSMAQIKGGKLTALAVTSAKRSPALPDIPTVEEAGGPSLKGFEASSWFGLLAPAGTSPEIVNRIQQEVAKSLGTPAIKEKMLAQGAIPSGNSPADFAKLIASEHVKWAKVVKDSGAKVD	0	7070	8090	8	tph_c	NA	NA	no_plot	543728	Variovorax paradoxus S110	TRUE	543728	Variovorax paradoxus S110	34073	Variovorax paradoxus	34072	Variovorax	80864	Comamonadaceae	80840	Burkholderiales	28216	Betaproteobacteria	1224	Proteobacteria	2	Bacteria	131567	cellular organisms
23	NC_012791.1[5348799..5364039]	Variovorax paradoxus S110	543728	DUF1840 domain-containing protein_-1	DUF1840 domain-containing protein	DUF1840 domain-containing protein	WP_015867784.1	23#WP_015867784.1#NC_012791.1[5348799..5364039]	NA	-1	324	MLYRFQSRASPDFVMLEVHARQLFDIIGKAPAPQGIVTVEQIPGAIAALESALAREASNPHNHDDYAVEGHANEAEKQHVGLHQRAAPLLHMLRDSLAEKKDVTWKT	0	8202	8526	9	NA	NA	NA	no_plot	543728	Variovorax paradoxus S110	TRUE	543728	Variovorax paradoxus S110	34073	Variovorax paradoxus	34072	Variovorax	80864	Comamonadaceae	80840	Burkholderiales	28216	Betaproteobacteria	1224	Proteobacteria	2	Bacteria	131567	cellular organisms
24	NC_012791.1[5348799..5364039]	Variovorax paradoxus S110	543728	class I SAM-dependent methyltransferase_-1	class I SAM-dependent methyltransferase	class I SAM-dependent methyltransferase	WP_015867785.1	24#WP_015867785.1#NC_012791.1[5348799..5364039]	NA	-1	1269	MQSLIPKIESQLASLPVPIALELPDGRRVAKPGSRVTLAFSEWSALAKLAAHQVGAIGEAYVEGRVQIEGAMRDLIDATVGMLPGNPAETNTTWWTRLMRLAKSHSSHSLHKDAEQIQFHYDVSDDFYALWLDPRRVYSCAYFRTPGLTLAQAQEAKLDHICRKLMLQPGERFLDIGSGWGGLLLWAAEHYGVDATGITLSKNQHAHVQRLIQEKGLQGRVRVELRDYRELSADAPFDKIASVGMFEHVGAANMPTYFRKIHSLLKPGGLVLNHGITSGQLDYRQLGAGMGDFIEKYIFPGGELLHVTHVLRETAAAGLEMVDTESLRPHYARTLWAWSDALESQLDTAREVLARAGGRQGENAERILRAYRLYLAGSAMSFEQGWISLHQMLSTKPDG…	0	8538	9807	10	NA	NA	NA	no_plot	543728	Variovorax paradoxus S110	TRUE	543728	Variovorax paradoxus S110	34073	Variovorax paradoxus	34072	Variovorax	80864	Comamonadaceae	80840	Burkholderiales	28216	Betaproteobacteria	1224	Proteobacteria	2	Bacteria	131567	cellular organisms
25	NC_012791.1[5348799..5364039]	Variovorax paradoxus S110	543728	bifunctional salicylyl-CoA 5-hydroxylase/oxidoreductase_1	bifunctional salicylyl-CoA 5-hydroxylase/oxidoreductase	bifunctional salicylyl-CoA 5-hydroxylase/oxidoreductase	WP_041945573.1	25#WP_041945573.1#NC_012791.1[5348799..5364039]	NA	1	2388	MNSLSTGSPAAPAMDLQRILCIGGGPAGLYFALLMKARNPALEITVVERNRPFDTFGWGVVLSDQTLANLRAADAETAALIGSEFHHWDDIQVFFKGRQVRSGGHGFCGIGRKRLLNILQERCLALGVKLVFETDATDDQAIAAQYNADLVIASDGLNSRIRQRYADVFKPDVDLRNCRFVWLGTHQTFDAFTFAFEQTEHGWFQAHAYQFDDKTSTFIVETPEAVWKAHGLDQMEQPEAIAFCEKLFAKYLGGHSLISNATHLRGSANWIRFPRVVCERWTHRIDVEGRSVPVVLMGDAAHTAHFSIGSGTKLALEDAIDLANEFAQGGTVDHVLEGYEARRSVEVLKIQNAARNSTEWFENVPRYTGMQIEQFAYSLLTRSQRISHENLRVRDTQWL…	0	9923	12311	11	NA	NA	NA	no_plot	543728	Variovorax paradoxus S110	TRUE	543728	Variovorax paradoxus S110	34073	Variovorax paradoxus	34072	Variovorax	80864	Comamonadaceae	80840	Burkholderiales	28216	Betaproteobacteria	1224	Proteobacteria	2	Bacteria	131567	cellular organisms
26	NC_012791.1[5348799..5364039]	Variovorax paradoxus S110	543728	MarR family transcriptional regulator_1	MarR family transcriptional regulator	MarR family transcriptional regulator	WP_015867787.1	26#WP_015867787.1#NC_012791.1[5348799..5364039]	NA	1	477	MDLEARAHSEHPEALRLWLRLLTCTQLIEKQVRNELRSQFATTLPRFDLMSQLERSPDGLKMNELSRRMMVTGGNVTGITDQLVTEGLVERINVEGDRRAWRVRLTARGRKLFNEMAQQHEDWIVDAFAALSAKEIAQLHKLLGKVKQHSHSQMAEAE	0	12312	12789	12	NA	NA	NA	no_plot	543728	Variovorax paradoxus S110	TRUE	543728	Variovorax paradoxus S110	34073	Variovorax paradoxus	34072	Variovorax	80864	Comamonadaceae	80840	Burkholderiales	28216	Betaproteobacteria	1224	Proteobacteria	2	Bacteria	131567	cellular organisms
27	NC_012791.1[5348799..5364039]	Variovorax paradoxus S110	543728	enoyl-CoA hydratase family protein_1	enoyl-CoA hydratase family protein	enoyl-CoA hydratase family protein	WP_015867788.1	27#WP_015867788.1#NC_012791.1[5348799..5364039]	NA	1	855	MKHYIGAGNPMHAQFEAKAPYVAKHFAWHYEAGVGTITLNRPERKNPLTFDSYAELRDLFRALTYATDVKAIVVTGAGGNFCSGGDVHEIIGPLTGMRMPELLEFTRMTGDLVKAIRHCPQPIVGAIDGVCAGAGAMIALACDLRYGSPATRTAFLFTRVGLAGADMGACALLPRVIGQGRASELLFTGRAMTAQEGQAWGFFNALHESDALLEAATKVARELAEGPSFAHGMTKTMLSQEWSMTIDQAIEAEAQAQAICMQTEDFKRAYEAFAAKRKPVFGGD	0	12785	13640	13	NA	NA	NA	no_plot	543728	Variovorax paradoxus S110	TRUE	543728	Variovorax paradoxus S110	34073	Variovorax paradoxus	34072	Variovorax	80864	Comamonadaceae	80840	Burkholderiales	28216	Betaproteobacteria	1224	Proteobacteria	2	Bacteria	131567	cellular organisms
28	NC_012791.1[5348799..5364039]	Variovorax paradoxus S110	543728	acyl-CoA dehydrogenase family protein_1	acyl-CoA dehydrogenase family protein	acyl-CoA dehydrogenase family protein	WP_015867789.1	28#WP_015867789.1#NC_012791.1[5348799..5364039]	NA	1	1194	MMAKIPAPPSTTHLALPFFDDAHRALASELLPWCAAQEVDERDDRAACREWVRRLGDGGWLRYAVPGSAGGALERLDSRALVLLRETLGYHSPLADFAFAMQGLGSGAITLAGTPEQQSHYLTAVGKGEKIAAFALSEPDAGSDVAAMAMRAEATPDGWRLNGEKTWISNGGIADFYCLFAKTDPTGGTRGITVFIVDATTPGLDTSEHIDVMAPHPLATLRFQDCIVPRAAQLGELNGGFKLAMRTLDIFRASVAAAALGMGRRALAEAIAHAKGRRMFGQTLADFQLTQAKLGEMAALIDSAALLTYRAAWMRDDAEQRGAPAVGDVSAAAAMAKMCATENASRVIDMALQMHGGLGVKVGTKIESLYRDIRSLRIYEGATEVQQLIIGKSVLRG	0	13643	14837	14	NA	NA	NA	no_plot	543728	Variovorax paradoxus S110	TRUE	543728	Variovorax paradoxus S110	34073	Variovorax paradoxus	34072	Variovorax	80864	Comamonadaceae	80840	Burkholderiales	28216	Betaproteobacteria	1224	Proteobacteria	2	Bacteria	131567	cellular organisms
29	NC_012791.1[5348799..5364039]	Variovorax paradoxus S110	543728	AMP-binding protein_1	AMP-binding protein	AMP-binding protein	WP_015867790.1	29#WP_015867790.1#NC_012791.1[5348799..5364039]	NA	1	399	MSAQVDRFVHDRLPPAEQLPVFRYDLPELQLPDQLNLVEELLDKAPAKGFGDKPMLRSPAGALTYSQAAVEVNRIAQVLVEDLGLVPGNRVLLRGGNSVAMALSWLAVVKAGLIAVATMPLLRAKELGEIIEKARPVAALCDGRLLDELVLAQREHPVLASVIAFNKPDAPDSLSARAAGKSGVFTACPTASDDIALLAFTSGTTGKPKAPVTTHRDVLAMCQTWPRHVLRARSDDIVIGSPPLAFTFGLGGLLVFPMWAGASVYFADAPFTPEGLVKLINEVGATICYTAPTFYRQMAPFVRQHGAPSLRICVSAGEALPDATRQLWKEATGIEMLDGIGGTEVFHIYISAAGDQVRRGAVGKVVPGFTAKVVDDQGNEVPRGTVGKLALQGPVGCRY…	1	14842	15241	15	NA	NA	NA	no_plot	543728	Variovorax paradoxus S110	TRUE	543728	Variovorax paradoxus S110	34073	Variovorax paradoxus	34072	Variovorax	80864	Comamonadaceae	80840	Burkholderiales	28216	Betaproteobacteria	1224	Proteobacteria	2	Bacteria	131567	cellular organisms
30	NC_013446.2[1681279..1696668]	Comamonas thiooxydans	363952	Gfo/Idh/MocA family oxidoreductase_-1	Gfo/Idh/MocA family oxidoreductase	Gfo/Idh/MocA family oxidoreductase	WP_029158425.1	30#WP_029158425.1#NC_013446.2[1681279..1696668]	NA	-1	791	MEQRRLRIGVAGLGRAFSLMLPTFLQDPRVQLVAACDPREEARQQFAADFNARTYTDVQDLAEDPNVEAIYVASPHQFHAQHTEIAAARGKHVLVEKPMALNAADCDRMIAACRAANVHLIVGHCHSFDTPYRRTRELIRSGDFGAVKMIQAFNYTDYLYRPRRPEELMTAEGGGAVFSQAAHQVDIVRMLASSRATRLRASVGRWDPLRPTEGAYSALIWFENGAYASLSYNGYGHFNSDEWTGWIGEMGDHLNPDAYGSARKRLATIASAEDEAKLKAAGTYGGAAYKQPSWAAEEPARSHQHFGPVIVSCERADLRPLPDSVVVYGDKQRETLALSRPTVPRAEVIDELYDAVILGQAPLHDGEWAKGTLEICIAILKSSETGTDVLL	1	0	791	1	NA	1	5'H	no_plot	363952	Comamonas thiooxydans	TRUE	NA	NA	363952	Comamonas thiooxydans	283	Comamonas	80864	Comamonadaceae	80840	Burkholderiales	28216	Betaproteobacteria	1224	Proteobacteria	2	Bacteria	131567	cellular organisms
31	NC_013446.2[1681279..1696668]	Comamonas thiooxydans	363952	Rieske 2Fe-2S domain-containing protein_-1	Rieske 2Fe-2S domain-containing protein	Rieske 2Fe-2S domain-containing protein	WP_012837653.1	31#WP_012837653.1#NC_013446.2[1681279..1696668]	NA	-1	1332	MLTHEENELLCRVEGEAPMGKLMREHWTPICLIEEVREPDGTPVKARILGEDLVVFRDSEGRVGVVGEYCPHRRASLVYGRNEDGGLRCLYHGWKFDVQGNVLEMVSEPAASSMAEKVKHTAYPTKEWGGMVWAYMGAQDAIPEFVAPAWAPTADTRVSIGKVLLPCNWAQILEGAIDSAHSSSLHSSDFVPARVTGAEATDNNWLRPSTDKAPRLQVQRTEYGFRYAALRRPIFNASTHDYVRSTVFVAPGTVLIPPNNLYNVANVNVPMDDTNTVFYFIAWGDAATTPETETWRKFLHTQVGPDLDERYRPLRNHENRFWQDRQAMKAGNFTGITGFPNQDIAMWVTMGPIANRSDERLGASDLAIVEFRRRMLDAIAEYKQDGKAIGTGAKTIPGT…	0	810	2142	2	NA	1	5'H	no_plot	363952	Comamonas thiooxydans	TRUE	NA	NA	363952	Comamonas thiooxydans	283	Comamonas	80864	Comamonadaceae	80840	Burkholderiales	28216	Betaproteobacteria	1224	Proteobacteria	2	Bacteria	131567	cellular organisms
32	NC_013446.2[1681279..1696668]	Comamonas thiooxydans	363952	IS3 family transposase_-1	IS3 family transposase	IS3 family transposase	WP_012837654.1	32#WP_012837654.1#NC_013446.2[1681279..1696668]	NA	-1	1539	MYSYADRIRAVELYIKLGLRVRATIRQLGYPTKNALKGWYQHYLKHQDLPASQAPRAPKYSLQQRQVAVAHYLAHDRCIAATMRVLGYPGRGTLTAWVRQDCPEISKSMVGRSWPTTKPDALMCEGVVQLCTRQSTAQEIAVKFGVCRGTLYNWKNQLLGPCAPTSMKHSPKRSPVLDAAALRRQVESLRQDIRRLKIERELLKQAHEVLKNGAGIDLHRLANKDKAVLVEALRGQYELPELLSLVGLARSSYFYHRARLKLADKYLDVRRSITEIFDNNYRCYGYRRVQASLLKECTGISEKVVRRLMKQEGLIVAKPKRRRYNSYLGEIGAAPQNLINRDFRAAAPNEKWLTDITEFQIPAGKVYLSPVIDCFDGLVVSWSIGTHPNAHLVNTMLDA…	0	3084	4623	3	transposase	1	5'H	plot	363952	Comamonas thiooxydans	TRUE	NA	NA	363952	Comamonas thiooxydans	283	Comamonas	80864	Comamonadaceae	80840	Burkholderiales	28216	Betaproteobacteria	1224	Proteobacteria	2	Bacteria	131567	cellular organisms
33	NC_013446.2[1681279..1696668]	Comamonas thiooxydans	363952	IS110 family transposase_-1	IS110 family transposase	IS110 family transposase	WP_050881040.1	33#WP_050881040.1#NC_013446.2[1681279..1696668]	NA	-1	1023	MQVIGLDIAKSVFQLHTVDMSTGEIVNVQLKRAKVLGHFANRAPCLIGIEACGGAHHWARELTAQGHAVRLIHAKAVRPFVNGNKTDATDARAIWLAIQQPGTKFVGVKTLAQQATLTLHRQREMLMRMKIMQINALRGLLYEFGATLARGKKALLGELELALEALANSIPQYVVDSLREQAQRIKQLAIDIKAIEVRLAEVLRIDVDMKRVAAIPGVGLLSATAAIATMGEAKAFKSGREFCAWLGLVPKQRGTGGRVNLLGISKRGDTYLRTLLIHGARAVLRHAKEPGPWLEQLQARRPTNVVIVAQAAKMARTIWAVTARQQDYQRGHQSTRPLGA	0	4921	5944	4	transposase	1	5'H	plot	363952	Comamonas thiooxydans	TRUE	NA	NA	363952	Comamonas thiooxydans	283	Comamonas	80864	Comamonadaceae	80840	Burkholderiales	28216	Betaproteobacteria	1224	Proteobacteria	2	Bacteria	131567	cellular organisms
34	NC_013446.2[1681279..1696668]	Comamonas thiooxydans	363952	helix-turn-helix domain-containing protein_-1	helix-turn-helix domain-containing protein	helix-turn-helix domain-containing protein	WP_012837656.1	34#WP_012837656.1#NC_013446.2[1681279..1696668]	100	-1	768	MQDKNFVESLRKGLGVLTCFDRRHTRLTLSEVARLTQSTPASARRSLSTLVQLGYLESDGKLFWMQPKSLLIAYSFLSSRPMPALAQPLLDALSERTRESASLGTLLEDDAIIIGRSTARRSLSTGLGIGSRLPVYCSAIGRMLLSGLPQQEARARLEMIERVALTPHTVTDLEELLGLLETCRQSGWSCSDGELELGVRSMAAPVRDPQGNTIAAMSIAVRAERLSMSEFKETFLIPLKRARNELEKKLYPQGL	0	6414	7182	5	tph_r	1	5'H	plot	363952	Comamonas thiooxydans	TRUE	NA	NA	363952	Comamonas thiooxydans	283	Comamonas	80864	Comamonadaceae	80840	Burkholderiales	28216	Betaproteobacteria	1224	Proteobacteria	2	Bacteria	131567	cellular organisms
35	NC_013446.2[1681279..1696668]	Comamonas thiooxydans	363952	tripartite tricarboxylate transporter substrate binding protein_1	tripartite tricarboxylate transporter substrate binding protein	tripartite tricarboxylate transporter substrate binding protein	WP_012837657.1	35#WP_012837657.1#NC_013446.2[1681279..1696668]	98	1	969	MRNESIRRREALIGIAAAVAATGSLAQSNQPLKIVVPFSAGGTADVLPRLVAEKIRADYAGGVIIENKPGAGGNIGADLVFRAPPDGMTVLASPPGPIAINHNLYQKLSFDPTRWVPVTILATVPNVLVINPKLPVKSLGEFIAYAKANPKKVTVATQGDGSTSHLTAAMFMQLTGAELTVVPYKGTAPALIDLIGGNVDVFFDNISSSATYHHAGKVRILAVADEQRSQILPQVPTFAEQQWPAMQAVTFFSVVAPPGTSAEIAQKLQRQMAQALSSNDIRKHFQEQGAVPCGWDPTKTAQFIRQETEKWKKVLKAANVKL	0	7291	8260	6	tph_c	1	5'H	plot	363952	Comamonas thiooxydans	TRUE	NA	NA	363952	Comamonas thiooxydans	283	Comamonas	80864	Comamonadaceae	80840	Burkholderiales	28216	Betaproteobacteria	1224	Proteobacteria	2	Bacteria	131567	cellular organisms
36	NC_013446.2[1681279..1696668]	Comamonas thiooxydans	363952	Rieske 2Fe-2S domain-containing protein_1	Rieske 2Fe-2S domain-containing protein	Rieske 2Fe-2S domain-containing protein	WP_012837658.1	36#WP_012837658.1#NC_013446.2[1681279..1696668]	99	1	1242	MQESIIQWRGATNTRVPFGIYTDTANADQEQQRIYRGEVWNYLCLESEIPEAGDFRTTFVGETPIVVVRDADQEIYAFENRCAHRGALIALEKSGRTDSFQCVYHAWSYNRQGDLTGVAFEKGVKGQGGMPASFCKEEHGPRKLRVAVFCGLVFGSFSEDVSSIEDYLGPEICERIERVLHKPVEVIGRFTQKLPNNWKLYFENVKDSYHASLLHMFFTTFELNRLSQKGGVIVDESGGHHVSYSMIDRGAKDDSYKDQAIRSDNERYRLKDPSLLEGFEEFEDGVTLQILSVFPGFVLQQIQNSIAVRQLLPKSISSSELNWTYLGYADDSTEQRKVRLKQANLIGPAGFISMEDGAVGGFVQRGIAGAANLDAVIEMGGDHEGSSEGRATETSVRGF…	0	8275	9517	7	tph_a2	1	5'H	plot	363952	Comamonas thiooxydans	TRUE	NA	NA	363952	Comamonas thiooxydans	283	Comamonas	80864	Comamonadaceae	80840	Burkholderiales	28216	Betaproteobacteria	1224	Proteobacteria	2	Bacteria	131567	cellular organisms
37	NC_013446.2[1681279..1696668]	Comamonas thiooxydans	363952	Terephthalate 1 2-dioxygenase terminal oxygenase component subunit beta 1_1	Terephthalate 1 2-dioxygenase terminal oxygenase component subunit beta 1	Terephthalate 1 2-dioxygenase terminal oxygenase component subunit beta 1	WP_012837659.1	37#WP_012837659.1#NC_013446.2[1681279..1696668]	98	1	465	MINEIQIAAFNAAYAKTVDSDAMEQWPTFFTKDCHYRVTNVDNHAEGLAAGIVWADSQDMLTDRISALREANIYERHRYRHILGLPSIQSGDATQASASTPFMVLRIMHTGETEVFASGEYLDKFTTIDGKLRLQERIAVCDSTVTDTLMALPL	0	9513	9978	8	tph_a3	1	5'H	plot	363952	Comamonas thiooxydans	TRUE	NA	NA	363952	Comamonas thiooxydans	283	Comamonas	80864	Comamonadaceae	80840	Burkholderiales	28216	Betaproteobacteria	1224	Proteobacteria	2	Bacteria	131567	cellular organisms
38	NC_013446.2[1681279..1696668]	Comamonas thiooxydans	363952	4-hydroxythreonine-4-phosphate dehydrogenase PdxA_1	4-hydroxythreonine-4-phosphate dehydrogenase PdxA	4-hydroxythreonine-4-phosphate dehydrogenase PdxA	WP_034410981.1	38#WP_034410981.1#NC_013446.2[1681279..1696668]	94	1	948	MTIVHRRLALAIGDPHGIGPEIALKALRQLSANERSLIKVYGPWSALEQAAQICQMESLLQDLIHEEAGSLAQPAQWGEITPQAGLSTVQSATAAIRACENGEVDAVIACPHHETAIHRAGIAFSGYPSLLANVLGMNEDQVFLMLVGAGLRIVHVTLHESVRSALERLSPQLVVNAVQAAVQTCTLLGVPKPQVAVFGINPHASEGQLFGLEDSQITAPAVETLRKCGLAVDGPMGADMVLAQRKHDLYVAMLHDQGHIPIKLLAPNGASALSIGGRVVLSSVGHGSAMDIAGRGVADSTALLRTIALLGAQPG	0	9974	10922	9	tph_b	1	5'H	plot	363952	Comamonas thiooxydans	TRUE	NA	NA	363952	Comamonas thiooxydans	283	Comamonas	80864	Comamonadaceae	80840	Burkholderiales	28216	Betaproteobacteria	1224	Proteobacteria	2	Bacteria	131567	cellular organisms
39	NC_013446.2[1681279..1696668]	Comamonas thiooxydans	363952	2Fe-2S iron-sulfur cluster binding domain-containing protein_1	2Fe-2S iron-sulfur cluster binding domain-containing protein	2Fe-2S iron-sulfur cluster binding domain-containing protein	WP_012837661.1	39#WP_012837661.1#NC_013446.2[1681279..1696668]	97	1	1011	MNHQIHIHDSDIAFPCAPGQSVLDAALQAGIELPYSCRKGSCGNCASALLDGNITSFNGMAVRSELCTSEQVLLCGCTAASDIRIQPSSFRRLDPEARKRFTAKVYSNTLAAPDVSLLRLRLPVGKRAKFEAGQYLLIHLDDGESRSYSMANPPHESDGITLHVRHVPGGRFSTIVQQLKSGDTLEIELPFGSIALKPDDTRPLICVAGGTGFAPIKSVLDDLAKRKVQRDITLIWGARNPSGLYLPSAIDKWRKTWPQFRYIAAITDLGNVPADAHAGRVDDALRTHFGNLHDHVVHCCGSPALVQSVRTAASDMGLLAQDFHADVFATGPTGHH	0	10931	11942	10	tph_a1	1	5'H	plot	363952	Comamonas thiooxydans	TRUE	NA	NA	363952	Comamonas thiooxydans	283	Comamonas	80864	Comamonadaceae	80840	Burkholderiales	28216	Betaproteobacteria	1224	Proteobacteria	2	Bacteria	131567	cellular organisms
40	NC_013446.2[1681279..1696668]	Comamonas thiooxydans	363952	DDE-type integrase/transposase/recombinase_-1	DDE-type integrase/transposase/recombinase	DDE-type integrase/transposase/recombinase	WP_012837662.1	40#WP_012837662.1#NC_013446.2[1681279..1696668]	NA	-1	579	MAKALNERWATDMCRVWAGRAGWTTMALVIDCHSRELLGWNLSRSGRSKTAESALEQVLIARFGTLGRVPAPFLLLSDNGLVFTSRSSTALVRSYGLRHEESLAESLASLVLARSSYLYHRARLNADEKYVLVCRSITNIFERNHGCFGYRRVTATLCSSMAEPVNHKRVQRGSKFVGNGMNAFITASSPPC	0	11962	12541	11	transposase	1	5'H	plot	363952	Comamonas thiooxydans	TRUE	NA	NA	363952	Comamonas thiooxydans	283	Comamonas	80864	Comamonadaceae	80840	Burkholderiales	28216	Betaproteobacteria	1224	Proteobacteria	2	Bacteria	131567	cellular organisms
41	NC_013446.2[1681279..1696668]	Comamonas thiooxydans	363952	transposase_-1	transposase	transposase	NA	41#NA#NC_013446.2[1681279..1696668]	NA	-1	NA	NA	NA	12821	13121	12	transposase	1	5'H	plot	363952	Comamonas thiooxydans	TRUE	NA	NA	363952	Comamonas thiooxydans	283	Comamonas	80864	Comamonadaceae	80840	Burkholderiales	28216	Betaproteobacteria	1224	Proteobacteria	2	Bacteria	131567	cellular organisms
42	NC_013446.2[1681279..1696668]	Comamonas thiooxydans	363952	hypothetical protein_-1	hypothetical protein	hypothetical protein	WP_123974928.1	42#WP_123974928.1#NC_013446.2[1681279..1696668]	NA	-1	744	MKKRILLCSALSFALTGCNSSPSNSDLEAYLEPKFDSCKNLKIVDIKKTNGYQEDGYYRVEFSYGLELKDSSLLDTMRNQWKEEKEESERRLEKNKKFLETRETLEAEIKKIADEFELHAPYMPSSDEIIVFKRGLSAEIAPEIPLPLQEKINIWKKLVESREQEINNQKPFKIFGNEETIIYRNYYNGCNPSVKQFTKNLFEGQQLASLRSENKDPELLFDEYKVKVTLTIPMRKTENGWRVISDN	0	13726	14470	13	NA	1	5'H	no_plot	363952	Comamonas thiooxydans	TRUE	NA	NA	363952	Comamonas thiooxydans	283	Comamonas	80864	Comamonadaceae	80840	Burkholderiales	28216	Betaproteobacteria	1224	Proteobacteria	2	Bacteria	131567	cellular organisms
43	NC_013446.2[1681279..1696668]	Comamonas thiooxydans	363952	helix-turn-helix transcriptional regulator_-1	helix-turn-helix transcriptional regulator	helix-turn-helix transcriptional regulator	WP_080571293.1	43#WP_080571293.1#NC_013446.2[1681279..1696668]	NA	-1	324	MTNADRSPVLKAFGQAVRECRSARGFSQEGFAHYCGLDRSYMGGVERGERNVTLVNMERIIAALDMKPSEFFLTLDGHFRDLAVQRDAAHLNDFAPYFRPGIPRKTP	0	14550	14874	14	NA	1	5'H	no_plot	363952	Comamonas thiooxydans	TRUE	NA	NA	363952	Comamonas thiooxydans	283	Comamonas	80864	Comamonadaceae	80840	Burkholderiales	28216	Betaproteobacteria	1224	Proteobacteria	2	Bacteria	131567	cellular organisms
44	NC_013446.2[1681279..1696668]	Comamonas thiooxydans	363952	hypothetical protein_-1	hypothetical protein	hypothetical protein	WP_012837667.1	44#WP_012837667.1#NC_013446.2[1681279..1696668]	NA	-1	398	MIKGLMITPPVIGRISIGKVVEKNGKRLPEKDDEFTITTQVQQRGQWVLHPLDEALRQSQAPGQVSCGIKEGTEPSDVQSETSASATQTRTGKRSLKDKMGVADTPTAAPSTTRRKLRSIPVRVLFNDPDLNLRADYCMFDRSTARPLCVGNGESCKRVTDKGLEELACPGPDTCRFGMGHCKPYGRLNVSIGDSDELGSFVFRTTGFNSIRTLAARLQYFAAVSGGNLACMPLELKLRGKSTTQSHRSAIYYADLVVRTGASLNEAIGQAHTLAAERLAAGFDQSALDGAARQGFANGNFEDAPDEGVEIVEEFYPEECETPTAPTTAAANEHWPPIAQASQRNGTHSPYPQKQWL	1	14992	15390	15	NA	1	5'H	no_plot	363952	Comamonas thiooxydans	TRUE	NA	NA	363952	Comamonas thiooxydans	283	Comamonas	80864	Comamonadaceae	80840	Burkholderiales	28216	Betaproteobacteria	1224	Proteobacteria	2	Bacteria	131567	cellular organisms
45	NZ_AGUF01000033.1[1174..16417]	Achromobacter arsenitoxydans SY8	477184	diaminopimelate decarboxylase_1	diaminopimelate decarboxylase	diaminopimelate decarboxylase	WP_008160543.1	45#WP_008160543.1#NZ_AGUF01000033.1[1174..16417]	NA	1	1133	MAFDPRQLTQLAAQHGTPLWVYDAAVIRDRIAQLRRFDTIRYAQKACSNLHILRLMRSEGVVVDAVSLGEIERSLAAGFQPRSEPEGIVFTADLIDHATLATVLKHGITVNAGSLDMLARVGQASPGHRVWLRINPGFGHGHSNKTNTGGPQSKHGIWIDDVAEAVSIVRRHGLKLVGIHMHIGSGVDYGHLSSVCDAMVDVVKSLDHDIEAISAGGGLSIPYRDGEPRIDCDHYFEQWDAARKRIAAHLGHDIRLEIEPGRFLVAESGVLVSEVHSINRRPERDFALVDAGFNDLMRPAMYGSYHRISVHAPDGSEPQGAQTRIAVAGPLCESGDVFTQNEGGVMSDQMLPQPRIGDFLVLHNAGAYGSSMSSNYNSRPLAPEVLLDKGEARVIRRRQ…	1	0	1133	1	NA	NA	NA	no_plot	477184	Achromobacter arsenitoxydans SY8	TRUE	477184	Achromobacter arsenitoxydans SY8	1147684	Achromobacter arsenitoxydans	222	Achromobacter	506	Alcaligenaceae	80840	Burkholderiales	28216	Betaproteobacteria	1224	Proteobacteria	2	Bacteria	131567	cellular organisms
46	NZ_AGUF01000033.1[1174..16417]	Achromobacter arsenitoxydans SY8	477184	2-dehydro-3-deoxyglucarate aldolase_-1	2-dehydro-3-deoxyglucarate aldolase	2-dehydro-3-deoxyglucarate aldolase	WP_043517833.1	46#WP_043517833.1#NZ_AGUF01000033.1[1174..16417]	NA	-1	768	MNSPLPNRFRQRILARERLIGFWMCMSSHITAELVGLADFDWLLLDGEHSPNEVPMFLQQLQALQGSASAAVGRPSWNDPVQIKRLLDIGFYNLLIPFIESEEDARRAVAATRYPPQGMRGVAGAQRSNRYGTVPDYLQTINDNICVLLQIESRPGIEAVDEIASVEGVDGVFIGPSDLAAALGHIGNPNHPEVQETIRHLHQRVSAAGKAVGILAPVHADARRYLDMGMHFVAVGTDLGVFKQATFALREAFPT	0	1181	1949	2	NA	NA	NA	no_plot	477184	Achromobacter arsenitoxydans SY8	TRUE	477184	Achromobacter arsenitoxydans SY8	1147684	Achromobacter arsenitoxydans	222	Achromobacter	506	Alcaligenaceae	80840	Burkholderiales	28216	Betaproteobacteria	1224	Proteobacteria	2	Bacteria	131567	cellular organisms
47	NZ_AGUF01000033.1[1174..16417]	Achromobacter arsenitoxydans SY8	477184	dihydroxy-acid dehydratase_-1	dihydroxy-acid dehydratase	dihydroxy-acid dehydratase	WP_008160547.1	47#WP_008160547.1#NZ_AGUF01000033.1[1174..16417]	NA	-1	1746	MSNSDKRRKPEDLRSHRWYGVKDLRSFGHRSRTAQMGYHRSDYAGKPVIAIINTWSDINPCHSHFKQRVEEVKRGIWQAGGFPVEMPAMSLSEPFQKPTTMLYRNLLAMETEELLRSYPADGCVLMGGCDKTTPALVMGAVSMDLPTIFVPAGPMLRGNWNGNTLGSGSDTWKYWAELRAGNITEEDWQGVEDGIARSPGHCMTMGTASTMTSAVEALGLCLSGASSIPAPDSRHAQMASLTGKRIVEMVWEDLKPSDLLTAASYDNAVRTVLALSGSTNAVVHLIAMARRSGFGLDLDRFDHLARTTPVLANLRPAGKYLMEDFYYAGGLRALLVQLGDLLDTSQRTVDGRTLGENIAGARIFNEDVIRPRAQALIERDGLAVLRGNLAPDGAVIKPP…	0	2009	3755	3	NA	NA	NA	no_plot	477184	Achromobacter arsenitoxydans SY8	TRUE	477184	Achromobacter arsenitoxydans SY8	1147684	Achromobacter arsenitoxydans	222	Achromobacter	506	Alcaligenaceae	80840	Burkholderiales	28216	Betaproteobacteria	1224	Proteobacteria	2	Bacteria	131567	cellular organisms
48	NZ_AGUF01000033.1[1174..16417]	Achromobacter arsenitoxydans SY8	477184	Ldh family oxidoreductase_-1	Ldh family oxidoreductase	Ldh family oxidoreductase	WP_193353343.1	48#WP_193353343.1#NZ_AGUF01000033.1[1174..16417]	NA	-1	1083	MPVEQVREQILQVLMAWGMAEDLAHTTAGLMARTDLLGIDSHGISMLPSYEEKWRAGSLRLDARARIVRDGGASALIDGMGGLGYPVAALAMNLAVDKALEHGVGAVSVCNSHHFGAAGVYARIAVERGVVGLVTSSANGVIMVPTRGAMPMLGTNPIAFGAPAAYNEPFLFDMATTTVAANKVKVYDFLGKPLPPGWAVDGQGAAVTDADAAMQFIFKRPEGGLTPLGGTPAMSSHKGYGLAMMAQILGGTLSGSAFAARRAPTRRPGEPDDVGHFFLALNPDAFRAAGSFESDMDDMIDALHDTPPANPEEPVLVAGEPEAAERARRLRAGIPIPAALADRLRGICERAGTPYLLDPA	0	3839	4922	4	NA	NA	NA	no_plot	477184	Achromobacter arsenitoxydans SY8	TRUE	477184	Achromobacter arsenitoxydans SY8	1147684	Achromobacter arsenitoxydans	222	Achromobacter	506	Alcaligenaceae	80840	Burkholderiales	28216	Betaproteobacteria	1224	Proteobacteria	2	Bacteria	131567	cellular organisms
49	NZ_AGUF01000033.1[1174..16417]	Achromobacter arsenitoxydans SY8	477184	FadR family transcriptional regulator_-1	FadR family transcriptional regulator	FadR family transcriptional regulator	WP_008160551.1	49#WP_008160551.1#NZ_AGUF01000033.1[1174..16417]	NA	-1	756	MPQPAPQAPAEPDAPGALVLERGHRVRLADQLYGQIFEQIVSGALNVGDKLPSENEISERSGVSRPVVREALLRLRADGLITAHQGLGTFVSHQPAPRLKTFNDVQNVSAYLRAQEVRVALEGDAARLAALRRTDEQLARIADAHAAFADTLARGQVSAEADLAFHASIAEASGNDFYLGVLESIHESISGFMRLTLNLTRTGSRQRAQRVVDEHATILDAIREQDGERARVAMQFHLGQARHRLVDRDRD	0	5002	5758	5	NA	NA	NA	no_plot	477184	Achromobacter arsenitoxydans SY8	TRUE	477184	Achromobacter arsenitoxydans SY8	1147684	Achromobacter arsenitoxydans	222	Achromobacter	506	Alcaligenaceae	80840	Burkholderiales	28216	Betaproteobacteria	1224	Proteobacteria	2	Bacteria	131567	cellular organisms
50	NZ_AGUF01000033.1[1174..16417]	Achromobacter arsenitoxydans SY8	477184	dihydrodipicolinate synthase family protein_-1	dihydrodipicolinate synthase family protein	dihydrodipicolinate synthase family protein	WP_008160553.1	50#WP_008160553.1#NZ_AGUF01000033.1[1174..16417]	NA	-1	930	MKTTPVTAQDLQRSVIAVPPLARNADLSLNEAANKALLGHLEAGGVRNVMYGGNANFYNVGVSEYARIVDMLAGLAGADTWILPSVGPDYGKMMDQAEILRSRPFPTAMLLPMSFPYTDAGLADGVRRFTDALGKPAVVYIKSADYLAPGTAALLIEEGRIAGFKYAVVRDDPSQDAYLSALLQAVDSRWIVSGIGERPAIVHYRDFGLKSFTSGSVCVAPRGSMRLLHLLRDGRYDEAEAVRQHYLGLEDCRDGISPIRVLHDAVTLAGVADMGPMLPLLTGISSAERERVAPVARALAAWDREAVAA	0	5892	6822	6	NA	NA	NA	no_plot	477184	Achromobacter arsenitoxydans SY8	TRUE	477184	Achromobacter arsenitoxydans SY8	1147684	Achromobacter arsenitoxydans	222	Achromobacter	506	Alcaligenaceae	80840	Burkholderiales	28216	Betaproteobacteria	1224	Proteobacteria	2	Bacteria	131567	cellular organisms
51	NZ_AGUF01000033.1[1174..16417]	Achromobacter arsenitoxydans SY8	477184	tripartite tricarboxylate transporter substrate binding protein_1	tripartite tricarboxylate transporter substrate binding protein	tripartite tricarboxylate transporter substrate binding protein	WP_043517852.1	51#WP_043517852.1#NZ_AGUF01000033.1[1174..16417]	NA	1	1002	MHAAPARGRFIAAALLTATAFILPAAPALADYPDRDVKIIVPFPAGGTADIAARVVAAELGKSWKKSVVVDNKAGAGGNVGSAEAARATPDGYTLLMGTVSTHAINQSVYAKLPYDPVKDFVPVTLVIPVPNILELNPAFADKHGIRTVADLIKYLKANPASVNMASTGNGTSTHLSGELFQTMTGTRMTHVPYKGSSPALTDVMAGSADLIFDNLPSSMGFIKGGKLRPLAVTTASRSPALPDVPTMAEAGVQGYEASSWFGLLAPAGTPADIVQKIQRDVAAALQQESVRAQLQAQGATPSGNTPAQFKQFMAQETVKWADVVKKSGAKVD	0	7044	8046	7	tph_c	NA	NA	no_plot	477184	Achromobacter arsenitoxydans SY8	TRUE	477184	Achromobacter arsenitoxydans SY8	1147684	Achromobacter arsenitoxydans	222	Achromobacter	506	Alcaligenaceae	80840	Burkholderiales	28216	Betaproteobacteria	1224	Proteobacteria	2	Bacteria	131567	cellular organisms
52	NZ_AGUF01000033.1[1174..16417]	Achromobacter arsenitoxydans SY8	477184	tripartite tricarboxylate transporter substrate binding protein_1	tripartite tricarboxylate transporter substrate binding protein	tripartite tricarboxylate transporter substrate binding protein	WP_008160555.1	52#WP_008160555.1#NZ_AGUF01000033.1[1174..16417]	NA	1	972	MNKLISAVVAAGAIVLGAPAAQAAGYPEKPVTMIVPFVPGGSSDITARSVTPGLSKILGQTFVVENKPGANSAIGAQALARSTPDGYTMMVGSIGTFAINEALYKNLAYNPSKDFAYLTQAVRNPNVLVAATSFPANNVAELVDYAKKNPGRVSYASSGTGSSDHLSAVLFRQRTQSTGVDVPYKGGGAAIADLIGGQVNVSFQNLGAVQNHIKAGKLKALAITGDARAPDLPDVPTLAEAGIKDMVVYSWQGFAVPKGTPPAVVEKLADALRTTLRDPQTQKTLQGLGFEVVANTPQQFAEFQQAEVKRWKDVIQKANIQLE	0	8120	9092	8	NA	NA	NA	no_plot	477184	Achromobacter arsenitoxydans SY8	TRUE	477184	Achromobacter arsenitoxydans SY8	1147684	Achromobacter arsenitoxydans	222	Achromobacter	506	Alcaligenaceae	80840	Burkholderiales	28216	Betaproteobacteria	1224	Proteobacteria	2	Bacteria	131567	cellular organisms
53	NZ_AGUF01000033.1[1174..16417]	Achromobacter arsenitoxydans SY8	477184	2-hydroxyacid dehydrogenase_1	2-hydroxyacid dehydrogenase	2-hydroxyacid dehydrogenase	WP_008160556.1	53#WP_008160556.1#NZ_AGUF01000033.1[1174..16417]	NA	1	957	MTTKQRIIQVGSLAGSPSANQRLADGYDVIELWKHPDRKAALAEHGKGVTAVVTSANFGANAELINALPDLKAICSWGVGYETIDVEAARKRGVLVSNTPDVLTDCVADLAWGLLIAGARRMGQGERFVRAGQWGQVHGSIPLGLRVSGKKLGIVGLGRIGEAIAKRGTGFDMDVRYHNRRKRDDVTYGYEASLTDLAKWADFLIVATVGGPSTRHLVNREVLEALGPKGIIVNIARGPVIDEAALVAALEAGKLGCAALDVFEHEPKVPEALIKSDKAVLLPHIGSATEETRLAMENMMLENLESFFATGRVITPVE	0	9181	10138	9	NA	NA	NA	no_plot	477184	Achromobacter arsenitoxydans SY8	TRUE	477184	Achromobacter arsenitoxydans SY8	1147684	Achromobacter arsenitoxydans	222	Achromobacter	506	Alcaligenaceae	80840	Burkholderiales	28216	Betaproteobacteria	1224	Proteobacteria	2	Bacteria	131567	cellular organisms
54	NZ_AGUF01000033.1[1174..16417]	Achromobacter arsenitoxydans SY8	477184	hypothetical protein_-1	hypothetical protein	hypothetical protein	WP_008160558.1	54#WP_008160558.1#NZ_AGUF01000033.1[1174..16417]	NA	-1	225	MTTHSRIAAFLSTSALCLGLAAAPAAFAAGAAKSGETKTQAQHKHHKSDKTSAKHAADKSGAKMDKSGATTPAK	0	10302	10527	10	NA	NA	NA	no_plot	477184	Achromobacter arsenitoxydans SY8	TRUE	477184	Achromobacter arsenitoxydans SY8	1147684	Achromobacter arsenitoxydans	222	Achromobacter	506	Alcaligenaceae	80840	Burkholderiales	28216	Betaproteobacteria	1224	Proteobacteria	2	Bacteria	131567	cellular organisms
55	NZ_AGUF01000033.1[1174..16417]	Achromobacter arsenitoxydans SY8	477184	sulfite exporter TauE/SafE family protein_-1	sulfite exporter TauE/SafE family protein	sulfite exporter TauE/SafE family protein	WP_008160561.1	55#WP_008160561.1#NZ_AGUF01000033.1[1174..16417]	NA	-1	780	MSLFVIAACLAAGGLIGFMGGVLGIGGGLIAIPALVLLMGMSQQLAQGTALIMVLPTIMMAVRKYNQQTRIDKRVALAGAAGAVVFTWVGAQMALGIDSSLLRRSFAVFLFFIALFYVWQTWRESRPAARRAQAPKREAPVFTPRRASVLGMLCGTLGGFFGVGGAVLAVPIITSVFRLPQTTAQALALSMVIPGSTIALITYTWAGQANWMVGAPLAIGSLVFVPIGVKLAYRLPERKLRACFAAMLFATVALLVFES	0	10740	11520	11	NA	NA	NA	no_plot	477184	Achromobacter arsenitoxydans SY8	TRUE	477184	Achromobacter arsenitoxydans SY8	1147684	Achromobacter arsenitoxydans	222	Achromobacter	506	Alcaligenaceae	80840	Burkholderiales	28216	Betaproteobacteria	1224	Proteobacteria	2	Bacteria	131567	cellular organisms
56	NZ_AGUF01000033.1[1174..16417]	Achromobacter arsenitoxydans SY8	477184	DNA repair protein RadA_-1	DNA repair protein RadA	DNA repair protein RadA	WP_008160564.1	56#WP_008160564.1#NZ_AGUF01000033.1[1174..16417]	NA	-1	1362	MAKSRTVYVCADCGGTTPKWQGKCPHCNAWNTLEETVESSAAAASNHRYAPLASSSPVRSLSEIEARETPRQPTGLEEFDRVLGGGLVAGAVVLIGGDPGIGKSTLLLQALASLSETTNVLYVTGEESAEQVALRARRLGLQTGNVNLLAEIRLEAIQAAVSEQKPTVAVIDSIQTLYSGELSAAPGSVSQVRECAAQLTRLAKQTGIAIVMIGHVTKDGALAGPRVLEHIVDTVLYFEGDTHSSFRLVRAFKNRFGAVNELGVFAMTDRGLRGVANPSALFLSQHEQQVAGSCVMATQEGTRPLLVEIQALVDSSHAPNPRRLTVGLEGNRLAMLLAVLHRHAGVSTFDQDVFVNAVGGVRITEPAADLPVLLAIMSSLRDRPLPRGLIAFGEVGLAG…	0	11661	13023	12	NA	NA	NA	no_plot	477184	Achromobacter arsenitoxydans SY8	TRUE	477184	Achromobacter arsenitoxydans SY8	1147684	Achromobacter arsenitoxydans	222	Achromobacter	506	Alcaligenaceae	80840	Burkholderiales	28216	Betaproteobacteria	1224	Proteobacteria	2	Bacteria	131567	cellular organisms
57	NZ_AGUF01000033.1[1174..16417]	Achromobacter arsenitoxydans SY8	477184	hypothetical protein_1	hypothetical protein	hypothetical protein	WP_008160566.1	57#WP_008160566.1#NZ_AGUF01000033.1[1174..16417]	NA	1	642	MSITYRPPFDEDDERDLRALYRKPGPGANPELDAAVRRRWHPGHSWHPGWGALACAVMVAGLFAWTDMREAADLPDLSAQLIPPPEVVPGADTPPAPQAVASDAQPVTLRRVVALQPEPAANQEPAVQASTEAAPEAATQEAAPESAQGEAAQAQTVVAFTEQDIEARVAQIRNLIVNDREEEAVQALRELQRGAPDLALPDDLQELSRQNPA	0	13439	14081	13	NA	NA	NA	no_plot	477184	Achromobacter arsenitoxydans SY8	TRUE	477184	Achromobacter arsenitoxydans SY8	1147684	Achromobacter arsenitoxydans	222	Achromobacter	506	Alcaligenaceae	80840	Burkholderiales	28216	Betaproteobacteria	1224	Proteobacteria	2	Bacteria	131567	cellular organisms
58	NZ_AGUF01000033.1[1174..16417]	Achromobacter arsenitoxydans SY8	477184	homoprotocatechuate degradation operon regulator HpaR_1	homoprotocatechuate degradation operon regulator HpaR	homoprotocatechuate degradation operon regulator HpaR	WP_008160568.1	58#WP_008160568.1#NZ_AGUF01000033.1[1174..16417]	NA	1	465	MSPSFHHRNLPHLLLYARETLMAHFRPILQAAGVTEQQWRVLRTLSDVGSMEPNQIARSCQILSPSLTRMLAGMEEQGLIKRTRSSADQRRQEISLTAKSNKLIDRMRPQVDAKYQEIEEKIGKDLLDRLYRDVDAMVDLIRRDTSEPRDSGKP	0	14179	14644	14	NA	NA	NA	no_plot	477184	Achromobacter arsenitoxydans SY8	TRUE	477184	Achromobacter arsenitoxydans SY8	1147684	Achromobacter arsenitoxydans	222	Achromobacter	506	Alcaligenaceae	80840	Burkholderiales	28216	Betaproteobacteria	1224	Proteobacteria	2	Bacteria	131567	cellular organisms
59	NZ_AGUF01000033.1[1174..16417]	Achromobacter arsenitoxydans SY8	477184	4-hydroxy-2-oxoheptanedioate aldolase_1	4-hydroxy-2-oxoheptanedioate aldolase	4-hydroxy-2-oxoheptanedioate aldolase	WP_008160570.1	59#WP_008160570.1#NZ_AGUF01000033.1[1174..16417]	NA	1	492	MDILTNTFKQALRDGKPQIGLWAGLASAYTSEILAGAGFDWLLIDGEHAPNTLDSTLAQLQSVAAYPVAPVVRPAWNDPVQIKQILDTGAQTLLVPMVQSAEEAAAAVAAVRYPPEGIRGVGSALARSSRWNRIPNYLERANGEMCVLVQIETPRGIQALDEILAVDGVDGAFIGPADLSASMGYLGQPEHPEVEKTIDDAITRIVRSGKAAGILHSGVTQAKHYLSLGATFVAVGVDAVLLARAAEALAGQFKELTTVAAGKGPY	1	14752	15244	15	NA	NA	NA	no_plot	477184	Achromobacter arsenitoxydans SY8	TRUE	477184	Achromobacter arsenitoxydans SY8	1147684	Achromobacter arsenitoxydans	222	Achromobacter	506	Alcaligenaceae	80840	Burkholderiales	28216	Betaproteobacteria	1224	Proteobacteria	2	Bacteria	131567	cellular organisms
60	NZ_BBYR01000104.1[11..10977]	Ideonella sakaiensis	1547922	helix-turn-helix domain-containing protein_-1	helix-turn-helix domain-containing protein	helix-turn-helix domain-containing protein	WP_054022744.1	60#WP_054022744.1#NZ_BBYR01000104.1[11..10977]	67	-1	762	MTDKNFVTSLDKGLQVLSCFGRQHARLTVSEAARLTGSTPASARRSLLTLQALGYLDSDGKRFWMLPKALLIAHAYLASRATPALAQPLLDALSERTGESASLGKLLDDDAIIIARSTARRSLSIGLGIGSRLPAYCSAIGRVLLASLPPGEAERRVRAMPRQPLTPRTVYEVRPVLELIARCREQGFAGSDGELELGVRSMAVPVHDRSGSLVGAMSIAVRAERMSFAEFREAFLAALRKAGTTLGERLYPE	0	529	1291	1	tph_r	1	5'H	plot	1547922	Ideonella sakaiensis	TRUE	NA	NA	1547922	Ideonella sakaiensis	36862	Ideonella	224471	Burkholderiales genera incertae sedis	80840	Burkholderiales	28216	Betaproteobacteria	1224	Proteobacteria	2	Bacteria	131567	cellular organisms
61	NZ_BBYR01000104.1[11..10977]	Ideonella sakaiensis	1547922	tannase/feruloyl esterase family alpha/beta hydrolase_-1	tannase/feruloyl esterase family alpha/beta hydrolase	tannase/feruloyl esterase family alpha/beta hydrolase	WP_054022745.1	61#WP_054022745.1#NZ_BBYR01000104.1[11..10977]	NA	-1	1812	MQTTVTTMLLASVALAACAGGGSTPLPLPQQQPPQQEPPPPPVPLASRAACEALKDGNGDMVWPNAATVVEVAAWRDAAPATASAAALPEHCEVSGAIAKRTGIDGYPYEIKFRLRMPAEWNGRFFMEGGSGTNGSLSAATGSIGGGQIASALSRNFATIATDGGHDNAVNDNPDALGTVAFGLDPQARLDMGYNSYDQVTQAGKAAVARFYGRAADKSYFIGCSEGGREGMMLSQRFPSHYDGIVAGAPGYQLPKAGISGAWTTQSLAPAAVGLDAQGVPLINKSFSDADLHLLSQAILGTCDALDGLADGIVDNYRACQAAFDPATAANPANGQALQCVGAKTADCLSPVQVTAIKRAMAGPVNSAGTPLYNRWAWDAGMSGLSGTTYNQGWRSWWL…	0	1393	3205	2	hydrolase	1	5'H	plot	1547922	Ideonella sakaiensis	TRUE	NA	NA	1547922	Ideonella sakaiensis	36862	Ideonella	224471	Burkholderiales genera incertae sedis	80840	Burkholderiales	28216	Betaproteobacteria	1224	Proteobacteria	2	Bacteria	131567	cellular organisms
62	NZ_BBYR01000104.1[11..10977]	Ideonella sakaiensis	1547922	helix-turn-helix domain-containing protein_-1	helix-turn-helix domain-containing protein	helix-turn-helix domain-containing protein	NA	62#NA#NZ_BBYR01000104.1[11..10977]	NA	-1	NA	NA	NA	3284	4163	3	pseudogene	1	5'H	plot	1547922	Ideonella sakaiensis	TRUE	NA	NA	1547922	Ideonella sakaiensis	36862	Ideonella	224471	Burkholderiales genera incertae sedis	80840	Burkholderiales	28216	Betaproteobacteria	1224	Proteobacteria	2	Bacteria	131567	cellular organisms
63	NZ_BBYR01000104.1[11..10977]	Ideonella sakaiensis	1547922	tripartite tricarboxylate transporter substrate binding protein_1	tripartite tricarboxylate transporter substrate binding protein	tripartite tricarboxylate transporter substrate binding protein	WP_054022746.1	63#WP_054022746.1#NZ_BBYR01000104.1[11..10977]	65	1	969	MTTALARRLGAACLTAACLLGSAAAQTPQALKIIVPYPAGGTADILPRVVAEKLRAQFPAGVLIDNRTGAGGNIGAEAVFRAEPDGNTLLASPPGPIAINHHLYRKMAFDPSKWEPVTVLATVPNVLVVNPRLPVKNVQEFIAYAKANPGKVTYGSQGNGTTSHLTASLFMQLTGTEMVHVPYKGTAPALVDLVGGQIDVFFDNISSSLPFHQAGKLRILGVADEQRSAALPEVPTFAEQGLPSMNAVTWFAVVAPPGTPAAKVAALQKSFAGALTQPEVQQKFAEQGAEPRGWDPARTGQFIRAESAKWDRVIRSANVRLD	0	4292	5261	4	tph_c	1	5'H	plot	1547922	Ideonella sakaiensis	TRUE	NA	NA	1547922	Ideonella sakaiensis	36862	Ideonella	224471	Burkholderiales genera incertae sedis	80840	Burkholderiales	28216	Betaproteobacteria	1224	Proteobacteria	2	Bacteria	131567	cellular organisms
64	NZ_BBYR01000104.1[11..10977]	Ideonella sakaiensis	1547922	Rieske 2Fe-2S domain-containing protein_1	Rieske 2Fe-2S domain-containing protein	Rieske 2Fe-2S domain-containing protein	WP_054022747.1	64#WP_054022747.1#NZ_BBYR01000104.1[11..10977]	78	1	1245	MQDTSTLQPVRWSGPGLTRIPYGVYRDAQLAAEEQARIFQGETWNYLCLEAELPEAGSYRTTFVGETPVVVVRDADGEVYAFENRCAHRGALIALEKSGRAENFQCVYHAWSYNRQGDLTGVAFEKGVKGRGGMPPGFCKEAHGPRKLRVANFCGLLFGSFGDEVPGIEEYLGEEICERIERVLHKPVEVIGRFTQALPNNWKLYVENVRDSYHASLLHLFFTTFELNRLSQKGGVIVDESGGNHVSYSMVDAQAEKDASYRDQGLRSDDANYRLKDPSLLAGFQEYGDGVTLQILSVFPGFVLQQIQNCLAVRQVLPRGVERTELNWTYLGYADDTPEQRQVRLKQSNLIGPAGFISMEDGAVGGFVQRGIAGAGALEAVVEMGGDGTASSEGRATEA…	0	5269	6514	5	tph_a2	1	5'H	plot	1547922	Ideonella sakaiensis	TRUE	NA	NA	1547922	Ideonella sakaiensis	36862	Ideonella	224471	Burkholderiales genera incertae sedis	80840	Burkholderiales	28216	Betaproteobacteria	1224	Proteobacteria	2	Bacteria	131567	cellular organisms
65	NZ_BBYR01000104.1[11..10977]	Ideonella sakaiensis	1547922	nuclear transport factor 2 family protein_1	nuclear transport factor 2 family protein	nuclear transport factor 2 family protein	WP_054022748.1	65#WP_054022748.1#NZ_BBYR01000104.1[11..10977]	67	1	465	MIDLLALCAFNAAYAETIDSDALERWPDFFTDDCHYRITHAENEREGLAAGIVYADSRAMLEDRIAALREANIYERQRYRHLLGIPLLGAQDDTGAEARTPFMVARIMATGQTELFASGIYRDRVVRQDGGLRLRSRVAVCDSTVTDTLLALPL	0	6554	7019	6	tph_a3	1	5'H	plot	1547922	Ideonella sakaiensis	TRUE	NA	NA	1547922	Ideonella sakaiensis	36862	Ideonella	224471	Burkholderiales genera incertae sedis	80840	Burkholderiales	28216	Betaproteobacteria	1224	Proteobacteria	2	Bacteria	131567	cellular organisms
66	NZ_BBYR01000104.1[11..10977]	Ideonella sakaiensis	1547922	4-hydroxythreonine-4-phosphate dehydrogenase PdxA_1	4-hydroxythreonine-4-phosphate dehydrogenase PdxA	4-hydroxythreonine-4-phosphate dehydrogenase PdxA	WP_082368716.1	66#WP_082368716.1#NZ_BBYR01000104.1[11..10977]	65	1	939	MAVGDPNGIGPEIALKALAALPAAARGRITLYGPAAVLERTASQLGQEALLREQPVVDAGALPAQAARPGRIDPAAGASAVASASAAIEACRRGEADAVVACPHHETAIHQAGIAFSGYPSLVARVCGQPEDSVFLMLVGGGLRIVHATLHESVAHALGRLQPALIAAAARAGARACARLGVADPRIGVFGINPHASEGGLFGPEDAQHVEPAVQALRAEGLRVDGPLGADLLLAQRRHDLYVAMLHDQGHIPVKLLAPNAASALSIGAQVLLSSVGHGSAMDIAGRGIADPGAVLRTIALLSGAGVEEGTA	0	7057	7996	7	tph_b	1	5'H	plot	1547922	Ideonella sakaiensis	TRUE	NA	NA	1547922	Ideonella sakaiensis	36862	Ideonella	224471	Burkholderiales genera incertae sedis	80840	Burkholderiales	28216	Betaproteobacteria	1224	Proteobacteria	2	Bacteria	131567	cellular organisms
67	NZ_BBYR01000104.1[11..10977]	Ideonella sakaiensis	1547922	2Fe-2S iron-sulfur cluster binding domain-containing protein_1	2Fe-2S iron-sulfur cluster binding domain-containing protein	2Fe-2S iron-sulfur cluster binding domain-containing protein	WP_054022750.1	67#WP_054022750.1#NZ_BBYR01000104.1[11..10977]	59	1	1017	MNHRITIEGSDAAFDCGPAQSVLDAALRAGIELPYSCRKGVCGNCAGAVAEGEVAGLGGPIRNESCAPDQVLFCMCAPRGDLRIRPAAWHRVDPSARKRFTAKVFRNQLAAPDVSVLQLRLPAGQRARFQAGQYLQLALPDGSTRCYSMANPPHENDTLTLHVRHVPGGAFSARVPGLAPGDAIEVELPFGAVTLEADARRPIVFVVGGTGFAPARSILDDMARWRVERPITLIWGARRAEGIYLRPAIAKWQRQWPQGFRFVEALSGEAREGAFAGRVDAALRAHCPDLSGHELYCCGSPGMVQSVREAAVQALGLPAARFHADVFVNGPAAGAVPA	0	7992	9009	8	tph_a1	1	5'H	plot	1547922	Ideonella sakaiensis	TRUE	NA	NA	1547922	Ideonella sakaiensis	36862	Ideonella	224471	Burkholderiales genera incertae sedis	80840	Burkholderiales	28216	Betaproteobacteria	1224	Proteobacteria	2	Bacteria	131567	cellular organisms
68	NZ_BBYR01000104.1[11..10977]	Ideonella sakaiensis	1547922	LysR family transcriptional regulator_1	LysR family transcriptional regulator	LysR family transcriptional regulator	WP_054022751.1	68#WP_054022751.1#NZ_BBYR01000104.1[11..10977]	NA	1	894	MIELRHLRYFIAVAEELNFRRAAERVHVDQTPLSRTVRDLEEQLGVTLLVRAPRRLKLTPAGSKLLEHARMLFTRLERIKRVVRETDARYRAPLRVGVADGMAQLRLSECFAGWRALAPDIPLEIAEMPAAELSGALRREEVDIGFSFGLPDDDAIAQEMAWDYPLVALLPPDHELATREVVQTSELLSFPMIACRLDRLPGLRRQMDAVRQNYAARPVIAAEARTLVGYVIRVAAGLGVGVADAGHMATLRRTDVVVVPLAEDIRIKTYVLHKHRRDGLPQMLQRFLAYARTLHQP	0	9179	10073	9	NA	1	5'H	no_plot	1547922	Ideonella sakaiensis	TRUE	NA	NA	1547922	Ideonella sakaiensis	36862	Ideonella	224471	Burkholderiales genera incertae sedis	80840	Burkholderiales	28216	Betaproteobacteria	1224	Proteobacteria	2	Bacteria	131567	cellular organisms
69	NZ_BBYR01000104.1[11..10977]	Ideonella sakaiensis	1547922	conjugal transfer protein TraG_1	conjugal transfer protein TraG	conjugal transfer protein TraG	NA	69#NA#NZ_BBYR01000104.1[11..10977]	NA	1	NA	NA	NA	10334	10967	10	pseudogene	1	5'H	no_plot	1547922	Ideonella sakaiensis	TRUE	NA	NA	1547922	Ideonella sakaiensis	36862	Ideonella	224471	Burkholderiales genera incertae sedis	80840	Burkholderiales	28216	Betaproteobacteria	1224	Proteobacteria	2	Bacteria	131567	cellular organisms
70	NZ_BCWP01000013.1[69652..84845]	Curvibacter delicatus NBRC 14919	1349763	ABC transporter ATP-binding protein_1	ABC transporter ATP-binding protein	ABC transporter ATP-binding protein	WP_066705783.1	70#WP_066705783.1#NZ_BCWP01000013.1[69652..84845]	NA	1	60	MKQRPMGDVILDVQNISLSFGGVKALTDISFNVREHEIRAIIGPNGAGKSSMLNCINGVYQPQQGSITFRGQTFHHMNSRQVAEMGVARTFQNLALFKGMSVLDNIMSGRNLKIKSNLLLQALRIGPAEREEIRHREQVERIIDFLEIQAHRKTPVGQLPYGLQKRVDLGRALAMEPQVLLLDEPMAGMNVEEKQDMCRFILDVNDEFGTTVVLIEHDMGVVMDISDRVVVLDYGKKIGDGVPDEVRNNEDVIRAYLGTSH	1	0	60	1	NA	NA	NA	no_plot	1349763	Curvibacter delicatus NBRC 14919	TRUE	1349763	Curvibacter delicatus NBRC 14919	80879	Curvibacter delicatus	281915	Curvibacter	80864	Comamonadaceae	80840	Burkholderiales	28216	Betaproteobacteria	1224	Proteobacteria	2	Bacteria	131567	cellular organisms
71	NZ_BCWP01000013.1[69652..84845]	Curvibacter delicatus NBRC 14919	1349763	branched-chain amino acid ABC transporter permease_1	branched-chain amino acid ABC transporter permease	branched-chain amino acid ABC transporter permease	WP_066705785.1	71#WP_066705785.1#NZ_BCWP01000013.1[69652..84845]	NA	1	930	MAFFSETLLGGLMAGMLYSLVALGFVLIFKASGVFNFAQGAMVLFAALAMARFAEWIPGWTGIDNPIVANIAAFVLAGVVMFVVAWLIERLVLRHLVNQEAATLLMATLGITYFMEGLGQTLFGSDIYKIDVGMPKDPIFVLESMFEGGILVNKEDVIAAAIAAALVAALSLFFQKTSTGRALRAVADDHQAAQSIGIPLNRIWVIVWCVAGVVALVSGMIWGSKLGVQFSLTTVALRALPVVILGGLTSVPGAIIGGLIIGVGEKLSEVFLGPYVGGGIEIWFAYVLALLFLLVRPQGLFGEKIIDRV	0	78	1008	2	NA	NA	NA	no_plot	1349763	Curvibacter delicatus NBRC 14919	TRUE	1349763	Curvibacter delicatus NBRC 14919	80879	Curvibacter delicatus	281915	Curvibacter	80864	Comamonadaceae	80840	Burkholderiales	28216	Betaproteobacteria	1224	Proteobacteria	2	Bacteria	131567	cellular organisms
72	NZ_BCWP01000013.1[69652..84845]	Curvibacter delicatus NBRC 14919	1349763	branched-chain amino acid ABC transporter permease_1	branched-chain amino acid ABC transporter permease	branched-chain amino acid ABC transporter permease	WP_066705786.1	72#WP_066705786.1#NZ_BCWP01000013.1[69652..84845]	NA	1	1065	MFYRENGQFKTSYVADQQIFPIAQDRLVILLLLAVAFVAVPLLASDYTFRAILIMSLAALGVNVLVGYCGQISLGSGAFMAVGAYGAYNFFVRVPDMPLIPALILGGLCATFFGILFGLPSLRVKGLYLAVATLAAQFFSDWMFLRIKWLTNDSSSGSVSVSSLQVFGLPIDSAQSKYWFCLAILVVMALLAKNLVRGAIGREWMAIRDMDVAAAVIGIRPMYAKLSAFAVSSFIIGVAGALWAFVYLGAWEPAAFSVDVSFRLLFMVIIGGLGSIMGAFFGAAFIVVLPILLNQFLPALFGLFGVEISTADVSHAELMIFGGLIVWFLIVEPHGLAKLWSTAKQKLRVWPFPY	0	1019	2084	3	NA	NA	NA	no_plot	1349763	Curvibacter delicatus NBRC 14919	TRUE	1349763	Curvibacter delicatus NBRC 14919	80879	Curvibacter delicatus	281915	Curvibacter	80864	Comamonadaceae	80840	Burkholderiales	28216	Betaproteobacteria	1224	Proteobacteria	2	Bacteria	131567	cellular organisms
73	NZ_BCWP01000013.1[69652..84845]	Curvibacter delicatus NBRC 14919	1349763	ABC transporter substrate-binding protein_1	ABC transporter substrate-binding protein	ABC transporter substrate-binding protein	WP_066705787.1	73#WP_066705787.1#NZ_BCWP01000013.1[69652..84845]	NA	1	1329	MKLSKLVIAAAVVAAGTTSLATGAFAQAKEQFFPLLSYRTGPYAPNGTPWANGKQDYLKMINARDGGINGVKLTFEECETGYATDRGVECYERLKSRPGVTLFDPQSTGITFALTEKAPADKMPLMTLGYGLSVSQDGMAFKWNFPMMGSYWTGADILIQHIGKSLGGVDKLKGKKVALVYHDSPFGKEPIPLLQERAKMHGFDLQLLPVTAPGVEQKATWLQVRQSRPDYVLLWGWGVMNSTALKEAQATGYPRDKMYGVWWAGAEPDAKDVGEGAKGYHALALNTSGQEPKVIQDILKHVHAKGHGTGPKDEVGSVLYTRGVIIQMLGVEAVRRAQERFGKGKVMTSEQVRWGLENLALDQKRLDALGFAGVMRPLSTSCADHMGSTWARVHTWDGK…	0	2141	3470	4	NA	NA	NA	no_plot	1349763	Curvibacter delicatus NBRC 14919	TRUE	1349763	Curvibacter delicatus NBRC 14919	80879	Curvibacter delicatus	281915	Curvibacter	80864	Comamonadaceae	80840	Burkholderiales	28216	Betaproteobacteria	1224	Proteobacteria	2	Bacteria	131567	cellular organisms
74	NZ_BCWP01000013.1[69652..84845]	Curvibacter delicatus NBRC 14919	1349763	ABC transporter ATP-binding protein_1	ABC transporter ATP-binding protein	ABC transporter ATP-binding protein	WP_066705788.1	74#WP_066705788.1#NZ_BCWP01000013.1[69652..84845]	NA	1	810	MDSRNILLNVNGIEVIYNHVILVLKGVSLQVPEGGIVALLGGNGAGKTTTLRAVSNLLQGERGEVTKGSIELRGERIENLSPADLVQRGVVQVMEGRHCFAHLTIEENLLTGAYTRKSKAEIAANLEKVYNYFPRLKTRRASQAAYTSGGEQQMCAIGRALMANPSMVLLDEPSMGLAPQIVEEVFEIVKDLNQKEKVTFLLAEQNTNMALKYADYGYIMESGRVVMDGIANELANNEDVKEFYLGVGGGERKSFRDVKSYKRRKRWLA	0	3641	4451	5	NA	NA	NA	no_plot	1349763	Curvibacter delicatus NBRC 14919	TRUE	1349763	Curvibacter delicatus NBRC 14919	80879	Curvibacter delicatus	281915	Curvibacter	80864	Comamonadaceae	80840	Burkholderiales	28216	Betaproteobacteria	1224	Proteobacteria	2	Bacteria	131567	cellular organisms
75	NZ_BCWP01000013.1[69652..84845]	Curvibacter delicatus NBRC 14919	1349763	AMP-binding protein_1	AMP-binding protein	AMP-binding protein	WP_066705789.1	75#WP_066705789.1#NZ_BCWP01000013.1[69652..84845]	NA	1	1275	MSKHYDALETRDPAQREAALMAALPGHVARAQQAAPALAEILRGVDAAGVNSRAALARLPVTRKHELLERQQAARAQVPGRDPFGGFAAVGWHGLLRNSGARRVYQSPGPIYEPEGHAADYWRSARAFAAAGFEAGDLVHNCFSYHLTPGAWIMEAGAQALGCTVFPGGVGNTEQQLAAMADLQPVAYAGTPSFLKILVEKAQESGVRLSFTKAMVSGEAFPPSLRDWFAERGITGYQCYATADVGLIAYETSAREGLVLDEGVILEIVRPGTGDPVAEGEVGEVVVTVLNPDYPLIRFGTGDLSATLPGACPTGRTNTRIRGWMGRADQTTKVRGMFVHPGQVAEIVKRFPEVGRARLVVTGEMANDAMTLKVETRGDAPDGLVARIGQVIRDVTKLR…	0	4587	5862	6	NA	NA	NA	no_plot	1349763	Curvibacter delicatus NBRC 14919	TRUE	1349763	Curvibacter delicatus NBRC 14919	80879	Curvibacter delicatus	281915	Curvibacter	80864	Comamonadaceae	80840	Burkholderiales	28216	Betaproteobacteria	1224	Proteobacteria	2	Bacteria	131567	cellular organisms
76	NZ_BCWP01000013.1[69652..84845]	Curvibacter delicatus NBRC 14919	1349763	hypothetical protein_1	hypothetical protein	hypothetical protein	WP_066705790.1	76#WP_066705790.1#NZ_BCWP01000013.1[69652..84845]	NA	1	978	MKRLLILAAAVTAFAVHAQTAFPGAKPITIVVPFSAGGPTDRVARDLAEAMRKPLGGASILVDNAAGAGGTIGANKVAKAAPDGHTLFLHHIGMATSPALYRKLPYSVENDFEFLGMVNEVPMTLIGRPSLPANNYKELSVWINANKGKINLGNAGLGAASHLCGLMFQNALGIDMTTVPYKGTAPAITDLIGGQIDLLCDQTTNTTSQIEGKKVKAFAVTTAKRLTTPALKDLPTLQESGLKGFDVSIWHGLYAPKGTPADVLAKINTALKAALKDPEFIKKQEGLGAVVVTDKRVEPAEHKKFVLAEIAKWGPVIKAAGVYAD	0	5940	6918	7	NA	NA	NA	no_plot	1349763	Curvibacter delicatus NBRC 14919	TRUE	1349763	Curvibacter delicatus NBRC 14919	80879	Curvibacter delicatus	281915	Curvibacter	80864	Comamonadaceae	80840	Burkholderiales	28216	Betaproteobacteria	1224	Proteobacteria	2	Bacteria	131567	cellular organisms
77	NZ_BCWP01000013.1[69652..84845]	Curvibacter delicatus NBRC 14919	1349763	tripartite tricarboxylate transporter substrate binding protein_1	tripartite tricarboxylate transporter substrate binding protein	tripartite tricarboxylate transporter substrate binding protein	WP_066705791.1	77#WP_066705791.1#NZ_BCWP01000013.1[69652..84845]	NA	1	1017	MPAFDSFKKNRRLSLALIAGAAHFLIAGSSLAQSGWPNKPVRIVVPFAPGGTTDILARAVAPELSKAFGQQFVVDNRAGAGGNVGADIVAKSPGDGYTLLMGTVGTHGINKALYAKLPYDPQKDFVPITLVAAVPNVMEMNADKAKALGINTVADFIKYAKANPGKLNMASSGNGTSIHLAGELFKSMTGIFMTHIPYRGSGPALLDMVAGNMDVMFDNLPSSMAQIKAGKLKALAVTSSQRSAALPDVPTVEEAGHLKGFEASSWFGLLAPAGTPQDIVNRIQQEVAKSLNTPAIKEKLLAQGAIPSGNTPTEFAKLIDAEHKKWAKVVKDSGAKVD	0	7048	8065	8	tph_c	NA	NA	no_plot	1349763	Curvibacter delicatus NBRC 14919	TRUE	1349763	Curvibacter delicatus NBRC 14919	80879	Curvibacter delicatus	281915	Curvibacter	80864	Comamonadaceae	80840	Burkholderiales	28216	Betaproteobacteria	1224	Proteobacteria	2	Bacteria	131567	cellular organisms
78	NZ_BCWP01000013.1[69652..84845]	Curvibacter delicatus NBRC 14919	1349763	DUF1840 domain-containing protein_-1	DUF1840 domain-containing protein	DUF1840 domain-containing protein	WP_066705793.1	78#WP_066705793.1#NZ_BCWP01000013.1[69652..84845]	NA	-1	327	MLYKFKSPAAADLIMLEPHGRRVLQIIGKPVDVKQGILQPVDMPVAAAALEAAIVHEEAQRKAAEAEAAARGEELPPQESISLRQRAAPFIEMLRRCEKADKAIVWGV	0	8203	8530	9	NA	NA	NA	no_plot	1349763	Curvibacter delicatus NBRC 14919	TRUE	1349763	Curvibacter delicatus NBRC 14919	80879	Curvibacter delicatus	281915	Curvibacter	80864	Comamonadaceae	80840	Burkholderiales	28216	Betaproteobacteria	1224	Proteobacteria	2	Bacteria	131567	cellular organisms
79	NZ_BCWP01000013.1[69652..84845]	Curvibacter delicatus NBRC 14919	1349763	acyl-CoA-binding protein_-1	acyl-CoA-binding protein	acyl-CoA-binding protein	WP_066705795.1	79#WP_066705795.1#NZ_BCWP01000013.1[69652..84845]	NA	-1	255	MSDLQTRFEAAVANSKNLSERPDNPTLLKIYALYKQATTGDVEGDRPGFSDFVGRAKWDAWNGLKGKTAEEAMQLYIDLIESLS	0	8540	8795	10	NA	NA	NA	no_plot	1349763	Curvibacter delicatus NBRC 14919	TRUE	1349763	Curvibacter delicatus NBRC 14919	80879	Curvibacter delicatus	281915	Curvibacter	80864	Comamonadaceae	80840	Burkholderiales	28216	Betaproteobacteria	1224	Proteobacteria	2	Bacteria	131567	cellular organisms
80	NZ_BCWP01000013.1[69652..84845]	Curvibacter delicatus NBRC 14919	1349763	TetR/AcrR family transcriptional regulator_-1	TetR/AcrR family transcriptional regulator	TetR/AcrR family transcriptional regulator	WP_066705800.1	80#WP_066705800.1#NZ_BCWP01000013.1[69652..84845]	NA	-1	687	MAKKAPRRTAQRIQEAALTLFNRFGEPHVSTALIASEVGISPGNLHYHYPAKDKLVGALFAQYEQALAELLPAGGGVQDVEDTWFFMHSLFELVWQYRFLYRDLNDLLSRNRLLETSIQVCMTTQVDAMRAMLESLRAAHVLNIDERELPVTANCLMVILTYWLSFEYVRDPRHALEPENGQVALLRGAQHALGLLAPFLAPSQRAHLLQLRDAYTTTSLQPFLPSAS	0	8791	9478	11	NA	NA	NA	no_plot	1349763	Curvibacter delicatus NBRC 14919	TRUE	1349763	Curvibacter delicatus NBRC 14919	80879	Curvibacter delicatus	281915	Curvibacter	80864	Comamonadaceae	80840	Burkholderiales	28216	Betaproteobacteria	1224	Proteobacteria	2	Bacteria	131567	cellular organisms
81	NZ_BCWP01000013.1[69652..84845]	Curvibacter delicatus NBRC 14919	1349763	phasin family protein_-1	phasin family protein	phasin family protein	WP_066705802.1	81#WP_066705802.1#NZ_BCWP01000013.1[69652..84845]	NA	-1	474	MAKKPTQAAQSARTAPLLPDAIKDSAHEIWLAGLAAFSKAQQEGSKMFDALVQEGLTIQRKTQSAAEEKISAATQKMNRMADEIGTRATGQWDKLESIFEDRVARALKSLGVPTAGEVDALAARLAALEKAAQPRPARTASVKKAPARKRPAARKTS	0	9479	9953	12	NA	NA	NA	no_plot	1349763	Curvibacter delicatus NBRC 14919	TRUE	1349763	Curvibacter delicatus NBRC 14919	80879	Curvibacter delicatus	281915	Curvibacter	80864	Comamonadaceae	80840	Burkholderiales	28216	Betaproteobacteria	1224	Proteobacteria	2	Bacteria	131567	cellular organisms
82	NZ_BCWP01000013.1[69652..84845]	Curvibacter delicatus NBRC 14919	1349763	dTDP-glucose 4,6-dehydratase_1	dTDP-glucose 4,6-dehydratase	dTDP-glucose 4,6-dehydratase	WP_066705804.1	82#WP_066705804.1#NZ_BCWP01000013.1[69652..84845]	NA	1	1056	MILVTGGAGFIGANFLLDWLKQSDEPVVNLDKLTYAGNLENLTSLQGDARHVFVRGDIGDTALVERLLSEHRPRAVLNFAAESHVDRSIQEAEDFIQTNIVGTFRLLEAVRPYWTGLAAEDKSSFRFLHVSTDEVYGSLGKGEPAFTEEHRYAPNSPYSASKASSDHLVRAYHHTYGLPVLTTNCSNNYGPFHFPEKLIPLMIVNALAGKSLPVYGDGQQIRDWLYVKDHCSAIRRVLEAGRLGEVYNVGGWNEKPNIEIVNTVCALLDELRPRMDKKSYREQITYVKDRPGHDRRYAIDARKLEHELGWKPAETFETGIRKTVQWYLDNQGWVSSVTSGSCRQWMDWQDV	0	10083	11139	13	NA	NA	NA	no_plot	1349763	Curvibacter delicatus NBRC 14919	TRUE	1349763	Curvibacter delicatus NBRC 14919	80879	Curvibacter delicatus	281915	Curvibacter	80864	Comamonadaceae	80840	Burkholderiales	28216	Betaproteobacteria	1224	Proteobacteria	2	Bacteria	131567	cellular organisms
83	NZ_BCWP01000013.1[69652..84845]	Curvibacter delicatus NBRC 14919	1349763	dTDP-4-dehydrorhamnose reductase_1	dTDP-4-dehydrorhamnose reductase	dTDP-4-dehydrorhamnose reductase	WP_066705806.1	83#WP_066705806.1#NZ_BCWP01000013.1[69652..84845]	NA	1	924	MKILLLGKSGQVGWELQRALSVLGEVVALDRHGAEGLCGDLSDLQGLAKTVRRVQPQVIANAAAYTAVDKAEGEPELARTLNAQAPDVLAREAQQLGAWLVHYSTDYVFDGSGDRPWRETDAPAPLSVYGQTKLEGERQIVSSGCRHLIFRTSWVYAVRGNNFAKTILRLACEREQLSVVNDQIGAPTGADLLADVTAHALRHVLPPVGHNNLAQSGIYHLTASGEASWYDYARFVLENAIRAEGVFKLRPDNMVSVPSSTYSMPARRPHNSRLDTAKLRATFGLSLPDWRLGVSRMLAELFEGPKS	0	11146	12070	14	NA	NA	NA	no_plot	1349763	Curvibacter delicatus NBRC 14919	TRUE	1349763	Curvibacter delicatus NBRC 14919	80879	Curvibacter delicatus	281915	Curvibacter	80864	Comamonadaceae	80840	Burkholderiales	28216	Betaproteobacteria	1224	Proteobacteria	2	Bacteria	131567	cellular organisms
84	NZ_BCWP01000013.1[69652..84845]	Curvibacter delicatus NBRC 14919	1349763	glucose-1-phosphate thymidylyltransferase RfbA_1	glucose-1-phosphate thymidylyltransferase RfbA	glucose-1-phosphate thymidylyltransferase RfbA	WP_066705808.1	84#WP_066705808.1#NZ_BCWP01000013.1[69652..84845]	NA	1	885	MTQRKGLILAGGLGTHLYPATLAISKQLLPVYDKPMIYYPLSTLMLAGIRDILLISTPQDTPRFQQLLGDGSQWGIYLQYAVQPSPDGLAQAFIIGERFIENHPCALVLGDNIFYGHDLQSLLRDAGAQVDGATVFAYHVRDPRRYGVVTFDAQGQAHSIEEKPQQPRSNYAVTGLYFYDNQVVDVAKAVQPSARGELEITAVNQHYLEHGRLHVQIMKRGYAWLDTGAHESLMEAGQFIATLEHRQGLKIACPEEVAWRNEWITDEQLQRLAQPLAKSGYGQYLLQLLADHVR	0	12066	12951	15	NA	NA	NA	no_plot	1349763	Curvibacter delicatus NBRC 14919	TRUE	1349763	Curvibacter delicatus NBRC 14919	80879	Curvibacter delicatus	281915	Curvibacter	80864	Comamonadaceae	80840	Burkholderiales	28216	Betaproteobacteria	1224	Proteobacteria	2	Bacteria	131567	cellular organisms
85	NZ_BCWP01000013.1[69652..84845]	Curvibacter delicatus NBRC 14919	1349763	dTDP-4-dehydrorhamnose 3,5-epimerase_1	dTDP-4-dehydrorhamnose 3,5-epimerase	dTDP-4-dehydrorhamnose 3,5-epimerase	WP_066705810.1	85#WP_066705810.1#NZ_BCWP01000013.1[69652..84845]	NA	1	546	MKVVPTAIPEVLIIEPLVFGDSRGFFFESFNQRAFSQAVGQDVQFLQDNHSRSAHGVLRGLHYQLLRPQGKLVRVVRGAVFDVAVDIRRSSPTFGRWTGAMLTEDNCRQMWIPPGFAHGFLVTSESADFLYKTTDYYAPEHERCIIWNDAELAIEWPVPMGLQLSEKDAMGCSFAAAEKYV	0	12962	13508	16	NA	NA	NA	no_plot	1349763	Curvibacter delicatus NBRC 14919	TRUE	1349763	Curvibacter delicatus NBRC 14919	80879	Curvibacter delicatus	281915	Curvibacter	80864	Comamonadaceae	80840	Burkholderiales	28216	Betaproteobacteria	1224	Proteobacteria	2	Bacteria	131567	cellular organisms
86	NZ_BCWP01000013.1[69652..84845]	Curvibacter delicatus NBRC 14919	1349763	mannose-1-phosphate guanylyltransferase/mannose-6-phosphate isomerase_1	mannose-1-phosphate guanylyltransferase/mannose-6-phosphate isomerase	mannose-1-phosphate guanylyltransferase/mannose-6-phosphate isomerase	WP_066705812.1	86#WP_066705812.1#NZ_BCWP01000013.1[69652..84845]	NA	1	1425	MIHPVILCGGSGTRLWPLSRKAFPKQFIPLLGDKSLLQLTMERVAPLAKGKPESITCVAAEEHRFLVADVATQVGLSVRQILEPQAKNTAAAMALAALAVPGDTLLLFCPADHHIPDDQAFCAMVQGAVLAAQAGQLVIFGVQPSFPSTAYGYIQKGSAVGDGFVVARFVEKPSHDKALEFLASGQYLWNAGVFLMRAQDLLAALQAHAPDILDVCRQAMRLPQRDGLFLRPDAQIFATCRGQSIDYAVMEKARNVSVFSFAGVWSDVGSWTAVAQLAAPDAQGNRAGGDVQLAHHLHARDTYIHAGGQRPVVTLGTKNLLVIDTSDALLVADAAHAEAVKEVVVKLEELDASQAVQHRRVARPWGWYDSVDFGARHQVKRITVKPGAALSLQMHRHRA…	0	13529	14954	17	NA	NA	NA	no_plot	1349763	Curvibacter delicatus NBRC 14919	TRUE	1349763	Curvibacter delicatus NBRC 14919	80879	Curvibacter delicatus	281915	Curvibacter	80864	Comamonadaceae	80840	Burkholderiales	28216	Betaproteobacteria	1224	Proteobacteria	2	Bacteria	131567	cellular organisms
87	NZ_BJYU01000019.1[80715..95984]	Microvirga aerophila	670291	thioredoxin domain-containing protein_-1	thioredoxin domain-containing protein	thioredoxin domain-containing protein	WP_114186747.1	87#WP_114186747.1#NZ_BJYU01000019.1[80715..95984]	NA	-1	1055	MNRLMDASSPYLLQHRDNPVHWWEWGPEAFAEARRENKPVLISIGYAACHWCHVMAHESFEDAGVAQVMNELFVNIKVDREERPDVDHVYMSALHALGEQGGWPLTMFLTPDGEPFWGGTYFPKEPRFGRPGFKQVLHEISRIYHAEPDRVRQNAGALKNHLAQTATGDGGTLGLADLDQFGTRLVGVFDEENGGIQGAPKFPNPPILEFLLRYARRARDGAARNRFLHTLERMAFGGIYDHLGGGFARYSVDAQWLVPHFEKMLYDNAQLLELYAVGFAETGRPLFRTAAEGIVAWLEREMTTPEGGFASSLDADSEGEEGRFYVWSLAEIHQVLGREDGDFFAKVYDITEHGNWEETNIPNRLISGEAPAAVEERLAPMRTRLLDHRAGRVRPGLDD…	1	0	1055	1	NA	NA	NA	no_plot	670291	Microvirga aerophila	TRUE	NA	NA	670291	Microvirga aerophila	186650	Microvirga	119045	Methylobacteriaceae	356	Rhizobiales	28211	Alphaproteobacteria	1224	Proteobacteria	2	Bacteria	131567	cellular organisms
88	NZ_BJYU01000019.1[80715..95984]	Microvirga aerophila	670291	tRNA uridine-5-carboxymethylaminomethyl(34) synthesis GTPase MnmE_1	tRNA uridine-5-carboxymethylaminomethyl(34) synthesis GTPase MnmE	tRNA uridine-5-carboxymethylaminomethyl(34) synthesis GTPase MnmE	WP_114186746.1	88#WP_114186746.1#NZ_BJYU01000019.1[80715..95984]	NA	1	1311	MRSDDTIFATASGYGRSAVCLIRISGGASRTVVETLAGSVPEPRRAAVRILRDPQNGEPLDQALVLWMPGPSSFTGEDQAELHIHGGLATRAAVLRVLATLEGCRPAEAGEFTRRAFLNGRMDLSRVEGLADLIDAETEAQRRQALRQLEGRLGNAAEGWREDILQALALLEASLDFSDEGDVPEDLEAEILRKLTLLAEDIRRVLANRSGERLREGLTVVLAGPPNAGKSTLLNALAQRDVAIVSPIAGTTRDTIEVHCDLSGFPVVITDTAGLRDTHDLIEQEGVSRARAKAQDADVVLWLVPPEGAGTEPPQARRLLSVATKVDLSHVRHNCDVAVSAATGEGISDLIRRLQTEAEAALGQGDAILTRQRHRSALERAQASILRAIDMMKAHGPLE…	0	1170	2481	2	NA	NA	NA	no_plot	670291	Microvirga aerophila	TRUE	NA	NA	670291	Microvirga aerophila	186650	Microvirga	119045	Methylobacteriaceae	356	Rhizobiales	28211	Alphaproteobacteria	1224	Proteobacteria	2	Bacteria	131567	cellular organisms
89	NZ_BJYU01000019.1[80715..95984]	Microvirga aerophila	670291	tRNA uridine-5-carboxymethylaminomethyl(34) synthesis enzyme MnmG_1	tRNA uridine-5-carboxymethylaminomethyl(34) synthesis enzyme MnmG	tRNA uridine-5-carboxymethylaminomethyl(34) synthesis enzyme MnmG	WP_114186745.1	89#WP_114186745.1#NZ_BJYU01000019.1[80715..95984]	NA	1	1884	MIQQFDVIVVGGGHAGSEAAAAAARTGARTALITHKAATIGVMSCNPAIGGLGKGHLVREIDALDGVMGRIADKAGIQFRLLNRRKGPAVRGPRTQADRKLYARAMQAELALTPNLTIVEGEADDLVVKDSHVTGLLVADGRILATGAVVLTTGTFLSGLIHIGEHKIPAGRMGERPSLGLPKTLQRLGFTLGRLKTGTPPRLDGRTIDWASVEKQAADEDPVPFSMLTQRITTPQIECGITRTTPAIHELIRGNLHRAPMYSGDIQGRGPRYCPSIEDKVVRFADRESHQIFLEPEGLDDYTVYPNGISTSLPEDVQRELLPHIPGLERVRMLQPGYAIEYDYVDPRNLTTSLETKAVQGLFLAGQINGTTGYEEAAAQGLVAGLNAARRSASQDGAV…	0	2683	4567	3	NA	NA	NA	no_plot	670291	Microvirga aerophila	TRUE	NA	NA	670291	Microvirga aerophila	186650	Microvirga	119045	Methylobacteriaceae	356	Rhizobiales	28211	Alphaproteobacteria	1224	Proteobacteria	2	Bacteria	131567	cellular organisms
90	NZ_BJYU01000019.1[80715..95984]	Microvirga aerophila	670291	16S rRNA (guanine(527)-N(7))-methyltransferase RsmG_1	16S rRNA (guanine(527)-N(7))-methyltransferase RsmG	16S rRNA (guanine(527)-N(7))-methyltransferase RsmG	WP_114186822.1	90#WP_114186822.1#NZ_BJYU01000019.1[80715..95984]	NA	1	627	MSAPDRHLDGFDVSRETEEKLSLLESELRRWQAIKNLVGPGTLDHVWDRHIVDSLQLLELTPTAKTWLDLGSGAGFPGLVLAIAGYERGLQVDLVESNSRKCAFLRHIARLTGARAKVHEARLETVIPGFVGKADIVSARALASLAKLLEWTEPLLKTGTTGLFPKGRDAESELTEARESWTFDLEILPSRTDADARILRITSIESLS	0	4575	5202	4	NA	NA	NA	no_plot	670291	Microvirga aerophila	TRUE	NA	NA	670291	Microvirga aerophila	186650	Microvirga	119045	Methylobacteriaceae	356	Rhizobiales	28211	Alphaproteobacteria	1224	Proteobacteria	2	Bacteria	131567	cellular organisms
91	NZ_BJYU01000019.1[80715..95984]	Microvirga aerophila	670291	ParA family protein_1	ParA family protein	ParA family protein	WP_114186744.1	91#WP_114186744.1#NZ_BJYU01000019.1[80715..95984]	NA	1	837	MTTDRSGSDQGTPAKPRVLVLANQKGGVGKTTTAINLGTALAAIGEKVLILDLDPQGNASTGLGIDRKSRRVSTYHVLAGESSLENAITETVVPGLFVAPSTLDLLGIELEIAHERDRTHRLRNAIKALMASEVTKPFTYILIDCPPSLNLLTINALTAADAVLVPLQCEFFALEGLSQLLKTVEQVRSALNPQLTIHGIVLTMFDPRNNLSGQVVADVRQFMGSKVYETMIPRNVRVSEAPSHGKPVLLYDLKCAGSQAYLRLASEVIQRERALRAA	0	5198	6035	5	NA	NA	NA	no_plot	670291	Microvirga aerophila	TRUE	NA	NA	670291	Microvirga aerophila	186650	Microvirga	119045	Methylobacteriaceae	356	Rhizobiales	28211	Alphaproteobacteria	1224	Proteobacteria	2	Bacteria	131567	cellular organisms
92	NZ_BJYU01000019.1[80715..95984]	Microvirga aerophila	670291	ParB/RepB/Spo0J family partition protein_1	ParB/RepB/Spo0J family partition protein	ParB/RepB/Spo0J family partition protein	WP_114186743.1	92#WP_114186743.1#NZ_BJYU01000019.1[80715..95984]	NA	1	879	MAEEGRSRLGRGLAALIGEVGDEMTVVERGRGQRKVPVEFLRPNPRNPRKAFEDSELKELSQSIKDRGIIQPIVVRPLKNMPDAFEIVAGERRWRAAQVAGLHEVPVVVVEIDDKTSLEYAILENVQRADLNPIEEAQGYSRLMAEFSYTQENLSKIIGKSRSHIANMMRLTDLPDPIKSLLVNKQITAGHGRALLAVKDPQRVAKQILDQGLSVRQVEEIAQADQASPDKPEAKTARPKAEKDPDTRALEKALQDVLGLTVSIDHKGQGGELRIRYKTLDQLDGLCRRLNP	0	6058	6937	6	NA	NA	NA	no_plot	670291	Microvirga aerophila	TRUE	NA	NA	670291	Microvirga aerophila	186650	Microvirga	119045	Methylobacteriaceae	356	Rhizobiales	28211	Alphaproteobacteria	1224	Proteobacteria	2	Bacteria	131567	cellular organisms
93	NZ_BJYU01000019.1[80715..95984]	Microvirga aerophila	670291	tripartite tricarboxylate transporter substrate binding protein_1	tripartite tricarboxylate transporter substrate binding protein	tripartite tricarboxylate transporter substrate binding protein	WP_114186742.1	93#WP_114186742.1#NZ_BJYU01000019.1[80715..95984]	NA	1	993	MSSSSSLTRRTALALAAVVLSSGAALSQTASYPSRPVRIIVPFTAGGTTDIFARLVGEKLSGSLGQQFIIDNRGGAGGNIGTDAVAKAEPDGYTLVMGTVGTHAINASLYAKMPYDPLNDFAPVAYVAGVPNLMVVSPKKVKASTVQEFIAEAKATPNKFNMASSGNGTSIHLSGELFKQMTGIEMPHVPYRGSGPAVNDLIGGQVDVMFDNLPSSIEQVRAGNLRALAVTSAKRSPAVPDMPTLAEAGLPDFEASSWFALFAPKGTPAEITSRLNQEVRKALETPDLQKRFADLGGEIRPMSPEELMAYVKAEHEKWAKVVKTSGAKVD	0	7265	8258	7	tph_c	NA	NA	no_plot	670291	Microvirga aerophila	TRUE	NA	NA	670291	Microvirga aerophila	186650	Microvirga	119045	Methylobacteriaceae	356	Rhizobiales	28211	Alphaproteobacteria	1224	Proteobacteria	2	Bacteria	131567	cellular organisms
94	NZ_BJYU01000019.1[80715..95984]	Microvirga aerophila	670291	GNAT family N-acetyltransferase_1	GNAT family N-acetyltransferase	GNAT family N-acetyltransferase	WP_114186741.1	94#WP_114186741.1#NZ_BJYU01000019.1[80715..95984]	NA	1	849	MSEGELTIRVMERADLDRAIEWAAGEGWNPGFKDADCFQAADPLGFLVATLGHEPIGSISVVRYSDAFGFLGLYIVRPDHRGQGFGYRLWQASMSHLDGCTIGLDGVVAQQSNYARSGFVLAHRNVRFGGSPRIEAPRDERLQPIGPDLIDAVLAYDRPFFAGPRAAFLRCWLSPDTRTAIAFVEDGTVKGYGVIRECRSGFKIGPLFADDESKAALLFQALAARAEGAPVFLDLPESNPAAARLVARHGLSPVFETARMYRGPQPDLPLSRTYGITSFELG	0	8313	9162	8	NA	NA	NA	no_plot	670291	Microvirga aerophila	TRUE	NA	NA	670291	Microvirga aerophila	186650	Microvirga	119045	Methylobacteriaceae	356	Rhizobiales	28211	Alphaproteobacteria	1224	Proteobacteria	2	Bacteria	131567	cellular organisms
95	NZ_BJYU01000019.1[80715..95984]	Microvirga aerophila	670291	DNA polymerase III subunit delta_-1	DNA polymerase III subunit delta	DNA polymerase III subunit delta	WP_114186740.1	95#WP_114186740.1#NZ_BJYU01000019.1[80715..95984]	NA	-1	1020	MVAVKAGEVEGALRRPDPRIGVFLFYGPDIGLINERARAVAERAVDDPADPFQLIRIDGDDIAADPARLADEAGTIGLFGGKRALWVKATSRNIAPAVDAVLKGDLQDTVIVIEGGDLAKSAPLRTLCERSQKALALPCYADTGRDLGAVVDDTLKQGGFSITRDARTALIASLGGDRLATRGELSKLMLYAHGQREITLEDVDAIMSDVSSLAMDAVVDAAFAGEGAGLETGSRRLAAEGVHASVVLGAALRHALMLLSARMAVEEGRPISAVMEGMRSLHFRRKSLVERHLQRWTSESLKQAVAQIQASLLDTRRLADLDDTIASKTLLDLARAARR	0	9162	10182	9	NA	NA	NA	no_plot	670291	Microvirga aerophila	TRUE	NA	NA	670291	Microvirga aerophila	186650	Microvirga	119045	Methylobacteriaceae	356	Rhizobiales	28211	Alphaproteobacteria	1224	Proteobacteria	2	Bacteria	131567	cellular organisms
96	NZ_BJYU01000019.1[80715..95984]	Microvirga aerophila	670291	hypothetical protein_-1	hypothetical protein	hypothetical protein	WP_114186739.1	96#WP_114186739.1#NZ_BJYU01000019.1[80715..95984]	NA	-1	549	MSSLNLKALNIRGLAHIAVVAGLAFGLSACFRPLHGPTASGESLQNVLASIDVPEVKWPDNQARIGHYLRSELIYALNGSGSDVPKRYDLKLSLAQGLTTPIVDSESGRALSATLTGNLTYTLTTADGKTVITQGTATSAATYDRFEQRFATLRAGRDAEIRLARELAQQVRTRLQAALVRS	0	10185	10734	10	NA	NA	NA	no_plot	670291	Microvirga aerophila	TRUE	NA	NA	670291	Microvirga aerophila	186650	Microvirga	119045	Methylobacteriaceae	356	Rhizobiales	28211	Alphaproteobacteria	1224	Proteobacteria	2	Bacteria	131567	cellular organisms
97	NZ_BJYU01000019.1[80715..95984]	Microvirga aerophila	670291	leucine--tRNA ligase_-1	leucine--tRNA ligase	leucine--tRNA ligase	WP_114186738.1	97#WP_114186738.1#NZ_BJYU01000019.1[80715..95984]	NA	-1	2625	MRPERYNAKEAEPKWRKVWNDRDLFRTRNDDPRPKYYVLEMFPYPSGRIHMGHVRNYTMGDVVARYMRAKGFNVLHPMGWDAFGMPAENAAMQNKVHPKEWTYQNIATMRGQLQSMGLAIDWSREIATCDPAYYRHQQRMFLDFLEAGLVDRKTAKVNWDPVDHTVLANEQVIDGRGWRSGALVEQRELTQWFLKITDFAEDLNAKLNTLDRWPEKVRLMQRNWIGRSEGLLVRFALRPETTPAGETELEIYTTRPDTLFGAKFMAVAPDHPLASAAAENNPELAAFIEECKRIGTAQEAIEKAEKLGFDTGIRAVHPFDPNWTLPVYVANFILMEYGTGAIFGCPAHDQRDLDFVNKYGLGNTPVVCPPDQDPQAFVITDTAYDGDGRMINSRFLDGK…	0	10720	13345	11	NA	NA	NA	no_plot	670291	Microvirga aerophila	TRUE	NA	NA	670291	Microvirga aerophila	186650	Microvirga	119045	Methylobacteriaceae	356	Rhizobiales	28211	Alphaproteobacteria	1224	Proteobacteria	2	Bacteria	131567	cellular organisms
98	NZ_BJYU01000019.1[80715..95984]	Microvirga aerophila	670291	YggS family pyridoxal phosphate-dependent enzyme_1	YggS family pyridoxal phosphate-dependent enzyme	YggS family pyridoxal phosphate-dependent enzyme	WP_114186737.1	98#WP_114186737.1#NZ_BJYU01000019.1[80715..95984]	NA	1	678	MSDHNPVEALNSVRAAIHRAASDYERDPSSVTLVAVSKTFPVEDIEPVLAAGQRVFGENYVQEAKAKWPALRERYPDVELHMIGPLQSNKAREAVELFDVIHTLDRSSLAEALAKEIAKSGKRPRLLVQVNTGEEPQKGGVMPAEVDAFIEACRTKHGLAIEGLMCIPPAEDPPSPHFALLNMMAKRNGLSVLSMGMSADFDAAIQLGATHVRVGSAIFGTRPQA	0	13483	14161	12	NA	NA	NA	no_plot	670291	Microvirga aerophila	TRUE	NA	NA	670291	Microvirga aerophila	186650	Microvirga	119045	Methylobacteriaceae	356	Rhizobiales	28211	Alphaproteobacteria	1224	Proteobacteria	2	Bacteria	131567	cellular organisms
99	NZ_BJYU01000019.1[80715..95984]	Microvirga aerophila	670291	L,D-transpeptidase family protein_-1	L,D-transpeptidase family protein	L,D-transpeptidase family protein	WP_114186736.1	99#WP_114186736.1#NZ_BJYU01000019.1[80715..95984]	NA	-1	534	MKRDYVNIIRVFRSPVDHRRGRLVAGNLVLPCALGRSGPRRAKREGDGASPIGRFALLQAFYRADHGPRPRTGLALRRIRPGDGWSDEPRDRRYNRLVPLPYEASHEKMWRNDHLYDVVIDIAWNRGPIIGGRGSAIFLHLARPGFTPTEGCVAVDRRTIRRLMQRIGPRTTIEIVG	0	14190	14724	13	NA	NA	NA	no_plot	670291	Microvirga aerophila	TRUE	NA	NA	670291	Microvirga aerophila	186650	Microvirga	119045	Methylobacteriaceae	356	Rhizobiales	28211	Alphaproteobacteria	1224	Proteobacteria	2	Bacteria	131567	cellular organisms
100	NZ_BJYU01000019.1[80715..95984]	Microvirga aerophila	670291	response regulator transcription factor_1	response regulator transcription factor	response regulator transcription factor	WP_114186735.1	100#WP_114186735.1#NZ_BJYU01000019.1[80715..95984]	NA	1	377	MSNASRLLVVDDDQDLRDTLAEQLGLYDEFRIATAETAAAAIEAVKGDRIDLAIMDVGLPDMDGREAVKLMRQDGFRSPIIMLTGQGSDNDTVMGLEAGANDYVVKPFKFAVLLARIRAQLRQYEASEDAVFQIGPYTFRPGSKLLATEKGSKLKLTEKETAILRYLYRAGQAVVGRETLLTEVWGYNSNVTTHTLETHIYRLRQKIEADPSNARILVTEPGGYKLIP	1	14893	15270	14	NA	NA	NA	no_plot	670291	Microvirga aerophila	TRUE	NA	NA	670291	Microvirga aerophila	186650	Microvirga	119045	Methylobacteriaceae	356	Rhizobiales	28211	Alphaproteobacteria	1224	Proteobacteria	2	Bacteria	131567	cellular organisms
101	NZ_BKDH01000006.1[149441..164732]	Variovorax boronicumulans	436515	ABC transporter permease_-1	ABC transporter permease	ABC transporter permease	WP_159279582.1	101#WP_159279582.1#NZ_BKDH01000006.1[149441..164732]	NA	-1	1097	MSDPTPGWWRRTGIDLRLILMCVLLAVMAVAFSIMSGGVFLSPENLYNVAQQTAVVGIVSTVMVLIIVARHIDLSVGSVMGFVGVLIAYLQYTSGWSWPTACLAGLAVALLVSIYQGWLTAVLGVPSFVVTLGGLMSFRGAAFLVADGKTQPVNDEFFQRLGGGYDGGIGVTASWVLAGLVALVLFGRMVQKRRARQRYDMPTEALWLDVLLTAVPVAVVVGFAWVMNSYQISSKSEPQGIPIPVLIWAAVAIVLSFIVHRTRFGRYVFAMGGNPDAAALVGIPVQRVTLMLFALLAVLVTVAAIVSIARLNAGTNSLGTGMELYVIAAAVIGGTALAGGSGSIFGSVLGALIMQSLDSGMLLLDVPIGKRMVIIGQVLIVAVVFDVLYRRKFGEN	1	0	1097	1	NA	NA	NA	no_plot	436515	Variovorax boronicumulans	TRUE	NA	NA	436515	Variovorax boronicumulans	34072	Variovorax	80864	Comamonadaceae	80840	Burkholderiales	28216	Betaproteobacteria	1224	Proteobacteria	2	Bacteria	131567	cellular organisms
102	NZ_BKDH01000006.1[149441..164732]	Variovorax boronicumulans	436515	D-xylose ABC transporter substrate-binding protein_-1	D-xylose ABC transporter substrate-binding protein	D-xylose ABC transporter substrate-binding protein	WP_159279583.1	102#WP_159279583.1#NZ_BKDH01000006.1[149441..164732]	NA	-1	1029	MQLTTKHTLAALAFGLTAVGAMAQTVVGVSWSNFQEERWKTDEAAIKAQLEKLGAKYISADAGGSPEKQLGDIEGLMSKGAKALIVLAMDKDAILPAVTKATRQKVPVVAYDRLIEAPGVFYITFDNVEVGRMEAREVLKVKPKGNYVIIKGSPSDPNADFLRAGQQEVLDASIKKGDIKIVGDEYTEGWKPEVAQKNMEQILTKNGNKVDAVVAANDGTAGGAVAALTAKGLRGIPVSGQDADFAALNRVALGTQTATIWKDSRELGREAATAAVSLAAGKPVDKAAPWAGGAKKLSLSSRLLTPVPITRDNLDVIVKAGWIKKDELCKGVSGANAPAACK	0	1236	2265	2	NA	NA	NA	no_plot	436515	Variovorax boronicumulans	TRUE	NA	NA	436515	Variovorax boronicumulans	34072	Variovorax	80864	Comamonadaceae	80840	Burkholderiales	28216	Betaproteobacteria	1224	Proteobacteria	2	Bacteria	131567	cellular organisms
103	NZ_BKDH01000006.1[149441..164732]	Variovorax boronicumulans	436515	thiamine pyrophosphate-dependent dehydrogenase E1 component subunit alpha_1	thiamine pyrophosphate-dependent dehydrogenase E1 component subunit alpha	thiamine pyrophosphate-dependent dehydrogenase E1 component subunit alpha	WP_159279584.1	103#WP_159279584.1#NZ_BKDH01000006.1[149441..164732]	NA	1	1023	MDPSNPSGAGEALYRVMVRIRAFENAAETASQGGVSAYGQQAGGAAKVRGPLHLSTGQEAVPAGVCAHLRASDYLTSTHRGHGHTLAKGADLTRMMCELFGKATGFNGGKGGSMHIADFSVGMLGANGVVAAGLPIAVGAAHAQKLLKHGDDITVCFFGDGAINRGPFLEALNWARVYDLPVLFVCEDNRWSATTASGPMTAGDGASARAASMDIAATQVDGNDVFAVHAAAARLVAEVRSGAGPRLLHALTYRVKGHVSVDLAAYRDPAELAAALETDPIARARGHLLDTGVAAATLDAIENAARDEVDTALAVADAAPWPEAGAAFTDVQTTGAGQWL	0	2740	3763	3	NA	NA	NA	no_plot	436515	Variovorax boronicumulans	TRUE	NA	NA	436515	Variovorax boronicumulans	34072	Variovorax	80864	Comamonadaceae	80840	Burkholderiales	28216	Betaproteobacteria	1224	Proteobacteria	2	Bacteria	131567	cellular organisms
104	NZ_BKDH01000006.1[149441..164732]	Variovorax boronicumulans	436515	alpha-ketoacid dehydrogenase subunit beta_1	alpha-ketoacid dehydrogenase subunit beta	alpha-ketoacid dehydrogenase subunit beta	WP_159279585.1	104#WP_159279585.1#NZ_BKDH01000006.1[149441..164732]	NA	1	963	MALTTLSYSEAAVRALQQEMDADPRVVVLGEDVGRGGIFGQYKGLQQQYGAERVIDTPISEAAIMGAGVGMALAGLRPVVEMRVVDFALCGMDELVNQAAKNRFMFGGQGRVPLVARMPGGIWDASAAQHSQSLEAWFAHLPGVVVVSPSTPQDNHGLLRAALQCGDPVVYIEHKTLWGLRGEVDDTLAVPLGQAARVREGNALTLVSWSKQMQPCAAACDALAAEGIAVDLIDLRTLWPWDRETVLSSCARTGRLLVVHEAVQAAGFGAEIAASAAEATGCRVARLGAPRIPVGYAPVLEAQSRVGVDAIVAAAKKLAG	0	3753	4716	4	NA	NA	NA	no_plot	436515	Variovorax boronicumulans	TRUE	NA	NA	436515	Variovorax boronicumulans	34072	Variovorax	80864	Comamonadaceae	80840	Burkholderiales	28216	Betaproteobacteria	1224	Proteobacteria	2	Bacteria	131567	cellular organisms
105	NZ_BKDH01000006.1[149441..164732]	Variovorax boronicumulans	436515	winged helix-turn-helix transcriptional regulator_1	winged helix-turn-helix transcriptional regulator	winged helix-turn-helix transcriptional regulator	WP_070062984.1	105#WP_070062984.1#NZ_BKDH01000006.1[149441..164732]	NA	1	450	MDPLFFKLVRVVNLTARPFHERVGREHQLTLNEWRAMAVLAAQPGLSATQVADLTGLDKMAVSRALAGLKRHQRVQRRSDPTDQRCSRLYLTAAGKALHATVGALGRQREAELFAGVDASELARLSDTLDTLIRAVERAPDSGTAGQTV	0	4737	5187	5	NA	NA	NA	no_plot	436515	Variovorax boronicumulans	TRUE	NA	NA	436515	Variovorax boronicumulans	34072	Variovorax	80864	Comamonadaceae	80840	Burkholderiales	28216	Betaproteobacteria	1224	Proteobacteria	2	Bacteria	131567	cellular organisms
106	NZ_BKDH01000006.1[149441..164732]	Variovorax boronicumulans	436515	SDR family oxidoreductase_-1	SDR family oxidoreductase	SDR family oxidoreductase	WP_159279586.1	106#WP_159279586.1#NZ_BKDH01000006.1[149441..164732]	NA	-1	768	MASISVSSSLVLAGKVAFVTGGSRGIGAAIVRRLARDGAAVAFTYVSAQAEADKLAGEIQAAGGRALAIRADAGDAAALTAAIAQGARAFERLDILVNNAGVYLGGELDTFSLEDFDRTIDVNVRATFVAVQAAARHMGDGTGRIVNIGSINAERVLDAGASVYAMSKAAIVGLTRGLARDLGARGITVNNVQPGPIDTAMNPATGPRAASMHDVMVLPRHGRAEEIAGMVAYLVGPDGGFVTGANLSVDGGYTV	0	5174	5942	6	NA	NA	NA	no_plot	436515	Variovorax boronicumulans	TRUE	NA	NA	436515	Variovorax boronicumulans	34072	Variovorax	80864	Comamonadaceae	80840	Burkholderiales	28216	Betaproteobacteria	1224	Proteobacteria	2	Bacteria	131567	cellular organisms
107	NZ_BKDH01000006.1[149441..164732]	Variovorax boronicumulans	436515	LysR family transcriptional regulator_1	LysR family transcriptional regulator	LysR family transcriptional regulator	WP_159279587.1	107#WP_159279587.1#NZ_BKDH01000006.1[149441..164732]	NA	1	930	MEPLNHLESFVQSAEGGSFSAAARRLGLTPAAVSKNVARLEARLGVRLFQRSTRRLTLTEAGERFLAQVGGALATLQDAVASLAQDDGQPSGTLKVSMGQAFGREHVLPFMGDFLARYPGIVPDWHFDNQQVDLVGEGFDAAIGGGIALSPGVVARELARIHVVAVAAPAYLAGRALPAHPSELARFDVLLRRSSPTGRLRPWTLRHASGEETMVELPQRPRAIFNDPEAIAQAALLGLGVAMLPMPFVERGLRSGALVRLLPGWYQDSGAVWIYYPSKKLLPPKTRVFVDFVLARFREAKFAQRMQVG	0	6065	6995	7	NA	NA	NA	no_plot	436515	Variovorax boronicumulans	TRUE	NA	NA	436515	Variovorax boronicumulans	34072	Variovorax	80864	Comamonadaceae	80840	Burkholderiales	28216	Betaproteobacteria	1224	Proteobacteria	2	Bacteria	131567	cellular organisms
108	NZ_BKDH01000006.1[149441..164732]	Variovorax boronicumulans	436515	tripartite tricarboxylate transporter substrate binding protein_1	tripartite tricarboxylate transporter substrate binding protein	tripartite tricarboxylate transporter substrate binding protein	WP_159279588.1	108#WP_159279588.1#NZ_BKDH01000006.1[149441..164732]	NA	1	1038	MTSISRSSSSVTSSTRRFALVATAAATLALLGGAAHAQATWPTKPVRIVVPFAAGGTTDILARAVAPELSKAFGQQFIVDNRAGAGGNVGAEIVARSPNDGYTLLMGTVGTHGINRALYPKLPFDPIKDFAPITLVAAVPNVMEMNAEKAKSLNIRNVQDFIKYAKANPGKLNMASSGSGTSIHLAGELFKSMTGTFMAHIPYKGSGPALLDMVGGNADVMFDNLPSSMAQIKGGKLTALAVTSSQRSPALPDVPTVEEAGGPALKGYEASSWFGLLAPAGTSPEIVNRIQQEVAKSLGTPAIKEKMLAQGAIPSGNSPADFTKLIASEHVKWAKVVKDSGAKVD	0	7066	8104	8	tph_c	NA	NA	no_plot	436515	Variovorax boronicumulans	TRUE	NA	NA	436515	Variovorax boronicumulans	34072	Variovorax	80864	Comamonadaceae	80840	Burkholderiales	28216	Betaproteobacteria	1224	Proteobacteria	2	Bacteria	131567	cellular organisms
109	NZ_BKDH01000006.1[149441..164732]	Variovorax boronicumulans	436515	DUF1840 domain-containing protein_-1	DUF1840 domain-containing protein	DUF1840 domain-containing protein	WP_159279589.1	109#WP_159279589.1#NZ_BKDH01000006.1[149441..164732]	NA	-1	330	MLYRFKSRAAPDFVMLEVHARQLLDIVGKPAAPQGIITVEQIPGAIAALEAALAHESSKPAPHNHDEHVVEGHDADAEKQHVGLHQRAAPLLHMLKDSQAESKDVTWGT	0	8229	8559	9	NA	NA	NA	no_plot	436515	Variovorax boronicumulans	TRUE	NA	NA	436515	Variovorax boronicumulans	34072	Variovorax	80864	Comamonadaceae	80840	Burkholderiales	28216	Betaproteobacteria	1224	Proteobacteria	2	Bacteria	131567	cellular organisms
110	NZ_BKDH01000006.1[149441..164732]	Variovorax boronicumulans	436515	class I SAM-dependent methyltransferase_-1	class I SAM-dependent methyltransferase	class I SAM-dependent methyltransferase	WP_159279590.1	110#WP_159279590.1#NZ_BKDH01000006.1[149441..164732]	NA	-1	1269	MQHLIPKIESQLASLPVPIALELPDGRRVAQAGSRVTLAFKEWSVLAKLAGRQVGAIGEAYVEGKVQIEGAMRDLIDATVGLLPGNPAETDTTWWSRLQRRAKSRGSHSLRKDAAQIEFHYDVSDDFYALWLDPRRVYSCAYFRTPELTLAQAQEAKLDHICRKLMLQPGERYLDIGSGWGALLLWAAEHYGVDATGITLSKNQHAHVQRLIEEKGLQGRVRVELRDYRELPDDQPFDKISSVGMFEHVGAANMPTYFHKIHTLLKPGGLVLNHGITSGELNYRQLGAGMGDFIEKYIFPGGELLHVTHVLRETAAAGLEMVDTESLRPHYARTLWAWSDALEAQLDAAREVLGRSGGRQGENAERILRAYRLYLAGSAMSFEQGWISLHQMLSTKPDG…	0	8576	9845	10	NA	NA	NA	no_plot	436515	Variovorax boronicumulans	TRUE	NA	NA	436515	Variovorax boronicumulans	34072	Variovorax	80864	Comamonadaceae	80840	Burkholderiales	28216	Betaproteobacteria	1224	Proteobacteria	2	Bacteria	131567	cellular organisms
111	NZ_BKDH01000006.1[149441..164732]	Variovorax boronicumulans	436515	bifunctional salicylyl-CoA 5-hydroxylase/oxidoreductase_1	bifunctional salicylyl-CoA 5-hydroxylase/oxidoreductase	bifunctional salicylyl-CoA 5-hydroxylase/oxidoreductase	WP_159279591.1	111#WP_159279591.1#NZ_BKDH01000006.1[149441..164732]	NA	1	2385	MNSLTSPRLAPASDLQRILCIGGGPAGLYFALLMKARNPALQITVVERNRPFDTFGWGVVLSDQTLGNLRAADGPTAALIGNEFHHWDDIQVFFKDRQVRSGGHGFCGIGRKRLLNILQERCLELGVELVFETDATDDQAIAAQYKADLVIASDGLNSRIRQRYADVFKPDIDLRNCRFVWLGTHQTFDAFTFAFEQTEHGWFQAHAYQFDDKTSTFIVETPEAVWKAHGLDQMEQPEAIAFCEKLFAKYLGGHSLISNATHLRGSANWIRFPRVVCERWTHRIDVEGRSVPVVLMGDAAHTAHFSIGSGTKLALEDAIDLANEFAQGGTVDHVLEGYEARRSVEVLKIQNAARNSTEWFENVPRYTGMEIEQFAYSLLTRSQRISHENLRVRDTQWLG…	0	9964	12349	11	NA	NA	NA	no_plot	436515	Variovorax boronicumulans	TRUE	NA	NA	436515	Variovorax boronicumulans	34072	Variovorax	80864	Comamonadaceae	80840	Burkholderiales	28216	Betaproteobacteria	1224	Proteobacteria	2	Bacteria	131567	cellular organisms
112	NZ_BKDH01000006.1[149441..164732]	Variovorax boronicumulans	436515	MarR family transcriptional regulator_1	MarR family transcriptional regulator	MarR family transcriptional regulator	WP_056576953.1	112#WP_056576953.1#NZ_BKDH01000006.1[149441..164732]	NA	1	480	MDLEARAHSEHPEALRLWLRLLTCTQLVEKQVRNGLRAQFATTLPRFDLMSQLERSPDGLKMNELSRRMMVTGGNVTGITDQLVTEGLVERINVEGDRRAWRVRLTPRGRKLFNEMAQQHEDWIVEAFSSLNPKEIAQLHKLLGKVKQHSHSSQLAETA	0	12350	12830	12	NA	NA	NA	no_plot	436515	Variovorax boronicumulans	TRUE	NA	NA	436515	Variovorax boronicumulans	34072	Variovorax	80864	Comamonadaceae	80840	Burkholderiales	28216	Betaproteobacteria	1224	Proteobacteria	2	Bacteria	131567	cellular organisms
113	NZ_BKDH01000006.1[149441..164732]	Variovorax boronicumulans	436515	enoyl-CoA hydratase family protein_1	enoyl-CoA hydratase family protein	enoyl-CoA hydratase family protein	WP_159279592.1	113#WP_159279592.1#NZ_BKDH01000006.1[149441..164732]	NA	1	855	MKHYIGASNPMRTQFEPKADYKAEHFAWRYEAGVGTITLNRPERKNPLTFDSYAELRDLFRALTYATDVKVIVVTGAGGNFCSGGDVHEIIGPLTGMRMPELLEFTRMTGDLVKAIRNCPQPIIGAIDGVCAGAGAMIALACDLRYGTPATRTAFLFTRVGLAGADMGACALLPRVIGQGRASELLFTGRAMTADEGQAWGFFNALHDSASLLDAATKVARDLAEGPSFAHGMTKTMLAQEWSMTIDQAIEAEAQAQAICMQTEDFKRAYEAFAAKRKPVFGGD	0	12826	13681	13	NA	NA	NA	no_plot	436515	Variovorax boronicumulans	TRUE	NA	NA	436515	Variovorax boronicumulans	34072	Variovorax	80864	Comamonadaceae	80840	Burkholderiales	28216	Betaproteobacteria	1224	Proteobacteria	2	Bacteria	131567	cellular organisms
114	NZ_BKDH01000006.1[149441..164732]	Variovorax boronicumulans	436515	acyl-CoA dehydrogenase family protein_1	acyl-CoA dehydrogenase family protein	acyl-CoA dehydrogenase family protein	WP_139700616.1	114#WP_139700616.1#NZ_BKDH01000006.1[149441..164732]	NA	1	1194	MMTKIPAPPSTAHLALPFFDDAHRALANDLLPWCAAQEIDERDDRAACREWVRRLGDAGWLRYAVPGSAGGALERLDSRALVLLRETLGYHSPLADFAFAMQGLGSGAITLDGTPEQQSQYLTAVGQGKKIAAFALSEPEAGSDVAAMAMRAEPTADGWRLNGEKTWISNGGIADFYCVFAKTDPTAGTRGITVFIVDATTPGLDTSAHIDVMAPHPLATLRFDNCVVPRTAQLGTLNGGFKLAMRTLDIFRASVAAAALGMGRRALAEAIAHAKGRRMFGQTLADFQLTQAKLGEMAALIDSAALLTYRAAWMRDDAERRGAPAVGDVSAAAAMAKMCATENASRVIDMALQMHGGLGVKVGTKIESLYRDIRSLRIYEGATEVQQLIIGKSVLRG	0	13689	14883	14	NA	NA	NA	no_plot	436515	Variovorax boronicumulans	TRUE	NA	NA	436515	Variovorax boronicumulans	34072	Variovorax	80864	Comamonadaceae	80840	Burkholderiales	28216	Betaproteobacteria	1224	Proteobacteria	2	Bacteria	131567	cellular organisms
115	NZ_BKDH01000006.1[149441..164732]	Variovorax boronicumulans	436515	AMP-binding protein_1	AMP-binding protein	AMP-binding protein	WP_159279593.1	115#WP_159279593.1#NZ_BKDH01000006.1[149441..164732]	NA	1	405	MSAQVDRFVHDRLPPAAQLPVFRYDLPELQFPDQLNLVEELLDKAVAKGFGDKPMLRSPAGVLTYAQAGVEVNRIAQVLVEDLGLVPGNRVLLRGGNSVWMALSWLAVVKAGLIAVATMPLLRAKELGEIIEKSQPVAALCEGRLLEELVAAQQAHPVLATVIAFNQPDAPDSLSARAASKSGVFQACPTAADDIALLAFTSGTTGKPKAPVTTHRDVVAMCQTWPRHVLRARSDDIVVGTPPLAFTFGLGGLLIFPMWAGASVYFPEGAFSPEALVKLINEVGATICYTAPTFYRQMAPFVRQHGAPSLRICVSAGEALPDATRQLWKETTGIEMLDGIGGTEVFHIYISAAGDEVRRGAVGKAVPGFTAKVVDDQGNEVPRGTVGKLALQGPVGCRY…	1	14887	15292	15	NA	NA	NA	no_plot	436515	Variovorax boronicumulans	TRUE	NA	NA	436515	Variovorax boronicumulans	34072	Variovorax	80864	Comamonadaceae	80840	Burkholderiales	28216	Betaproteobacteria	1224	Proteobacteria	2	Bacteria	131567	cellular organisms
116	NZ_BKDH01000006.1[52309..67093]	Variovorax boronicumulans	436515	MarR family transcriptional regulator_1	MarR family transcriptional regulator	MarR family transcriptional regulator	WP_159279528.1	116#WP_159279528.1#NZ_BKDH01000006.1[52309..67093]	NA	1	453	MPTKPNTDDLLKLDNQLCFAVYSASLAMTRLYKPLLEKLQLTYPQYLVMLALWEQDGPTVSALGERLSLDSGTLTPLLKRLEANGYVARVRDVADERRVHITLTAAGRKLKSRAANVPECLMAAAECSVPELIALTQQIQTLRDRIRKAA	0	758	1211	1	NA	NA	NA	no_plot	436515	Variovorax boronicumulans	TRUE	NA	NA	436515	Variovorax boronicumulans	34072	Variovorax	80864	Comamonadaceae	80840	Burkholderiales	28216	Betaproteobacteria	1224	Proteobacteria	2	Bacteria	131567	cellular organisms
117	NZ_BKDH01000006.1[52309..67093]	Variovorax boronicumulans	436515	organic hydroperoxide resistance protein_1	organic hydroperoxide resistance protein	organic hydroperoxide resistance protein	WP_062481095.1	117#WP_062481095.1#NZ_BKDH01000006.1[52309..67093]	NA	1	426	MTTKLDKVLYTAEAHTVGGRDGAGKSSDGAIDVKLSSPGSGKPGTNPEQLFAVGYAACFIGAMKAVGPKISVKVPEEVAIDSKVSLGPTNGGAAYGISVQLAISLPGLDDAQKKLLVDTAHQVCPYSNATRGNIDVELTIV	0	1290	1716	2	NA	NA	NA	no_plot	436515	Variovorax boronicumulans	TRUE	NA	NA	436515	Variovorax boronicumulans	34072	Variovorax	80864	Comamonadaceae	80840	Burkholderiales	28216	Betaproteobacteria	1224	Proteobacteria	2	Bacteria	131567	cellular organisms
118	NZ_BKDH01000006.1[52309..67093]	Variovorax boronicumulans	436515	DUF2855 family protein_1	DUF2855 family protein	DUF2855 family protein	WP_159279529.1	118#WP_159279529.1#NZ_BKDH01000006.1[52309..67093]	NA	1	1119	MSTTHLLIRKDQLATARLHTDTTERPLADGQVRVRIDSFALTSNNITYAAFGDAMSYWQFFPSEEEGWGSIPVWGFASVVQSQHPGVAVGERIYGYWPMSTSAVLSPDRLSPSRFTDAAAHRAELPAVYNQYFRCNADPLYTTDTEDLQALLRPLFITSWLIDDFMADNDFFGATTMLLSSASSKTAYGTAFQLHQRDGIEVVGLTSPANVAFCQSLGCYDRVVTYDALDTIAADTPCVYIDFAGNGELRTAIHERFTNLKYSSSIGGTHVEQLAAKGAGKSLTGPRATLFFAPAQIKKRTTEWGADEFGRRMVAAWHRFLATVTDASNPWLHTEHHHGGEAVQAAYAQVLAGKGDPRTGHILSLYKQAGAR	0	1906	3025	3	NA	NA	NA	no_plot	436515	Variovorax boronicumulans	TRUE	NA	NA	436515	Variovorax boronicumulans	34072	Variovorax	80864	Comamonadaceae	80840	Burkholderiales	28216	Betaproteobacteria	1224	Proteobacteria	2	Bacteria	131567	cellular organisms
119	NZ_BKDH01000006.1[52309..67093]	Variovorax boronicumulans	436515	serine/threonine protein kinase_1	serine/threonine protein kinase	serine/threonine protein kinase	WP_070063054.1	119#WP_070063054.1#NZ_BKDH01000006.1[52309..67093]	NA	1	1044	MTPSSVAPANTHPYESLTPDVVLDALATLGLHGDGRLTGLNSYENRVYQVYLEDPNPHPAVVLKFYRPGRWSEAEILEEHAFSLELAAGEVPAVPPLAFDGKTLHHHAGFAFSVSPYRGGRAPELDNFEVLEWVGRFLARIHTVGSAKPFEARPALDLQTFGLDSRDWLLENDKIPLDMQRDWEKICNEALDMVRATALALQPPASDFKPRKLRLHGDVHPGNILWTPTDRPGGGPHFVDLDDARTGFAVQDLWMLLSGDRAQRTAQLSGLLDGYEQFREFDRRELALIEPLRTLRLIHYSAWLARRWEDPIFPINFPWFGSSDYWKGQILVLEDQCEQMAEEPLYA	0	3058	4102	4	NA	NA	NA	no_plot	436515	Variovorax boronicumulans	TRUE	NA	NA	436515	Variovorax boronicumulans	34072	Variovorax	80864	Comamonadaceae	80840	Burkholderiales	28216	Betaproteobacteria	1224	Proteobacteria	2	Bacteria	131567	cellular organisms
120	NZ_BKDH01000006.1[52309..67093]	Variovorax boronicumulans	436515	LysR family transcriptional regulator_-1	LysR family transcriptional regulator	LysR family transcriptional regulator	WP_159279530.1	120#WP_159279530.1#NZ_BKDH01000006.1[52309..67093]	NA	-1	897	MELRHLRYFSVLAEELHFGRAARRLAISQPPLSVAIRQLEDSVGARLFERNSKEVRLTPAGEALRVSARRVLLQAEEAALEARDVATGSAGRLRIGFVGAMLYRGLPPALRAFQARHPAVRITLSELNSGVQIAELLHDRLDLGFVHTSRMPAELRHRLLLSEPFVACLPAGHALARKRVLAPADLRDQPFVLFSREASPDYHERILSICADAGFLPEVRHEVRHWLAVVSLVSQGMGVALVPQAMRHSALRGAVFRPLDRAVAQSEAYGVWRTGPVNVLVERLLEGVAQSLAANAAQ	0	4102	4999	5	NA	NA	NA	no_plot	436515	Variovorax boronicumulans	TRUE	NA	NA	436515	Variovorax boronicumulans	34072	Variovorax	80864	Comamonadaceae	80840	Burkholderiales	28216	Betaproteobacteria	1224	Proteobacteria	2	Bacteria	131567	cellular organisms
121	NZ_BKDH01000006.1[52309..67093]	Variovorax boronicumulans	436515	acyl-CoA dehydrogenase family protein_1	acyl-CoA dehydrogenase family protein	acyl-CoA dehydrogenase family protein	WP_159279531.1	121#WP_159279531.1#NZ_BKDH01000006.1[52309..67093]	NA	1	1710	MPTPAASAATAAAHPIPDRHGQNLFTTDTELHMLLALYLPEALRTHMRPHFERLGGLAGGLLDDLAGTADRNPPTLKQRTRTGIDEQKVIKHPAYVEMERLALSEFGLAAISHRDETLGWAGKMPPLVKYVLTYLFVQAEFGLCCPVSMTDSLTRTLKKFGAPELVAKYLPRLTSLDFDELAQGAMFMTEQAAGSDIAATATTAQRQADGSWRLAGDKWFCSNPDAGFAMVLARADDAPAGMKGVSLFLLPRELDDGSLNHYRIIRLKDKLGTRSMASGEIRLEGAVAYLVGEEGRGFQQMADMVNNSRLSNGVRSAGLMRRAVAEAEYIASERRAFGRALEQMPLMQRQLDKLRVPSEQARTMVCQTAQALARSDAGEPDAYALLRILTPLIKFRACR…	0	5089	6799	6	NA	NA	NA	no_plot	436515	Variovorax boronicumulans	TRUE	NA	NA	436515	Variovorax boronicumulans	34072	Variovorax	80864	Comamonadaceae	80840	Burkholderiales	28216	Betaproteobacteria	1224	Proteobacteria	2	Bacteria	131567	cellular organisms
122	NZ_BKDH01000006.1[52309..67093]	Variovorax boronicumulans	436515	tripartite tricarboxylate transporter substrate binding protein_1	tripartite tricarboxylate transporter substrate binding protein	tripartite tricarboxylate transporter substrate binding protein	WP_159279532.1	122#WP_159279532.1#NZ_BKDH01000006.1[52309..67093]	NA	1	990	MRQRLSLILGTACAALLLAATPTAQAQPGAFPTKPMTLVVPFPPGGPTDAMARTLAAELRDKLGQPMIVENRAGAGGNIGADYVARAEADGHTLLFGTSGPLAINVSLYRKISYDPTKSFAPVIQVGYLPNILVVNPALPVKNVAELVAYAKANPGKLSYASSGNGASSHLAGVLFNSVAGTDLLHVPYKGTGPALNDLLGNQVSMTFTDILTALPYVKAGKLRALGVATSARSQALPEVPTLTEQLHKPYDVSVFFGIVAPAGTPADRVTKLNHAFAEVLNSPKVKQMFAAQGLEATADTSPQKLAQFIGSETAKWKDVVKKSGAQLD	0	6833	7823	7	tph_c	NA	NA	no_plot	436515	Variovorax boronicumulans	TRUE	NA	NA	436515	Variovorax boronicumulans	34072	Variovorax	80864	Comamonadaceae	80840	Burkholderiales	28216	Betaproteobacteria	1224	Proteobacteria	2	Bacteria	131567	cellular organisms
123	NZ_BKDH01000006.1[52309..67093]	Variovorax boronicumulans	436515	tripartite tricarboxylate transporter substrate binding protein_1	tripartite tricarboxylate transporter substrate binding protein	tripartite tricarboxylate transporter substrate binding protein	WP_159279533.1	123#WP_159279533.1#NZ_BKDH01000006.1[52309..67093]	NA	1	969	MKTQRLSRLIAVAALFAAAGTATAETYPQRPVTLIVPYAAGGPTDQHLRAVAEEAGKALGQPVVLDNRPGASGTNGAAALVRAAPDGYTLAVLPASVYREPFINKVAFDPARSFSYVVMLSDYTFGLAVKADAPWKTWQDFAADAARRPGKLNVGATGAVGTPRIVMDEAAEMAKVQLNMVPFKGDAEVTNAILGGHIDAAPLSGVAVPHIDAGKMRYLVMLTPQRVKRYPQVSTLREQGVDAVIDSPYGIAGPAGMDPARVKTVHDAFRKALASPAGLRVLEQLNQQANAMDPEQYRRYALATTAREKERVARLRQRGLLD	0	7860	8829	8	NA	NA	NA	no_plot	436515	Variovorax boronicumulans	TRUE	NA	NA	436515	Variovorax boronicumulans	34072	Variovorax	80864	Comamonadaceae	80840	Burkholderiales	28216	Betaproteobacteria	1224	Proteobacteria	2	Bacteria	131567	cellular organisms
124	NZ_BKDH01000006.1[52309..67093]	Variovorax boronicumulans	436515	hotdog fold thioesterase_1	hotdog fold thioesterase	hotdog fold thioesterase	WP_159279534.1	124#WP_159279534.1#NZ_BKDH01000006.1[52309..67093]	NA	1	447	MQDPAFIDEPAGVLFGLPMPMARAFALRGEAIGDERARVRMPYSADHTNSRGDVHGGAIAVLFDCALSSAVRSHAPTAFGVVTVDITVHYTAPCAGDVIATAVCERRGRAMCFARGEARNADGELLALATGTFKLVPRTAPSSSESIP	0	8845	9292	9	NA	NA	NA	no_plot	436515	Variovorax boronicumulans	TRUE	NA	NA	436515	Variovorax boronicumulans	34072	Variovorax	80864	Comamonadaceae	80840	Burkholderiales	28216	Betaproteobacteria	1224	Proteobacteria	2	Bacteria	131567	cellular organisms
125	NZ_BKDH01000006.1[52309..67093]	Variovorax boronicumulans	436515	CoA transferase_1	CoA transferase	CoA transferase	WP_159279535.1	125#WP_159279535.1#NZ_BKDH01000006.1[52309..67093]	NA	1	1149	MTTAPSSTGALAGIRVLDISRILGGPYCGQILGDHGADVLKVEPPQGDDTRTWGPPFKEGVASYYHGLNRNKRVQHLDFSTEEGREALLALVAEADVLIENFKTGTMERWGIGYETLSQRFPRLVWCRVSGFGADGPLGALPGYDAAVQAMTGIMSINGEADGGPLRVGLPVVDMVTGLNAVIGVLLALQERHRSGRGQFVEAALYDSGLSLLHPHAANWFMDGTAPRRTGNAHPNIYPYDALATGTDPIFVAVGNDRQFASFCRCIGLPALADDPLYRTAGARSVNRDGLKQQLEAALAAFDGRTLVDQLMAAGVPAAPVLPVAAALQHPHTLHREMVVEMEGGYRGIGAPVKLSRTPASYRHAPLTPGDSFLPSDDSAAR	0	9288	10437	10	NA	NA	NA	no_plot	436515	Variovorax boronicumulans	TRUE	NA	NA	436515	Variovorax boronicumulans	34072	Variovorax	80864	Comamonadaceae	80840	Burkholderiales	28216	Betaproteobacteria	1224	Proteobacteria	2	Bacteria	131567	cellular organisms
126	NZ_BKDH01000006.1[52309..67093]	Variovorax boronicumulans	436515	tripartite tricarboxylate transporter substrate binding protein_-1	tripartite tricarboxylate transporter substrate binding protein	tripartite tricarboxylate transporter substrate binding protein	WP_159279619.1	126#WP_159279619.1#NZ_BKDH01000006.1[52309..67093]	NA	-1	975	MPDLKRRRLAALLGLVAGTAWAQQPDDTARPIRWIVPFPTGAIADVVARAIGAQLTIDTGQPVQIENRPGGNTALAALEAARAPADGHTVLSADNGMWVFNPALYRNLSYSPSRDFTPVTQLVRLPMVLLVGPASGVRDARAFIEDARAFPGCFSFASAGNGSAQHLAMELLAREAGLEMVHVPYRSAGPALVEVAGGQLPFAMGELATARRFIQGGRLRVLAVANPARLAQWPGVPTFAELGLPKVEAAIFHGLVAPAGTPPEVVARLQRAVASALHNPVVQRRLAEAGVEPVGGTPAEFETLLARESARWHPLIRALKLSLD	0	10442	11417	11	NA	NA	NA	no_plot	436515	Variovorax boronicumulans	TRUE	NA	NA	436515	Variovorax boronicumulans	34072	Variovorax	80864	Comamonadaceae	80840	Burkholderiales	28216	Betaproteobacteria	1224	Proteobacteria	2	Bacteria	131567	cellular organisms
127	NZ_BKDH01000006.1[52309..67093]	Variovorax boronicumulans	436515	VWA domain-containing protein_-1	VWA domain-containing protein	VWA domain-containing protein	WP_062482648.1	127#WP_062482648.1#NZ_BKDH01000006.1[52309..67093]	NA	-1	1215	MSANPTPIDEEETLPPTDRLQRWRLVLGSEANASCGAIEGRVREIDQALAALYEADGRRGLGQGGQRGGRGDSAPSVARWLGDIRKYFPSQVVQVMQRDAMERLNLRQMLLQPEMLENAQPDVHLVANLVALASVIPAGTKDTARAVVRKVVDELMKKLEEPMRSAVSGALNRSQRNRRPRHSEIDWHRTIRANLRHWQPEYRTVVPQTLVGYGRKARQPQREVILCIDQSGSMAASVVYSSIFGAVMASLPAVSTKLVVFDTAVVDMTEQLQDPVDLLFGVQLGGGTDINGAVGYCQTLVREPRNTILILISDLYEGGVEDGLLRRAHQLVEAGVQFIALLALSDEGAPSYDRDLAAKLAALGVPSFACTPDAFPGLMAAAIKREDVSTWAAGQGLKT…	0	11428	12643	12	NA	NA	NA	no_plot	436515	Variovorax boronicumulans	TRUE	NA	NA	436515	Variovorax boronicumulans	34072	Variovorax	80864	Comamonadaceae	80840	Burkholderiales	28216	Betaproteobacteria	1224	Proteobacteria	2	Bacteria	131567	cellular organisms
128	NZ_BKDH01000006.1[52309..67093]	Variovorax boronicumulans	436515	hypothetical protein_-1	hypothetical protein	hypothetical protein	WP_159279536.1	128#WP_159279536.1#NZ_BKDH01000006.1[52309..67093]	NA	-1	2146	MSTSAAPSPLHYFGIRHHGPGCARSLLRAFESLQPDCILVEGPPEAEPLLSFLAHADLQPPVAVLIHASEDTGLAAFYPFATFSPEWQALQWGAARGVPTRFIDLPQAHRMAIEQAARVADEAKAQAPEETPLDDDETDTVPVAETVDAPEEEQAANTLPDDPFDWLAHAAGYADGESWWNHMVEERGDGEDLFGAIAEAMTAVRAETPEDRRGVRAMEREQRREAFMRQSIREAVKAGHQRIAVVCGAWHVPALQGAATAKADAALLKGLPKLKVLATWVPWTYRHLTSASGYGAGIDSPGWYEHLWQQGHEVAGRSTGWLARVARLLREHDLDCSSAHLIEATRLADTLAALRERPAPGLPELDEAVRSVICMGEQAPLTLIRERLTVGDRMGQVPA…	1	12639	14785	13	NA	NA	NA	no_plot	436515	Variovorax boronicumulans	TRUE	NA	NA	436515	Variovorax boronicumulans	34072	Variovorax	80864	Comamonadaceae	80840	Burkholderiales	28216	Betaproteobacteria	1224	Proteobacteria	2	Bacteria	131567	cellular organisms
129	NZ_CAADFC020000008.1[206664..221710]	Bradyrhizobium ivorense	2511166	DNA primase_-1	DNA primase	DNA primase	WP_139859122.1	129#WP_139859122.1#NZ_CAADFC020000008.1[206664..221710]	NA	-1	1533	MRFTPEFLDELRARLPVSEVVGRRVKLKKAGREWKGLSPFQQEKTPSFFVNDQKQAWFDFSSGLNGNIFDFLMKTEGVTFPEAVERLAAMAGVPLPAVTADAARHEQHRRTLHDVMELAAKFFADTLASRHGAKARGYLADRGLSPATQLQFRMGYAPPDRFALKEHLGAQGISTEDMVEAGLLVSGEDKPVPFDRFRDRVMFPITDARGRVIAFGGRALEKDVPAKYLNSPETTLFHKGDNLYNLFTARQAAHDGAQLIVVEGYVDVIAMVTSGFPGAVAPLGTALTENQLALLWKMADEPLLCFDGDRAGQKAAYRAADLALPHLKPGKSLRFALLPEGQDPDDLARSGGRGAIEEVISAARPLADMIWSREIEGGSYGTPERRAALEARIGELTNG…	1	0	1533	1	NA	1	3'H	no_plot	2511166	Bradyrhizobium ivorense	TRUE	NA	NA	2511166	Bradyrhizobium ivorense	374	Bradyrhizobium	41294	Bradyrhizobiaceae	356	Rhizobiales	28211	Alphaproteobacteria	1224	Proteobacteria	2	Bacteria	131567	cellular organisms
130	NZ_CAADFC020000008.1[206664..221710]	Bradyrhizobium ivorense	2511166	chlorite dismutase family protein_1	chlorite dismutase family protein	chlorite dismutase family protein	WP_139859124.1	130#WP_139859124.1#NZ_CAADFC020000008.1[206664..221710]	NA	1	555	MFTTFRGGQSGGWKVTSIARIKGETLPKVAALSVIASEAIALPLLPSQTAWRLAGVASHLRYTEKAEKEQLAAVQAGLGRSEATQAALIPIRKSAAWWELTQDERRQIFEDKSHHISGTLKYLPAIARQLYHSRDLGVPFDFLTWFEFAPEHAALFDELVAMLRATEEWNYVEREVDVRVEREI	0	1832	2387	2	NA	1	3'H	no_plot	2511166	Bradyrhizobium ivorense	TRUE	NA	NA	2511166	Bradyrhizobium ivorense	374	Bradyrhizobium	41294	Bradyrhizobiaceae	356	Rhizobiales	28211	Alphaproteobacteria	1224	Proteobacteria	2	Bacteria	131567	cellular organisms
131	NZ_CAADFC020000008.1[206664..221710]	Bradyrhizobium ivorense	2511166	helix-turn-helix domain-containing protein_-1	helix-turn-helix domain-containing protein	helix-turn-helix domain-containing protein	WP_139859304.1	131#WP_139859304.1#NZ_CAADFC020000008.1[206664..221710]	38	-1	735	MAGLAKGLAILEAFSPRRRRLTITEAAEVSGTSRASARRCLLTLAELGYLDFDGKYFRPQARLLALSSGYSGSRSLPEIAQPFLVSARNRLNESISLAVLDGQSALFVARAEAERLVTTGIQLGTRIDLYCSATGRVLLSGWLDDRIAGYLDETEITARTRHSLVKKAALRDAVKQARANGYATTDQELEIGLRSIAVPVFDGRGNVVAAMSASASSARVTISQMVNTFVPALRASADGLGRIA	0	2390	3125	3	tph_r	1	3'H	plot	2511166	Bradyrhizobium ivorense	TRUE	NA	NA	2511166	Bradyrhizobium ivorense	374	Bradyrhizobium	41294	Bradyrhizobiaceae	356	Rhizobiales	28211	Alphaproteobacteria	1224	Proteobacteria	2	Bacteria	131567	cellular organisms
132	NZ_CAADFC020000008.1[206664..221710]	Bradyrhizobium ivorense	2511166	Rieske 2Fe-2S domain-containing protein_1	Rieske 2Fe-2S domain-containing protein	Rieske 2Fe-2S domain-containing protein	WP_139859126.1	132#WP_139859126.1#NZ_CAADFC020000008.1[206664..221710]	64	1	1257	MLDQVSGTPRESDRVWSNDGVTRVPFWIFQDKAIYAAEQQRIFQGPSWNFLCLAIEVKNTGDFVTTFVGDTPVIVSRDSDGELYAFENRCAHRGALIALESRGNTKAFTCVYHAWSYDRQGNLKEVAFKEGIKGKGGMPPSFCMEQHNPRKLRLAEAFGVVFGSFSNDVPPLEEHLGEEIYSRIGRVMSGRTPVVLGRYTQALPNNWKLYMENVKDSYHASILHLFFTTFELNRLSQTGGIIVDPSGGHHVSFSAIDPNAAKSSDYDAQDLRSDSEFKLADPSLLQSFKEFPDNTTLQILSVFPTFVLQQIQNAIAVRQIVPRGPDKTDLHWTLLGFAEDTPEQRMTRLKQANLVGPAGYISMEDGCVGGFVQRGILGAPDEQAIIEMGGSGTDSSESR…	0	3285	4542	4	tph_a2	1	3'H	plot	2511166	Bradyrhizobium ivorense	TRUE	NA	NA	2511166	Bradyrhizobium ivorense	374	Bradyrhizobium	41294	Bradyrhizobiaceae	356	Rhizobiales	28211	Alphaproteobacteria	1224	Proteobacteria	2	Bacteria	131567	cellular organisms
133	NZ_CAADFC020000008.1[206664..221710]	Bradyrhizobium ivorense	2511166	aromatic-ring-hydroxylating dioxygenase subunit beta_1	aromatic-ring-hydroxylating dioxygenase subunit beta	aromatic-ring-hydroxylating dioxygenase subunit beta	WP_139859128.1	133#WP_139859128.1#NZ_CAADFC020000008.1[206664..221710]	49	1	474	MHVSNTIGLINHVQNAYARCIDSGNLEAWPDFFEDDCVYKITTSDNFAQGLEAGVIFANSKGMLRDRVASLREANIYERHVYRHFLGQAWIVSESADEVRSETSFFVARIMRDGTTDVYATGRYIDRYGMHGGGPRLRERIVVCDSSRFDTLLALPL	0	4546	5020	5	tph_a3	1	3'H	plot	2511166	Bradyrhizobium ivorense	TRUE	NA	NA	2511166	Bradyrhizobium ivorense	374	Bradyrhizobium	41294	Bradyrhizobiaceae	356	Rhizobiales	28211	Alphaproteobacteria	1224	Proteobacteria	2	Bacteria	131567	cellular organisms
134	NZ_CAADFC020000008.1[206664..221710]	Bradyrhizobium ivorense	2511166	4-hydroxythreonine-4-phosphate dehydrogenase PdxA_1	4-hydroxythreonine-4-phosphate dehydrogenase PdxA	4-hydroxythreonine-4-phosphate dehydrogenase PdxA	WP_139859129.1	134#WP_139859129.1#NZ_CAADFC020000008.1[206664..221710]	48	1	1011	MNQDSKTIALTIGDPNGIGPEIAVRAAAELHASNDIRIVLVGDAHVVRHYVERVGAGARLQHFTAAPAADGAILLHGVDALAASEFHPGQIEAAAGRATVAYVEAAIGLVRDGTVDAIVGCPHNETAVNAAGIPFSGYPGLIARLTGKPEEKVFMMLVGGGLRILHATLHERIHHALARLTPELIEEAGLACASTLQRLGVAHPRIGVFGINPHAGENGLFGDDDDHITAPAVARLRQAGIAAEGPVGADIMLGRKDIDGFVAIYHDQGHIPIKLLAGRNASALSVGAGVLFSSVGHGSAFDIAGQCKADHSAVLRTLRLIGNLPADKSTTQAGIA	0	5016	6027	6	tph_b	1	3'H	plot	2511166	Bradyrhizobium ivorense	TRUE	NA	NA	2511166	Bradyrhizobium ivorense	374	Bradyrhizobium	41294	Bradyrhizobiaceae	356	Rhizobiales	28211	Alphaproteobacteria	1224	Proteobacteria	2	Bacteria	131567	cellular organisms
135	NZ_CAADFC020000008.1[206664..221710]	Bradyrhizobium ivorense	2511166	2Fe-2S iron-sulfur cluster binding domain-containing protein_1	2Fe-2S iron-sulfur cluster binding domain-containing protein	2Fe-2S iron-sulfur cluster binding domain-containing protein	WP_139859131.1	135#WP_139859131.1#NZ_CAADFC020000008.1[206664..221710]	38	1	1026	MSFNVTVAEHGVTFPCEPREFVLDAAERAGYAMPSSCRKGACNTCEAGLLGGEVDQRGRGRRTAEDRTALMCRARPRSDLVIKPKRFERIDIFRRKTIRATVYRLARPAADVSIVTLRFPIGLRAPFKAGQYLQVIMDDGERRNFSLANAPRDNDGAELHIRHVSGGRFSTQILPRLAVGDTLQIEAPFGDFFLRKSGRPAILLASGTGFSPIKSIVESAIHAGAEQPTHLYWGARTREDIYLADLPMKWAKRFAWFSFTPVLSEPSPSWTGRTGLVHEAVREDHGDLSAADVYACGNPLMVSAAQRDFTENHRLPDAQFFADAFVESGAPADLQPIVAQT	0	6023	7049	7	tph_a1	1	3'H	plot	2511166	Bradyrhizobium ivorense	TRUE	NA	NA	2511166	Bradyrhizobium ivorense	374	Bradyrhizobium	41294	Bradyrhizobiaceae	356	Rhizobiales	28211	Alphaproteobacteria	1224	Proteobacteria	2	Bacteria	131567	cellular organisms
136	NZ_CAADFC020000008.1[206664..221710]	Bradyrhizobium ivorense	2511166	tripartite tricarboxylate transporter substrate binding protein_1	tripartite tricarboxylate transporter substrate binding protein	tripartite tricarboxylate transporter substrate binding protein	WP_139859134.1	136#WP_139859134.1#NZ_CAADFC020000008.1[206664..221710]	47	1	978	MRFYTAARIALGLLAASTPLAAQANDAAGYPARQIRIVVPFPAGGTADTLPRILAEKLRQKWNQPVIIDNRSGAGGNIGAEAVAGSPPDGYTLLASPPGPIAINQSLYAKLGYDPSELKPVALIGIVPNVLDVRPGFPAKTVKELIDYAKANPGKVTFASQGNGSTSHLTTILFQKLTGTTMVHVPYRGTAPALQDIMGNTVDLFFDNLGSSLSLHQGGTLRILGVAGPTPAPSLPDVPTVRETVPDFTSVTWFALMAPKGTPDDVIAKLNATVTELLREDDVRGQFGKLGVQVDPMDVEATAKFIAAERVRWGEIISTAHVTVD	0	7045	8023	8	tph_c	1	3'H	plot	2511166	Bradyrhizobium ivorense	TRUE	NA	NA	2511166	Bradyrhizobium ivorense	374	Bradyrhizobium	41294	Bradyrhizobiaceae	356	Rhizobiales	28211	Alphaproteobacteria	1224	Proteobacteria	2	Bacteria	131567	cellular organisms
137	NZ_CAADFC020000008.1[206664..221710]	Bradyrhizobium ivorense	2511166	gamma-glutamylcyclotransferase_-1	gamma-glutamylcyclotransferase	gamma-glutamylcyclotransferase	WP_139859135.1	137#WP_139859135.1#NZ_CAADFC020000008.1[206664..221710]	NA	-1	399	MTSDLLFVYGTLMRGFDHPMAKLLAGNADFLAEAQCRGRLYLVKHYPGLVRSDDAADIVHGELFRLRARDAMLDEFDMYEACGEGFPPPTEYVREMLPVRLADGSISEAWTYLYNWPVTDLPRIASGRFLEH	0	8044	8443	9	NA	1	3'H	no_plot	2511166	Bradyrhizobium ivorense	TRUE	NA	NA	2511166	Bradyrhizobium ivorense	374	Bradyrhizobium	41294	Bradyrhizobiaceae	356	Rhizobiales	28211	Alphaproteobacteria	1224	Proteobacteria	2	Bacteria	131567	cellular organisms
138	NZ_CAADFC020000008.1[206664..221710]	Bradyrhizobium ivorense	2511166	transglutaminase family protein_-1	transglutaminase family protein	transglutaminase family protein	WP_139859306.1	138#WP_139859306.1#NZ_CAADFC020000008.1[206664..221710]	NA	-1	813	MQIGVGFEITYTAPQPTPMVIMLSIHPSRFADIVGTEQITTDPDVPVGFYRDSFGNVCGRLVAAAGGVTFRGNALVRDSGVPDAVNPAAQQVPIEQLPDEMLVYLMASRYCETDKLTDIAWSLFGNTPPGWARVQAITDFVHNHVSFGYQHAHHMKSAHDVYESGAGVCRDFAHLALTFCRCMGIPARYCTGYLGDIGVPPDPAPMDFSGWFEVYLSGQWHTFDARHNTPRIGRILMATGRDAADVALTTSFGRMTLAKFVVVTEEVAAA	0	8487	9300	10	NA	1	3'H	no_plot	2511166	Bradyrhizobium ivorense	TRUE	NA	NA	2511166	Bradyrhizobium ivorense	374	Bradyrhizobium	41294	Bradyrhizobiaceae	356	Rhizobiales	28211	Alphaproteobacteria	1224	Proteobacteria	2	Bacteria	131567	cellular organisms
139	NZ_CAADFC020000008.1[206664..221710]	Bradyrhizobium ivorense	2511166	transglutaminase family protein_-1	transglutaminase family protein	transglutaminase family protein	WP_139859137.1	139#WP_139859137.1#NZ_CAADFC020000008.1[206664..221710]	NA	-1	897	MPLLTIHHKTVYRYARPVAFGEHRLMLRPRDGHDLRVLDSALLIDPAPMSLRWIHDVFGNSVAIATFDERADTLSFVSTATVELNTAEAFALTPDDPAYFYPFLYDDEEYPDVQQFVTPQYGDPNGELSAWARRFLDAEAPTPTFKILSGITHAIREEFSYRKRHERGTQHPLDTLQTRSGTCRDYALFMIEALRRLGMAARFVSGYLAMPSDGAGYLGGGSTHAWVQAYLPSAGWIEFDPTNGIVGTRDLIRVAVARDPRQAIPLHGVYLGPADAFVGMDVDIDVVSASQSANREMA	0	9302	10199	11	NA	1	3'H	no_plot	2511166	Bradyrhizobium ivorense	TRUE	NA	NA	2511166	Bradyrhizobium ivorense	374	Bradyrhizobium	41294	Bradyrhizobiaceae	356	Rhizobiales	28211	Alphaproteobacteria	1224	Proteobacteria	2	Bacteria	131567	cellular organisms
140	NZ_CAADFC020000008.1[206664..221710]	Bradyrhizobium ivorense	2511166	N-formylglutamate amidohydrolase_1	N-formylglutamate amidohydrolase	N-formylglutamate amidohydrolase	WP_139859139.1	140#WP_139859139.1#NZ_CAADFC020000008.1[206664..221710]	NA	1	798	MNYAGGPSVLLASTDASPVLEHNSDGRSPFLFTCDHYGRQIPAPLGGLGLPEGELVRHIAWDIGIAGVATQLADHLGAHLVAQRYSRLVIDCNRPPHVASSIPLISEATTVPGNEGLSREAAELRRAQIFDPYHARIDEIIERRLRDGMPTVLVALHSFTPVYAGIARPWHIGTLYHRDTMLPPLLLKHLRSEGDLVVGDNEPYAVSDETDYTIPVHGEKRGLMNSGIEIRQDLISDQAGETAWADRLARILGEIETTLRKEAKI	0	10302	11100	12	NA	1	3'H	no_plot	2511166	Bradyrhizobium ivorense	TRUE	NA	NA	2511166	Bradyrhizobium ivorense	374	Bradyrhizobium	41294	Bradyrhizobiaceae	356	Rhizobiales	28211	Alphaproteobacteria	1224	Proteobacteria	2	Bacteria	131567	cellular organisms
141	NZ_CAADFC020000008.1[206664..221710]	Bradyrhizobium ivorense	2511166	ATP-grasp domain-containing protein_-1	ATP-grasp domain-containing protein	ATP-grasp domain-containing protein	WP_172628003.1	141#WP_172628003.1#NZ_CAADFC020000008.1[206664..221710]	NA	-1	1035	MRRLRILVLMHPDFVPPDSSDGYSAQEINAWKTEYDVVSTLRAAGHEVRPLGVQEEIKPVRDEIENFKPHVVFTLLEEFHYEVVYDQHIASFLELMRIPYTGCNPRGLILARGKDLSKALVHHRRIAVPAFAVFPMRRKVKRPARLALPLIVKSLNMDGSFGISQASIVDTDEKLAERVAFIHERIGSAAIAEQYIEGRELYVGVIGNNRLRALPVWELEFGSMGGQRARRIATEKAKHDTSYQERVGIVDGPAKDLAPELATRIQHTAKRIYRALGLDGYARIDFRLSADGIPYFIEANPNPEIAKSQEFATAARHDGFDYPDLLRRIVALGISRAKAGVSLG	0	11237	12272	13	NA	1	3'H	no_plot	2511166	Bradyrhizobium ivorense	TRUE	NA	NA	2511166	Bradyrhizobium ivorense	374	Bradyrhizobium	41294	Bradyrhizobiaceae	356	Rhizobiales	28211	Alphaproteobacteria	1224	Proteobacteria	2	Bacteria	131567	cellular organisms
142	NZ_CAADFC020000008.1[206664..221710]	Bradyrhizobium ivorense	2511166	putative zinc-binding metallopeptidase_-1	putative zinc-binding metallopeptidase	putative zinc-binding metallopeptidase	WP_139859143.1	142#WP_139859143.1#NZ_CAADFC020000008.1[206664..221710]	NA	-1	1029	MPRRKFAWEKLSDEQLLGQRLSSLRVAVEGTWLQDCLGTLHEELEERGIRLRPHAWISSEWFSPANVPGIAIPFYLAHPRLMKLEKKMMLDVEGGTWSQCMAILRHEAGHALQHGYQLQRRRRWQQLFGPSSKHYPRYYRPNPASRNYVQHLRLWYAQSHPDEDFAETFAVWLRPRSNWRTRYAGWPALKKLEYVDELMGEIAGKRPLVVNRERVDPLHTLSQTLAEHYRKKQAFYAFSPPKTYDRDLSRLFSADIKHVRSPPAAVFIRRHRARIRQLVAQWTGENQLTLDAVLDDMISRCRELNLRAVGPEHRLVTNFTILLTAKTMHALFGPSRRKWIAL	0	12268	13297	14	NA	1	3'H	no_plot	2511166	Bradyrhizobium ivorense	TRUE	NA	NA	2511166	Bradyrhizobium ivorense	374	Bradyrhizobium	41294	Bradyrhizobiaceae	356	Rhizobiales	28211	Alphaproteobacteria	1224	Proteobacteria	2	Bacteria	131567	cellular organisms
143	NZ_CAADFC020000008.1[206664..221710]	Bradyrhizobium ivorense	2511166	helix-turn-helix transcriptional regulator_1	helix-turn-helix transcriptional regulator	helix-turn-helix transcriptional regulator	WP_139859144.1	143#WP_139859144.1#NZ_CAADFC020000008.1[206664..221710]	NA	1	951	MSKPLARAISQNQAGASPVQQDDLPTGERPHADAEMARVLKTAPLHMASDPTSGMITFWRHDPLHDVVRPMADHVIMTFPAEPVRFERRDGRAFVNGMTRPGTVTVIPAGSTSRWDIFQPLSVLQLYLPQTTLDRVALEAGTAAAGDLVERTAHPDPITSRLLLSAADALEGCAALDTLFRHQLTDLLATRLLSAHAGSPAAFRPVMGGLSPRVLSRTIERLRSDSDTDVSLAALAADAGLSRFHFCRAFKESTGLSPHAWLRQHRLEQAMSMLRDTDVSVVSVAAALGYSSQTAFAAAFRKLTGETPSDWRRRVR	0	13789	14740	15	NA	1	3'H	no_plot	2511166	Bradyrhizobium ivorense	TRUE	NA	NA	2511166	Bradyrhizobium ivorense	374	Bradyrhizobium	41294	Bradyrhizobiaceae	356	Rhizobiales	28211	Alphaproteobacteria	1224	Proteobacteria	2	Bacteria	131567	cellular organisms
144	NZ_CAADFC020000008.1[206664..221710]	Bradyrhizobium ivorense	2511166	SDR family NAD(P)-dependent oxidoreductase_1	SDR family NAD(P)-dependent oxidoreductase	SDR family NAD(P)-dependent oxidoreductase	WP_139859146.1	144#WP_139859146.1#NZ_CAADFC020000008.1[206664..221710]	NA	1	274	MKTFLSIGAGPGMGFATAERFAREGFQVVLAARRLPRAQELADRLMSKGYKAEARNVDASDAKSVAELVAEVETRHGSVDVLHYNAASLRKATLAEQPRDSFNFDLAVNIGGALAAAQAVASKMEAQRSGTILLTGGGFALAPSPDFLSISIGKAGIRALAHGLFEQYRAKGIHVATVTVCTLVAPESKEASAVADQFWHLHSQPKDSWTVETNYGL	1	14773	15047	16	NA	1	3'H	no_plot	2511166	Bradyrhizobium ivorense	TRUE	NA	NA	2511166	Bradyrhizobium ivorense	374	Bradyrhizobium	41294	Bradyrhizobiaceae	356	Rhizobiales	28211	Alphaproteobacteria	1224	Proteobacteria	2	Bacteria	131567	cellular organisms
145	NZ_CADIJQ010000001.1[1913474..1928386]	Achromobacter kerstersii	1353890	LysR family transcriptional regulator_-1	LysR family transcriptional regulator	LysR family transcriptional regulator	WP_175169377.1	145#WP_175169377.1#NZ_CADIJQ010000001.1[1913474..1928386]	NA	-1	305	MLTHRHIEVFRAVMIAGSVTRAAELLSTSQPTVSRELARMEQGIGFALFERVHGRLRPTMPALALYDEIRQSYAGLERVASAAARLREFRGGQLSVIALPAFSHSILPDAFRRFHGQHPGVSLSVETQESPFLEEWLTAQRYDLGLTEHDAAPAGTRVQLLLQVDEVCVLPDGHPLLEKAEIDLADFEGHAFVSLSSSDPYRIQIDEAFAEAGVLRRSIVETPTAVSVCTFVRQGLGVAIVNPLTALDFVGRGLHIRPLRRAFPFRVNVVFPEHRPANPLVETFMASLIEAAHAIKARLGA	1	0	305	1	NA	NA	NA	no_plot	1353890	Achromobacter kerstersii	TRUE	NA	NA	1353890	Achromobacter kerstersii	222	Achromobacter	506	Alcaligenaceae	80840	Burkholderiales	28216	Betaproteobacteria	1224	Proteobacteria	2	Bacteria	131567	cellular organisms
146	NZ_CADIJQ010000001.1[1913474..1928386]	Achromobacter kerstersii	1353890	diaminopimelate decarboxylase_1	diaminopimelate decarboxylase	diaminopimelate decarboxylase	WP_175169378.1	146#WP_175169378.1#NZ_CADIJQ010000001.1[1913474..1928386]	NA	1	1233	MAFDPRQLTQLATEHGTPLWVYDAAVIRERIAQLRRFDTIRFAQKACSNLHILRLMREEGAVVDAVSLGEIERSLAAGFDPKGEPEGMVFTADLIDHATLATVLKHGITVNAGSLDMLDRVGQASRGHRVWLRINPGFGHGHSNKTNTGGPQSKHGIWIDDVAEAVSIVRRHGLKLVGVHMHIGSGVDYGHLSSVCDAMVDVVRSLDHDIEAISAGGGLSIPYRDGEPRIDCDHYFEQWDAARKRIEQFLGHDIRLEIEPGRFLVAEAGVLVSEVHAINRRPERDFALVDAGFNDLMRPAMYGSFHRISVHAPDGSAPQGVAETRIAVAGPLCESGDVFTQEEGGVMSDQLLPQPRIGDYMVFHNAGAYGSSMSSNYNSRPLAPEVLLDEGRARLIRRR…	0	418	1651	2	NA	NA	NA	no_plot	1353890	Achromobacter kerstersii	TRUE	NA	NA	1353890	Achromobacter kerstersii	222	Achromobacter	506	Alcaligenaceae	80840	Burkholderiales	28216	Betaproteobacteria	1224	Proteobacteria	2	Bacteria	131567	cellular organisms
147	NZ_CADIJQ010000001.1[1913474..1928386]	Achromobacter kerstersii	1353890	2-dehydro-3-deoxyglucarate aldolase_-1	2-dehydro-3-deoxyglucarate aldolase	2-dehydro-3-deoxyglucarate aldolase	WP_054424946.1	147#WP_054424946.1#NZ_CADIJQ010000001.1[1913474..1928386]	NA	-1	768	MNSPLPNRFRQRILARERLIGFWMCMSSHITAELVGLADFDWLLLDGEHSPNEVPMFLQQLQALQGSASAAVGRPSWNDPVQIKRLLDIGFYNLLIPFIESEADARLAVAATRYPPQGIRGVAGAQRSNRYGTVPDYLQTINDNICVLLQIESRPGIDAVDEIASVEGVDGVFIGPSDLAAALGHIGNPGHPEVQEAIRHLHARVSAQGKAVGILAPVHADARRYLDMGMHFVAVGTDLGVFKQATFALRDAFPT	0	1799	2567	3	NA	NA	NA	no_plot	1353890	Achromobacter kerstersii	TRUE	NA	NA	1353890	Achromobacter kerstersii	222	Achromobacter	506	Alcaligenaceae	80840	Burkholderiales	28216	Betaproteobacteria	1224	Proteobacteria	2	Bacteria	131567	cellular organisms
148	NZ_CADIJQ010000001.1[1913474..1928386]	Achromobacter kerstersii	1353890	tripartite tricarboxylate transporter substrate binding protein_-1	tripartite tricarboxylate transporter substrate binding protein	tripartite tricarboxylate transporter substrate binding protein	WP_175169379.1	148#WP_175169379.1#NZ_CADIJQ010000001.1[1913474..1928386]	NA	-1	1014	MQQHKPLARRRFAILTAALAATTIGVLAMAPNAARAQAATWPAKPVKLIVPFPAGGSTDSVGRLLAAELSKELGQSVIVENKGGANGNIGSDVVAKAEPDGYTLLLSGVGSNAISYAVYQNMPYRNSDFAHISLLATGPNVLVANMEFPGKTIEDFIKLSRENPGKYTFASSGSGSSGHLAMEMLKQDAKIDLVHVPYKGGAAAITDMIGGRVSVMFLNQDTLLPQVTSGKLRALAVASAKRNPAYPDTPTVAESGYPGFSAESWFGLSAPAKTPPAVIQRLNQATVKALASPDIRKKLESVGFVVVADDPKSFSAFVDNEITKWGKAAKASGARMD	0	2664	3678	4	NA	NA	NA	no_plot	1353890	Achromobacter kerstersii	TRUE	NA	NA	1353890	Achromobacter kerstersii	222	Achromobacter	506	Alcaligenaceae	80840	Burkholderiales	28216	Betaproteobacteria	1224	Proteobacteria	2	Bacteria	131567	cellular organisms
149	NZ_CADIJQ010000001.1[1913474..1928386]	Achromobacter kerstersii	1353890	Ldh family oxidoreductase_-1	Ldh family oxidoreductase	Ldh family oxidoreductase	WP_175169380.1	149#WP_175169380.1#NZ_CADIJQ010000001.1[1913474..1928386]	NA	-1	1113	MQGNVATGTDVQVEQVREQILQVLQAWGMDEDLAHTTAGLMAQTDLLGIDSHGISMLPSYEEKWRAGSLRLDARAKIVRDSGASALIDGMGGLGYPVAAQAMHLAVDKALEHGVGAVSVCNSHHFGAAGVYARIAVERGVVGLVTSSANGVIMVPTRGAMPMLGTNPIAFGAPAAHNEPFVLDMATTTVAANKVKVYDFLGKPLPPGWAVDGQGGAVTDADAAMQFIFKRPEGGLTPLGGTPAMSSHKGYGLAMMAQILGGTLSGSAFAARRAPTRQPGEPDDVGHFFLALNPDAFRAAGSFESDMDDLIDSMHDTPPANPDEPVLVAGEPEAAERARRLRAGIPISAALAERLRGICERAGTPYLLDDK	0	3772	4885	5	NA	NA	NA	no_plot	1353890	Achromobacter kerstersii	TRUE	NA	NA	1353890	Achromobacter kerstersii	222	Achromobacter	506	Alcaligenaceae	80840	Burkholderiales	28216	Betaproteobacteria	1224	Proteobacteria	2	Bacteria	131567	cellular organisms
150	NZ_CADIJQ010000001.1[1913474..1928386]	Achromobacter kerstersii	1353890	FCD domain-containing protein_-1	FCD domain-containing protein	FCD domain-containing protein	WP_175169381.1	150#WP_175169381.1#NZ_CADIJQ010000001.1[1913474..1928386]	NA	-1	774	MARSKASSSSEPQTPVESDASASQPLERGHRVRLADQVYGQIFEQIVSGGLNVGDKLPSENEISERFGVSRPVVREALLRLRADGLITAHQGLGTFVSHQPAPRLKTFNDVQNVSAYLRAQEVRVALEGDAARLAALRRTDEQLKKIADAHAAFADSLTHGQVSPEADLAFHASIAEASGNDFYLGVLESIHESINGFMRLTLSLTRTGSRQRAQRVVDEHATILDAIREQDSERARVAMQFHLGQARHRLVDRERD	0	4950	5724	6	NA	NA	NA	no_plot	1353890	Achromobacter kerstersii	TRUE	NA	NA	1353890	Achromobacter kerstersii	222	Achromobacter	506	Alcaligenaceae	80840	Burkholderiales	28216	Betaproteobacteria	1224	Proteobacteria	2	Bacteria	131567	cellular organisms
151	NZ_CADIJQ010000001.1[1913474..1928386]	Achromobacter kerstersii	1353890	dihydrodipicolinate synthase family protein_-1	dihydrodipicolinate synthase family protein	dihydrodipicolinate synthase family protein	WP_175169382.1	151#WP_175169382.1#NZ_CADIJQ010000001.1[1913474..1928386]	NA	-1	930	MKTTPVTAQDLQRSVIAVPPLARHDDLSLNEAANKALLGHLEAGGVRNVMYGGNANFYNVGVSEYARIVDMLAGLAGSDTWILPSVGPDYGKMMDQAAILRSRAFPTAMLLPMAFPYTDDGLAEGVRRFTDALGKPAVVYIKSADYLAPETAARLIEEGRIAAFKYAVVRDNPAKDAYLSSLLESVDSRWIVSGIGERPAIVHYRDFGLKSFTSGSVCVAPRGSMRLLHLLGEGRYDEAEAVREHYLGLEDCRDGISPIRVLHDAVTLSGVADMGPMLPLLTGISAAERERVAPVARALAAWDKEAVAA	0	5828	6758	7	NA	NA	NA	no_plot	1353890	Achromobacter kerstersii	TRUE	NA	NA	1353890	Achromobacter kerstersii	222	Achromobacter	506	Alcaligenaceae	80840	Burkholderiales	28216	Betaproteobacteria	1224	Proteobacteria	2	Bacteria	131567	cellular organisms
152	NZ_CADIJQ010000001.1[1913474..1928386]	Achromobacter kerstersii	1353890	tripartite tricarboxylate transporter substrate binding protein_1	tripartite tricarboxylate transporter substrate binding protein	tripartite tricarboxylate transporter substrate binding protein	WP_175169383.1	152#WP_175169383.1#NZ_CADIJQ010000001.1[1913474..1928386]	NA	1	1002	MQAPIVRCRLITAVCLMATALLLPAAQAHADYPERDVKIIVPFPAGGTADIAARVVAAELGKSWNKPVVVDNKAGAGGNVGTAEAARATADGYTLLMGTVSTHAINQSVYSKLPYDPVKDFVPVTLVIPVPNILELNPKFADKHGIRTVADLIKYLKANPGSVNMASTGNGTSTHLSGELFQSMTGTRMTHVPYKGSSPALTDVMGGSADLIFDNLPSSMGYIKGGKLRPLAVTTAARSPALPDVPTMAEAGVKGYEASSWFGLLAPAGTPPAIVEKIQRDVAAALQQEPVRAQLQAQGATPSGNTPTQFKQFMAQETVKWAEVVKTSGAKVD	0	6984	7986	8	tph_c	NA	NA	no_plot	1353890	Achromobacter kerstersii	TRUE	NA	NA	1353890	Achromobacter kerstersii	222	Achromobacter	506	Alcaligenaceae	80840	Burkholderiales	28216	Betaproteobacteria	1224	Proteobacteria	2	Bacteria	131567	cellular organisms
153	NZ_CADIJQ010000001.1[1913474..1928386]	Achromobacter kerstersii	1353890	tripartite tricarboxylate transporter substrate binding protein_1	tripartite tricarboxylate transporter substrate binding protein	tripartite tricarboxylate transporter substrate binding protein	WP_175169384.1	153#WP_175169384.1#NZ_CADIJQ010000001.1[1913474..1928386]	NA	1	972	MNKLICAAAAASAVLLGGPAAQAAGYPDKPVTMIVPFVPGGSSDITARSVTPALSKILGQTFVVENKPGANSAIGAQALARSTPDGYTMMVGSIGTFAINEALYKNLSYNPSKDFAYLTQAVRNPNVLVAAPTFPAATVAELVAYAKKNPGSVSYASSGTGSSDHLSAVLFRQRTDSTGVDVPYKGGGAAIADLIGGQVNVSFQNLGAVQNHIKAGKLKALAITGDARAPDLPDVPTLAEAGIKDMVVYSWQGFAVPKGTPPAVVEQLSKALQTALRDPKTEQTLQGLGFEVVANTPQQFTQFQQGEVKRWKDVIQKANIQLE	0	8109	9081	9	NA	NA	NA	no_plot	1353890	Achromobacter kerstersii	TRUE	NA	NA	1353890	Achromobacter kerstersii	222	Achromobacter	506	Alcaligenaceae	80840	Burkholderiales	28216	Betaproteobacteria	1224	Proteobacteria	2	Bacteria	131567	cellular organisms
154	NZ_CADIJQ010000001.1[1913474..1928386]	Achromobacter kerstersii	1353890	2-hydroxyacid dehydrogenase_1	2-hydroxyacid dehydrogenase	2-hydroxyacid dehydrogenase	WP_175169565.1	154#WP_175169565.1#NZ_CADIJQ010000001.1[1913474..1928386]	NA	1	957	MTTKQRIIQVGSLAGSPTANKSLADRYDVVELWKFPDRKAALAEHGKGITAVVTSANFGADAELINALPDLKAICSWGVGYETIDVEAAKKRGVQVSNTPDVLTDCVADLAWGLLIAGARRMGQGERFVRADQWGQVHGSIPLGQRVSGKKLGIVGLGRIGEAIAKRGTGFDMDVRYHNRRKRDDIAYGYEASLVDLAKWADFLMVATVGGPSTRHLVNQPVLEALGPTGIIVNIARGPVIDEAALVAALESGKLGCAALDVFEHEPKVPDALKKSDKAVVLPHIGSATLETRLGMENLMLDNLQAYFDTGRVITPVE	0	9196	10153	10	NA	NA	NA	no_plot	1353890	Achromobacter kerstersii	TRUE	NA	NA	1353890	Achromobacter kerstersii	222	Achromobacter	506	Alcaligenaceae	80840	Burkholderiales	28216	Betaproteobacteria	1224	Proteobacteria	2	Bacteria	131567	cellular organisms
155	NZ_CADIJQ010000001.1[1913474..1928386]	Achromobacter kerstersii	1353890	hypothetical protein_-1	hypothetical protein	hypothetical protein	WP_050730069.1	155#WP_050730069.1#NZ_CADIJQ010000001.1[1913474..1928386]	NA	-1	240	MTTHSRIAAFLSTSALCLGLAAAPSAFAAGADATTKAGDTKTHAQHKHHKSDKTSAKPAAAKSGTASKMDHSGATTPAK	0	10277	10517	11	NA	NA	NA	no_plot	1353890	Achromobacter kerstersii	TRUE	NA	NA	1353890	Achromobacter kerstersii	222	Achromobacter	506	Alcaligenaceae	80840	Burkholderiales	28216	Betaproteobacteria	1224	Proteobacteria	2	Bacteria	131567	cellular organisms
156	NZ_CADIJQ010000001.1[1913474..1928386]	Achromobacter kerstersii	1353890	sulfite exporter TauE/SafE family protein_-1	sulfite exporter TauE/SafE family protein	sulfite exporter TauE/SafE family protein	WP_054424932.1	156#WP_054424932.1#NZ_CADIJQ010000001.1[1913474..1928386]	NA	-1	810	MSLLVIAACLAAGGLIGFMGGVLGIGGGLIAIPALVLLMGMSQQLAQGTALIMVLPAITMAVRKYNQQTRIDKRVAAAGAAGAVLFTWVGARLALGIDSSVLRRSFAVFLFFIALFYVWQTWRAGRVAAGNQKHKEKAATQTQKPTRAAPAFTPRRASVLGMLCGTLGGFFGVGGAVLAVPIITSVFRLPQTTAQALALSMVIPGSTIALITYGWAGQANWMVGLPMAIGSLLFVPVGVRLAYKLPERKLRASFALMLFATVALLAFES	0	10690	11500	12	NA	NA	NA	no_plot	1353890	Achromobacter kerstersii	TRUE	NA	NA	1353890	Achromobacter kerstersii	222	Achromobacter	506	Alcaligenaceae	80840	Burkholderiales	28216	Betaproteobacteria	1224	Proteobacteria	2	Bacteria	131567	cellular organisms
157	NZ_CADIJQ010000001.1[1913474..1928386]	Achromobacter kerstersii	1353890	DNA repair protein RadA_-1	DNA repair protein RadA	DNA repair protein RadA	WP_054424929.1	157#WP_054424929.1#NZ_CADIJQ010000001.1[1913474..1928386]	NA	-1	1362	MAKSRTVYVCADCGGTTPKWQGKCPHCNAWNTLEETVESSSPAASAHRYAPLASASPVRSLSEIEARETPRQPTGLDEFDRVLGGGLVAGAVVLIGGDPGIGKSTLLLQALASLSETTPVLYVTGEESAEQVALRARRLDLQTGNVNLLAEIRLEAIQAAVSEQKPTVAVIDSIQTLYSGELSAAPGSVSQVRECAAQLTRLAKQTGIAIVMIGHVTKDGALAGPRVLEHIVDTVLYFEGDTHSSFRLVRAFKNRFGAVNELGVFAMTDRGLRGVANPSALFLSQHEQQVAGSCVMATQEGTRPLLVEIQALVDSSHAPNPRRLTVGLEGNRLAMLLAVLHRHAGVTTFDQDVFVNAVGGVRITEPAADLPVLLAIMSSLRDKPLPRGLIAFGEVGLAG…	0	11513	12875	13	NA	NA	NA	no_plot	1353890	Achromobacter kerstersii	TRUE	NA	NA	1353890	Achromobacter kerstersii	222	Achromobacter	506	Alcaligenaceae	80840	Burkholderiales	28216	Betaproteobacteria	1224	Proteobacteria	2	Bacteria	131567	cellular organisms
158	NZ_CADIJQ010000001.1[1913474..1928386]	Achromobacter kerstersii	1353890	hypothetical protein_1	hypothetical protein	hypothetical protein	WP_175169385.1	158#WP_175169385.1#NZ_CADIJQ010000001.1[1913474..1928386]	NA	1	651	MSITYRPPFDEDDERDLRALYRKPRPGSSPELDAAVRRAWHPGHSWHPGWAAAACAAMVAGLFAWTDMRESADAPELNAQLVAPHEVGTSAERSPPPVALTDALAGKSPAPAVTQRVSVSASASESTAEPIQSQAAQVAPAPEAAAAGTAQPAEATATDVVAFSEEDIEARVAHIRSLMQNDQQDDAVQALRELQQGAPDLTLPDDLQELAQQNPA	0	13217	13868	14	NA	NA	NA	no_plot	1353890	Achromobacter kerstersii	TRUE	NA	NA	1353890	Achromobacter kerstersii	222	Achromobacter	506	Alcaligenaceae	80840	Burkholderiales	28216	Betaproteobacteria	1224	Proteobacteria	2	Bacteria	131567	cellular organisms
159	NZ_CADIJQ010000001.1[1913474..1928386]	Achromobacter kerstersii	1353890	homoprotocatechuate degradation operon regulator HpaR_1	homoprotocatechuate degradation operon regulator HpaR	homoprotocatechuate degradation operon regulator HpaR	WP_175169386.1	159#WP_175169386.1#NZ_CADIJQ010000001.1[1913474..1928386]	NA	1	465	MSPSFHHRNLPHLLLYARETLMAHFRPVLHAAGVTEQQWRVLRTLSEVGSMEPNQIARSCQILSPSLTRMLAGMEEQGLIKRVRSSADQRRQEISLTPKSNKLIDRMRPHVDAKYQEIEAKIGKELLDRLYRDVDTMVDLIKQNTPASRDADEG	0	14056	14521	15	NA	NA	NA	no_plot	1353890	Achromobacter kerstersii	TRUE	NA	NA	1353890	Achromobacter kerstersii	222	Achromobacter	506	Alcaligenaceae	80840	Burkholderiales	28216	Betaproteobacteria	1224	Proteobacteria	2	Bacteria	131567	cellular organisms
160	NZ_CADIJQ010000001.1[1913474..1928386]	Achromobacter kerstersii	1353890	3,4-dihydroxyphenylacetate 2,3-dioxygenase_-1	3,4-dihydroxyphenylacetate 2,3-dioxygenase	3,4-dihydroxyphenylacetate 2,3-dioxygenase	WP_054424925.1	160#WP_054424925.1#NZ_CADIJQ010000001.1[1913474..1928386]	NA	-1	389	MGKLALAAKVTHVPSMYLSELPGKHHGCREAAIQGHREIGQRCRDLDVDTIVVLDVHWLVNAGYHVNANARFAGRYTSNELPHFIKDMDYAYGGNPELGRRIAECANAAGVGTRTHEIDSLELEYGTLVPMRYMNGDGRFNVVSVAAWCAWHGLDESRRFGAALRQAIEASDNRVAVLASGSLSHRFNDNNSPEAAMHQISREFHRQVDLRVVDLWRQGDWKTFCAMLPEYAELCVGEGGMHDTAMLLGLLGWDAYDKPVEIVTDYFTSSGTGQINAIFPVPD	1	14524	14913	16	NA	NA	NA	no_plot	1353890	Achromobacter kerstersii	TRUE	NA	NA	1353890	Achromobacter kerstersii	222	Achromobacter	506	Alcaligenaceae	80840	Burkholderiales	28216	Betaproteobacteria	1224	Proteobacteria	2	Bacteria	131567	cellular organisms
161	NZ_CADIKO010000002.1[1581000..1596063]	Achromobacter aegrifaciens	1287736	diaminopimelate decarboxylase_1	diaminopimelate decarboxylase	diaminopimelate decarboxylase	WP_054452398.1	161#WP_054452398.1#NZ_CADIKO010000002.1[1581000..1596063]	NA	1	111	MAFDPRQLTQLAAEHGTPLWVYDAAVIRERIAQLRRFDTIRYAQKACSNLHILRLMRAEGAVVDAVSLGEIERSLAAGFQPQGEPEGIVFTADLIDHATLAAVLKHGITVNAGSLDMLARVGQASPGHRVWLRINPGFGHGHSNKTNTGGPQSKHGIWIGDVAEAMAIVRRHGLKLVGIHMHIGSGVDYAHLSSVCDAMVDVVASLDHDIEAISAGGGLSIPYREGDARIDCDHYFEQWDAARRRIAERLGHEIRLEIEPGRFLVAEAGALVSEVHSINRRPERDFALVDAGFNDLMRPAMYGSYHRISVHAPDGGKPQGAAETRIAVAGPLCESGDVFTQDAGGVVSDQLLPQPRIGDFLVFHDAGAYGSSMSSNYNSRPLAPEVLLDNGAARLIRRR…	1	0	111	1	NA	NA	NA	no_plot	1287736	Achromobacter aegrifaciens	TRUE	NA	NA	1287736	Achromobacter aegrifaciens	222	Achromobacter	506	Alcaligenaceae	80840	Burkholderiales	28216	Betaproteobacteria	1224	Proteobacteria	2	Bacteria	131567	cellular organisms
162	NZ_CADIKO010000002.1[1581000..1596063]	Achromobacter aegrifaciens	1287736	2-dehydro-3-deoxyglucarate aldolase_-1	2-dehydro-3-deoxyglucarate aldolase	2-dehydro-3-deoxyglucarate aldolase	WP_054452400.1	162#WP_054452400.1#NZ_CADIKO010000002.1[1581000..1596063]	NA	-1	768	MNSPLPNRFRQRILARERLIGFWMCMSSHITAELVGLADFDWLLLDGEHSPNEVPMFLQQLQALQGSASAAVGRPSWNDPVEIKRLLDIGFYNLLIPFIESEEDARRAVAATRYPPQGMRGVAGAQRSNRYGTVPDYLHTINDNICVLLQIESRPGIAAVDEIASVEGVDGVFIGPSDLAAALGHIGNPGHPEVQEAIRHLYQRVSAQGKAVGILAPVHADARRYLDMGMHFVAVGTDLGVFKQATFALREAFPT	0	117	885	2	NA	NA	NA	no_plot	1287736	Achromobacter aegrifaciens	TRUE	NA	NA	1287736	Achromobacter aegrifaciens	222	Achromobacter	506	Alcaligenaceae	80840	Burkholderiales	28216	Betaproteobacteria	1224	Proteobacteria	2	Bacteria	131567	cellular organisms
163	NZ_CADIKO010000002.1[1581000..1596063]	Achromobacter aegrifaciens	1287736	tripartite tricarboxylate transporter substrate binding protein_-1	tripartite tricarboxylate transporter substrate binding protein	tripartite tricarboxylate transporter substrate binding protein	WP_175181439.1	163#WP_175181439.1#NZ_CADIKO010000002.1[1581000..1596063]	NA	-1	996	MQQKKPAARARLAILAAAGTLAMLPGMLMAQGAAWPAKQLKLVVPFPAGGSTDSVGRLLAAELSKELGQTVVVENKGGANGNIGSDMVAKAEPDGYTLLLSGVGSNAISYAIYQNMPYRNSDFAHISLLATGPNVLVANNDFPGKTFADFIKLARENPGKYTHASSGSGSSGHLAMEMLKQDAKIDLVHVPYKGGAAAITDTIGGRVSVLFLNQDALLPQVTSGKLRALAVASAKRNPAYPDTPTVAESGYPGFSAESWFGLSAPAKTPPAVIQRLNQATVKALSSPEIRQKLESVGFVVVADDPKSFSAFVDNEITKWGKAAKASGAKMD	0	959	1955	3	NA	NA	NA	no_plot	1287736	Achromobacter aegrifaciens	TRUE	NA	NA	1287736	Achromobacter aegrifaciens	222	Achromobacter	506	Alcaligenaceae	80840	Burkholderiales	28216	Betaproteobacteria	1224	Proteobacteria	2	Bacteria	131567	cellular organisms
164	NZ_CADIKO010000002.1[1581000..1596063]	Achromobacter aegrifaciens	1287736	dihydroxy-acid dehydratase_-1	dihydroxy-acid dehydratase	dihydroxy-acid dehydratase	WP_175213715.1	164#WP_175213715.1#NZ_CADIKO010000002.1[1581000..1596063]	NA	-1	1746	MSHSTKRKKPEELRSHRWYGVRDLRSFGHRSRTAQMGYHRSDYAGKPVIAIINTWSDINPCHSHFKQRVEEVKRGIWQAGGFPVEMPAMSLSEPFQKPTTMLYRNLLAMETEELLRSYPADGCVLMGGCDKTTPALLMGAVSMDLPTIFMPAGPMLRGNWNGNTLGSGSDTWKYWAELRAGNITEEDWQGVEDGIARSPGHCMTMGTASTMTGAVEALGLCLSGASSIPAPDSRHAQMASLTGKRIVEMVWEDLKPSDLLTAASFDNAVRTVLALSGSTNSVVHLIAMARRSGFGLDLDRFDHLARTTPVLANLRPAGKYLMEDFYYAGGLRAMLVQLGDLLDTTQRTVDGRTLGENIAGARIFNEDVIRPRAQALIERDGLAVLRGNLAPDGAVIKPP…	0	2002	3748	4	NA	NA	NA	no_plot	1287736	Achromobacter aegrifaciens	TRUE	NA	NA	1287736	Achromobacter aegrifaciens	222	Achromobacter	506	Alcaligenaceae	80840	Burkholderiales	28216	Betaproteobacteria	1224	Proteobacteria	2	Bacteria	131567	cellular organisms
165	NZ_CADIKO010000002.1[1581000..1596063]	Achromobacter aegrifaciens	1287736	Ldh family oxidoreductase_-1	Ldh family oxidoreductase	Ldh family oxidoreductase	WP_054452404.1	165#WP_054452404.1#NZ_CADIKO010000002.1[1581000..1596063]	NA	-1	1107	MQGNIAAEVPVEQVREQILQVLMAWGMAQDLAHITAGLMARTDLLGIDSHGISMLPAYEDKLRAGALRLDARPRILRDGGASALIDGMGGLGYPVAAQAMNLAVDKALEHGVGAVSVCNSHHFGAAGVYARIAVERGVVGLVTSSANGVIMVPTRGAMPMLGTNPIAFGAPAAYNEPFVLDMATTTVAANKVKVYDFLDQPLPPGWAVDGQGGAVTDAAAAMQFIFTHPEGGLTPLGGTAAMSSHKGYGLAMMAQILGGTLSGSAFAARRAPTRRPGEPDDVGHFFLALNPDAFRAAGSFESDMDDMIDAMHDTPPANPDEPVLVAGEPEAAERARRLRAGIPISAALAERLRAICERAGTPYLLDPA	0	3795	4902	5	NA	NA	NA	no_plot	1287736	Achromobacter aegrifaciens	TRUE	NA	NA	1287736	Achromobacter aegrifaciens	222	Achromobacter	506	Alcaligenaceae	80840	Burkholderiales	28216	Betaproteobacteria	1224	Proteobacteria	2	Bacteria	131567	cellular organisms
166	NZ_CADIKO010000002.1[1581000..1596063]	Achromobacter aegrifaciens	1287736	FadR family transcriptional regulator_-1	FadR family transcriptional regulator	FadR family transcriptional regulator	WP_118932816.1	166#WP_118932816.1#NZ_CADIKO010000002.1[1581000..1596063]	NA	-1	774	MARPKATPAPAPQAPAEHDAAGALVLERGHRVRLADQLYGQIFEQIVSGGLNVGDKLPSENEISERFGVSRPVVREALLRLRADGLITAHQGLGTFVSHAPAPRLKTFNDVQNVSAYLRAQEVRVALEGDAARLAALRRTDEQLRKIADAHAAFADSLARGQVSAEADLAFHASIAEASGNDFYLGVLESIHESISGFMRLTLNLTRTGSRQRAQRVVDEHAAILDAIREQDSERARVAMQFHLGQARHRLVDRERD	0	4951	5725	6	NA	NA	NA	no_plot	1287736	Achromobacter aegrifaciens	TRUE	NA	NA	1287736	Achromobacter aegrifaciens	222	Achromobacter	506	Alcaligenaceae	80840	Burkholderiales	28216	Betaproteobacteria	1224	Proteobacteria	2	Bacteria	131567	cellular organisms
167	NZ_CADIKO010000002.1[1581000..1596063]	Achromobacter aegrifaciens	1287736	dihydrodipicolinate synthase family protein_-1	dihydrodipicolinate synthase family protein	dihydrodipicolinate synthase family protein	WP_059379899.1	167#WP_059379899.1#NZ_CADIKO010000002.1[1581000..1596063]	NA	-1	930	MKTSPVTAQDLQRSVIAVPPLARHDDLSLNEAANKALLGHLEAGGVRNVMYGGNANFYNVGVGEYARIVDMLAGLAGADTWILPSVGPDYGKMMDQAAILRTRAFPTAMLLPMSFPYTDAGLAEGVRRFTDALGKPAVIYIKSSGYLAPESAARLIEEGRIVAFKYAVVRDDPSQDAYLSSLLQAVDARWIVSGIGERPAIVHYRDFGLKSFTSGSVCVAPRGSMRLLHLLRDGRYDEAEAVRQQYLGLEDCRDSISPIRVLHDAVTLSGVADMGPMLPLLTGISAAERERVAPVARALAAWDREAAAA	0	5805	6735	7	NA	NA	NA	no_plot	1287736	Achromobacter aegrifaciens	TRUE	NA	NA	1287736	Achromobacter aegrifaciens	222	Achromobacter	506	Alcaligenaceae	80840	Burkholderiales	28216	Betaproteobacteria	1224	Proteobacteria	2	Bacteria	131567	cellular organisms
168	NZ_CADIKO010000002.1[1581000..1596063]	Achromobacter aegrifaciens	1287736	tripartite tricarboxylate transporter substrate binding protein_1	tripartite tricarboxylate transporter substrate binding protein	tripartite tricarboxylate transporter substrate binding protein	WP_175213716.1	168#WP_175213716.1#NZ_CADIKO010000002.1[1581000..1596063]	NA	1	1014	MHAAPARGRSALAVLCSAALTAAAFLSPAAPARADYPERDVKIIVPFPAGGTTDIAARIVAAELGKTWNKAVVVDNKAGAGGNVGTAEAARAAPDGYTLLMGTVSTHAINQSVYAKLPYDPVKDFVPVTLVIPVPNILELNPAFADKHGIRTVADLIKYLKANPGSVNMASTGNGTSTHLSGELFQNMTGTRMTHVPYKGSSPALTDVMAGSADLIFDNLPSSMGFLKSGKLRPLAVTSAQRSPALPDVPTMAEAGVQGYDASSWFGLLAPAGTPQAVVDKIQRDVAAALKQESVRTQLQAQGATPSGNTPAQFKQFMAQESAKWAEVVKKSGAKVD	0	6959	7973	8	tph_c	NA	NA	no_plot	1287736	Achromobacter aegrifaciens	TRUE	NA	NA	1287736	Achromobacter aegrifaciens	222	Achromobacter	506	Alcaligenaceae	80840	Burkholderiales	28216	Betaproteobacteria	1224	Proteobacteria	2	Bacteria	131567	cellular organisms
169	NZ_CADIKO010000002.1[1581000..1596063]	Achromobacter aegrifaciens	1287736	tripartite tricarboxylate transporter substrate binding protein_1	tripartite tricarboxylate transporter substrate binding protein	tripartite tricarboxylate transporter substrate binding protein	WP_054452407.1	169#WP_054452407.1#NZ_CADIKO010000002.1[1581000..1596063]	NA	1	987	MNKLMSAAAVAAAVAAGAVLPGMPAAQAAGYPDKPVTMIVPFVPGGSSDITARSVTPGLTKILGQTFVVENKPGANSAIGAQALARSTPDGYTMMVGSIGTFAINEALYKNLSYNPSKDFEYLTQAVRNPNVLVAAPTFPASTVAELVEYAKKNPGKVSYASSGTGSSDHLSAVLFRQRTQSTGVDVPYRGGGAAIADLIGGQVNVSFQNLGAVQTHIKAGKLKALAITGDARAADLPDVPTLAEAGIKDMVVYSWQGFAVPKGTPAPIVQQLSKALQTALRDPQTEKTLQGLGFEVVANTPQQFTAFQQAEVKRWKDVIQKANIQLE	0	8047	9034	9	NA	NA	NA	no_plot	1287736	Achromobacter aegrifaciens	TRUE	NA	NA	1287736	Achromobacter aegrifaciens	222	Achromobacter	506	Alcaligenaceae	80840	Burkholderiales	28216	Betaproteobacteria	1224	Proteobacteria	2	Bacteria	131567	cellular organisms
170	NZ_CADIKO010000002.1[1581000..1596063]	Achromobacter aegrifaciens	1287736	2-hydroxyacid dehydrogenase_1	2-hydroxyacid dehydrogenase	2-hydroxyacid dehydrogenase	WP_175213717.1	170#WP_175213717.1#NZ_CADIKO010000002.1[1581000..1596063]	NA	1	957	MTTKHRIIQVGSLAGSPYANKTLADRYDVVELWKYPDRKAALAEHGKGVTAVVTSATYGANAELINALPDLKAICSWGVGYETIDVQAARQRGVQVSNTPDVLTDCVADLAWGLLIAGARHMGQGERFVRAGQWGQVHGGIPLGQRVSGKKLGIVGLGRIGEAIARRGMGFDMDVRYHNRRKRDDVEYGYEASLTDLAKWADFLIVATVGGPSTRHLVNREVLEALGPTGIIVNIARGPVIDETALVAALEAGKLGCAALDVFEHEPKVPEALLKTDRAVLLPHIGSATLETRVAMENLMLENLQAFFETGRVITPAE	0	9137	10094	10	NA	NA	NA	no_plot	1287736	Achromobacter aegrifaciens	TRUE	NA	NA	1287736	Achromobacter aegrifaciens	222	Achromobacter	506	Alcaligenaceae	80840	Burkholderiales	28216	Betaproteobacteria	1224	Proteobacteria	2	Bacteria	131567	cellular organisms
171	NZ_CADIKO010000002.1[1581000..1596063]	Achromobacter aegrifaciens	1287736	hypothetical protein_-1	hypothetical protein	hypothetical protein	WP_054452411.1	171#WP_054452411.1#NZ_CADIKO010000002.1[1581000..1596063]	NA	-1	240	MTTHSRIAAFLSTSALCLGLAAAPSAFAAGADATSKTGETKTQAQHKHHKSDKTSAKPAAAKSGGAAKTDHSGAAAPAK	0	10237	10477	11	NA	NA	NA	no_plot	1287736	Achromobacter aegrifaciens	TRUE	NA	NA	1287736	Achromobacter aegrifaciens	222	Achromobacter	506	Alcaligenaceae	80840	Burkholderiales	28216	Betaproteobacteria	1224	Proteobacteria	2	Bacteria	131567	cellular organisms
172	NZ_CADIKO010000002.1[1581000..1596063]	Achromobacter aegrifaciens	1287736	sulfite exporter TauE/SafE family protein_-1	sulfite exporter TauE/SafE family protein	sulfite exporter TauE/SafE family protein	WP_054453641.1	172#WP_054453641.1#NZ_CADIKO010000002.1[1581000..1596063]	NA	-1	780	MSLLVIAACLAAGGLIGFMGGVLGIGGGLIAIPALVLLMGMSQQLAQGTALIMVLPTIMMAVRKYNQQTRIDKRVALAGAAGAVVFTWVGAQLALGIDSGILRRSFAVFLFFIALFYVWQTWRASRPVAARKPAAKGDAPVFTPRRASVLGILCGTLGGFFGVGGAVLAVPIITSVFRLPQTTAQALALSMVIPGSFIALITYSWAGQADWLVGAPLAIGSLLFVPVGVKLAYRLPERKLRACFALMLFATVALLAFES	0	10639	11419	12	NA	NA	NA	no_plot	1287736	Achromobacter aegrifaciens	TRUE	NA	NA	1287736	Achromobacter aegrifaciens	222	Achromobacter	506	Alcaligenaceae	80840	Burkholderiales	28216	Betaproteobacteria	1224	Proteobacteria	2	Bacteria	131567	cellular organisms
173	NZ_CADIKO010000002.1[1581000..1596063]	Achromobacter aegrifaciens	1287736	DNA repair protein RadA_-1	DNA repair protein RadA	DNA repair protein RadA	WP_059379903.1	173#WP_059379903.1#NZ_CADIKO010000002.1[1581000..1596063]	NA	-1	1362	MAKSRTVYVCSDCGGTTPKWQGKCPHCNAWNTLEETVESSAPAAASHRYAPLAAASPVRSLSEIEARETPRQPTGLEEFDRVLGGGLVAGAVVLIGGDPGIGKSTLLLQALASLSEVTNVLYVTGEESAEQVALRARRLGLQTGNVNLLAEIRLESIQAAVSEQKPTVAVIDSIQTLYSGELTAAPGSVSQVRECAAQLTRLAKQTGIAIVMIGHVTKDGALAGPRVLEHIVDTVLYFEGDTHSSFRLVRAFKNRFGAVNELGVFAMTDRGLRGVANPSALFLSQHEQQVAGSCVMATQEGTRPLLVEIQALVDSSHAPNPRRLTVGLEGNRLAMLLAVLHRHAGVSTFDQDVFVNAVGGVRITEPAADLPVLLAIMSSLRDKPLPRGLIAFGEVGLAG…	0	11502	12864	13	NA	NA	NA	no_plot	1287736	Achromobacter aegrifaciens	TRUE	NA	NA	1287736	Achromobacter aegrifaciens	222	Achromobacter	506	Alcaligenaceae	80840	Burkholderiales	28216	Betaproteobacteria	1224	Proteobacteria	2	Bacteria	131567	cellular organisms
174	NZ_CADIKO010000002.1[1581000..1596063]	Achromobacter aegrifaciens	1287736	hypothetical protein_1	hypothetical protein	hypothetical protein	WP_175213718.1	174#WP_175213718.1#NZ_CADIKO010000002.1[1581000..1596063]	NA	1	636	MSITYRPPFDEDDERDLRALYRRHGPGANPELDAAVRRRWHPGHSWHPAWGAAACAAMVFGLFAWTEMREAQDFPEQNTPVITPHEIGTSSERAPALLSTPAQAPAEQSAPVTERVAAPPQETAPQAAPAQEAAPVAQETSPAEQPAAEPAAPETPALSDQDIEARVTHIRALVREEQQEEAVQALRELQQAAPDLTLPDDLQELAQQNPA	0	13277	13913	14	NA	NA	NA	no_plot	1287736	Achromobacter aegrifaciens	TRUE	NA	NA	1287736	Achromobacter aegrifaciens	222	Achromobacter	506	Alcaligenaceae	80840	Burkholderiales	28216	Betaproteobacteria	1224	Proteobacteria	2	Bacteria	131567	cellular organisms
175	NZ_CADIKO010000002.1[1581000..1596063]	Achromobacter aegrifaciens	1287736	homoprotocatechuate degradation operon regulator HpaR_1	homoprotocatechuate degradation operon regulator HpaR	homoprotocatechuate degradation operon regulator HpaR	WP_054452418.1	175#WP_054452418.1#NZ_CADIKO010000002.1[1581000..1596063]	NA	1	465	MSPSFHHRNLPHLLLYARETLMAHFRPILHAAGVTEQQWRVLRTLSEVGSMEPNQIARTCQILSPSLTRMLAGMQEQGLIKRTRSSADQRRQEISLTPKSNKLIDRMRPQVDAKYQEIEARIGKELLDRLYRDVDTMVELIKREPADARASEEE	0	14011	14476	15	NA	NA	NA	no_plot	1287736	Achromobacter aegrifaciens	TRUE	NA	NA	1287736	Achromobacter aegrifaciens	222	Achromobacter	506	Alcaligenaceae	80840	Burkholderiales	28216	Betaproteobacteria	1224	Proteobacteria	2	Bacteria	131567	cellular organisms
176	NZ_CADIKO010000002.1[1581000..1596063]	Achromobacter aegrifaciens	1287736	3,4-dihydroxyphenylacetate 2,3-dioxygenase_-1	3,4-dihydroxyphenylacetate 2,3-dioxygenase	3,4-dihydroxyphenylacetate 2,3-dioxygenase	WP_054452420.1	176#WP_054452420.1#NZ_CADIKO010000002.1[1581000..1596063]	NA	-1	588	MGKLALAAKVTHVPSMYLSELPGKHQGCREAAIQGHRIIGQRCRDLDVDSIVVLDVHWLVNGGYHVNCNSGFKGRYTSNELPHFIKDMDYAYRGNPQLGRRIAECANAAGVGTRSHEIDSLELEYGTLVPMRYMNGDGRFNVVSVAAWCAWHSLDESRRFGAALRQAIEASDSRVAVLASGSLSHRFNDNGSPEAAMHQISREFFRQVDLRVVELWRQGDWKAFCAMLPEYADLCVGEGGMHDTAMLLGLLGWDGYDQPVEIVTDYFASSGTGQINAIFPVPA	1	14476	15064	16	NA	NA	NA	no_plot	1287736	Achromobacter aegrifaciens	TRUE	NA	NA	1287736	Achromobacter aegrifaciens	222	Achromobacter	506	Alcaligenaceae	80840	Burkholderiales	28216	Betaproteobacteria	1224	Proteobacteria	2	Bacteria	131567	cellular organisms
177	NZ_CADIKU010000008.1[183624..198787]	Achromobacter animicus	1389935	30S ribosomal protein S20_1	30S ribosomal protein S20	30S ribosomal protein S20	WP_043542310.1	177#WP_043542310.1#NZ_CADIKU010000008.1[183624..198787]	NA	1	264	MANTAQARKRARQSVERNKHNSSLRSMLRTAIKRVRQSIAAGDKAAAGEVFQKATSVIDRVADKNIIHKNKAARHKSRLAAAIKALA	0	176	440	1	NA	NA	NA	no_plot	1389935	Achromobacter animicus	TRUE	NA	NA	1389935	Achromobacter animicus	222	Achromobacter	506	Alcaligenaceae	80840	Burkholderiales	28216	Betaproteobacteria	1224	Proteobacteria	2	Bacteria	131567	cellular organisms
178	NZ_CADIKU010000008.1[183624..198787]	Achromobacter animicus	1389935	LysR family transcriptional regulator_-1	LysR family transcriptional regulator	LysR family transcriptional regulator	WP_175138401.1	178#WP_175138401.1#NZ_CADIKU010000008.1[183624..198787]	NA	-1	918	MLTHRHIEVFRAVMIAGSVTKAADLLNTSQPTVSRELARMEQTIGFALFERIAGRLRATMPALALFEEVRQSYAGLERVASAAARLRAFREGQLSVITLPAFSHSILPDAFQRFHGQHPGVSLSVETQESPLLEEWLTAQRYDLGLTEHDAAPAGTRLELLVQVDEVCVLPDGHPLLARAAVKLADFEGHSFVSLSASDPYRVQIDEAFAQAGVLPRSIVETPTAVSVCTFVRQGLGLAIVNPLTALDFVGRGLHIRPLTRSFPFRVNVVFPEHRPGNPLVGAFMESLRDAAAAIKGRLAAAESA	0	638	1556	2	NA	NA	NA	no_plot	1389935	Achromobacter animicus	TRUE	NA	NA	1389935	Achromobacter animicus	222	Achromobacter	506	Alcaligenaceae	80840	Burkholderiales	28216	Betaproteobacteria	1224	Proteobacteria	2	Bacteria	131567	cellular organisms
179	NZ_CADIKU010000008.1[183624..198787]	Achromobacter animicus	1389935	diaminopimelate decarboxylase_1	diaminopimelate decarboxylase	diaminopimelate decarboxylase	WP_175138402.1	179#WP_175138402.1#NZ_CADIKU010000008.1[183624..198787]	NA	1	1233	MTFDPRQLTQLAAEHGTPLWVYDAAVIRERIAQLRRFDTIRYAQKACSNLHILRLMRAQGVVVDAVSLGEIERSLAAGFDPRSEPEGIVFTADLIDHATLATALKHGITVNAGSLDMLSRVGQASPGHRVWLRINPGFGHGHSNKTNTGGPQSKHGIWIDDVAEAISIVRRHGLKLVGVHMHIGSGVDYGHLSSVCDAMVDVVKSLDHDIEAISAGGGLSIPYRDGEPRIDCDHYFEQWDAARQRIAQYLGHEIRLEIEPGRFLIAESGVLVAEVHSINRRPERDFALVDAGFNDLMRPAMYGSYHRISVHAPDGSDPQDAPQTRIAVAGPLCESGDVFTQNEGGVMTDQLLPRPRIGDFMVFHNAGAYGSSMSSNYNSRPLAPEVLLDQGEARLIRRR…	0	1669	2902	3	NA	NA	NA	no_plot	1389935	Achromobacter animicus	TRUE	NA	NA	1389935	Achromobacter animicus	222	Achromobacter	506	Alcaligenaceae	80840	Burkholderiales	28216	Betaproteobacteria	1224	Proteobacteria	2	Bacteria	131567	cellular organisms
180	NZ_CADIKU010000008.1[183624..198787]	Achromobacter animicus	1389935	2-dehydro-3-deoxyglucarate aldolase_-1	2-dehydro-3-deoxyglucarate aldolase	2-dehydro-3-deoxyglucarate aldolase	WP_056562673.1	180#WP_056562673.1#NZ_CADIKU010000008.1[183624..198787]	NA	-1	768	MNSPLPNRFRQRILARERLIGFWMCMSSHITAELVGLADFDWLLLDGEHSPNEVPMFLQQLQALQGSASAAVGRPSWNDPVEIKRLLDIGFYNLLIPFIESEEDARRAVAATRYPPQGIRGVAGAMRSNRYGTVPDYLHTINDNICVLLQIESRPGIEAVDEIAAVEGVDGVFIGPSDLAAALGHIGNPGHPEVQEAIRHLHQRVTAQGKAVGILAPVHADARRYLDMGMHFVAVGTDLGVFKQATFALREAFPT	0	3010	3778	4	NA	NA	NA	no_plot	1389935	Achromobacter animicus	TRUE	NA	NA	1389935	Achromobacter animicus	222	Achromobacter	506	Alcaligenaceae	80840	Burkholderiales	28216	Betaproteobacteria	1224	Proteobacteria	2	Bacteria	131567	cellular organisms
181	NZ_CADIKU010000008.1[183624..198787]	Achromobacter animicus	1389935	Ldh family oxidoreductase_-1	Ldh family oxidoreductase	Ldh family oxidoreductase	WP_175138403.1	181#WP_175138403.1#NZ_CADIKU010000008.1[183624..198787]	NA	-1	1113	MSGNGANATAVPVEQVREQILQVLMAWGMAEDLAHITAGLMARTDLLGIDSHGISMLPAYEDKWRAGTLRLDARARVVRDGGASALIDGMGGLGYPVAAQAMNLAVDKALEHGVGAVSVCNSHHFGAAGVYARIAVERGVVGLVTSSANGVIMVPTRGAMPMLGTNPIAFGAPAAYNEPFVLDMATTTVAANKVKVYDFLDKPLPPGWAVDGQGAPVTDADAAMQYIFKRPEGGLTPLGGTTAMSSHKGYGLAMMAQILGGTLSGSAFAARRAGTRGPGEPDDVGHFFLALNPDAFRAAGSFETDMDDMIDAMHDTPPADPAEPVLVAGEPEAAERMRRLREGIPIPAALAERLRAICERAGTPYLLDPA	0	3870	4983	5	NA	NA	NA	no_plot	1389935	Achromobacter animicus	TRUE	NA	NA	1389935	Achromobacter animicus	222	Achromobacter	506	Alcaligenaceae	80840	Burkholderiales	28216	Betaproteobacteria	1224	Proteobacteria	2	Bacteria	131567	cellular organisms
182	NZ_CADIKU010000008.1[183624..198787]	Achromobacter animicus	1389935	FCD domain-containing protein_-1	FCD domain-containing protein	FCD domain-containing protein	WP_175138438.1	182#WP_175138438.1#NZ_CADIKU010000008.1[183624..198787]	NA	-1	702	MLERGHRVRLADQLYGQIFEQIVSGGLNVGDKLPSENEISERFGVSRPVVREALLRLRADGLITAHQGLGTFVSHQPAPRLKAFNDVQNVSAYLRAQEVRVALEGDAARLAALRRTDDQLGKIADAHAAFADTLAKGQVSAEADLAFHASIAEASGNDFYLGVLESIHESISGFMRLTLNLTRTGSRQRAQRVVDEHATILDAIREQDGERARVAMQFHLGQARHRLVDRDRD	0	5031	5733	6	NA	NA	NA	no_plot	1389935	Achromobacter animicus	TRUE	NA	NA	1389935	Achromobacter animicus	222	Achromobacter	506	Alcaligenaceae	80840	Burkholderiales	28216	Betaproteobacteria	1224	Proteobacteria	2	Bacteria	131567	cellular organisms
183	NZ_CADIKU010000008.1[183624..198787]	Achromobacter animicus	1389935	dihydrodipicolinate synthase family protein_-1	dihydrodipicolinate synthase family protein	dihydrodipicolinate synthase family protein	WP_175123492.1	183#WP_175123492.1#NZ_CADIKU010000008.1[183624..198787]	NA	-1	930	MKTTPVTAQDLQRSVIAVPPLARNADLSLNEAANKTLLGHLEAGGVRNVMYGGNANFYNVGVSEYARIVDMLASLAGPDTWILPSVGPDYGKMMDQAAILRSRAFPTAMLLPMSFPYTDAGLADGVRRFTDALGKPAVVYIKSADYLAPETAARLIEEGRLVAFKYAVVRDNPSEDAYLSALLQAVDSRWVVSGIGERPAIVHYREFGLKSFTSGSVCVAPRGSMRLLHLLQEGRFDEAEAVREQYMGLEDCRDGISPIRVLHDAVTLSGVADMGPMLPLLTGISSTERERVAPVARALAAWDRETATA	0	5919	6849	7	NA	NA	NA	no_plot	1389935	Achromobacter animicus	TRUE	NA	NA	1389935	Achromobacter animicus	222	Achromobacter	506	Alcaligenaceae	80840	Burkholderiales	28216	Betaproteobacteria	1224	Proteobacteria	2	Bacteria	131567	cellular organisms
184	NZ_CADIKU010000008.1[183624..198787]	Achromobacter animicus	1389935	tripartite tricarboxylate transporter substrate binding protein_1	tripartite tricarboxylate transporter substrate binding protein	tripartite tricarboxylate transporter substrate binding protein	WP_175138404.1	184#WP_175138404.1#NZ_CADIKU010000008.1[183624..198787]	NA	1	1002	MHAAPVRGRFIAAALLTATAFALPASPAFADYPEREVKIIVPFPAGGTADIAARVVAAELGKSWNKPVVVDNKAGAGGNVGSAEAARATPDGYTFLMGTVSTHAINQSVYAKLPYDPVKDFVPVTLVIPVPNVLEVNPKFADKHGIRNVADLIKYLKANPDSVNMASTGNGTSTHLSGELFQSMTGTRMTHVPYKGSSPALTDVMAGQADLIFDNLPSSMGFIKAGKLRPLAVTTANRSPALPDVPTMAEAGVKGYEASSWFGLLAPAGTPPAIVEKVQRDVAAALQQEPVRAQLQAQGATPSGNTPAQFKQFMAQETVKWADVVKKSGAKVD	0	7083	8085	8	tph_c	NA	NA	no_plot	1389935	Achromobacter animicus	TRUE	NA	NA	1389935	Achromobacter animicus	222	Achromobacter	506	Alcaligenaceae	80840	Burkholderiales	28216	Betaproteobacteria	1224	Proteobacteria	2	Bacteria	131567	cellular organisms
185	NZ_CADIKU010000008.1[183624..198787]	Achromobacter animicus	1389935	tripartite tricarboxylate transporter substrate binding protein_1	tripartite tricarboxylate transporter substrate binding protein	tripartite tricarboxylate transporter substrate binding protein	WP_175123494.1	185#WP_175123494.1#NZ_CADIKU010000008.1[183624..198787]	NA	1	972	MNKLISAVLAAGAVVLGSPAALAAGYPEKPVTMIVPFVPGGSSDITGRSVTPALAKILGQTFVVENKPGANSAIGAQALARSTPDGYTMMVGSIGTFAINEALYKNLSYNPSKDFTYLTQAVRNPNVLVAATSFPASTVAELVDYAKKNPNRVSYASSGTGSSDHLSAVLFRQRTQSTGVDVPYKGGGAAIADLIGGQVNVSFQNLGAVQNHIKAGKLKALAITGDTRATDLPDVPTLAEAGIKDMVVYSWQGFAVPKGTPQPVVDKLAEALRTALREPQTQKTLQGLGFEVVANTPQQFAEFQQAEVKRWKDVIQKANIQLE	0	8160	9132	9	NA	NA	NA	no_plot	1389935	Achromobacter animicus	TRUE	NA	NA	1389935	Achromobacter animicus	222	Achromobacter	506	Alcaligenaceae	80840	Burkholderiales	28216	Betaproteobacteria	1224	Proteobacteria	2	Bacteria	131567	cellular organisms
186	NZ_CADIKU010000008.1[183624..198787]	Achromobacter animicus	1389935	2-hydroxyacid dehydrogenase_1	2-hydroxyacid dehydrogenase	2-hydroxyacid dehydrogenase	WP_175138405.1	186#WP_175138405.1#NZ_CADIKU010000008.1[183624..198787]	NA	1	957	MTTKQRIIQVGSLAGSPSANKRLADGYDVIELWKYPDRKAALAEHGKGVTAVVTSANFGANAELINALPDLKAICSWGVGYETIDVDAARKRGVLVSNTPDVLTDCVADLAWGLLIAGARRMGQGERFVRAGQWGQVHGSIPLGLRVSGKKLGIVGLGRIGEAIAKRGTGFDMDVRYHNRRKRDDVDYGYEASLTDLAKWADFLIVATVGGPSTRHLVNREVLEALGPKGIIVNIARGPVIDETALVAALEDGKLGCAALDVFEHEPKVPEALIKSDKAVLLPHIGSATEETRLAMEDMMLENLQSFFENGRVITPVE	0	9263	10220	10	NA	NA	NA	no_plot	1389935	Achromobacter animicus	TRUE	NA	NA	1389935	Achromobacter animicus	222	Achromobacter	506	Alcaligenaceae	80840	Burkholderiales	28216	Betaproteobacteria	1224	Proteobacteria	2	Bacteria	131567	cellular organisms
187	NZ_CADIKU010000008.1[183624..198787]	Achromobacter animicus	1389935	hypothetical protein_-1	hypothetical protein	hypothetical protein	WP_175123496.1	187#WP_175123496.1#NZ_CADIKU010000008.1[183624..198787]	NA	-1	219	MTTHSRIAAFLSTSALCLGLAAAPSAFAAGASKTGDTKTQAHHKHHKADKSSAKHSAGAATNHKSGATTPTK	0	10374	10593	11	NA	NA	NA	no_plot	1389935	Achromobacter animicus	TRUE	NA	NA	1389935	Achromobacter animicus	222	Achromobacter	506	Alcaligenaceae	80840	Burkholderiales	28216	Betaproteobacteria	1224	Proteobacteria	2	Bacteria	131567	cellular organisms
188	NZ_CADIKU010000008.1[183624..198787]	Achromobacter animicus	1389935	TSUP family transporter_-1	TSUP family transporter	TSUP family transporter	WP_175138406.1	188#WP_175138406.1#NZ_CADIKU010000008.1[183624..198787]	NA	-1	780	MSLFVIAACLAAGCMIGFMGGVLGIGGGLIAIPALVLLMGMSQQLAQGTALIMVLPTIMMAVRKYNQQTRIDKRVALAGAAGAVVFTWVGAQMALGIDSTLLRQSFAVFLFFIALFYVWQTWRASRPAARHAPRPTRATPVFTPRRASVLGMLCGTLGGFFGVGGAVLAVPIITSVFRLPQTAAQALALSMVIPGSMIALVTYTWAGQANWMVGAPLAIGSLIFVPIGVRLAYRLPERKLRACFALMLFATVALLAFEG	0	10835	11615	12	NA	NA	NA	no_plot	1389935	Achromobacter animicus	TRUE	NA	NA	1389935	Achromobacter animicus	222	Achromobacter	506	Alcaligenaceae	80840	Burkholderiales	28216	Betaproteobacteria	1224	Proteobacteria	2	Bacteria	131567	cellular organisms
189	NZ_CADIKU010000008.1[183624..198787]	Achromobacter animicus	1389935	DNA repair protein RadA_-1	DNA repair protein RadA	DNA repair protein RadA	WP_175123498.1	189#WP_175123498.1#NZ_CADIKU010000008.1[183624..198787]	NA	-1	1362	MAKTRTVYVCADCGGTTPKWQGKCPHCNAWNTLEETVESSAPAAAAHRYAPLASSSPVRSLSEIEARETPRTPTGLDEFDRVLGGGLVAGAVVLIGGDPGIGKSTLLLQALASLSESTNVLYVTGEESAEQVALRARRLGLQTGNVNLLAEIRLEAIQAAVSEQKPSVAVIDSIQTLYSGELTAAPGSVSQVRECAAQLTRLAKQTGIAIVMIGHVTKDGALAGPRVLEHIVDTVLYFEGDTHSSFRLVRAFKNRFGAVNELGVFAMTDRGLRGVANPSALFLSQHEQQVAGSCVMATQEGTRPLLVEIQALVDSSHAPNPRRLTVGLEGNRLAMLLAVLHRHAGVSTFDQDVFVNAVGGVRITEPAADLPVLLAIMSSLRDRPLPRGLIAFGEVGLAG…	0	11643	13005	13	NA	NA	NA	no_plot	1389935	Achromobacter animicus	TRUE	NA	NA	1389935	Achromobacter animicus	222	Achromobacter	506	Alcaligenaceae	80840	Burkholderiales	28216	Betaproteobacteria	1224	Proteobacteria	2	Bacteria	131567	cellular organisms
190	NZ_CADIKU010000008.1[183624..198787]	Achromobacter animicus	1389935	hypothetical protein_1	hypothetical protein	hypothetical protein	WP_175138407.1	190#WP_175138407.1#NZ_CADIKU010000008.1[183624..198787]	NA	1	702	MSITYRPPFDEDDERDLRALYRKPGPGANPELDAAVRRRWHPGHSWHPGWGAAACAVMVAGLFAWTDMREAIEDTEPQMQLVAVQESDAAQTAPSASAAPASDPSPLRRVVALQQEPAVPAQPAVSQPASTQPVSTHPAAAQSAAAAAPAEPAAPETAAQESAQAAAQEAPAQAQQVAAFTEQDIEARVAQIRGLIVDDREEDAVQALRELQRGAPDFALPDDLQELSRQNPA	0	13423	14125	14	NA	NA	NA	no_plot	1389935	Achromobacter animicus	TRUE	NA	NA	1389935	Achromobacter animicus	222	Achromobacter	506	Alcaligenaceae	80840	Burkholderiales	28216	Betaproteobacteria	1224	Proteobacteria	2	Bacteria	131567	cellular organisms
191	NZ_CADIKU010000008.1[183624..198787]	Achromobacter animicus	1389935	homoprotocatechuate degradation operon regulator HpaR_1	homoprotocatechuate degradation operon regulator HpaR	homoprotocatechuate degradation operon regulator HpaR	WP_105239511.1	191#WP_105239511.1#NZ_CADIKU010000008.1[183624..198787]	NA	1	462	MSPSFHHRNLPHLLLYARETLMAHFRPILHAAGVTEQQWRVLRTLSEVGSLEPNQIARACQILSPSLTRMLAGMEEQGLIKRTRSSADQRRQEISLTAKSNKLIDRMRPQVDAKYQEIEERIGKELLERLYTDVDAMVDLIKRDGPTRDAGTP	0	14313	14775	15	NA	NA	NA	no_plot	1389935	Achromobacter animicus	TRUE	NA	NA	1389935	Achromobacter animicus	222	Achromobacter	506	Alcaligenaceae	80840	Burkholderiales	28216	Betaproteobacteria	1224	Proteobacteria	2	Bacteria	131567	cellular organisms
192	NZ_CADIKU010000008.1[183624..198787]	Achromobacter animicus	1389935	4-hydroxy-2-oxoheptanedioate aldolase_1	4-hydroxy-2-oxoheptanedioate aldolase	4-hydroxy-2-oxoheptanedioate aldolase	WP_175138408.1	192#WP_175138408.1#NZ_CADIKU010000008.1[183624..198787]	NA	1	349	MDLLTNTFKQALRDGKPQIGLWAGLASAYTSEILAGAGFDWLLIDGEHAPNTLDSTLAQLQSVAAYPVAPVVRPAWNDPVQIKQILDTGAQTVLVPMIQSAQEAAAAVAAVRYPPQGIRGVGSALARASRWNRIPNYLERANDQMCVLVQIETPDGIAALDEILAVDGVDGVFIGPADLSASMGYLGQPEHPVVEKTIDDAIARIVRSGKAAGILHSGVKQAKHYLSLGATFVAVGVDAVLLARAAEALAGEFKELAAVGASKGPY	1	14815	15164	16	NA	NA	NA	no_plot	1389935	Achromobacter animicus	TRUE	NA	NA	1389935	Achromobacter animicus	222	Achromobacter	506	Alcaligenaceae	80840	Burkholderiales	28216	Betaproteobacteria	1224	Proteobacteria	2	Bacteria	131567	cellular organisms
193	NZ_CADILD010000002.1[1368224..1383307]	Achromobacter piechaudii	72556	LysR family transcriptional regulator_-1	LysR family transcriptional regulator	LysR family transcriptional regulator	WP_175128986.1	193#WP_175128986.1#NZ_CADILD010000002.1[1368224..1383307]	NA	-1	567	MLTHRHIEVFRAVMIAGSVTRAAQLLNTSQPTISRELARMEQGIGFALFERVHGRLRPTMPALALYDEIRQSYAGLERVASAAARLREFRGGQLSVIALPAFSHSILPDAFRRFHDQHSGVSLSVETQESPFLEEWLTAQRYDLGLTEHDAAPAGTRVRLLLQVDEVCVLPDGHPLLARREIDLPDFAGHAFVSLSANDPYRIQIDEAFAQAGVARRSIVETPTAVSVCTFVRQGLGLAIVNPLTALDFAGRGLHIRPLRPSLPFRVNAVFPEHRPANPLVDAFMASLSDAADAILARLADTAEASAT	1	0	567	1	NA	NA	NA	no_plot	72556	Achromobacter piechaudii	TRUE	NA	NA	72556	Achromobacter piechaudii	222	Achromobacter	506	Alcaligenaceae	80840	Burkholderiales	28216	Betaproteobacteria	1224	Proteobacteria	2	Bacteria	131567	cellular organisms
194	NZ_CADILD010000002.1[1368224..1383307]	Achromobacter piechaudii	72556	diaminopimelate decarboxylase_1	diaminopimelate decarboxylase	diaminopimelate decarboxylase	WP_175128987.1	194#WP_175128987.1#NZ_CADILD010000002.1[1368224..1383307]	NA	1	1233	MAFDPRQLTQLATQHGTPLWVYDAAVIRERIAQLRRFDTIRYAQKACSNLHILRLMREEGAVVDAVSLGEIERSLAAGFDPKGEPEGMVFTADLIDHATLDTVLRHGITVNAGSLDMLDRVGQASPGHRVWLRINPGFGHGHSNKTNTGGPQSKHGIWIDDVAEAVAIVRRHGLKLVGIHMHIGSGVDYGHLSSVCDAMVDVVRSLDHDIEAISAGGGLSIPYRDGEPRIDCDHYFEQWDAARKRIEQFLSHPIRLEIEPGRFLIAEAGVLVTEVHAVNHRPERDFALVDAGFNDLMRPAMYGSFHRISVHAPDGSDPSGVEQTRIAVAGPLCESGDVFTQEEGGVMSDQLLPQPRIGDFMVLHNAGAYGSSMSSNYNTRPLAPEVLLDQGQARLIRRR…	0	681	1914	2	NA	NA	NA	no_plot	72556	Achromobacter piechaudii	TRUE	NA	NA	72556	Achromobacter piechaudii	222	Achromobacter	506	Alcaligenaceae	80840	Burkholderiales	28216	Betaproteobacteria	1224	Proteobacteria	2	Bacteria	131567	cellular organisms
195	NZ_CADILD010000002.1[1368224..1383307]	Achromobacter piechaudii	72556	2-dehydro-3-deoxyglucarate aldolase_-1	2-dehydro-3-deoxyglucarate aldolase	2-dehydro-3-deoxyglucarate aldolase	WP_006220300.1	195#WP_006220300.1#NZ_CADILD010000002.1[1368224..1383307]	NA	-1	768	MNSPLPNRFRQRILARERLIGFWMCMSSHITAELVGLADFDWLLLDGEHSPNEVPMFLQQLQALQGSASAAVGRPSWNDPVQIKRLLDIGFYNLLIPFIESEADARLAVAATRYPPQGIRGVAGAQRSNRYGTVPDYLQTINDNICVLLQIESRPGIEAVDEIAAVEGVDGVFIGPSDLAAALGHIGNPGHPEVQETIRHLHQRVSAQGKAVGILAPVHADARRYLDMGMHFVAVGTDLGVFKQATFALRDAFPT	0	1975	2743	3	NA	NA	NA	no_plot	72556	Achromobacter piechaudii	TRUE	NA	NA	72556	Achromobacter piechaudii	222	Achromobacter	506	Alcaligenaceae	80840	Burkholderiales	28216	Betaproteobacteria	1224	Proteobacteria	2	Bacteria	131567	cellular organisms
196	NZ_CADILD010000002.1[1368224..1383307]	Achromobacter piechaudii	72556	tripartite tricarboxylate transporter substrate binding protein_-1	tripartite tricarboxylate transporter substrate binding protein	tripartite tricarboxylate transporter substrate binding protein	WP_175128988.1	196#WP_175128988.1#NZ_CADILD010000002.1[1368224..1383307]	NA	-1	1002	MQERKNLARRRFAVLAAATLGAMTLLPVTALAQSGAWPAKPVKLIVPFPAGGSTDSVGRLLAAELSKELGQSVIVENKGGANGNIGSDVVAKAEPDGYTLLLSGVGSNAISYAVYQNMPYRNSDFAHISLLATGPNVLVANMEFPGKTFADFIKLARENPGKYTHASSGSGSSGHLAMEMLKQDAKIDLVHVPYKGGAAAITDMIGGRVSVMFLNQDTLLPQVRSGKLRALAVASAKRNPAYPDTPTVAESGYPGFSAESWFGLSAPAKTPPAVIQRLNQATVKALGSPEIRQKLEAVGFVVVGDDPKSFSAFVDNEITKWGKAAKASGARMD	0	2820	3822	4	NA	NA	NA	no_plot	72556	Achromobacter piechaudii	TRUE	NA	NA	72556	Achromobacter piechaudii	222	Achromobacter	506	Alcaligenaceae	80840	Burkholderiales	28216	Betaproteobacteria	1224	Proteobacteria	2	Bacteria	131567	cellular organisms
197	NZ_CADILD010000002.1[1368224..1383307]	Achromobacter piechaudii	72556	Ldh family oxidoreductase_-1	Ldh family oxidoreductase	Ldh family oxidoreductase	WP_050730071.1	197#WP_050730071.1#NZ_CADILD010000002.1[1368224..1383307]	NA	-1	1113	MQGNEATARNVPVEQVREQILQVLQAWGMDEDLAHTTAGLMARTDLLGIDSHGISMLPSYEEKWRAGSLRLDARARIVRDSGASALLDGMGGLGYPVAAQAMHMAVDKALEHGVGAVSVCNSHHFGAAGVYARIAVERGVVGLVTSSANGIIMVPTRGAMPMLGTNPIAFGAPAAHNEPFVLDMATTTVAANKVKVYDFLGKPLPPGWAVDGQGGAVTDANAAMQYIFQQPEGGLTPLGGTPAMSSHKGYGLAMMAQILGGTLSGSAFAARRAPTRKPGEPDDVGHFFLALNPDAFRAAGSFESDMDDMIDALHDTPPANADEPVLVAGEPEAAEHARRLRAGIPISAALAERLRGICERAGTPYLLDDI	0	3918	5031	5	NA	NA	NA	no_plot	72556	Achromobacter piechaudii	TRUE	NA	NA	72556	Achromobacter piechaudii	222	Achromobacter	506	Alcaligenaceae	80840	Burkholderiales	28216	Betaproteobacteria	1224	Proteobacteria	2	Bacteria	131567	cellular organisms
198	NZ_CADILD010000002.1[1368224..1383307]	Achromobacter piechaudii	72556	FadR family transcriptional regulator_-1	FadR family transcriptional regulator	FadR family transcriptional regulator	WP_006220303.1	198#WP_006220303.1#NZ_CADILD010000002.1[1368224..1383307]	NA	-1	774	MARSKSTTSPQAQTPAEADAAGSHVLERGHRVRLADQVYGQIFEQIVSGGLNVGDKLPSENEISERFGVSRPVVREALLRLRADGLITAHQGLGTFVSHQPAPRLKTFNDVQNVSAYLRAQEVRVALEGDAARLAALRRTDEQLKKIADAHAAFADSLTHGQVSPEADLAFHASIAEASGNDFYLGVLESIHESINGFMRLTLSLTRTGSRQRAQRVVDEHATILDAIREQDSERARVAMQFHLGQARHRLVDRERD	0	5085	5859	6	NA	NA	NA	no_plot	72556	Achromobacter piechaudii	TRUE	NA	NA	72556	Achromobacter piechaudii	222	Achromobacter	506	Alcaligenaceae	80840	Burkholderiales	28216	Betaproteobacteria	1224	Proteobacteria	2	Bacteria	131567	cellular organisms
199	NZ_CADILD010000002.1[1368224..1383307]	Achromobacter piechaudii	72556	dihydrodipicolinate synthase family protein_-1	dihydrodipicolinate synthase family protein	dihydrodipicolinate synthase family protein	WP_175128989.1	199#WP_175128989.1#NZ_CADILD010000002.1[1368224..1383307]	NA	-1	930	MKTSPVTAQDLQRSVIAVPPLARHDDLSLNEAANKALLGHLEAGGVRNVMYGGNANFYNVGVSEYARIVDMLAGLAGSDTWILPSVGPDYGKMMDQAAILRSRAFPTAMLLPMSFPYTDAGLAEGVRRFTDALGKPAVVYIKSADYLAPETAARLIEEGRIAAFKYAVVRDDPTKDAYLSSLLESVDLQWIVSGIGERPAIVHYRDFGLKSFTSGSVCVAPRGSMHLLHLLREGRYDEAQAVREHYLGLEDCRDGISPIRVLHDAVTLSGVADMGPMLPLLTGISSAERERVAPVARALAAWDREAVAA	0	5962	6892	7	NA	NA	NA	no_plot	72556	Achromobacter piechaudii	TRUE	NA	NA	72556	Achromobacter piechaudii	222	Achromobacter	506	Alcaligenaceae	80840	Burkholderiales	28216	Betaproteobacteria	1224	Proteobacteria	2	Bacteria	131567	cellular organisms
200	NZ_CADILD010000002.1[1368224..1383307]	Achromobacter piechaudii	72556	tripartite tricarboxylate transporter substrate binding protein_1	tripartite tricarboxylate transporter substrate binding protein	tripartite tricarboxylate transporter substrate binding protein	WP_175128990.1	200#WP_175128990.1#NZ_CADILD010000002.1[1368224..1383307]	NA	1	1002	MHAPIARRRLIVAASLTAIALALPAAQAHADYPERDVKIIVPFPAGGTADIAARVVAAELGKSWNKSVVVDNKAGAGGNVGTAEAARATADGYTLLMGTVSTHAINQSVYSKLPYDPVKDFVPVTLVIPVPNILELNPTFADKHGIRTVADLIKYLKANPNSVNMASTGNGTSTHLSGELFQTMTGTQMTHVPYKGSSPALTDVMGGSADLIFDNLPSSMGYIKGGKLRPLAVTTTARSPALPDVPTMAEAGVKGYEASSWFGLLAPAGTPPAIVEKIQRDVAAALQQAPVRAQLQAQGATPSGNTPTQFKQFMAQETVKWAEVVKTSGAKVD	0	7123	8125	8	tph_c	NA	NA	no_plot	72556	Achromobacter piechaudii	TRUE	NA	NA	72556	Achromobacter piechaudii	222	Achromobacter	506	Alcaligenaceae	80840	Burkholderiales	28216	Betaproteobacteria	1224	Proteobacteria	2	Bacteria	131567	cellular organisms
201	NZ_CADILD010000002.1[1368224..1383307]	Achromobacter piechaudii	72556	tripartite tricarboxylate transporter substrate binding protein_1	tripartite tricarboxylate transporter substrate binding protein	tripartite tricarboxylate transporter substrate binding protein	WP_175128991.1	201#WP_175128991.1#NZ_CADILD010000002.1[1368224..1383307]	NA	1	972	MNKLFCAAAAAGAVLLAGPAAQAAGYPEKPVTMIVPFVPGGSSDITARSVTPALSKILGQTFVVENKPGANSAIGAQALARSTADGYTMMVGSIGTFAINEALYKNLSYNPSKDFSYLTQAVRNPNVLVAAPSFPATTVAELVAYAKKNPGSVSYASSGTGSSDHLSAVLFRQRTDSTGVDVPYKGGGAAIADLIGGQVNVSFQNLGAVQNHIKAGKLKALAITGDTRAPDLPNVPTLAEAGIKDMVVYSWQGFAVPKGTPPAVVEQLSKALQTALRDPKTEQTLQGLGFEVVANTPQQFTAFQQGEVKRWKDVIQKANIQLE	0	8199	9171	9	NA	NA	NA	no_plot	72556	Achromobacter piechaudii	TRUE	NA	NA	72556	Achromobacter piechaudii	222	Achromobacter	506	Alcaligenaceae	80840	Burkholderiales	28216	Betaproteobacteria	1224	Proteobacteria	2	Bacteria	131567	cellular organisms
202	NZ_CADILD010000002.1[1368224..1383307]	Achromobacter piechaudii	72556	2-hydroxyacid dehydrogenase_1	2-hydroxyacid dehydrogenase	2-hydroxyacid dehydrogenase	WP_175128992.1	202#WP_175128992.1#NZ_CADILD010000002.1[1368224..1383307]	NA	1	957	MTTKHRIIQVGSLAGSPSANKNLADRYDVVELWKFPDRKAALAEHGKGITAVVTSANFGADADLINALPDLKAICSWGVGYETIDVQAAKQRGVQVSNTPDVLTDCVADLAWGLLIAGARRMGQGERFVRAGQWGQVHGSIPLGQRVSGKKLGIVGLGRIGEAIAKRGTGFDMDVRYHNRRKRDDIAYGYEASLVDLAAWADFLVVATVGGPSTRHLVNQAVLEALGPKGIIVNIARGPVIDEAALVAALESGKLGCAALDVFEHEPKVPQALMTSDNAVILPHIGSATLETRLAMENLMLDNLRAYFDTGTVITPVE	0	9276	10233	10	NA	NA	NA	no_plot	72556	Achromobacter piechaudii	TRUE	NA	NA	72556	Achromobacter piechaudii	222	Achromobacter	506	Alcaligenaceae	80840	Burkholderiales	28216	Betaproteobacteria	1224	Proteobacteria	2	Bacteria	131567	cellular organisms
203	NZ_CADILD010000002.1[1368224..1383307]	Achromobacter piechaudii	72556	hypothetical protein_-1	hypothetical protein	hypothetical protein	WP_050730069.1	203#WP_050730069.1#NZ_CADILD010000002.1[1368224..1383307]	NA	-1	240	MTTHSRIAAFLSTSALCLGLAAAPSAFAAGADATTKAGDTKTHAQHKHHKSDKTSAKPAAAKSGTASKMDHSGATTPAK	0	10379	10619	11	NA	NA	NA	no_plot	72556	Achromobacter piechaudii	TRUE	NA	NA	72556	Achromobacter piechaudii	222	Achromobacter	506	Alcaligenaceae	80840	Burkholderiales	28216	Betaproteobacteria	1224	Proteobacteria	2	Bacteria	131567	cellular organisms
204	NZ_CADILD010000002.1[1368224..1383307]	Achromobacter piechaudii	72556	TSUP family transporter_-1	TSUP family transporter	TSUP family transporter	WP_175128993.1	204#WP_175128993.1#NZ_CADILD010000002.1[1368224..1383307]	NA	-1	828	MSLLVIAACLAAGSLIGFMGGVLGIGGGLIAIPALVLLMGMSQQLAQGTALIMVLPAITMAVRKYNQQTRIDKRVAAAGAAGAVVFTWVGARLALGIDSSVLRRSFAVFLFFIAVFYVWQTWRAGRLAARRKSGDQHPQPASGKHAEKHAEKPAAPAFTPRRASVLGMLCGTLGGFFGVGGAVLAVPIITTVFRLSQTTAQALALSMVIPGSTIALITYGWAGQADWMVGVPLAIGSLLFVPIGVRLAYKLPERKLRASFALMLFATVALLAFES	0	10781	11609	12	NA	NA	NA	no_plot	72556	Achromobacter piechaudii	TRUE	NA	NA	72556	Achromobacter piechaudii	222	Achromobacter	506	Alcaligenaceae	80840	Burkholderiales	28216	Betaproteobacteria	1224	Proteobacteria	2	Bacteria	131567	cellular organisms
205	NZ_CADILD010000002.1[1368224..1383307]	Achromobacter piechaudii	72556	DNA repair protein RadA_-1	DNA repair protein RadA	DNA repair protein RadA	WP_006220311.1	205#WP_006220311.1#NZ_CADILD010000002.1[1368224..1383307]	NA	-1	1362	MAKSRTVYVCAECGGTTPKWQGKCPHCNAWNTLEETVESSNPTAAAHRYAPLASASPVRSLSEIEARETPRQPTGLDEFDRVLGGGLVAGAVVLIGGDPGIGKSTLLLQALASLSETTSVLYVTGEESAEQVALRARRLDLQTGNVNLLAEIRLEAIQAAVSEQKPTVAVIDSIQTLYSGELSAAPGSVSQVRECAAQLTRLAKQTGIAIVMIGHVTKDGALAGPRVLEHIVDTVLYFEGDTHSSFRLVRAFKNRFGAVNELGVFAMTDRGLRGVANPSALFLSQHEQQVAGSCVMATQEGTRPLLVEIQALVDSSHAPNPRRLTVGLEGNRLAMLLAVLHRHAGVTTFDQDVFVNAVGGVRITEPAADLPVLLAIMSSLRDKPLPRGLIAFGEVGLAG…	0	11655	13017	13	NA	NA	NA	no_plot	72556	Achromobacter piechaudii	TRUE	NA	NA	72556	Achromobacter piechaudii	222	Achromobacter	506	Alcaligenaceae	80840	Burkholderiales	28216	Betaproteobacteria	1224	Proteobacteria	2	Bacteria	131567	cellular organisms
206	NZ_CADILD010000002.1[1368224..1383307]	Achromobacter piechaudii	72556	hypothetical protein_1	hypothetical protein	hypothetical protein	WP_175128994.1	206#WP_175128994.1#NZ_CADILD010000002.1[1368224..1383307]	NA	1	654	MSITYRPPFDEDDERDLRALYRKPRPGSSPELDAAVRRTWHPGHSWHPGWAAAACAAMVAGLFAWTDMREAADMQETSAPLTATRDSSADRTPAPVALTDALATRQPAPVAQRVAAPQTDAAVTPTAPSAPVTAAVVTQDAQVQAAPAGVAQEGDAAATQVMAFSDADIEARVAHIRQLVQDDQQADAVQALRELQQGAPDLTLPDDLQELADQNPA	0	13376	14030	14	NA	NA	NA	no_plot	72556	Achromobacter piechaudii	TRUE	NA	NA	72556	Achromobacter piechaudii	222	Achromobacter	506	Alcaligenaceae	80840	Burkholderiales	28216	Betaproteobacteria	1224	Proteobacteria	2	Bacteria	131567	cellular organisms
207	NZ_CADILD010000002.1[1368224..1383307]	Achromobacter piechaudii	72556	homoprotocatechuate degradation operon regulator HpaR_1	homoprotocatechuate degradation operon regulator HpaR	homoprotocatechuate degradation operon regulator HpaR	WP_175128995.1	207#WP_175128995.1#NZ_CADILD010000002.1[1368224..1383307]	NA	1	474	MSPSFHHRNLPHLLLYARETLMAHFRPVLHAAGVTEQQWRVLRTLSESGAMEPNQIARSCQILSPSLTRMLAGMEEQGLIKRVRSSADQRRQEISLTPKSHKLIDRMRPHVDAKYQEIEAKIGKELLDRLYQDVDTMVELIRRDPAASAESRDAADA	0	14182	14656	15	NA	NA	NA	no_plot	72556	Achromobacter piechaudii	TRUE	NA	NA	72556	Achromobacter piechaudii	222	Achromobacter	506	Alcaligenaceae	80840	Burkholderiales	28216	Betaproteobacteria	1224	Proteobacteria	2	Bacteria	131567	cellular organisms
208	NZ_CADILD010000002.1[1368224..1383307]	Achromobacter piechaudii	72556	3,4-dihydroxyphenylacetate 2,3-dioxygenase_-1	3,4-dihydroxyphenylacetate 2,3-dioxygenase	3,4-dihydroxyphenylacetate 2,3-dioxygenase	WP_006221867.1	208#WP_006221867.1#NZ_CADILD010000002.1[1368224..1383307]	NA	-1	424	MGKLALAAKVTHVPSMYLSELPGKHHGCREAAIEGHRVIGQRCRELDVDTIVVLDVHWLVNAGYHVNANRAFKGCYTSNELPHFIKDMHYAYDGNPDLGRRIAECANAAGVGTRSHEIDSLELEYGTLVPMRYMNGDARFKVVSVAAWCAWHSLDESRRFGAALRQAIDGYEGRVAVLASGSLSHRFNDNNSPEAAMHQISREFFRQVDLRVVELWRQGDWKSFCAMLPEYADLCVGEGGMHDTAMLLGLLGWDGYDKPVEIVTDYFTSSGTGQINAIFPVPD	1	14660	15084	16	NA	NA	NA	no_plot	72556	Achromobacter piechaudii	TRUE	NA	NA	72556	Achromobacter piechaudii	222	Achromobacter	506	Alcaligenaceae	80840	Burkholderiales	28216	Betaproteobacteria	1224	Proteobacteria	2	Bacteria	131567	cellular organisms
209	NZ_CP010537.1[89911..105132]	Cupriavidus basilensis	68895	phosphonate metabolism protein/1,5-bisphosphokinase (PRPP-forming) PhnN_-1	phosphonate metabolism protein/1,5-bisphosphokinase (PRPP-forming) PhnN	phosphonate metabolism protein/1,5-bisphosphokinase (PRPP-forming) PhnN	WP_052494840.1	209#WP_052494840.1#NZ_CP010537.1[89911..105132]	NA	-1	1362	MAMKNHETWNDTCTSSLEAARYPNRVGPSALAAVSTTRDKPMQAAGTLFLVVGPSGAGKDSLMDGARAALLADPRYVFARRVITRPTGSPGEDHEGVTQVEFSAREAANAFLITWAAHGLRYGLPASLLDELERGRHVIANGSRGIVAALAGQLRNFVVIHVTAPLQVLAQRIAARGRESGDAVLRRLERMPDPIPAGVASVCVSNDAAMDVGIARFLEALRTAPAPLKARRMPIATGDAHIAYVSPAFSAGQTRMAVRSGTVEIPAALHVVESPALLQDEEIGLSDALFDRLGAAPGSTVRLRRIPGPVSRDVLRKKLRGDALSEAEYEAVLRDAVEGRYTEIELTAFLVAASQHLTDAEVVSVARARTRFAPRIGWDEPIVVDKHSMGGVPGSRITL…	1	0	1362	1	NA	NA	NA	no_plot	68895	Cupriavidus basilensis	TRUE	NA	NA	68895	Cupriavidus basilensis	106589	Cupriavidus	119060	Burkholderiaceae	80840	Burkholderiales	28216	Betaproteobacteria	1224	Proteobacteria	2	Bacteria	131567	cellular organisms
210	NZ_CP010537.1[89911..105132]	Cupriavidus basilensis	68895	MarR family transcriptional regulator_1	MarR family transcriptional regulator	MarR family transcriptional regulator	WP_043352765.1	210#WP_043352765.1#NZ_CP010537.1[89911..105132]	NA	1	546	MATSKLTETQAPAQPGDIANERLAHMVKDAARAYIRALQMRLAEHTVSYGHWTILRILWDHDGLSQRELSDLAGVTEPTTFAAVKALEALGYIERTHLPGNKKNVHVFLTKTGRALKRKLVPLAEEVNEISVEGVSAEEVATARKVLIAINRNLAKDEAAAQGTARRVPSTRELGRLLADL	0	1810	2356	2	NA	NA	NA	no_plot	68895	Cupriavidus basilensis	TRUE	NA	NA	68895	Cupriavidus basilensis	106589	Cupriavidus	119060	Burkholderiaceae	80840	Burkholderiales	28216	Betaproteobacteria	1224	Proteobacteria	2	Bacteria	131567	cellular organisms
211	NZ_CP010537.1[89911..105132]	Cupriavidus basilensis	68895	carboxylating nicotinate-nucleotide diphosphorylase_-1	carboxylating nicotinate-nucleotide diphosphorylase	carboxylating nicotinate-nucleotide diphosphorylase	WP_043352766.1	211#WP_043352766.1#NZ_CP010537.1[89911..105132]	NA	-1	837	MYDSFATDKLIDLWLTEDIGACDLTVHTMIEKGETGSFYMNAREPMLIAGVDVAARVFSRYDPSLHVDVRVNDGDKVAKGAILIAVSGSARSVLTAERTALNIMQRLCGIANHTARYVEAIAGTKARLIDSRKTTPGLRVLEKHAVTCGGGLNHRLGLDNGVMIKDNHIAVCGSIAAAVARARRQLPVLTKLEVECDRLDQVREALQAGVDVIMLDNMSVPDMREAVAIVNGRTKVEASGGINLETIRPIAETGVDYISTSKITQSAPAVDIGLDDAV	0	2506	3343	3	NA	NA	NA	no_plot	68895	Cupriavidus basilensis	TRUE	NA	NA	68895	Cupriavidus basilensis	106589	Cupriavidus	119060	Burkholderiaceae	80840	Burkholderiales	28216	Betaproteobacteria	1224	Proteobacteria	2	Bacteria	131567	cellular organisms
212	NZ_CP010537.1[89911..105132]	Cupriavidus basilensis	68895	antibiotic biosynthesis monooxygenase_1	antibiotic biosynthesis monooxygenase	antibiotic biosynthesis monooxygenase	WP_043352767.1	212#WP_043352767.1#NZ_CP010537.1[89911..105132]	NA	1	300	MILEIAQFQIKPGTEPDFEAAVAKAAPLFKRARGCHAMRLLRSIENPSHFTLEVKWETVENHMVDFRESADFAEWRKLVGDYFAAAPDVGHVSVAVEGF	0	3590	3890	4	NA	NA	NA	no_plot	68895	Cupriavidus basilensis	TRUE	NA	NA	68895	Cupriavidus basilensis	106589	Cupriavidus	119060	Burkholderiaceae	80840	Burkholderiales	28216	Betaproteobacteria	1224	Proteobacteria	2	Bacteria	131567	cellular organisms
213	NZ_CP010537.1[89911..105132]	Cupriavidus basilensis	68895	LysR family transcriptional regulator_-1	LysR family transcriptional regulator	LysR family transcriptional regulator	WP_043352769.1	213#WP_043352769.1#NZ_CP010537.1[89911..105132]	NA	-1	879	MEFRHLRYFLVLAEELHFGRAARRLSISQPPLSLNIQQLEASVGARLFERDSRGVRLTAAGRAFRESASALLAQAEEARLLAREIEAGAVGRLRIGFVGSMLYRGLPQRLREFQASYPGIQVALTELNSQEQIDALLHDGLDAGFIHTDRVPSELATALVHSEPFLCCVPHDHRLARQATVALSELRGEPFVLFSRKASPDYYNRIFEMCAAQGFYPQIRHEVRHWLSVVSLVSQGTGVAVVPAALQRSAMAGAVFLPLAQATVPSEVYCVWKAGTDEPARDRFLEKMRDEN	0	4158	5037	5	NA	NA	NA	no_plot	68895	Cupriavidus basilensis	TRUE	NA	NA	68895	Cupriavidus basilensis	106589	Cupriavidus	119060	Burkholderiaceae	80840	Burkholderiales	28216	Betaproteobacteria	1224	Proteobacteria	2	Bacteria	131567	cellular organisms
214	NZ_CP010537.1[89911..105132]	Cupriavidus basilensis	68895	acyl-CoA dehydrogenase family protein_1	acyl-CoA dehydrogenase family protein	acyl-CoA dehydrogenase family protein	WP_043352772.1	214#WP_043352772.1#NZ_CP010537.1[89911..105132]	NA	1	1797	MQTSAARQTVVSATLSATPAHPVPDQQGVNLFASDPDLRALLPLYLPPDLFAHLLPHLDRMGALAGGVLDELAHIADQNKPTLSHRTRTGIDAQRIDKHPAYVELEKVAFSEFGLAAASHRGGVLGWDKPMPAAAKYALTYLFVQAEFGLCCPLSMTDSLTRTLRKFGDPAVVERFLPNLTTQVFEDLYQGAMFMTEQGAGSDVAATTTRAARDAQAEGGWRLSGDKWFCSNPDAALAMVLARVEDENGEAAPGIKGVSLFLLPRTLADGSANHYRIIRLKDKLGTRSMASGEIRLEGAHAYLVGELGRGFVQMADMINNSRLSNGVRAAGLMRRALSEGQFIARERRAFGKRLLDMPLMRRQLLKLALPTEQARTMVFQTAEALRRADAGEADAYALM…	0	5155	6952	6	NA	NA	NA	no_plot	68895	Cupriavidus basilensis	TRUE	NA	NA	68895	Cupriavidus basilensis	106589	Cupriavidus	119060	Burkholderiaceae	80840	Burkholderiales	28216	Betaproteobacteria	1224	Proteobacteria	2	Bacteria	131567	cellular organisms
215	NZ_CP010537.1[89911..105132]	Cupriavidus basilensis	68895	tripartite tricarboxylate transporter substrate binding protein_1	tripartite tricarboxylate transporter substrate binding protein	tripartite tricarboxylate transporter substrate binding protein	WP_043352773.1	215#WP_043352773.1#NZ_CP010537.1[89911..105132]	NA	1	981	MTLWQRLAAVAACTLCVGIAPALAQKDFPSKPIMMIVTYPPGGPTDVMARTLASALKGSLGQTVVVENRAGAGGNIGAEAVARAEPDGYTLMFGTSAPLAINVSLYRKINYDPVKSFAPIIQIGQLPNVLVVNPSVPAKTVGELIAYGKANPGKLTYASSGNGASSHLAGVLFNNLAGTDFRHIPYKGTGPALNDLLGGQVSMSFTDVLTALPFIKSGKFRVLGVTTKSRSQALPDVPTVAEQGVPGFDVSVFFGVVAPAGTPPAVIAKLNHAFADALQQPAVRKTLQAQGLELPPSTSPEQLGSFVKAEVTKWRGVVQKSGAQLD	0	7058	8039	7	tph_c	NA	NA	no_plot	68895	Cupriavidus basilensis	TRUE	NA	NA	68895	Cupriavidus basilensis	106589	Cupriavidus	119060	Burkholderiaceae	80840	Burkholderiales	28216	Betaproteobacteria	1224	Proteobacteria	2	Bacteria	131567	cellular organisms
216	NZ_CP010537.1[89911..105132]	Cupriavidus basilensis	68895	PaaI family thioesterase_1	PaaI family thioesterase	PaaI family thioesterase	WP_043352775.1	216#WP_043352775.1#NZ_CP010537.1[89911..105132]	NA	1	456	MTDLSLPAPVNEFAGEAPGLLFALPMPMARVFGLTGVHINAKEARVSMAYHPDHTNSRGDVHGGALATLLDCALSCAARGHDPRRFGVATIDLSVHFTAPGRGELTANAWCERRGRSLCFARGEIRDAQGELLALATGTFKLLDRTPAPAA	0	8219	8675	8	NA	NA	NA	no_plot	68895	Cupriavidus basilensis	TRUE	NA	NA	68895	Cupriavidus basilensis	106589	Cupriavidus	119060	Burkholderiaceae	80840	Burkholderiales	28216	Betaproteobacteria	1224	Proteobacteria	2	Bacteria	131567	cellular organisms
217	NZ_CP010537.1[89911..105132]	Cupriavidus basilensis	68895	CoA transferase_1	CoA transferase	CoA transferase	WP_043352777.1	217#WP_043352777.1#NZ_CP010537.1[89911..105132]	NA	1	1152	MSKLPVSPGALAGIRVVDLSRILGGPFCGQILGDHGADVLKIEPPQGDDTRTWGPPFKDGVASYYFGLNRNKRVMRLDLSADADREVLLALLADADVLVENFKTGTLEKWGLGFDALSARFPRLVHCRVSGFGADGPLGGLPGYDAAIQAMAGIMSINGEAGGDALRVGLPVVDMVTGLNAALGVLLALQERERSGRGQFVEAALYDSGLSLLHPHAANWFMSGKEPTRTGNAHPNIYPYDTVATATDPIFLAVGNDRQFRILCEHLEMPGFADDARYATAGARSVNRAALKVELEARMGKLDGKVLADTLVAAGVPCAPVLSVAHALQHPHTVHREMVVEMADGYKGLGSPVKLSRTPATYRYAPLAEGDQFLPRDAANDGE	0	8744	9896	9	NA	NA	NA	no_plot	68895	Cupriavidus basilensis	TRUE	NA	NA	68895	Cupriavidus basilensis	106589	Cupriavidus	119060	Burkholderiaceae	80840	Burkholderiales	28216	Betaproteobacteria	1224	Proteobacteria	2	Bacteria	131567	cellular organisms
218	NZ_CP010537.1[89911..105132]	Cupriavidus basilensis	68895	lactate permease LctP family transporter_-1	lactate permease LctP family transporter	lactate permease LctP family transporter	WP_043352779.1	218#WP_043352779.1#NZ_CP010537.1[89911..105132]	NA	-1	1743	MQPWTQTYTPLGSLWLSALAAALPILFFFLALAVLRMKGHVAAAITLLLALGVAIFAYGMPVPQALAAAGFGFAYGLWPIAWIIVTAVFLYKIVVKTGQFDIIRASVLAITDDQRLQMLLIGFAFGAFLEGAAGFGAPVAITAALLVGLGFNPLYAAGLCLIANTAPVAFGAMGIPIIVAGQVTGIDAMHIGAMAGRQLPLLSLAVPFWLVFIMDGKRGVKETWPAALVTGASFSVTQYFTSNHIGPELPDITSALVSLVSLTLFLKVWQPKSASQRAGGAVKAGGGAAALARMGGGLASDAGSFGNGAGDGAGNNRRASPYTVAQTVRAWAPFGILTAIVTVWSLPSFKALFVGNGALAGWVLKFHVPALDQLVIKAAPIVAQPKAYEAVFKLDLVSA…	0	9947	11690	10	NA	NA	NA	no_plot	68895	Cupriavidus basilensis	TRUE	NA	NA	68895	Cupriavidus basilensis	106589	Cupriavidus	119060	Burkholderiaceae	80840	Burkholderiales	28216	Betaproteobacteria	1224	Proteobacteria	2	Bacteria	131567	cellular organisms
219	NZ_CP010537.1[89911..105132]	Cupriavidus basilensis	68895	iron-sulfur cluster-binding protein_-1	iron-sulfur cluster-binding protein	iron-sulfur cluster-binding protein	WP_052494841.1	219#WP_052494841.1#NZ_CP010537.1[89911..105132]	NA	-1	1470	MSTSTTAQDSAAPLHFVPAADFKARSRAALDDPKLRSSFRGAMDFLQAKRAVQFPDGDELEQLRDLGEAIRQHALSQLPDLLVQLEDKLTAAGVQVHWAETADEANAIVHGIAQARQASRVIKGKSMASEEIELNHYLAERGIDCIESDMGEYIVQLAGEKPSHIVMPAIHKTRGDIAELFEQHIPGTPYTEDVDELIQTGRRALRQEFVNADIGLSGVNFAAADTGTLWLVENEGNGRLSTTVPDVHIAIMGMEKVVARLEHIVPLASLLTRSATGQAITTYFNLISGPRRAGERDGPREVHLVLLDNGRSQAYADEQLRATLQCIRCGACMNHCPVYTRIGGHAYGTTYPGPIGKIISPHLLGLDATADLATASSLCGACGEVCPVRIPIPQLLIRL…	0	12200	13670	11	NA	NA	NA	no_plot	68895	Cupriavidus basilensis	TRUE	NA	NA	68895	Cupriavidus basilensis	106589	Cupriavidus	119060	Burkholderiaceae	80840	Burkholderiales	28216	Betaproteobacteria	1224	Proteobacteria	2	Bacteria	131567	cellular organisms
220	NZ_CP010537.1[89911..105132]	Cupriavidus basilensis	68895	LUD domain-containing protein_-1	LUD domain-containing protein	LUD domain-containing protein	WP_043352782.1	220#WP_043352782.1#NZ_CP010537.1[89911..105132]	NA	-1	705	MSTLSARERMLGRLRAAAPATTADASQLDARIDAHYDARREAATPAELAQAMQAALGASHALAWCASAEAWPAQLAGKLAAAGVRRLLLDPAAEQGAALMRALPASVAPLSYARPIEAWKAELFDTVDAGFTVARSGIAATGTLVLAPDAQTPRTVSLVPPLHIALVYAETLHPDLHCAARAERWSAGMPTNLVLVSGPSKTSDIQQTLAYGAHGPRELWVIIVTGSAGTGAAQ	0	13666	14371	12	NA	NA	NA	no_plot	68895	Cupriavidus basilensis	TRUE	NA	NA	68895	Cupriavidus basilensis	106589	Cupriavidus	119060	Burkholderiaceae	80840	Burkholderiales	28216	Betaproteobacteria	1224	Proteobacteria	2	Bacteria	131567	cellular organisms
221	NZ_CP010537.1[89911..105132]	Cupriavidus basilensis	68895	(Fe-S)-binding protein_-1	(Fe-S)-binding protein	(Fe-S)-binding protein	WP_043352784.1	221#WP_043352784.1#NZ_CP010537.1[89911..105132]	NA	-1	789	MKQRRYPPAPAQVYLFATCLVDMFVPQAGLDAVRLLEREGLTVHFPRGQSCCGQPAYSSGNPEQARAVALAQLDLFAEPWPVIVPSGSCAGMMRHHWPQLFAQDPVAGPKAALLAERVYELSEFLLHVLKVRFDVSGVAGQPPETVVLHTSCAARREMGTRDHGVALVDALPGVTRTEHQRESECCGFGGTFSLKHPDISGAMVQDKIASACATGCDRLVSADCGCLLNIGHAARHQGAPLPVEHIASFLWRRTGGAAKEQA	0	14367	15156	13	NA	NA	NA	no_plot	68895	Cupriavidus basilensis	TRUE	NA	NA	68895	Cupriavidus basilensis	106589	Cupriavidus	119060	Burkholderiaceae	80840	Burkholderiales	28216	Betaproteobacteria	1224	Proteobacteria	2	Bacteria	131567	cellular organisms
222	NZ_CP014844.1[4367484..4382515]	Cupriavidus nantongensis	1796606	UDP-N-acetylmuramoyl-L-alanyl-D-glutamate--2, 6-diaminopimelate ligase_-1	UDP-N-acetylmuramoyl-L-alanyl-D-glutamate--2, 6-diaminopimelate ligase	UDP-N-acetylmuramoyl-L-alanyl-D-glutamate--2, 6-diaminopimelate ligase	WP_062801818.1	222#WP_062801818.1#NZ_CP014844.1[4367484..4382515]	NA	-1	779	MTAKPLLPLEVTAQASNALAWLRTNVAAAAQLSGDTRRLARGDVFFAYVLGNDRLATDGRPYIAQAIAAGAGAVVYEADGFDWPFGDAVPHLAVSRLHQLAGPIAAGWHGNPARGLAVTGITGTNGKTSCSQWLARVLQAAGTPCAAIGTLGTGFPDALQATGFTTPDAVQLQASLAALHDAGARAVAMEVSSHGLEQERVAGTHFSVAVLTNLTQDHLDYHGSMAEYEAAKARLFRWDGLRTAVVNRDDAMGQRLLAADAAAVAAPHVIEYGIDGPAAATVRGPRGAWLRATNVRATATGTAFHIDGSFGHAEMATPMIGAFNVSNLLAVLGAALANGVAWDAALAALRALAPVEGRMELFGAGAGHDAAQAPLAVVDYAHTPDALAQTLAALRPVAQ…	1	0	779	1	NA	NA	NA	no_plot	1796606	Cupriavidus nantongensis	TRUE	NA	NA	1796606	Cupriavidus nantongensis	106589	Cupriavidus	119060	Burkholderiaceae	80840	Burkholderiales	28216	Betaproteobacteria	1224	Proteobacteria	2	Bacteria	131567	cellular organisms
223	NZ_CP014844.1[4367484..4382515]	Cupriavidus nantongensis	1796606	penicillin-binding protein 2_-1	penicillin-binding protein 2	penicillin-binding protein 2	WP_062801819.1	223#WP_062801819.1#NZ_CP014844.1[4367484..4382515]	NA	-1	1806	MSMARPNPPRRDRNGTASRPRSGQFAASPVLGLRLPMWRSKLVVFLMFAAFAALAVRAAWIQGPGNQFYEAEGKKRFQRTLELPATRGKILDRNGLVLATSLPVKAIWAVPEDVPNQVEAGKIRQLARLLGMSEKDLGKKLSEDKGFVYLKRQVLPDVADKIAALKIDGIHQTREYKRFYPEGEAMAHIVGFTNVEDRGQEGVELARESGLAGRAGARQVIKDRLGRVVEDIGVLKTPRDGEDIQLSIDAKIQYLAYNELKAVVDKHKAKAASAVVLDAQTGEVLALANWPTYNPNDRTRLSGEQLRNRVLTDTFEPGSMMKPITVGLALQLKRVSPSTVIATTGKYQFEGATITDTHNYGALTVTGVIQKSSNIGTTKIAMMMKPQEMWDMYTSIGLG…	0	789	2595	2	NA	NA	NA	no_plot	1796606	Cupriavidus nantongensis	TRUE	NA	NA	1796606	Cupriavidus nantongensis	106589	Cupriavidus	119060	Burkholderiaceae	80840	Burkholderiales	28216	Betaproteobacteria	1224	Proteobacteria	2	Bacteria	131567	cellular organisms
224	NZ_CP014844.1[4367484..4382515]	Cupriavidus nantongensis	1796606	cell division protein FtsL_-1	cell division protein FtsL	cell division protein FtsL	WP_062801820.1	224#WP_062801820.1#NZ_CP014844.1[4367484..4382515]	NA	-1	312	MNRLTFFLLAALILCALSLVSAQHQARTLFVALERAQAEERQLDVDWSRLQYQQSALGKSARIAEAARAQLKMAPVNPGKTQYLSGIVLPPAPSAPASAAEAR	0	2594	2906	3	NA	NA	NA	no_plot	1796606	Cupriavidus nantongensis	TRUE	NA	NA	1796606	Cupriavidus nantongensis	106589	Cupriavidus	119060	Burkholderiaceae	80840	Burkholderiales	28216	Betaproteobacteria	1224	Proteobacteria	2	Bacteria	131567	cellular organisms
225	NZ_CP014844.1[4367484..4382515]	Cupriavidus nantongensis	1796606	16S rRNA (cytosine(1402)-N(4))-methyltransferase RsmH_-1	16S rRNA (cytosine(1402)-N(4))-methyltransferase RsmH	16S rRNA (cytosine(1402)-N(4))-methyltransferase RsmH	WP_062801821.1	225#WP_062801821.1#NZ_CP014844.1[4367484..4382515]	NA	-1	1002	MSPTGTPATPALQHRTVLLDEAVDALVWRPDGVYVDGTFGRGGHSRAVLARLGPDGALVAFDKDPAAIAEAGTIKDARFSIEHASFAAMAERLAGRGHVAGVLLDLGISSPQIDEAARGFSFRFEGPLDMRMDTTRGITAAQWLAQADEQDIARVIRDYGEERFAVQIAKAIVARRSESGDGGPVATTADLAALVAKAVKTREKGQDPATRTFQALRIHVNQELEDLERGLKAAYDLLQVGGRLVVISFHSLEDRIVKRFMAAHARPQQDADPALRRAPLRAADLPQPTLRLLGRYKPGAEEVAANPRARSAVMRVAEKLAPAAPTAGGGARA	0	2902	3904	4	NA	NA	NA	no_plot	1796606	Cupriavidus nantongensis	TRUE	NA	NA	1796606	Cupriavidus nantongensis	106589	Cupriavidus	119060	Burkholderiaceae	80840	Burkholderiales	28216	Betaproteobacteria	1224	Proteobacteria	2	Bacteria	131567	cellular organisms
226	NZ_CP014844.1[4367484..4382515]	Cupriavidus nantongensis	1796606	division/cell wall cluster transcriptional repressor MraZ_-1	division/cell wall cluster transcriptional repressor MraZ	division/cell wall cluster transcriptional repressor MraZ	WP_010814778.1	226#WP_010814778.1#NZ_CP014844.1[4367484..4382515]	NA	-1	429	MFQGASALSLDAKGRMSIPSRHREALQQQAEGRVTLTKHPDGCLLLFPRPEWETFRTRIAALPMDAHWWKRIFLGNAADVEMDGAGRVLIAPELRSAAMLDKEVMLLGMGSHFEVWDAATYAAKEQQAMAQGMPEALKNFSF	0	3911	4340	5	NA	NA	NA	no_plot	1796606	Cupriavidus nantongensis	TRUE	NA	NA	1796606	Cupriavidus nantongensis	106589	Cupriavidus	119060	Burkholderiaceae	80840	Burkholderiales	28216	Betaproteobacteria	1224	Proteobacteria	2	Bacteria	131567	cellular organisms
227	NZ_CP014844.1[4367484..4382515]	Cupriavidus nantongensis	1796606	2-polyprenyl-3-methyl-6-methoxy-1,4-benzoquinone monooxygenase_-1	2-polyprenyl-3-methyl-6-methoxy-1,4-benzoquinone monooxygenase	2-polyprenyl-3-methyl-6-methoxy-1,4-benzoquinone monooxygenase	WP_062801822.1	227#WP_062801822.1#NZ_CP014844.1[4367484..4382515]	NA	-1	624	MDTLIKEFDVALRAIAGATRSARTNPADRLAPDTEQMSAGERRHVAGLMRINHVGEVCAQALYQAQKLTARNGAVRAQMDAAAREEEDHLAWCAERLRELGSRPSLLNPLWYAGAFAIGWVAGRAGDRVSLGFVAETERQVEHHLGGHLDRLPESDGRSRAILEQMRDDEIRHGDAAREAGGMPLPAPVRALMRGASRVMTTAAYRI	0	4777	5401	6	NA	NA	NA	no_plot	1796606	Cupriavidus nantongensis	TRUE	NA	NA	1796606	Cupriavidus nantongensis	106589	Cupriavidus	119060	Burkholderiaceae	80840	Burkholderiales	28216	Betaproteobacteria	1224	Proteobacteria	2	Bacteria	131567	cellular organisms
228	NZ_CP014844.1[4367484..4382515]	Cupriavidus nantongensis	1796606	porin_1	porin	porin	WP_062801823.1	228#WP_062801823.1#NZ_CP014844.1[4367484..4382515]	NA	1	1134	MKKSLLALAALGAFAGAAQAQSSVTLYGVVDANIEYVSNMSSVTPSAANGLAVGPAENAFRLTSGGLSVSRWGLRGVEDLGSGLKALFVLESGFGIDDGRLQQGGRLFGRQAYVGLESAQAGRFTFGRQYTTLFDLMANFSPTGYATQYEPVVAQLGLNFRSDNTAKYTGKFGPVTAIAHWSFGNGVAGGGEVPGQFRRDTGYGAGLAWAAGPFGVSAAYDQYNPTLNAAGGTGEFKKAAVAASYAFGPAKLMAGYRWGMNKAPNNNTILKDNYYWVGANYQVTPALGLTLAYFYDDVKNLNLAATGTTNNIKNPWQISFVADYNLSKRTDVYLTTAYAKNAGVNFDTSAISFANGYFLGTGKDNMVGVALGIRHKF	0	5748	6882	7	NA	NA	NA	no_plot	1796606	Cupriavidus nantongensis	TRUE	NA	NA	1796606	Cupriavidus nantongensis	106589	Cupriavidus	119060	Burkholderiaceae	80840	Burkholderiales	28216	Betaproteobacteria	1224	Proteobacteria	2	Bacteria	131567	cellular organisms
229	NZ_CP014844.1[4367484..4382515]	Cupriavidus nantongensis	1796606	tripartite tricarboxylate transporter substrate binding protein_1	tripartite tricarboxylate transporter substrate binding protein	tripartite tricarboxylate transporter substrate binding protein	WP_062801824.1	229#WP_062801824.1#NZ_CP014844.1[4367484..4382515]	NA	1	1002	MQPNRRRVVALLLSVSLGALAGQPALAADPYPAKPIRLVVPFAAGGTTDILARAVAAELGKLPGWNVVVDNKPGAGGNIGADIVAKAAPDGYTLLMGTVGTHGINQSLYGKLPFDPIKDFAPITEVAAVPNVLVLNPAFAQQNKIDSVKDLIAYARANPGKINMASSGNGTSIHLAGELFKTQTRTFMVHFPYKGSGPALTDLAGGTMQVMFDNLPSSMALIKSGKLKALAVTSAKPSPALPGVPTIAQAAGLPQYEASSWFGMLAPAGTPPEVIQRVQQEVAKALGAPAVRERLQAQGAEPIGNTPEQFAAFIRAETAKWAKVVKDSGAKVD	0	7063	8065	8	tph_c	NA	NA	no_plot	1796606	Cupriavidus nantongensis	TRUE	NA	NA	1796606	Cupriavidus nantongensis	106589	Cupriavidus	119060	Burkholderiaceae	80840	Burkholderiales	28216	Betaproteobacteria	1224	Proteobacteria	2	Bacteria	131567	cellular organisms
230	NZ_CP014844.1[4367484..4382515]	Cupriavidus nantongensis	1796606	MarR family transcriptional regulator_1	MarR family transcriptional regulator	MarR family transcriptional regulator	WP_062801825.1	230#WP_062801825.1#NZ_CP014844.1[4367484..4382515]	NA	1	504	MPNLSPAAGAESAPVDLETRADHTEHEALRLWLRLLTCTNLIEADIRSRLRQDFACTLPRFDLMAQLDRHPEGLKMGELSRRMMVTGGNVTGITDQLQQEGLVSREALPTDRRAYLIRLTPAGRAAFSRMARAHEDWIGQLFSGLAETDRRALFRLLGRLKSGLISP	0	8229	8733	9	NA	NA	NA	no_plot	1796606	Cupriavidus nantongensis	TRUE	NA	NA	1796606	Cupriavidus nantongensis	106589	Cupriavidus	119060	Burkholderiaceae	80840	Burkholderiales	28216	Betaproteobacteria	1224	Proteobacteria	2	Bacteria	131567	cellular organisms
231	NZ_CP014844.1[4367484..4382515]	Cupriavidus nantongensis	1796606	hypothetical protein_1	hypothetical protein	hypothetical protein	WP_062801826.1	231#WP_062801826.1#NZ_CP014844.1[4367484..4382515]	NA	1	444	MKPLAFVTLCGVLLLAACSSTPQPPQVTPVNATIKLGRVTEKVFLTRLDVAQVPSYYGGGTSVGVGVASGGHGGGVGVGFAFDLSRLFNKPAPVQQVDLFQYKVRTLDGAMVSANAPAAPGLEPGACVRVIYPDGGQEARLAPSNEC	0	8729	9173	10	NA	NA	NA	no_plot	1796606	Cupriavidus nantongensis	TRUE	NA	NA	1796606	Cupriavidus nantongensis	106589	Cupriavidus	119060	Burkholderiaceae	80840	Burkholderiales	28216	Betaproteobacteria	1224	Proteobacteria	2	Bacteria	131567	cellular organisms
232	NZ_CP014844.1[4367484..4382515]	Cupriavidus nantongensis	1796606	long-chain fatty acid--CoA ligase_-1	long-chain fatty acid--CoA ligase	long-chain fatty acid--CoA ligase	WP_062801827.1	232#WP_062801827.1#NZ_CP014844.1[4367484..4382515]	NA	-1	1683	MERIWLKHYPAGVPAEIDASQFRSLAALLEASFHSYADRKAFICMDKAITYGELDRLSTHFAAWLQSRGLRPGARVAIMMPNVLQYPVVLAAVLRAGFVVVNVNPLYTPRELEHQLKDSGAEAIVILENFAATLQQVLPRTPVKHVVVASMGDMLGGLKGAIVNFVVRNVKKMVPAWELPNCVRFNSVLAEGRKLTLQPATTGPDDIAFLQYTGGTTGVSKGAVLLHRNVVANVLQSEAWMQPALNKGAHIDQPITITALPLYHIFALTVCCLLGMRSGGTSVLIPNPRDIPGFIKELQKYKFNMFPAVNTLYNALLNHPDIGKVDFSGLRVANGGGMAVQEAVAKQWLAKTGCPIIEGYGLSETSPSATCNPTDTDAFSGTIGMPLPSTEVVIRDDDG…	0	9249	10932	11	NA	NA	NA	no_plot	1796606	Cupriavidus nantongensis	TRUE	NA	NA	1796606	Cupriavidus nantongensis	106589	Cupriavidus	119060	Burkholderiaceae	80840	Burkholderiales	28216	Betaproteobacteria	1224	Proteobacteria	2	Bacteria	131567	cellular organisms
233	NZ_CP014844.1[4367484..4382515]	Cupriavidus nantongensis	1796606	TetR/AcrR family transcriptional regulator_-1	TetR/AcrR family transcriptional regulator	TetR/AcrR family transcriptional regulator	WP_062801828.1	233#WP_062801828.1#NZ_CP014844.1[4367484..4382515]	NA	-1	663	MSIAPRSEPLAPPSGAPTEPQPARPHIAERQEARRRQILDTAAQLFYSKGYPGMTMNDLCRALGVTKPAVYYYFTDKYEIFDILCRESAQTCLPVIRETADPAQPVTERLHACLLEMARRCIACHVPATLSFRDRQYLRPDTVAWLDSMARDFYRDLYALLDEGQREGVFAFGDARVTAHAIGSVVGFLYTWHEPGRTDPETLAQELAASMMKLVLPSGR	0	11121	11784	12	NA	NA	NA	no_plot	1796606	Cupriavidus nantongensis	TRUE	NA	NA	1796606	Cupriavidus nantongensis	106589	Cupriavidus	119060	Burkholderiaceae	80840	Burkholderiales	28216	Betaproteobacteria	1224	Proteobacteria	2	Bacteria	131567	cellular organisms
234	NZ_CP014844.1[4367484..4382515]	Cupriavidus nantongensis	1796606	aminopeptidase_-1	aminopeptidase	aminopeptidase	WP_062801829.1	234#WP_062801829.1#NZ_CP014844.1[4367484..4382515]	NA	-1	1134	MTRPRGRRGWAALVGAAALSALVLLTAGCEAVGYYAQSIGGHLGVMAQAQPLTDAIASARDANDARLAQRLALAGRMRDFASRELKLPDNGSYRRYANLHRPYVVWSVFATPELSMELRKWCFPIVGCISYRGYYAQSDAEQYAQGLRRDGLETYVAGVPAYSTLGYFDDPLLNTFVYLPEGELARLIFHELAHQVVYVRNDTAFNESFATAVEAAGVERWLDQDASEDARTSYRQYDARRQQFRALLLGTRDRLVALYQTPLDDAAKREGKAKIFADLRAGYARLRAEWGGYSGYDRWFDQPLTNAHLAAVATYQQWVPAFTALLARCDGDWQRFYDEARRIGALPAREREAALRRLAPPATRTDTLTAGAKAAAN	0	11852	12986	13	NA	NA	NA	no_plot	1796606	Cupriavidus nantongensis	TRUE	NA	NA	1796606	Cupriavidus nantongensis	106589	Cupriavidus	119060	Burkholderiaceae	80840	Burkholderiales	28216	Betaproteobacteria	1224	Proteobacteria	2	Bacteria	131567	cellular organisms
235	NZ_CP014844.1[4367484..4382515]	Cupriavidus nantongensis	1796606	molybdopterin oxidoreductase family protein_-1	molybdopterin oxidoreductase family protein	molybdopterin oxidoreductase family protein	WP_062801830.1	235#WP_062801830.1#NZ_CP014844.1[4367484..4382515]	NA	-1	2050	MASRIVRAACPHDCPDTCALLVTVEDGRAVKVAGDPDHPGTQGVLCTKVSRYTERTYHPDRLLTPMKRVGKKGEGKFTPISWDEALDIIATRLQAIAVRDPQAIVPYSYAGTMGLVQGESMAARFFNKLGASRLDRTICASAGATALRYTYGASVGMDMEHVVDARLVIIWGGNPIASNLHFWTRAQEAKRRGATLVAIDPYRSLSAEKCHRHIAPMPGTDGALALAMIHVLIRDGLLDHDYIERHTVGFEALRERAQAYPPARAAEICGIPVEDIEWLAGLYGQQAVRERQPVAIRLNYGMQRVHGGGQAVRAVACLPSLVGAWRHPAGGLQLSTSGFFPVNEAALQRPDLLPGWPQQLPRLVNMSTIGDALLAEGAPGAPRIEAVVVYNSNPVAVAP…	1	12982	15032	14	NA	NA	NA	no_plot	1796606	Cupriavidus nantongensis	TRUE	NA	NA	1796606	Cupriavidus nantongensis	106589	Cupriavidus	119060	Burkholderiaceae	80840	Burkholderiales	28216	Betaproteobacteria	1224	Proteobacteria	2	Bacteria	131567	cellular organisms
236	NZ_CP014845.1[2372251..2387456]	Cupriavidus nantongensis	1796606	hypothetical protein_1	hypothetical protein	hypothetical protein	WP_062804016.1	236#WP_062804016.1#NZ_CP014845.1[2372251..2387456]	NA	1	910	MRLRMWASWLAGSAAALLLAACGGGGGGSAPAAPASGGTTTPLTYSAKMSVTSGEVGVGRTLTISALAVDSNGVDVSGNTTFDWTSTDSAVATVTPSSGTPGSAVVRGVAPGTTTVQVAATVRGSDNTTVQLPPQSATITVVPASALSYTLSMPATSLSMSDGQELPVKVTLLDSNGSDVSASVSNWAWSSSGTAVQVTASQNSATLKASNGSPTTAATASVSVSVTAPDGHALSGVIAVTVQKNGAAAYRVVTTKGGREVNALQVFSNRPDTFSARVLRHDGQDVTADFDGSWSYTASSATLSATEAAGTHDATVRTSLAGDTGPVQGSLTVTAVSSKLGERRSATLTVTENPLWALVGDNQDPITLLLLAPTPVEVTARMKHLGEDAQFTACRDWAW…	1	0	910	1	NA	NA	NA	no_plot	1796606	Cupriavidus nantongensis	TRUE	NA	NA	1796606	Cupriavidus nantongensis	106589	Cupriavidus	119060	Burkholderiaceae	80840	Burkholderiales	28216	Betaproteobacteria	1224	Proteobacteria	2	Bacteria	131567	cellular organisms
237	NZ_CP014845.1[2372251..2387456]	Cupriavidus nantongensis	1796606	hypothetical protein_-1	hypothetical protein	hypothetical protein	WP_062804017.1	237#WP_062804017.1#NZ_CP014845.1[2372251..2387456]	NA	-1	312	MSLYHAIETLLVPLIVLACAVSVVARYAPRTRERVKAALAARLGGPAAAGWRGRLARWLAPQAAAGCASGCDDGGCNTCDANTSNSTSQDKPAEQVVRFVRKR	0	1245	1557	2	NA	NA	NA	no_plot	1796606	Cupriavidus nantongensis	TRUE	NA	NA	1796606	Cupriavidus nantongensis	106589	Cupriavidus	119060	Burkholderiaceae	80840	Burkholderiales	28216	Betaproteobacteria	1224	Proteobacteria	2	Bacteria	131567	cellular organisms
238	NZ_CP014845.1[2372251..2387456]	Cupriavidus nantongensis	1796606	ferrous iron transport protein B_-1	ferrous iron transport protein B	ferrous iron transport protein B	WP_062804018.1	238#WP_062804018.1#NZ_CP014845.1[2372251..2387456]	NA	-1	1857	MSAAASPSALRIALVGNPNCGKTALFNRLTGSRQKVANYAGVTVERKEGYFVSPAGRQVRILDLPGAYSLHAASLDEAITRDVCLGQRAGEARPDLLVSVVDATNLRLHLRFVLELRQLGLPMVVVLNMSDAAARRGIQIDRDKLSAALGVPVVSTVAVRRDGAAALVSLLDATLPPAPPAGTASGPDFDVHAEVNRLLSAAVSMPARTAALDDRIDRIVLHPVFGLLLLAVLLFLMFQAVFSWAEPLMDGIEGGVHWAGEMLGAWLPDGMLKSLLVDGLVAGLGSVVVFLPQILILFLFILTLEESGYLPRAAFLLDRLMMGAGLSGRSFIPLLSSFACAIPGIMATRTIQDPRDRLTTILVAPLMTCSARLPVYALLIGAFIPERTVMGLLNLQGLV…	0	1571	3428	3	NA	NA	NA	no_plot	1796606	Cupriavidus nantongensis	TRUE	NA	NA	1796606	Cupriavidus nantongensis	106589	Cupriavidus	119060	Burkholderiaceae	80840	Burkholderiales	28216	Betaproteobacteria	1224	Proteobacteria	2	Bacteria	131567	cellular organisms
239	NZ_CP014845.1[2372251..2387456]	Cupriavidus nantongensis	1796606	ferrous iron transport protein A_-1	ferrous iron transport protein A	ferrous iron transport protein A	WP_062804019.1	239#WP_062804019.1#NZ_CP014845.1[2372251..2387456]	NA	-1	312	MRLSELPRRTPAVVQSVDDATPGDPVARRLRELGFVAGEPVQVIAYGPFGMDPLVAQVGFTRFALRRSEAARISVEIASASVTRIAPATQGDETAPPSAKRTA	0	3443	3755	4	NA	NA	NA	no_plot	1796606	Cupriavidus nantongensis	TRUE	NA	NA	1796606	Cupriavidus nantongensis	106589	Cupriavidus	119060	Burkholderiaceae	80840	Burkholderiales	28216	Betaproteobacteria	1224	Proteobacteria	2	Bacteria	131567	cellular organisms
240	NZ_CP014845.1[2372251..2387456]	Cupriavidus nantongensis	1796606	LysR family transcriptional regulator_-1	LysR family transcriptional regulator	LysR family transcriptional regulator	WP_062804020.1	240#WP_062804020.1#NZ_CP014845.1[2372251..2387456]	NA	-1	900	MEFRHLRYFLVLAEELHYGRAARRLAISQPPLSLNIQQLEASVGARLFDRDSRGVRLTAAGRAFRESATALLAQAEAARVLAREIEAGAIGRLRVGFVGSMLYRGLPQTLREFEAGYPGIHVALTELNSQEQIDALLHDELDAAFIHTGRVPDTLQATLVHSEPFVCCLPADHALAALTELPLTSLRGEPFVLFSRKASPDYYSRIFDMCAAQGFFPQIRHEVRHWLSVVSLVSQGMGVAVVPAALARSGMAGAAFRPLADAAVRSEVYCAWKTAPDHPARDHFVTMVAAKAAQPKTQP	0	4172	5072	5	NA	NA	NA	no_plot	1796606	Cupriavidus nantongensis	TRUE	NA	NA	1796606	Cupriavidus nantongensis	106589	Cupriavidus	119060	Burkholderiaceae	80840	Burkholderiales	28216	Betaproteobacteria	1224	Proteobacteria	2	Bacteria	131567	cellular organisms
241	NZ_CP014845.1[2372251..2387456]	Cupriavidus nantongensis	1796606	acyl-CoA dehydrogenase family protein_1	acyl-CoA dehydrogenase family protein	acyl-CoA dehydrogenase family protein	WP_062804021.1	241#WP_062804021.1#NZ_CP014845.1[2372251..2387456]	NA	1	1803	MPSSAVRDIPQQPHSTQAAAAVHPVPDRQGGSLLAADPDLRALLPLYLPPDLFNHLLPHLERMGALAGGVLDELAGVADRNPPELTYRTRAGVDAQRIDKHPSYVEMERVAFAEFGLAAASHRGGVLGWDKPMPPAAKYALTYLFVQAEFGLCCPLSMTDSLTRTLRKFGDPALVERFLPNLTTQVFDDLYQGAMFMTEQGAGSDVAATATRAVRDASAEGGWRLHGDKWFCSNPDAALAMVLARVEDEAGNAVPGHKGVSLFLLPRQLEDGSANHYRIIRLKDKLGTRSMASGEIRLEGAHAYLVGEPGRGFVQMADMINNSRLSNGVRAAGLMRRALTEGLFIARERQAFGKRLQDMPLMRRQLLKLTLPTEQARTMVFQTAEALRRADAGEPDAYA…	0	5190	6993	6	NA	NA	NA	no_plot	1796606	Cupriavidus nantongensis	TRUE	NA	NA	1796606	Cupriavidus nantongensis	106589	Cupriavidus	119060	Burkholderiaceae	80840	Burkholderiales	28216	Betaproteobacteria	1224	Proteobacteria	2	Bacteria	131567	cellular organisms
242	NZ_CP014845.1[2372251..2387456]	Cupriavidus nantongensis	1796606	tripartite tricarboxylate transporter substrate binding protein_1	tripartite tricarboxylate transporter substrate binding protein	tripartite tricarboxylate transporter substrate binding protein	WP_062804022.1	242#WP_062804022.1#NZ_CP014845.1[2372251..2387456]	NA	1	975	MKLWHRVAAIAACSLFIAPAFAQKDFPSKPIMMVVTYPPGGPTDAMARTLAAALKTSLGQPVVVENRAGAGGNIGAEVVARAEPDGYTLMFGTSAPLAINVSLYRKINYDPVKSFTPVIQIGQLPNVLVVNPSVPAKNVNELIAYGKANPGKLTYASSGNGASSHLAGVLFNNVTGTDFQHIPYKGTGPALNDLLGGQVSMTFTDVLTAMPFIKSGKVRALGVTTKARSQALPDVPTVAEQGVPGFDVSVFFGVVAPAGTPAEVVGKLNRAFADALKQPDVRKTLQAQGLEFAPSTTPEQLGSFVKAEVGKWRAVVQKSGAQLD	0	7119	8094	7	tph_c	NA	NA	no_plot	1796606	Cupriavidus nantongensis	TRUE	NA	NA	1796606	Cupriavidus nantongensis	106589	Cupriavidus	119060	Burkholderiaceae	80840	Burkholderiales	28216	Betaproteobacteria	1224	Proteobacteria	2	Bacteria	131567	cellular organisms
243	NZ_CP014845.1[2372251..2387456]	Cupriavidus nantongensis	1796606	CoA transferase_1	CoA transferase	CoA transferase	WP_062804023.1	243#WP_062804023.1#NZ_CP014845.1[2372251..2387456]	NA	1	1122	MTPSSPGALAGIRVVDLSRILGGPYCGQILGDHGADVLKIEPPQGDDTRTWGPPFRDGVASYYFGLNRNKRVMHLDLAAPAGREVLLALLAEADVLVENFKTGTMEKWGLGYEALSARFPRLVHCRVSGYGADGPLGGLPGYDAAIQAMSGIMSINGDADGDALRVGLPVVDMVTGLNAAIGVLLALQERMRSGRGQFVEAALYDSGLSLLHPHAANWFMSGKTPQRTGNAHPNIYPYDTVATATDPVFLAVGNDRQFRILCEHLQVPALADDERYASAGARSVNRVALKAELEARMRALDGKALADALVAAGVPCAPVLSVADALQHPHTRHREMVVEMEGGYQGLGAPVKLSRTPATYRYAPLTPGNDFLE	0	8108	9230	8	NA	NA	NA	no_plot	1796606	Cupriavidus nantongensis	TRUE	NA	NA	1796606	Cupriavidus nantongensis	106589	Cupriavidus	119060	Burkholderiaceae	80840	Burkholderiales	28216	Betaproteobacteria	1224	Proteobacteria	2	Bacteria	131567	cellular organisms
244	NZ_CP014845.1[2372251..2387456]	Cupriavidus nantongensis	1796606	lactate permease LctP family transporter_-1	lactate permease LctP family transporter	lactate permease LctP family transporter	WP_062804024.1	244#WP_062804024.1#NZ_CP014845.1[2372251..2387456]	NA	-1	1722	MQPWTQLYTPLGSLWLSSLAAAIPIVFFFIALAVWRMKGHVAAAVTLLLALAVAIFAYGMPAQQALASAGFGFAYGLWPIAWIIVTAVFLYKIVVRTGQFDVIRASVLSITDDQRLQMLLIGFAFGAFLEGAAGFGAPVAITAALLVGLGFNPLYAAGLCLIANTAPVAFGAMGIPIIVAGQVTGLDPFHIGAMAGRQLPLLSLLVPFWLVFMMDGAKGVRETWPAALVCGGSFAVTQYFTSNHIGPELPDITSALVSLVSLAAFLKVWQPRSASQRAGGRAGNVSGGTVALAGFGGGIGGGIGGAMQSRKASPYTLAQTLRAWAPFGILTAIVTVWSLQPFKALFAANGPLAGTVLKFKIPALDQLVIKAAPIVATPKAYDAVLKIDLLSAVGTAILL…	0	9257	10979	9	NA	NA	NA	no_plot	1796606	Cupriavidus nantongensis	TRUE	NA	NA	1796606	Cupriavidus nantongensis	106589	Cupriavidus	119060	Burkholderiaceae	80840	Burkholderiales	28216	Betaproteobacteria	1224	Proteobacteria	2	Bacteria	131567	cellular organisms
245	NZ_CP014845.1[2372251..2387456]	Cupriavidus nantongensis	1796606	iron-sulfur cluster-binding protein_-1	iron-sulfur cluster-binding protein	iron-sulfur cluster-binding protein	WP_062804025.1	245#WP_062804025.1#NZ_CP014845.1[2372251..2387456]	NA	-1	1446	MSQQTLQFVAPQDFKARAREALDDPKLRQSFRGAMDFLQGKRLAQFPDADELERLRDLGEAVRQHALANLPDLLVQLEQKLSAAGVQVHWAETADEANAIIHGIASARQATRVIKGKSMASEEIELNHYLAERGVDCIESDMGEYIVQLAGEKPSHIVMPAIHKTKGDIAQLFTEHIPDTPYTEDVDALIQTGRRALRQAFVEADIGLSGVNFAAADTGTLWLVENEGNGRLSTTVPDVHIAIMGMEKVVARLEHIVPLSTLLTRSATGQAITTYFNLISGPRRAGERDGPREVHLVLLDNGRTQAYADAQLRATLQCIRCGACMNHCPVYTRIGGHAYGTTYPGPIGKIISPHLLGLDATADLATASSLCGACGEVCPVRIPIPQLLVRLRTEANRDP…	0	11246	12692	10	NA	NA	NA	no_plot	1796606	Cupriavidus nantongensis	TRUE	NA	NA	1796606	Cupriavidus nantongensis	106589	Cupriavidus	119060	Burkholderiaceae	80840	Burkholderiales	28216	Betaproteobacteria	1224	Proteobacteria	2	Bacteria	131567	cellular organisms
246	NZ_CP014845.1[2372251..2387456]	Cupriavidus nantongensis	1796606	LUD domain-containing protein_-1	LUD domain-containing protein	LUD domain-containing protein	WP_062804026.1	246#WP_062804026.1#NZ_CP014845.1[2372251..2387456]	NA	-1	699	MSTPGARERMLGRLRAAAPVPSPQTTELDRRIDGHFEARRHGTPTTGARVAAMQAALQGLHAEVWCADASAWPAMLAAELARARVKRLLLDPATAAGAALAAALPAGIEAIGYDRPIEAWKAELFDTVDAGFTVARSGIAATGTLVLAPDAGSPRTVSLVPPLHVALVRASTLHDDLHMAARAERWADGMPTNLVLVSGPSKTSDIQQTLAYGAHGPRRLWVVIETDTAEGA	0	12691	13390	11	NA	NA	NA	no_plot	1796606	Cupriavidus nantongensis	TRUE	NA	NA	1796606	Cupriavidus nantongensis	106589	Cupriavidus	119060	Burkholderiaceae	80840	Burkholderiales	28216	Betaproteobacteria	1224	Proteobacteria	2	Bacteria	131567	cellular organisms
247	NZ_CP014845.1[2372251..2387456]	Cupriavidus nantongensis	1796606	(Fe-S)-binding protein_-1	(Fe-S)-binding protein	(Fe-S)-binding protein	WP_062804027.1	247#WP_062804027.1#NZ_CP014845.1[2372251..2387456]	NA	-1	783	MKDRQYPSGPAPTQAYLFATCLVDMFVPQAGLDAVRLLEREGLTVHFPRGQSCCGQPAYSSGNPDAARAVARAQLDLFGQPWPVIVPSGSCAGMMRHHWPQLFADDPVAGPKARELAERVYELGEFLLHVLQVDFGAAAPSAQPPERIVLHTSCGARREMGTRQHGVALVDALPGVTRVEHARESECCGFGGTFSLKHPDISGAMVRDKVASACATGCDRLVSADCGCLLNIGHTAAHDRAPLQVEHLASFLWRRSGGAA	0	13386	14169	12	NA	NA	NA	no_plot	1796606	Cupriavidus nantongensis	TRUE	NA	NA	1796606	Cupriavidus nantongensis	106589	Cupriavidus	119060	Burkholderiaceae	80840	Burkholderiales	28216	Betaproteobacteria	1224	Proteobacteria	2	Bacteria	131567	cellular organisms
248	NZ_CP014845.1[2372251..2387456]	Cupriavidus nantongensis	1796606	FCD domain-containing protein_1	FCD domain-containing protein	FCD domain-containing protein	WP_174549339.1	248#WP_174549339.1#NZ_CP014845.1[2372251..2387456]	NA	1	723	MTAARHGHTTRGRVESVMRRMETALLDGTWPPGTRLPAERVLAEQYAVARNTVREAIQRLAARGLLQSRRGAGVYATDQLRAGIASPWGQLVADHPALREDILEFRRVLEGATAYFAALRADAADVRRIRALMAELERARATDDKQAEADADAQLHDAIAQASHNTMFLHLHTSVIGMLREHITMNGTGLREQDDGASDLLLLQHRTLCDAICARRPEEARTAMQTHIDFVRSRVEHDGA	0	14294	15017	13	NA	NA	NA	no_plot	1796606	Cupriavidus nantongensis	TRUE	NA	NA	1796606	Cupriavidus nantongensis	106589	Cupriavidus	119060	Burkholderiaceae	80840	Burkholderiales	28216	Betaproteobacteria	1224	Proteobacteria	2	Bacteria	131567	cellular organisms
249	NZ_CP014845.1[2372251..2387456]	Cupriavidus nantongensis	1796606	hypothetical protein_-1	hypothetical protein	hypothetical protein	WP_062804028.1	249#WP_062804028.1#NZ_CP014845.1[2372251..2387456]	NA	-1	128	MKEPEPTVTPRLPPAAWYSVGTVAYLLTALALWTVLHANLVAALLSGLLLYSLVDVLAPRLKRLHQRHDALAVAILSALILLGLTLAGWLLVRFVSGEGNTLDGLLNHVADIIDRSRGQLPPWVSDALPNGVDELANTLIDTLREHAATAQKLGAEVLRTLVHILIGLVIGAMVALYRAVARPNRRPLAAALVARARTLQQAFSQFIFAQIQISAINTVLTSIYLLLVLPLFDVHLPLSKTLVVITFVAGLLPVLGNLISNTAIVVASLSVSLPIAVGSLVFLVVIHKLEYFLNARIIGARIQAAAWELLMVMLLMETLYGIPGVIAGPIFYAYLKRELAGAGLI	1	15078	15206	14	NA	NA	NA	no_plot	1796606	Cupriavidus nantongensis	TRUE	NA	NA	1796606	Cupriavidus nantongensis	106589	Cupriavidus	119060	Burkholderiaceae	80840	Burkholderiales	28216	Betaproteobacteria	1224	Proteobacteria	2	Bacteria	131567	cellular organisms
250	NZ_CP016278.1[2770467..2785501]	Diaphorobacter polyhydroxybutyrativorans	1546149	branched-chain amino acid ABC transporter permease_1	branched-chain amino acid ABC transporter permease	branched-chain amino acid ABC transporter permease	WP_012655498.1	250#WP_012655498.1#NZ_CP016278.1[2770467..2785501]	NA	1	761	MAFFLETLIGGLMAGMLYALVALGFVLIFKASGVFNFAQGAMVLFAALAMARFAEWIPEWTGISNPIVANLAAFLIAGLCMFAVAWFIERLVLRHLVNQEGATLLMATLGITYFLEGLGQTFFGSDIYKIDIGMPKDPVFLLDTVFEGGVLVNKEDVIAAGIAAALVVVLSIFFQKTKTGRALRAVADDHQAAQSIGIPLNHIWVIVWCVAGVVALVAGMIWGSKLGVQFSLTTVALRALPVVILGGLTSVPGAIIGGLIIGVGEKLSEVYLGPFVGGGIEIWFAYVLALVFLLFRPQGLFGEKIIDRV	1	0	761	1	NA	NA	NA	no_plot	1546149	Diaphorobacter polyhydroxybutyrativorans	TRUE	NA	NA	1546149	Diaphorobacter polyhydroxybutyrativorans	238749	Diaphorobacter	80864	Comamonadaceae	80840	Burkholderiales	28216	Betaproteobacteria	1224	Proteobacteria	2	Bacteria	131567	cellular organisms
251	NZ_CP016278.1[2770467..2785501]	Diaphorobacter polyhydroxybutyrativorans	1546149	branched-chain amino acid ABC transporter permease_1	branched-chain amino acid ABC transporter permease	branched-chain amino acid ABC transporter permease	WP_012655497.1	251#WP_012655497.1#NZ_CP016278.1[2770467..2785501]	NA	1	1077	MFYRENGQFKTTYKADQQIFPITQDRIAILLLLAVAFVAVPAMASDYFYRAILIPLVIMSMAALGVNILVGYCGQISLGSGAFMAVGAYGAFNFFVRFPGMPLVPALILGGLCATFFGILFGLPSLRVKGLYLAVATLAAQFFSDWMFLRIKWFTNNSDSGSVSVSNLQVFGMPLDSAMAKYLFCLTLLVVVALLAKNLVRGAIGREWMAIRDMDVAAAVIGIRPMYAKLSAFAVSSFIVGMAGALWAFVHLGSWEPAAFSVEVSFRLLFMVIIGGMGSIMGAFFGAAFIVVLPIFLNQFLPAVAGLFGVDISTAAVSHAELMIFGALIVWFLIVEPHGLAKLWSIGKQKMRVWPFPH	0	879	1956	2	NA	NA	NA	no_plot	1546149	Diaphorobacter polyhydroxybutyrativorans	TRUE	NA	NA	1546149	Diaphorobacter polyhydroxybutyrativorans	238749	Diaphorobacter	80864	Comamonadaceae	80840	Burkholderiales	28216	Betaproteobacteria	1224	Proteobacteria	2	Bacteria	131567	cellular organisms
252	NZ_CP016278.1[2770467..2785501]	Diaphorobacter polyhydroxybutyrativorans	1546149	ABC transporter substrate-binding protein_1	ABC transporter substrate-binding protein	ABC transporter substrate-binding protein	WP_012655496.1	252#WP_012655496.1#NZ_CP016278.1[2770467..2785501]	NA	1	1326	MKFTRLAAAATVACTLAGFAGGAAAQAKEQFFPLLSYRTGPYAPNGVPWANGKQDYIKMINARDGGVNGVKLTWEECETGYATDRGVECYERLKSRPGVTLFDPQATGITFALTEKAPVDKIPLMTLGYGLSVAQDGMAFKWNFPYMGSYWTGADILIQHIGKNAGGLDKLKGKKIALVYHDSPFGKEPIPLLQERSKMHGFELQMLPVTAPGVEQKATWLQVRQSRPDYVLLWGWGVMNSTALKEAQATGYPRDKMYGVWWAGAEPDVRDVGDGAKGYHALALNGHGTQSKVMQDILKHVHGANQGTGPKDEVGSVLYTRGVIIQMLGVEAVRRAQERFGKGKVMTGEQVRWGMENLALDQKKLDALGFTDLMRPLSTSCADHMGSTWARVHTWDGKQ…	0	2032	3358	3	NA	NA	NA	no_plot	1546149	Diaphorobacter polyhydroxybutyrativorans	TRUE	NA	NA	1546149	Diaphorobacter polyhydroxybutyrativorans	238749	Diaphorobacter	80864	Comamonadaceae	80840	Burkholderiales	28216	Betaproteobacteria	1224	Proteobacteria	2	Bacteria	131567	cellular organisms
253	NZ_CP016278.1[2770467..2785501]	Diaphorobacter polyhydroxybutyrativorans	1546149	ABC transporter ATP-binding protein_1	ABC transporter ATP-binding protein	ABC transporter ATP-binding protein	WP_012655495.1	253#WP_012655495.1#NZ_CP016278.1[2770467..2785501]	NA	1	810	MESRNIVLSVNGIEVIYNHVILVLKGVSLQLPEKGIVALLGGNGAGKTTTLRAISNLLKGERGEVTKGSIELRGEQIQNLSPADLVKRGVVQVMEGRHCFAHLTIEENLLTGSYTRTDKGEIAANLEKVYNYFPRLKTRRTSQAAYTSGGEQQMCAIGRAIMSNPNIVLLDEPSMGLAPQIVEEVFNIVKDLNAKEGTTFLLAEQNTNMALKYADYGYIMESGRIVMDGAAQDLASNEDVKEFYLGVGGGERKSFKDVKSYKRRKRWLA	0	3554	4364	4	NA	NA	NA	no_plot	1546149	Diaphorobacter polyhydroxybutyrativorans	TRUE	NA	NA	1546149	Diaphorobacter polyhydroxybutyrativorans	238749	Diaphorobacter	80864	Comamonadaceae	80840	Burkholderiales	28216	Betaproteobacteria	1224	Proteobacteria	2	Bacteria	131567	cellular organisms
254	NZ_CP016278.1[2770467..2785501]	Diaphorobacter polyhydroxybutyrativorans	1546149	AMP-binding protein_1	AMP-binding protein	AMP-binding protein	WP_088887750.1	254#WP_088887750.1#NZ_CP016278.1[2770467..2785501]	NA	1	1248	MSMFYDALETRAPAEREAALMAALPRQIAHAQQASPAFAGILEGVDATTITDRAALARLPVTRKYELLERQQAQRGQNAFGGFSALAFGRHMPRVFASPGTIYEPEGARPDYWRMARAMYAAGFRPGELIHNSFSYHFVPAGSMMETGAHALGCTVFPGGTGQTEQQVQAMAELRPAGYIGTPSFLKIILDKAHEHGVALPSVTKALVSGEAFPPSLRDWLAARGVTGYQCYATADLGLIAYETSAREGLVLDEGVIVEIVRPGTGDPVPEGEVGELVITTLNPDYPLIRFGTGDLSAVLPGQCPTGRTNTRIKGWMGRADQTTKVRGMFVHPGQIASVVKRFPQVQRARLVVSGEMANDQMVLQVETTETAAGMAQQLAEALREVTKLRGDVQMVPPG…	0	4456	5704	5	NA	NA	NA	no_plot	1546149	Diaphorobacter polyhydroxybutyrativorans	TRUE	NA	NA	1546149	Diaphorobacter polyhydroxybutyrativorans	238749	Diaphorobacter	80864	Comamonadaceae	80840	Burkholderiales	28216	Betaproteobacteria	1224	Proteobacteria	2	Bacteria	131567	cellular organisms
255	NZ_CP016278.1[2770467..2785501]	Diaphorobacter polyhydroxybutyrativorans	1546149	hypothetical protein_1	hypothetical protein	hypothetical protein	WP_011803923.1	255#WP_011803923.1#NZ_CP016278.1[2770467..2785501]	NA	1	990	MRTTFKIAVGAAAILAAFGASAQAYPVKDKNITIVVPFSAGGPTDRVARDLAEALRKPLGGATVVVENAAGAGSTIGAAKVARAQPDGYTLLLNHIGMATIPTLYRKLSFNVLNDFEFLGIVNDVPMTIISRPTLEAKNYKELATWIAQNKEKVNLGHSGLGSAGHLCGLMFQHALQSHMTPVAYKGAAPAITDLIGGQIDLMCDQTTNTTTQIEGKKVKAFAVTTNQRLTMPSLKDLPTLQESGLKDFNVSVWHGLYAPKGTPAAVLTRINEALQVAVKDPDFIKKQEGLGAVVVADKRVLPAEHKKFVQSEIEKWGMVIKAAGTYAD	0	5895	6885	6	NA	NA	NA	no_plot	1546149	Diaphorobacter polyhydroxybutyrativorans	TRUE	NA	NA	1546149	Diaphorobacter polyhydroxybutyrativorans	238749	Diaphorobacter	80864	Comamonadaceae	80840	Burkholderiales	28216	Betaproteobacteria	1224	Proteobacteria	2	Bacteria	131567	cellular organisms
256	NZ_CP016278.1[2770467..2785501]	Diaphorobacter polyhydroxybutyrativorans	1546149	tripartite tricarboxylate transporter substrate binding protein_1	tripartite tricarboxylate transporter substrate binding protein	tripartite tricarboxylate transporter substrate binding protein	WP_012655492.1	256#WP_012655492.1#NZ_CP016278.1[2770467..2785501]	NA	1	1038	MPHTSTPRRTPPRRQALHAIGALLALGLGATGAAYAQASPWPAKPVRIVVPFAAGGTTDILARAIAPELGKAFGQQFIVDNRGGAGGNIGAELVARSAPDGYTLLMGTVGTHGINRALYKQLPYDPIKDFAPVTLVASVPNVMVMNTEKARSLGINTVQDFIRYAQANPGKLNMASSGNGTSIHLAGELFKSMTGTYMLHMPYRGSAPALLDMVGGNMDVMFDNLPSSMAHIKGGKLKALAVTSAKRSTALPDVPTVEEAGGPALKGFEASSWFGLLAPAGTPADIVQRVQQEVAKALATPAVKERLLSQGAIPGGNTSAEFASLIDREHRKWAQVVKASGAKVD	0	7050	8088	7	tph_c	NA	NA	no_plot	1546149	Diaphorobacter polyhydroxybutyrativorans	TRUE	NA	NA	1546149	Diaphorobacter polyhydroxybutyrativorans	238749	Diaphorobacter	80864	Comamonadaceae	80840	Burkholderiales	28216	Betaproteobacteria	1224	Proteobacteria	2	Bacteria	131567	cellular organisms
257	NZ_CP016278.1[2770467..2785501]	Diaphorobacter polyhydroxybutyrativorans	1546149	DUF1840 domain-containing protein_-1	DUF1840 domain-containing protein	DUF1840 domain-containing protein	WP_011803921.1	257#WP_011803921.1#NZ_CP016278.1[2770467..2785501]	NA	-1	324	MLFKFKSRATADVIMLEPNGKQLLEIIGKSPNEPHGIITAAQIPAAIRALEEAVAVEEAAAAATAPDEDDQTEEEAPRGDGVRLRQRAAPFIDMLRRSAAEDCDVVW	0	8125	8449	8	NA	NA	NA	no_plot	1546149	Diaphorobacter polyhydroxybutyrativorans	TRUE	NA	NA	1546149	Diaphorobacter polyhydroxybutyrativorans	238749	Diaphorobacter	80864	Comamonadaceae	80840	Burkholderiales	28216	Betaproteobacteria	1224	Proteobacteria	2	Bacteria	131567	cellular organisms
258	NZ_CP016278.1[2770467..2785501]	Diaphorobacter polyhydroxybutyrativorans	1546149	class I SAM-dependent methyltransferase_-1	class I SAM-dependent methyltransferase	class I SAM-dependent methyltransferase	WP_088888618.1	258#WP_088888618.1#NZ_CP016278.1[2770467..2785501]	NA	-1	1284	MKHLLHSLEASLALSPVGVAVELPDGARLGDANADLRLRFRDRMAVVALAMGEIGNVGAAIVEGRVALEGSMRQLMTAAAALLKLNPTHEGPATGWQRVLLRARSMAAHTLSHDARNIQFHYDLSDDFYALWLDPRRVYSCAYYRTPDMSLAQAQEAKLDHICRKLLLRPGDRFLDIGAGWGGLLLWAAQEYGVHATGITLSRNQHAHVQRLIEERGLQGRVRMQLLDYRELQVEQPFDKIASVGMFEHVGRSQMERYFATVHRLLRPGGLLLNHGITSGGLDNPRLGAGLGDFIERYIFPGGELLHVSTVLHDMARAGLEMVDTENLRPHYARTLWAWSDALEARQDQARSVLVAQHGKERGEKALRAYRLYLAGCALAFERGWTALHQMLAVRPTGH…	0	8469	9753	9	NA	NA	NA	no_plot	1546149	Diaphorobacter polyhydroxybutyrativorans	TRUE	NA	NA	1546149	Diaphorobacter polyhydroxybutyrativorans	238749	Diaphorobacter	80864	Comamonadaceae	80840	Burkholderiales	28216	Betaproteobacteria	1224	Proteobacteria	2	Bacteria	131567	cellular organisms
259	NZ_CP016278.1[2770467..2785501]	Diaphorobacter polyhydroxybutyrativorans	1546149	hypothetical protein_1	hypothetical protein	hypothetical protein	WP_012655490.1	259#WP_012655490.1#NZ_CP016278.1[2770467..2785501]	NA	1	171	MGNKIVTEADRKRTPRPTPMPGMAVTTHGRGQRVSLERGVATRSKKNPGKRSNKGG	0	10041	10212	10	NA	NA	NA	no_plot	1546149	Diaphorobacter polyhydroxybutyrativorans	TRUE	NA	NA	1546149	Diaphorobacter polyhydroxybutyrativorans	238749	Diaphorobacter	80864	Comamonadaceae	80840	Burkholderiales	28216	Betaproteobacteria	1224	Proteobacteria	2	Bacteria	131567	cellular organisms
260	NZ_CP016278.1[2770467..2785501]	Diaphorobacter polyhydroxybutyrativorans	1546149	hypothetical protein_1	hypothetical protein	hypothetical protein	WP_088887751.1	260#WP_088887751.1#NZ_CP016278.1[2770467..2785501]	NA	1	618	MGGTARRPCRTIAAFPLPEGPMLQTPAPLSPEDAAALYQALRAEGMADALTTLHIGGAHTRLLSGAADAPALLRTLDIGARVTATTCFAHQPPTEAEMEHAIMLVEDAVMPVRDLLAPGSTLYTADGGIRQIALAAGLPAQPELRLPLEAVEHTFNRLAALSLGRPTTQDTLAQDNAFAATLLILRECLHHLGFDYIVVRSDAVV	0	10264	10882	11	NA	NA	NA	no_plot	1546149	Diaphorobacter polyhydroxybutyrativorans	TRUE	NA	NA	1546149	Diaphorobacter polyhydroxybutyrativorans	238749	Diaphorobacter	80864	Comamonadaceae	80840	Burkholderiales	28216	Betaproteobacteria	1224	Proteobacteria	2	Bacteria	131567	cellular organisms
261	NZ_CP016278.1[2770467..2785501]	Diaphorobacter polyhydroxybutyrativorans	1546149	DNA-3-methyladenine glycosylase I_-1	DNA-3-methyladenine glycosylase I	DNA-3-methyladenine glycosylase I	WP_088887752.1	261#WP_088887752.1#NZ_CP016278.1[2770467..2785501]	NA	-1	672	MLETTEPSSPDEASGLFIDEGGHARCFWCRASPLYRHYHDHEWGFPVTDERRLFEKLCLEGFQAGLSWITILNKREAFRAALAQFEAEPLADFGAAEVDQLMGNAGIVRHRGKIESAINNARRVLELRREFGSLAHYVWRYAPLAAQQRPERMTLPAVRAMTTSAASVALSKDLKKRGFSFVGPTTMYAFMQAMGLVNDHLEGCGARAAAEAARAAFTPPAAG	0	10951	11623	12	NA	NA	NA	no_plot	1546149	Diaphorobacter polyhydroxybutyrativorans	TRUE	NA	NA	1546149	Diaphorobacter polyhydroxybutyrativorans	238749	Diaphorobacter	80864	Comamonadaceae	80840	Burkholderiales	28216	Betaproteobacteria	1224	Proteobacteria	2	Bacteria	131567	cellular organisms
262	NZ_CP016278.1[2770467..2785501]	Diaphorobacter polyhydroxybutyrativorans	1546149	aminopeptidase_1	aminopeptidase	aminopeptidase	WP_088887753.1	262#WP_088887753.1#NZ_CP016278.1[2770467..2785501]	NA	1	1146	MSTSTPSPRRPWPLLAAALLLGGCAQSGGTLGYYWQSLRGHLEIMNAARPVQEWITHPDTSAPLRERLQLAQRARAFAVDELALPDNASYRRYARLDRTAAVWNVVAAGPYSLTLHRWCFPITGCIGYRGYFDEPGARAEAARLAATGLEVSVYGVPAYSTLGYSNWMGGDPLLSTFIGWPEGDFVRLLLHELAHQVAYAEGDTAFNESYATAVERLGVQRWLQQHATPATRAQFAASEERRAQWRALTQATRQRLAEIYASNGAVAPDHQALSAMKKEAMQDFRAAYATLRARWLAAHVPEAQLAALDRWVRDANNASFAAQAAYDEGVPAFMALFEREGRDWPRFHAAVRALAQAPQAERTAALQALAPQPPRVAHGGG	0	11697	12843	13	NA	NA	NA	no_plot	1546149	Diaphorobacter polyhydroxybutyrativorans	TRUE	NA	NA	1546149	Diaphorobacter polyhydroxybutyrativorans	238749	Diaphorobacter	80864	Comamonadaceae	80840	Burkholderiales	28216	Betaproteobacteria	1224	Proteobacteria	2	Bacteria	131567	cellular organisms
263	NZ_CP016278.1[2770467..2785501]	Diaphorobacter polyhydroxybutyrativorans	1546149	acyl-CoA-binding protein_-1	acyl-CoA-binding protein	acyl-CoA-binding protein	WP_088887754.1	263#WP_088887754.1#NZ_CP016278.1[2770467..2785501]	NA	-1	258	MSDLNATFEAAVANSKNLSERPDNPTLLKIYALYKQATAGDNAEKKPSFSDIVGRAKWDAWEKLKGTSSDEAKQQYIDLIESLRG	0	12927	13185	14	NA	NA	NA	no_plot	1546149	Diaphorobacter polyhydroxybutyrativorans	TRUE	NA	NA	1546149	Diaphorobacter polyhydroxybutyrativorans	238749	Diaphorobacter	80864	Comamonadaceae	80840	Burkholderiales	28216	Betaproteobacteria	1224	Proteobacteria	2	Bacteria	131567	cellular organisms
264	NZ_CP016278.1[2770467..2785501]	Diaphorobacter polyhydroxybutyrativorans	1546149	DUF2817 domain-containing protein_-1	DUF2817 domain-containing protein	DUF2817 domain-containing protein	WP_088887755.1	264#WP_088887755.1#NZ_CP016278.1[2770467..2785501]	NA	-1	1101	MIGIPQAFAASYAQARAQFVGAAAVAGLTLQPQVHPLCGPNGETLALDVVREGPLDAPRLLIVSSGCHGVEGLCGSGVQVFALQDGEWRAKARAQRVAVLYLHALNPYGFAHLRRVTHENVDLNRNFVDFSQPLPANPAYSALHPVLLPPEWPPSEANTQALLGLLNAHGLQALQAAITRGQYQHPDGLYFGGTAPTWSNCTLRAVLRREGARAERIAWVDLHTGLGPSGHGERIHAGRDEAQALARARRWWDGGGATPVTSTEDGSSSSAPLTGLMCHSAYDECPQAEVTALTLEFGTQPAPAVLQALRADHWLHRHPEASPALAARVHAQMREAFYTDTDAWKGQVISQARQVLFQAVDGLCMA	0	13269	14370	15	NA	NA	NA	no_plot	1546149	Diaphorobacter polyhydroxybutyrativorans	TRUE	NA	NA	1546149	Diaphorobacter polyhydroxybutyrativorans	238749	Diaphorobacter	80864	Comamonadaceae	80840	Burkholderiales	28216	Betaproteobacteria	1224	Proteobacteria	2	Bacteria	131567	cellular organisms
265	NZ_CP016278.1[2770467..2785501]	Diaphorobacter polyhydroxybutyrativorans	1546149	amidohydrolase_-1	amidohydrolase	amidohydrolase	WP_088887756.1	265#WP_088887756.1#NZ_CP016278.1[2770467..2785501]	NA	-1	563	MNIIESIAREAAAIAEVRRDIHAHPELCFQEVRTADVIAAKLTEWGIPIHRGLGTTGVVGIVHGRDGGACGRAVGLRADIDALPMQEFNTFAHASKHQGRMHACGHDGHTAMLLAAAQYFSKHRDFDGTVYLIFQPAEEGGGGAREMIKDGLFEQFPMQAVFGMHNWPGMPAGSFAVSPGPVMASSNEFKITIRGKGSHGAMPHMGIDPVPVACQMVQAFQNIISRNKKPIEAGVISVTMIHAGEATNVVPDSCELQGTVRTFSTELLDMIERRMRQVAEHTCAAFEARCEFEFVRNYPPTINSPAEAEFARQVMVGIVGEDKVLAQEPTGGAEDFSFMLQAKPGAYVFIANGDGDHRAMGHGGGPCTLHNPSYDFNDALIPLGGTYWVELARQWLAQP…	1	14472	15035	16	NA	NA	NA	no_plot	1546149	Diaphorobacter polyhydroxybutyrativorans	TRUE	NA	NA	1546149	Diaphorobacter polyhydroxybutyrativorans	238749	Diaphorobacter	80864	Comamonadaceae	80840	Burkholderiales	28216	Betaproteobacteria	1224	Proteobacteria	2	Bacteria	131567	cellular organisms
266	NZ_CP016278.1[3929527..3944547]	Diaphorobacter polyhydroxybutyrativorans	1546149	cytochrome c4_1	cytochrome c4	cytochrome c4	WP_088888398.1	266#WP_088888398.1#NZ_CP016278.1[3929527..3944547]	NA	1	309	MKKTLTTIFGLSVACATGFLHAEEIKGDAKAGAQKIAMCIGCHGIPGYQASFPEVHKVPMISGQGAKYIASALDAYKKGDRKHPTMRGIADSLSEQDIADVSAYYAEHGTSAGAPAKPSREPNAQVAQLLQKGACVSCHGENFAKPIDPSYPKIAGQHADYLFVALKSYKTDKGAYVGRSNGVMAGIAKQFSNTELKALAGYLGSLDGDLQVVPQPRFR	1	0	309	1	NA	NA	NA	no_plot	1546149	Diaphorobacter polyhydroxybutyrativorans	TRUE	NA	NA	1546149	Diaphorobacter polyhydroxybutyrativorans	238749	Diaphorobacter	80864	Comamonadaceae	80840	Burkholderiales	28216	Betaproteobacteria	1224	Proteobacteria	2	Bacteria	131567	cellular organisms
267	NZ_CP016278.1[3929527..3944547]	Diaphorobacter polyhydroxybutyrativorans	1546149	universal stress protein_1	universal stress protein	universal stress protein	WP_088888399.1	267#WP_088888399.1#NZ_CP016278.1[3929527..3944547]	NA	1	903	MRLQTIVALTDFSTAAEHALDRAALLAAEHKARLHLLFGAEQPDPKFVDPQARLEQRARQLARRHDLPVKALAYRGAGVVDEVLRAAVGADLLVLDKRAHQGVEQLWRGGTLSQILRRSPCPVLVVQRAAREAYAHVLLAVDFSPAADAMVRYASGLDTAAAVELFHAVDLRDEAKLRSAEASAQAVRAWRAQMQRHAHDRLVRLSDAFEARRNRVGMTVGMGDVARQVAVQQERSGAELVALMHRRRGWMLDLLLGSVAQRLLGGVGCDVLVYPHDYAGAAPRGTTAQPRVARRWTQAI	0	768	1671	2	NA	NA	NA	no_plot	1546149	Diaphorobacter polyhydroxybutyrativorans	TRUE	NA	NA	1546149	Diaphorobacter polyhydroxybutyrativorans	238749	Diaphorobacter	80864	Comamonadaceae	80840	Burkholderiales	28216	Betaproteobacteria	1224	Proteobacteria	2	Bacteria	131567	cellular organisms
268	NZ_CP016278.1[3929527..3944547]	Diaphorobacter polyhydroxybutyrativorans	1546149	DUF1841 family protein_-1	DUF1841 family protein	DUF1841 family protein	WP_041836092.1	268#WP_041836092.1#NZ_CP016278.1[3929527..3944547]	NA	-1	435	MFNPTQADVRRFFCATHAKQQAGQPMEAIETLAGLWIAEHPEYQPELADVDTALARNYDETPDRTNPFLHLSMHLSISEQCSIDQPRGIRQAVELLAARLGSLHDAHHAAMECLGTMLWEAQRAGRAPDGDAYIACVQRRATRG	0	1631	2066	3	NA	NA	NA	no_plot	1546149	Diaphorobacter polyhydroxybutyrativorans	TRUE	NA	NA	1546149	Diaphorobacter polyhydroxybutyrativorans	238749	Diaphorobacter	80864	Comamonadaceae	80840	Burkholderiales	28216	Betaproteobacteria	1224	Proteobacteria	2	Bacteria	131567	cellular organisms
269	NZ_CP016278.1[3929527..3944547]	Diaphorobacter polyhydroxybutyrativorans	1546149	hypothetical protein_1	hypothetical protein	hypothetical protein	WP_015914177.1	269#WP_015914177.1#NZ_CP016278.1[3929527..3944547]	NA	1	222	MTGMRILGVILLILGLAGFFTGGFSFTKETTQARIGPLELSVKEKESVNVPQWLSIGAIAVGALVLVLSMRKP	0	2216	2438	4	NA	NA	NA	no_plot	1546149	Diaphorobacter polyhydroxybutyrativorans	TRUE	NA	NA	1546149	Diaphorobacter polyhydroxybutyrativorans	238749	Diaphorobacter	80864	Comamonadaceae	80840	Burkholderiales	28216	Betaproteobacteria	1224	Proteobacteria	2	Bacteria	131567	cellular organisms
270	NZ_CP016278.1[3929527..3944547]	Diaphorobacter polyhydroxybutyrativorans	1546149	IclR family transcriptional regulator_-1	IclR family transcriptional regulator	IclR family transcriptional regulator	WP_088888400.1	270#WP_088888400.1#NZ_CP016278.1[3929527..3944547]	NA	-1	804	MDDTPLSVSNTHKPGDSYVQSFARGLEVIRSFSAAAPQQTLSEVAARTGLTRAGARRILLTLQTLGYLESDGRLFRLTPRILDLGFAYLSSMPIWDLAEPLMEALTDRVHESCSAAVLDGLDIVYVLRVHTHKIMSTNLAVGSRLPAFWTSLGRVLLAELPEQDLRARLAALPRQQFTRHTVLDDATLLARIAQARAQGWCLVDQELEEGLISVAAPLKNRAGQVVAALNISGQANRTSTEMLREQLLPELLATAQTISRMLGTHRP	0	2504	3308	5	NA	NA	NA	no_plot	1546149	Diaphorobacter polyhydroxybutyrativorans	TRUE	NA	NA	1546149	Diaphorobacter polyhydroxybutyrativorans	238749	Diaphorobacter	80864	Comamonadaceae	80840	Burkholderiales	28216	Betaproteobacteria	1224	Proteobacteria	2	Bacteria	131567	cellular organisms
271	NZ_CP016278.1[3929527..3944547]	Diaphorobacter polyhydroxybutyrativorans	1546149	3-oxoacid CoA-transferase subunit A_1	3-oxoacid CoA-transferase subunit A	3-oxoacid CoA-transferase subunit A	WP_015914175.1	271#WP_015914175.1#NZ_CP016278.1[3929527..3944547]	NA	1	696	MINKIADSVAEALAGVQDGATVLIGGFGTSGNPIELINGLIAQGARDLTVVNNNAGNGDAGLAALLKSGQVRKIICSFPRQVDSYVFDELYRSGKIELELVPQGNLAERMRAAGAGIGAFFCPTAYGTQLAEGKETREINGKHYVLEYPIYGDVALVKAEKGDRWGNLTYRMSARNFGPVCAMAAKYTVATVHELVELGEMDPEAVVTPGIYVSKVVQVPRVATQAGGFKK	0	3422	4118	6	NA	NA	NA	no_plot	1546149	Diaphorobacter polyhydroxybutyrativorans	TRUE	NA	NA	1546149	Diaphorobacter polyhydroxybutyrativorans	238749	Diaphorobacter	80864	Comamonadaceae	80840	Burkholderiales	28216	Betaproteobacteria	1224	Proteobacteria	2	Bacteria	131567	cellular organisms
272	NZ_CP016278.1[3929527..3944547]	Diaphorobacter polyhydroxybutyrativorans	1546149	3-oxoacid CoA-transferase subunit B_1	3-oxoacid CoA-transferase subunit B	3-oxoacid CoA-transferase subunit B	WP_088888401.1	272#WP_088888401.1#NZ_CP016278.1[3929527..3944547]	NA	1	654	MSSYQKRTKDELAARVAQDIFDGAYVNLGIGQPTLVANHIPAGREVVLHSENGILGMGPAPAKGQEDYDLTNAGKQPVTLLPGGCYFHHADSFAMMRGGHLDICVLGAFQVSATGDLANWSTGEPGAIPAVGGAMDLAVGAKSTWVMMDLVSKTGECKVVQACSYPLTGLACVKRIYTDLCTLECTPQGLRLIDTVPGLSHEELERIVGLPIQPAQQ	0	4145	4799	7	NA	NA	NA	no_plot	1546149	Diaphorobacter polyhydroxybutyrativorans	TRUE	NA	NA	1546149	Diaphorobacter polyhydroxybutyrativorans	238749	Diaphorobacter	80864	Comamonadaceae	80840	Burkholderiales	28216	Betaproteobacteria	1224	Proteobacteria	2	Bacteria	131567	cellular organisms
273	NZ_CP016278.1[3929527..3944547]	Diaphorobacter polyhydroxybutyrativorans	1546149	3-oxoadipyl-CoA thiolase_1	3-oxoadipyl-CoA thiolase	3-oxoadipyl-CoA thiolase	WP_015914173.1	273#WP_015914173.1#NZ_CP016278.1[3929527..3944547]	NA	1	1212	MSNARQAFICDAIRTPFGRYGGALSSVRTDDLGALPIKALMERNPGVDWAAVDDVLYGNANQAGEDNRNVARMSSLLAGLPIDVPGATINRLCGSGLDAVGSAARAIKSGEARLMIAGGVESMSRAPFVMPKAESAFSRSNAVYDTTIGWRFINKLMKAQYGVDSMPETAENVADDFKIEREAQDRMALASQQKAAAAMAAGYLAKEIVNVVIPQKKGDAVVVSQDEHPRATTLEALAKLKGVVREGGTVTAGNASGVNDGACALLLADEAAAQQYNLVPRARVVGMAVAGVAPRIMGFGPAPAVRKVLAQTGLTLDQMDVIELNEAFAAQGLAVLRDLGVADDDKRVNQWGGAIALGHPLGASGARLATTAVNQLHTLGGRYALCTMCIGVGQGIAVV…	0	4874	6086	8	NA	NA	NA	no_plot	1546149	Diaphorobacter polyhydroxybutyrativorans	TRUE	NA	NA	1546149	Diaphorobacter polyhydroxybutyrativorans	238749	Diaphorobacter	80864	Comamonadaceae	80840	Burkholderiales	28216	Betaproteobacteria	1224	Proteobacteria	2	Bacteria	131567	cellular organisms
274	NZ_CP016278.1[3929527..3944547]	Diaphorobacter polyhydroxybutyrativorans	1546149	3-oxoadipate enol-lactonase_1	3-oxoadipate enol-lactonase	3-oxoadipate enol-lactonase	WP_088888402.1	274#WP_088888402.1#NZ_CP016278.1[3929527..3944547]	NA	1	801	MKKQERWVDVQGGRLRVCVQGPEGAPALVFSNSLGTTLEMWDAQAARFAQDFRVVRYDTRGHGASVVTPGPYTFELLGGDVVAVLDALRIERAHFCGISMGGFTGLWLGVHQPQRLLSLAVCNSAAKIGTAEGWQARAALVREKGRDAMAELAASSPARWFTPAFCAAEPDVVLRAQSWIAGISPEGYAACCEALALADLRSQMGGIDVPTLIVAGSADPVTTVADGRFMQAAIAGARLAEVPASHLSNLEAPQAFDEALAQFLRG	0	6113	6914	9	NA	NA	NA	no_plot	1546149	Diaphorobacter polyhydroxybutyrativorans	TRUE	NA	NA	1546149	Diaphorobacter polyhydroxybutyrativorans	238749	Diaphorobacter	80864	Comamonadaceae	80840	Burkholderiales	28216	Betaproteobacteria	1224	Proteobacteria	2	Bacteria	131567	cellular organisms
275	NZ_CP016278.1[3929527..3944547]	Diaphorobacter polyhydroxybutyrativorans	1546149	tripartite tricarboxylate transporter substrate binding protein_1	tripartite tricarboxylate transporter substrate binding protein	tripartite tricarboxylate transporter substrate binding protein	WP_088888403.1	275#WP_088888403.1#NZ_CP016278.1[3929527..3944547]	NA	1	993	MTNLHHTTRRTLLASLAVAAAGALPLGALAQNFPTKPITIIVPFSAGGTTDILARIVGQGLTTELGQSVVVDNKPGAGGNIGGSLAAKAAADGYTLFMGTVGTHAINQSLYKKMPFDPVKDFAPLSRVATVPNLLVAHPSQPFKTVKEMIAYAKANPGKITFGSPGSGASPHVSGELFKSMTGTDLLHIPYKGSAPAMTDLLGGQTSVMFDNMPSAIQHVRSGKLRPIAVTTAKRSPELPDVPTIAEAGVPGYEATSWFGMFAPAGTPKPVLDKLHAALIKVLNQADVKKKIAEQGGDVVAETPAQFAAFIQAESVKWGKVVKESGATAD	0	7002	7995	10	tph_c	NA	NA	no_plot	1546149	Diaphorobacter polyhydroxybutyrativorans	TRUE	NA	NA	1546149	Diaphorobacter polyhydroxybutyrativorans	238749	Diaphorobacter	80864	Comamonadaceae	80840	Burkholderiales	28216	Betaproteobacteria	1224	Proteobacteria	2	Bacteria	131567	cellular organisms
276	NZ_CP016278.1[3929527..3944547]	Diaphorobacter polyhydroxybutyrativorans	1546149	glutathione-regulated potassium-efflux system protein KefC_-1	glutathione-regulated potassium-efflux system protein KefC	glutathione-regulated potassium-efflux system protein KefC	WP_088888404.1	276#WP_088888404.1#NZ_CP016278.1[3929527..3944547]	NA	-1	1872	MAQAPVWLTYGFTYLAAAVIAVPIARALGLGAIIGYLAAGIAIGPWGLALVSNVQDILHFAEFGVVLMLFLVGLELQPSRLWSLRRPIFGLGTAQMVGCAALLWAAAWAFGLPWRVGLVGALGLALSSTAIALQVINERNLMRTDSGQKAFSILLFQDVAAIPILALLPLLGVAARAAELDHPHEVRGLLLEAAKILGVVGAIVLGGRLALRPLLRWIAKSKTPEIFTATSLFLVVGIAMLMLSVGLSMALGAFLAGVLLADSEFRRELETDIEPFKGLLLGLFFIAVGMSIDFGVILRTPWGMLALLLGFLGIKALVIWTLARVTAMPYQERPVFTLLLAQGGEFAFVVFQAGAGFRAIPAEMASLLIGAVALSMLISPLLLVLLDRVLLKRFATLKT…	0	8116	9988	11	NA	NA	NA	no_plot	1546149	Diaphorobacter polyhydroxybutyrativorans	TRUE	NA	NA	1546149	Diaphorobacter polyhydroxybutyrativorans	238749	Diaphorobacter	80864	Comamonadaceae	80840	Burkholderiales	28216	Betaproteobacteria	1224	Proteobacteria	2	Bacteria	131567	cellular organisms
277	NZ_CP016278.1[3929527..3944547]	Diaphorobacter polyhydroxybutyrativorans	1546149	LysE family transporter_1	LysE family transporter	LysE family transporter	WP_011806642.1	277#WP_011806642.1#NZ_CP016278.1[3929527..3944547]	NA	1	639	MDWHTWMAFFAASWVIAISPGSGAVLSMSHGLSYGVRKAGATILGLELGLLLILVVAGAGVGSLLVASELAFSIVKVLGACYLIYLGFMQWRAGAAGTLQGDLQAQPASWRRRVLTGLLTNATNPKGIIFMVAVLPQFMTDTRPLWSQLLVMAVTMLSVDLIVMNGYAASASALRTLMRSGRAMRTQNRVFGGLLMLVGAGLFFVKRGTQHG	0	10274	10913	12	NA	NA	NA	no_plot	1546149	Diaphorobacter polyhydroxybutyrativorans	TRUE	NA	NA	1546149	Diaphorobacter polyhydroxybutyrativorans	238749	Diaphorobacter	80864	Comamonadaceae	80840	Burkholderiales	28216	Betaproteobacteria	1224	Proteobacteria	2	Bacteria	131567	cellular organisms
278	NZ_CP016278.1[3929527..3944547]	Diaphorobacter polyhydroxybutyrativorans	1546149	ParA family protein_1	ParA family protein	ParA family protein	WP_088888405.1	278#WP_088888405.1#NZ_CP016278.1[3929527..3944547]	NA	1	621	MTVVAVANPKGGVGKSTLATNIAGYYASRGHAVVLGDLDRQQSARLWLQQRPAAARPIGAWDVEPDRFDKPPKHAAHAVLDTPAGLHGWRLKDMLKLADRIIVPLQPSVFDIFATRQFLDELAAHRRSAGVPIGIVGMRVDARTIAADKLHAFVDSLGLPVLGYLRDTQNYIHLAAHGLSLFDLSPGRVARDLEQWQGICAWLDGA	0	11060	11681	13	NA	NA	NA	no_plot	1546149	Diaphorobacter polyhydroxybutyrativorans	TRUE	NA	NA	1546149	Diaphorobacter polyhydroxybutyrativorans	238749	Diaphorobacter	80864	Comamonadaceae	80840	Burkholderiales	28216	Betaproteobacteria	1224	Proteobacteria	2	Bacteria	131567	cellular organisms
279	NZ_CP016278.1[3929527..3944547]	Diaphorobacter polyhydroxybutyrativorans	1546149	MaoC family dehydratase_1	MaoC family dehydratase	MaoC family dehydratase	WP_088888406.1	279#WP_088888406.1#NZ_CP016278.1[3929527..3944547]	NA	1	465	MKTFRSYSEVASCVGQEVAVTDWVEVTQAQIDRFADATGDHQWIHVDPQRAAQGPFGTTIAHGFLTLSLLPRFMEASFAIAGARMGVNYGLNRVRFPAPVPVGSRLRARMVLAAAEPVAPDGMQMTWEVTLEREGGDKPVCVAEALVRSYGAPA	0	11763	12228	14	NA	NA	NA	no_plot	1546149	Diaphorobacter polyhydroxybutyrativorans	TRUE	NA	NA	1546149	Diaphorobacter polyhydroxybutyrativorans	238749	Diaphorobacter	80864	Comamonadaceae	80840	Burkholderiales	28216	Betaproteobacteria	1224	Proteobacteria	2	Bacteria	131567	cellular organisms
280	NZ_CP016278.1[3929527..3944547]	Diaphorobacter polyhydroxybutyrativorans	1546149	tRNA (cytidine(34)-2'-O)-methyltransferase_-1	tRNA (cytidine(34)-2'-O)-methyltransferase	tRNA (cytidine(34)-2'-O)-methyltransferase	WP_088888407.1	280#WP_088888407.1#NZ_CP016278.1[3929527..3944547]	NA	-1	489	MFHIVLVEPEIPPNTGNVIRLAANTGCMLHLVEPLGFSMEDPLMRRAGLDYHEYAEVRRHPGWTALLRDMQPDLSRMFALTTHGTQSVYDTGFLPGDWFVFGAESRGLPPELRETFPPAQRLRLPMLPNQRSLNLSNAVAVTVYEAWRQNSFLTPPTQTQPA	0	12259	12748	15	NA	NA	NA	no_plot	1546149	Diaphorobacter polyhydroxybutyrativorans	TRUE	NA	NA	1546149	Diaphorobacter polyhydroxybutyrativorans	238749	Diaphorobacter	80864	Comamonadaceae	80840	Burkholderiales	28216	Betaproteobacteria	1224	Proteobacteria	2	Bacteria	131567	cellular organisms
281	NZ_CP016278.1[3929527..3944547]	Diaphorobacter polyhydroxybutyrativorans	1546149	ComF family protein_-1	ComF family protein	ComF family protein	WP_047349750.1	281#WP_047349750.1#NZ_CP016278.1[3929527..3944547]	NA	-1	729	MLFTHLATHLAGISRGLARMGAAVPSRCAVCHAWPARPVCDACRMQFAPPLPRCATCARLLPHGVAQCGDCLRHPPPLDACVAAVSYAFPWADLLAQFKFHAEPGWAGALAQLMARAPGAQAALAQADLVLPVPLSPERLRQRGYNQALLLARALGHPQVHARMLLRVRDTEAQSHLARAERLRNLRGAFVPDPLRAAQLAGKRVLLVDDVMTTGATLHAAAAPLRDAGALQVCALVLARTP	0	12838	13567	16	NA	NA	NA	no_plot	1546149	Diaphorobacter polyhydroxybutyrativorans	TRUE	NA	NA	1546149	Diaphorobacter polyhydroxybutyrativorans	238749	Diaphorobacter	80864	Comamonadaceae	80840	Burkholderiales	28216	Betaproteobacteria	1224	Proteobacteria	2	Bacteria	131567	cellular organisms
282	NZ_CP016278.1[3929527..3944547]	Diaphorobacter polyhydroxybutyrativorans	1546149	biotin synthase_1	biotin synthase	biotin synthase	WP_015914166.1	282#WP_015914166.1#NZ_CP016278.1[3929527..3944547]	NA	1	909	MSEHLPPTIDPVAAARWHAMVPEVSPWLHEEVAQRMQERLQWIVQAPQAWCDWDPLRGGVQGHGLVGQHFEQAASHITETSSPAGEALARVRFAKPWWSPARWSAAAPRFGVPPEGSVQMLWSNMALHMAADPQALITQWHRALAVDGYLMFSCLGPDTLRELHALYAELGWPAAGHAMTDMHDWGDMLVHAGFAEPVMDMERITLTFATPERLLQELRGLGRNLHPQRFPALRGRHWRQRLEEALAQRLADPRHEGQLALTFEVVYGHAFKPAPRVRVEGSSAVSLQDMRAMLHAGRTLPR	0	13602	14511	17	NA	NA	NA	no_plot	1546149	Diaphorobacter polyhydroxybutyrativorans	TRUE	NA	NA	1546149	Diaphorobacter polyhydroxybutyrativorans	238749	Diaphorobacter	80864	Comamonadaceae	80840	Burkholderiales	28216	Betaproteobacteria	1224	Proteobacteria	2	Bacteria	131567	cellular organisms
283	NZ_CP016278.1[3929527..3944547]	Diaphorobacter polyhydroxybutyrativorans	1546149	cytochrome c oxidase subunit II_1	cytochrome c oxidase subunit II	cytochrome c oxidase subunit II	WP_088888408.1	283#WP_088888408.1#NZ_CP016278.1[3929527..3944547]	NA	1	89	MKSISNKLASGLLMAGAWVGTAAHAVQSLPGGPAVNQLNLHPPVTKIAEEQHFLHWMMLIICTVIFVGVFSVMFYSIWKHRKSRGAQAANFHESVTVEVVWTVIPFIIVVLMALPATKVLVAQKDTTNADLTVKVTGYQWKWGYDYLSGEGEGLSFISTLDSSHRRMSDSGNVANAPADYLLKVDAPLVVPVGKKVRVITTANDVIHAFMVPAFGIKQDAIPGFVRDTWFRAEKVGDYYGQCAELCGKEHAYMPIHVKVVSAQDYTQWVDGEKKKAAAKLDDPSKVWTLDALLPRGEKVYAANCAACHQANGKGAGPIKPLDGSAIVTDADHAKQIQVVLKGAANGAMPAWAQLSDTDLAAVVTYTKNAWSNKTGQLVQPSEIVAQRGK	1	14932	15021	18	NA	NA	NA	no_plot	1546149	Diaphorobacter polyhydroxybutyrativorans	TRUE	NA	NA	1546149	Diaphorobacter polyhydroxybutyrativorans	238749	Diaphorobacter	80864	Comamonadaceae	80840	Burkholderiales	28216	Betaproteobacteria	1224	Proteobacteria	2	Bacteria	131567	cellular organisms
284	NZ_CP021455.1[3198478..3213610]	Comamonas serinivorans	1082851	helix-turn-helix domain-containing protein_-1	helix-turn-helix domain-containing protein	helix-turn-helix domain-containing protein	WP_087281886.1	284#WP_087281886.1#NZ_CP021455.1[3198478..3213610]	NA	-1	764	MSDSQMPEGVPAEESVTDAGPVTAGRLLREARERMHVDVAVLASMLKVPEHKLRALEADQLDQLPDLTFARALAASVCRTLQIEPAPVLALLPQGTKAGALPGRGHAPINAPYRTQSESTVAARTGSVLQSRYIWLVFTILLAAVVLALLPSLDRLSLPDAGQDTRAVAAQPAASVAAAPATDIASAPVEVASAAAAPAAAGSAAVAAQAPASAASAVVTSGDDLHLTAAQDSWVQVRDASGKTLLSRTIKAGETLGLTGQAPYRVVVGNIQGLTLQVRGQPFDFSTVTKTTTARFEVQ	1	0	764	1	tph_r	NA	NA	no_plot	1082851	Comamonas serinivorans	TRUE	NA	NA	1082851	Comamonas serinivorans	283	Comamonas	80864	Comamonadaceae	80840	Burkholderiales	28216	Betaproteobacteria	1224	Proteobacteria	2	Bacteria	131567	cellular organisms
285	NZ_CP021455.1[3198478..3213610]	Comamonas serinivorans	1082851	tetratricopeptide repeat protein_-1	tetratricopeptide repeat protein	tetratricopeptide repeat protein	WP_087281888.1	285#WP_087281888.1#NZ_CP021455.1[3198478..3213610]	NA	-1	861	MNAFARSAHRPLFPMEAHWRSWTRQGAVAVLVGAALLVGCTSTRTTSSTNSTDLADADRKVQPNRERATIRLTLATSYFQEGQYDVALEETSRVLDIDDTFSDAYSLRGLIYQRQGEFPKAQASFRRALQLKPSDADARHNLALMYCQNNQLAQAVDEFNQAVAAARQRDRGKTLLAMGICQVRLGDRNGGEASLARALQADPGNPLAAYNLALLQYQRGAYPEAMASVRVLNNGDRANAESMWLGIRIARKAGDGRTMRDLIEQMRRRFASSPQYQLLEQGAFDE	0	756	1617	2	NA	NA	NA	no_plot	1082851	Comamonas serinivorans	TRUE	NA	NA	1082851	Comamonas serinivorans	283	Comamonas	80864	Comamonadaceae	80840	Burkholderiales	28216	Betaproteobacteria	1224	Proteobacteria	2	Bacteria	131567	cellular organisms
286	NZ_CP021455.1[3198478..3213610]	Comamonas serinivorans	1082851	23S rRNA (adenine(2503)-C(2))-methyltransferase RlmN_-1	23S rRNA (adenine(2503)-C(2))-methyltransferase RlmN	23S rRNA (adenine(2503)-C(2))-methyltransferase RlmN	WP_087281890.1	286#WP_087281890.1#NZ_CP021455.1[3198478..3213610]	NA	-1	1203	MTMTNLLDFDLDGLAAYCEQLGEKRFRATQLFRWIHQRGARDFSQMTDLAKSLRDKLATRATMAALPVISEHTSADGTVKWLFDVGDGNAIETVFIPEDDRGTLCVSSQAGCAVGCRFCSTGHQGFSRNLSTGEILAQLWWAEHTLRERFRLQAVSADPRSTDNGKPGIPLAGAAERVITNVVMMGMGEPLQNYRALVPALKVMLDDHGYGLSRRRVTVSTSGVVPMMERLMQDCPVAMAVSLHAPNDPLRDHLVPLNKKYPLAELLATCKAYLAHAPRDFITFEYCMLDGVNDQPEHAQQLIDLVRTHDVRCKFNLIPFNPFPASGLTRSPHAVVQAFGRRLNEAGIVTTVRKTRGDDIDAACGQLAGDVKDRTRAASRMAERRVVMMQTEPAPRAARP	0	1654	2857	3	NA	NA	NA	no_plot	1082851	Comamonas serinivorans	TRUE	NA	NA	1082851	Comamonas serinivorans	283	Comamonas	80864	Comamonadaceae	80840	Burkholderiales	28216	Betaproteobacteria	1224	Proteobacteria	2	Bacteria	131567	cellular organisms
287	NZ_CP021455.1[3198478..3213610]	Comamonas serinivorans	1082851	nucleoside-diphosphate kinase_-1	nucleoside-diphosphate kinase	nucleoside-diphosphate kinase	WP_087281892.1	287#WP_087281892.1#NZ_CP021455.1[3198478..3213610]	NA	-1	429	MAIEKTLSIIKPDAVAKNVIGQIYARFEGAGLKVIAARMQHLSRQEAEQFYAVHKERPFFKDLVDFMVSGPVMIQALEGEGAILKNRELMGATDPKKADKGTIRADFADSIDANAVHGSDAAETAAVEIAFFFPGLAVYSGR	0	2893	3322	4	NA	NA	NA	no_plot	1082851	Comamonas serinivorans	TRUE	NA	NA	1082851	Comamonas serinivorans	283	Comamonas	80864	Comamonadaceae	80840	Burkholderiales	28216	Betaproteobacteria	1224	Proteobacteria	2	Bacteria	131567	cellular organisms
288	NZ_CP021455.1[3198478..3213610]	Comamonas serinivorans	1082851	hypothetical protein_1	hypothetical protein	hypothetical protein	WP_157667687.1	288#WP_157667687.1#NZ_CP021455.1[3198478..3213610]	NA	1	186	MVSRLSLAGDGQVSATGFFDEIQQFVECVQHGGLSDQSDAIRSWSLGTHLLRRESGGFPYQ	0	3566	3752	5	NA	NA	NA	no_plot	1082851	Comamonas serinivorans	TRUE	NA	NA	1082851	Comamonas serinivorans	283	Comamonas	80864	Comamonadaceae	80840	Burkholderiales	28216	Betaproteobacteria	1224	Proteobacteria	2	Bacteria	131567	cellular organisms
289	NZ_CP021455.1[3198478..3213610]	Comamonas serinivorans	1082851	LysR family transcriptional regulator_-1	LysR family transcriptional regulator	LysR family transcriptional regulator	WP_087281894.1	289#WP_087281894.1#NZ_CP021455.1[3198478..3213610]	NA	-1	912	MELRHLRYFLVLAEELHYGRAAERLAMSQPPLSVAIRQLEDAVGTRLLERNSKSVRLTAAGKALAVSARQVLEQAEEAKRLAHAVGEGKAGRLRVGFVGGMLFRGLAQALQQLAHTHPLLEVHLTEMNTHDQLLALAQGRLELAFVHSAPPQPGLQVQLLASEQFVACLPQGHRLAGQPRIELAQLADEAFVLFSATASPDYHVQILHLCAQAGLNPAIRHEVRHWLSVVSMVAQGMGVALVPQSLSQAGLPGVAYLPLRHRVSPSQTFAAWRTESDPAVAALLGHLTSRPGDEVRSPAPPEA	0	4064	4976	6	NA	NA	NA	no_plot	1082851	Comamonas serinivorans	TRUE	NA	NA	1082851	Comamonas serinivorans	283	Comamonas	80864	Comamonadaceae	80840	Burkholderiales	28216	Betaproteobacteria	1224	Proteobacteria	2	Bacteria	131567	cellular organisms
290	NZ_CP021455.1[3198478..3213610]	Comamonas serinivorans	1082851	acyl-CoA dehydrogenase family protein_1	acyl-CoA dehydrogenase family protein	acyl-CoA dehydrogenase family protein	WP_087281896.1	290#WP_087281896.1#NZ_CP021455.1[3198478..3213610]	NA	1	1719	MTTSPAQPPVNPAIPDRQGQNFYTSDEQLAAVLRLYLPPAVLDKLTPVFTRLGALAGGPLDELASISDKNPPTLSLRTRTGLNQQVIHKHPAYVEMERLALSEFGMATVSHREDMFGVPGKLPPAVKYVLFYLFVQAEFGLCCPVSMTDSLTRTLKKFGAPQLVEKYLPRLTSLDFDELAQGAMFMTEQAAGSDIAATVTRAEAQPDGSWKLFGDKWFCSNPDADFAMVLARSNTEQPGMKGVSLFLLPKTLDDGSANAYRIIRLKDKLGTRSMASGEITLEGATAYLVGEEGRGFVQMADMVNNSRLSNGVRAAGLMRRAVGEAEFIAANRQAFGKKLAQMPLMQRQLDKLRVPAEQARTMVFQTAQALARSDAGEPDAYALARILTPMIKFRACRDA…	0	5076	6795	7	NA	NA	NA	no_plot	1082851	Comamonas serinivorans	TRUE	NA	NA	1082851	Comamonas serinivorans	283	Comamonas	80864	Comamonadaceae	80840	Burkholderiales	28216	Betaproteobacteria	1224	Proteobacteria	2	Bacteria	131567	cellular organisms
291	NZ_CP021455.1[3198478..3213610]	Comamonas serinivorans	1082851	tripartite tricarboxylate transporter substrate binding protein_1	tripartite tricarboxylate transporter substrate binding protein	tripartite tricarboxylate transporter substrate binding protein	WP_087281897.1	291#WP_087281897.1#NZ_CP021455.1[3198478..3213610]	NA	1	996	MNNLITLSRRLVAGLALASLATWAAAPAWAETFPSKPVQFVVPFPPGGPTDAMARTLAAELSQLLGQPVVVENKGGAGGNIGADYVARAQPDGYTLMFGTSGPLAINKSLYRKLNYDPATSFTPIIYVGYLPNILVVNPKLPVKTVPELIAYAKANPGKLSYASSGNGASSHLAGVLFNGMAGTDLMHVPYKGTGPALNDLLAGQVGMTFTDILTAKPYAEAGRVRALGVATLKRSQALPQVPTIAEQGVKGYDVSVFFGVVAPKGLPADRQATLNQAFARVLASPRVKQALADQGLEASPDTRPAALAQFIQDESAKWAKVMKAAGAMLD	0	7061	8057	8	tph_c	NA	NA	no_plot	1082851	Comamonas serinivorans	TRUE	NA	NA	1082851	Comamonas serinivorans	283	Comamonas	80864	Comamonadaceae	80840	Burkholderiales	28216	Betaproteobacteria	1224	Proteobacteria	2	Bacteria	131567	cellular organisms
292	NZ_CP021455.1[3198478..3213610]	Comamonas serinivorans	1082851	PaaI family thioesterase_1	PaaI family thioesterase	PaaI family thioesterase	WP_087281900.1	292#WP_087281900.1#NZ_CP021455.1[3198478..3213610]	NA	1	444	MPVVPDLPLFTETADNEFFGLPMEMARTIRLTGEAIAGHHCRVRLPYNKAFTNSRGDMHGGMIATLFDAGLSAACRAHDPRKYGVVTIDLTIHFMAPAPGDMICHAVCERRGKSISFARGEIRNDAGELLGMATGTFKLLERGVAQP	0	8224	8668	9	NA	NA	NA	no_plot	1082851	Comamonas serinivorans	TRUE	NA	NA	1082851	Comamonas serinivorans	283	Comamonas	80864	Comamonadaceae	80840	Burkholderiales	28216	Betaproteobacteria	1224	Proteobacteria	2	Bacteria	131567	cellular organisms
293	NZ_CP021455.1[3198478..3213610]	Comamonas serinivorans	1082851	CoA transferase_1	CoA transferase	CoA transferase	NA	293#NA#NZ_CP021455.1[3198478..3213610]	NA	1	NA	NA	NA	8805	9971	10	pseudogene	NA	NA	no_plot	1082851	Comamonas serinivorans	TRUE	NA	NA	1082851	Comamonas serinivorans	283	Comamonas	80864	Comamonadaceae	80840	Burkholderiales	28216	Betaproteobacteria	1224	Proteobacteria	2	Bacteria	131567	cellular organisms
294	NZ_CP021455.1[3198478..3213610]	Comamonas serinivorans	1082851	hypothetical protein_-1	hypothetical protein	hypothetical protein	WP_087281902.1	294#WP_087281902.1#NZ_CP021455.1[3198478..3213610]	NA	-1	339	MLNRIVAIAALGLFAAAGAQAASQEEWASPNPAQLVAVGQSQSAHVSPAAQIEAGERPDYLTAPAGQLSREAVNADTQRWLNDGLRQYGAGEGGALNNAQTRAALKAYGQHS	0	10447	10786	11	NA	NA	NA	no_plot	1082851	Comamonas serinivorans	TRUE	NA	NA	1082851	Comamonas serinivorans	283	Comamonas	80864	Comamonadaceae	80840	Burkholderiales	28216	Betaproteobacteria	1224	Proteobacteria	2	Bacteria	131567	cellular organisms
295	NZ_CP021455.1[3198478..3213610]	Comamonas serinivorans	1082851	LysR family transcriptional regulator_1	LysR family transcriptional regulator	LysR family transcriptional regulator	WP_087281904.1	295#WP_087281904.1#NZ_CP021455.1[3198478..3213610]	NA	1	915	MDLFRALQAFVAVVDQGSLVKAAEHLARPTAVVSRQLSALEAHLGTRLLQRTTRRQALTEAGQEYYQRATQILAELEEAEAVVSQQTLRPEGLLRVAAPLSFGIHQLPGLLPELCERYPQLRLDIFVTDRVVDLLHDGIDLALRTHLEADENVVAREICRLPLVACAAPAYLARRGTPRHPRELEAHQTLSYTYLSYQDRWTFSDDVGNTQQAPIQPTVRATTGDLLRPLASAGHGIVAVPRYIVQDLLDSGALQPVLAGWHLQPLPLYAVFPSRKFISAKVRVFVNHLLDHLGAPDPHRLDLR	0	10980	11895	12	NA	NA	NA	no_plot	1082851	Comamonas serinivorans	TRUE	NA	NA	1082851	Comamonas serinivorans	283	Comamonas	80864	Comamonadaceae	80840	Burkholderiales	28216	Betaproteobacteria	1224	Proteobacteria	2	Bacteria	131567	cellular organisms
296	NZ_CP021455.1[3198478..3213610]	Comamonas serinivorans	1082851	multidrug efflux SMR transporter_1	multidrug efflux SMR transporter	multidrug efflux SMR transporter	WP_087281906.1	296#WP_087281906.1#NZ_CP021455.1[3198478..3213610]	NA	1	318	MAWIYLLFAGLLEVIWAYTMKLSNGFTKLGPSAITLVAMIASFGLLSVAMRSLPLGTAYTIWTGIGAVGAFVLGVTVLGEALTPMRVLAAVLIVTGLVLMKLSSS	0	12667	12985	13	NA	NA	NA	no_plot	1082851	Comamonas serinivorans	TRUE	NA	NA	1082851	Comamonas serinivorans	283	Comamonas	80864	Comamonadaceae	80840	Burkholderiales	28216	Betaproteobacteria	1224	Proteobacteria	2	Bacteria	131567	cellular organisms
297	NZ_CP021455.1[3198478..3213610]	Comamonas serinivorans	1082851	DUF1311 domain-containing protein_1	DUF1311 domain-containing protein	DUF1311 domain-containing protein	WP_087284691.1	297#WP_087284691.1#NZ_CP021455.1[3198478..3213610]	NA	1	495	MPFRSCLAPWFQPPALRQLRRRGGAPRVGALSPPHAWVLAAVGALCLAWTAPAAAQAGARCNPQGSVDEVNACSVRDFQQADTAIQVLYGDVMRIQPAHERPALRKEQTAWAREREARCRQQTAAQQARPEWPRLLHECLTRVTQERRAGLMRWMSADTPAAAP	0	13162	13657	14	NA	NA	NA	no_plot	1082851	Comamonas serinivorans	TRUE	NA	NA	1082851	Comamonas serinivorans	283	Comamonas	80864	Comamonadaceae	80840	Burkholderiales	28216	Betaproteobacteria	1224	Proteobacteria	2	Bacteria	131567	cellular organisms
298	NZ_CP021455.1[3198478..3213610]	Comamonas serinivorans	1082851	PaaI family thioesterase_-1	PaaI family thioesterase	PaaI family thioesterase	WP_087281908.1	298#WP_087281908.1#NZ_CP021455.1[3198478..3213610]	NA	-1	588	MSLHDDAAPPPGWLPLFRTSPYLDLNGPFFYQPHSPDQALSQGFLIGFRALPKHANARGKLHGGVFATVADVAMGYTLTAARTLPGKLVTTGLTLDYVGGGDIGDWITVEVTPVKNGKALGDCALHRAQRGRCAGDRARQLPGRVSREPAQAWADRGQAPAGIGRPCAAVVIGVDADIGLPGIAMRPIARRSGDR	0	13833	14421	15	NA	NA	NA	no_plot	1082851	Comamonas serinivorans	TRUE	NA	NA	1082851	Comamonas serinivorans	283	Comamonas	80864	Comamonadaceae	80840	Burkholderiales	28216	Betaproteobacteria	1224	Proteobacteria	2	Bacteria	131567	cellular organisms
299	NZ_CP021455.1[3198478..3213610]	Comamonas serinivorans	1082851	iron-sulfur cluster carrier protein ApbC_-1	iron-sulfur cluster carrier protein ApbC	iron-sulfur cluster carrier protein ApbC	WP_087281910.1	299#WP_087281910.1#NZ_CP021455.1[3198478..3213610]	NA	-1	645	MVFSLFQKSSGQAPDASVPPREAVLQALATVVDDDLGRDVVAAKLVRQVQIDRGQVSLELVLPYPAQSKFDALREAAEAAVRALPEVTAVQVSVRSEVVAHAAQRGVQLLPGVKNIIAVASGKGGVGKSTTAANLALALAAEGATVGLLDADIYGPSQPLMMGLAGHKPETTDGKTMEPLEAHGVQVISIGFLVAESQAMIWRGPMATQALDQLLRGTRWRDLDYLLVDLPPGTGDIQLSLAQRVPLTGAVIVTTPQDIALLDVRKGITLFEKVNVPILGVIENMAVHVCSQCGHSEHIFGAGGGARIAGEMGVKLLASMPLSLSIREQADGGTPTVAADPDSANAALYRAAARQLAVAVASTAKDYSNKFPTITVSNT	1	14488	15133	16	NA	NA	NA	no_plot	1082851	Comamonas serinivorans	TRUE	NA	NA	1082851	Comamonas serinivorans	283	Comamonas	80864	Comamonadaceae	80840	Burkholderiales	28216	Betaproteobacteria	1224	Proteobacteria	2	Bacteria	131567	cellular organisms
300	NZ_CP023270.1[3882658..3897659]	Achromobacter spanius	217203	30S ribosomal protein S20_1	30S ribosomal protein S20	30S ribosomal protein S20	WP_043542310.1	300#WP_043542310.1#NZ_CP023270.1[3882658..3897659]	NA	1	264	MANTAQARKRARQSVERNKHNSSLRSMLRTAIKRVRQSIAAGDKAAAGEVFQKATSVIDRVADKNIIHKNKAARHKSRLAAAIKALA	0	169	433	1	NA	NA	NA	no_plot	217203	Achromobacter spanius	TRUE	NA	NA	217203	Achromobacter spanius	222	Achromobacter	506	Alcaligenaceae	80840	Burkholderiales	28216	Betaproteobacteria	1224	Proteobacteria	2	Bacteria	131567	cellular organisms
301	NZ_CP023270.1[3882658..3897659]	Achromobacter spanius	217203	LysR family transcriptional regulator_-1	LysR family transcriptional regulator	LysR family transcriptional regulator	WP_105239499.1	301#WP_105239499.1#NZ_CP023270.1[3882658..3897659]	NA	-1	918	MLTHRHIEVFRAVMIAGSVTKAADLLNTSQPTVSRELARMEQTIGFALFERIAGRLRPTMPALALFEEVRQSYAGLERVASAAARLRAFREGQLSVITLPAFSHSILPDAFRCFHGRHAGVSLSVETQESPLLEEWLTAQRYDLGLTEHDSAPAGTRLELLVQVDEVCVLPDGHPLLARTAVALADFAGQAFVSLSASDPYRVQIDEAFAQAGVLPRSIVETPTAVSVCTFVRQGLGLAIVNPLTALDFVGRGLHIRPLTLSFPFRVNVVFPEHRPGNPLVGAFMDSLRDAAAAIKGRLAAAESA	0	605	1523	2	NA	NA	NA	no_plot	217203	Achromobacter spanius	TRUE	NA	NA	217203	Achromobacter spanius	222	Achromobacter	506	Alcaligenaceae	80840	Burkholderiales	28216	Betaproteobacteria	1224	Proteobacteria	2	Bacteria	131567	cellular organisms
302	NZ_CP023270.1[3882658..3897659]	Achromobacter spanius	217203	diaminopimelate decarboxylase_1	diaminopimelate decarboxylase	diaminopimelate decarboxylase	WP_105241585.1	302#WP_105241585.1#NZ_CP023270.1[3882658..3897659]	NA	1	1233	MTFDPRQLTQLAAEHGTPLWVYDAAVIRERIAQLRRFDTIRYAQKACSNLHILRLMRAQGVVVDAVSLGEIERSLAAGFDPRSEPEGIVFTADLIDHATLATALKHGITVNAGSLDMLSRVGEASPGHRVWLRINPGFGHGHSNKTNTGGPQSKHGIWIDDVAEAVAIVRRHGLKLVGVHMHIGSGVDYGHLSSVCDAMVDVVKSLDHDIEAISAGGGLSIPYRDGEPRIDCDHYFEQWDAARQRIAQYLGHEIRLEIEPGRFLIAESGVLVAEVHSINRRPERDFALVDAGFNDLMRPAMYGSYHRISVHAPDGSAPQDTPQTRIAVAGPLCESGDVFTQNEGGVMSDQLLPRPRIGDFMVFHNAGAYGSSMSSNYNSRPLAPEVLLDQGEARLIRRR…	0	1637	2870	3	NA	NA	NA	no_plot	217203	Achromobacter spanius	TRUE	NA	NA	217203	Achromobacter spanius	222	Achromobacter	506	Alcaligenaceae	80840	Burkholderiales	28216	Betaproteobacteria	1224	Proteobacteria	2	Bacteria	131567	cellular organisms
303	NZ_CP023270.1[3882658..3897659]	Achromobacter spanius	217203	2-dehydro-3-deoxyglucarate aldolase_-1	2-dehydro-3-deoxyglucarate aldolase	2-dehydro-3-deoxyglucarate aldolase	WP_105239500.1	303#WP_105239500.1#NZ_CP023270.1[3882658..3897659]	NA	-1	768	MNSPLPNRFRQRILARERLIGFWMCMSSHITAELVGLADFDWLLLDGEHSPNEVPMFLQQLQALQGSASAAVGRPSWNDPVEIKRLLDIGFYNLLIPFIESEDDARRAVAATRYPPQGIRGVAGAMRSNRYGTVPNYLHTINDNICVLLQIESRPGIEAVDEIAAVEGVDGVFIGPSDLAAALGHIGNPGHPEVQEAIRHLHQRVTAQGKAVGILAPVHADARRYLDMGMHFVAVGTDLGVFKQATFALREAFPT	0	2978	3746	4	NA	NA	NA	no_plot	217203	Achromobacter spanius	TRUE	NA	NA	217203	Achromobacter spanius	222	Achromobacter	506	Alcaligenaceae	80840	Burkholderiales	28216	Betaproteobacteria	1224	Proteobacteria	2	Bacteria	131567	cellular organisms
304	NZ_CP023270.1[3882658..3897659]	Achromobacter spanius	217203	Ldh family oxidoreductase_-1	Ldh family oxidoreductase	Ldh family oxidoreductase	WP_105239501.1	304#WP_105239501.1#NZ_CP023270.1[3882658..3897659]	NA	-1	1116	MSGNGAIATAVPVEQVREQILQVLMAWGMAEDLAHTTAGLMARTDLLGIDSHGISMLPAYEDKWRAGTLRLDARARVVRDGGASALIDGMGGLGYPVAAQAMNLAVDKALEHGVGAVAVCNSHHFGAAGVYARIAVDRGVVGLVTSSANGVIMVPTRGAMPMLGTNPIAFGAPAAYNEPFVLDMATTTVAANKVKVYDFLDKPLPPGWAVDGQGAPVTDADAAMQFIFKHPEGGLTPLGGTTAMSSHKGYGLAMMAQILGGTLSGSAFAARRAATRRPGEPDDVGHFFLALNPDAFRAAGSFESDMDDMIDAMHDTPPADPAEPVLVAGEPEAAERMRRLREGIPIPAALAERLRGICERAGTPYLLDPLS	0	3762	4878	5	NA	NA	NA	no_plot	217203	Achromobacter spanius	TRUE	NA	NA	217203	Achromobacter spanius	222	Achromobacter	506	Alcaligenaceae	80840	Burkholderiales	28216	Betaproteobacteria	1224	Proteobacteria	2	Bacteria	131567	cellular organisms
305	NZ_CP023270.1[3882658..3897659]	Achromobacter spanius	217203	FadR family transcriptional regulator_-1	FadR family transcriptional regulator	FadR family transcriptional regulator	WP_105239502.1	305#WP_105239502.1#NZ_CP023270.1[3882658..3897659]	NA	-1	702	MLERGHRVRLADQLYGQIFEQIVSGGLNVGDKLPSENEISERFGVSRPVVREALLRLRADGLITAHQGLGTFVSHQPAPRLKAFNDVQNVSAYLRAQEVRVALEGDAARLAALRRTDEQLGKIAEAHAAFADTLAKGQVSAEADLAFHASIAEASGNDFYLGVLESIHESISGFMRLTLNLTRTGSRQRAQRVVDEHATILDAIREQDGERARVAMQFHLGQARHRLVDRDRD	0	4926	5628	6	NA	NA	NA	no_plot	217203	Achromobacter spanius	TRUE	NA	NA	217203	Achromobacter spanius	222	Achromobacter	506	Alcaligenaceae	80840	Burkholderiales	28216	Betaproteobacteria	1224	Proteobacteria	2	Bacteria	131567	cellular organisms
306	NZ_CP023270.1[3882658..3897659]	Achromobacter spanius	217203	dihydrodipicolinate synthase family protein_-1	dihydrodipicolinate synthase family protein	dihydrodipicolinate synthase family protein	WP_105239503.1	306#WP_105239503.1#NZ_CP023270.1[3882658..3897659]	NA	-1	930	MKTTPVTAQDLQRSVIAVPPLARNADLSLNEAANKALLGHLEAGGVRNVMYGGNANFYNVGVSEYARIVDMLASLAGPDTWILPSVGPDYGKMMDQAAILRSRAFPTAMLLPMSFPYTDAGLADGVRRFTDALGKPAVVYIKSADYLAPETAARLIEEGRLVAFKYAVVRDNPSEDAYLSALLQAVDSRWVVSGIGERPAIVHYREFGLKSFTSGSVCVAPRGSMRLLHLLHEGRFAEAEAVREQYMGLEDCRDGISPIRVLHDAVTLSGVADMGPMLPLLTGISSAERERVAPVARALAAWDRETATA	0	5814	6744	7	NA	NA	NA	no_plot	217203	Achromobacter spanius	TRUE	NA	NA	217203	Achromobacter spanius	222	Achromobacter	506	Alcaligenaceae	80840	Burkholderiales	28216	Betaproteobacteria	1224	Proteobacteria	2	Bacteria	131567	cellular organisms
307	NZ_CP023270.1[3882658..3897659]	Achromobacter spanius	217203	tripartite tricarboxylate transporter substrate binding protein_1	tripartite tricarboxylate transporter substrate binding protein	tripartite tricarboxylate transporter substrate binding protein	WP_105241586.1	307#WP_105241586.1#NZ_CP023270.1[3882658..3897659]	NA	1	1002	MHAAPVRGRFLAAALLTATAFALPASPAFADYPEREVKIIVPFPAGGTADIAARVVAAELGKSWNKPVVVDNKAGAGGNVGSAEAARATPDGYTFLMGTVSTHAINQSVYAKLPYDPVKDFVPVTLVIPVPNILEVNPKFADKHGIRNVADLIKYLKANPDSVNMASTGNGTSTHLSGELFQSMTGTRMTHVPYKGSSPALTDVMAGQADLIFDNLPSSMGFIKAGKLRPLAVTTANRSPALPDVPTMAEAGVKGYEASSWFGLLAPAGTPPAIVEKVQRDVAAALQQEPVRAQLQAQGATPSGNTPAQFKQFMAQETVKWADVVKKSGAKVD	0	6979	7981	8	tph_c	NA	NA	no_plot	217203	Achromobacter spanius	TRUE	NA	NA	217203	Achromobacter spanius	222	Achromobacter	506	Alcaligenaceae	80840	Burkholderiales	28216	Betaproteobacteria	1224	Proteobacteria	2	Bacteria	131567	cellular organisms
308	NZ_CP023270.1[3882658..3897659]	Achromobacter spanius	217203	tripartite tricarboxylate transporter substrate binding protein_1	tripartite tricarboxylate transporter substrate binding protein	tripartite tricarboxylate transporter substrate binding protein	WP_105239504.1	308#WP_105239504.1#NZ_CP023270.1[3882658..3897659]	NA	1	972	MNKLISAVFAAGAVVLGSPAAHAAGYPEKPVTMIVPFVPGGSSDITGRSVTPALAKILGQTFVVENKPGANSAIGAQALARSTPDGYTMMVGSIGTFAINEALYKNLSYNPSKDFTYLTQAVRNPNVLVAATSFPASTVAELVDYAKKNPNRVSYASSGTGSSDHLSAVLFRQRTQSTGVDVPYKGGGAAIADLIGGQVNVSFQNLGAVQNHIKAGKLKALAITGDTRATDLPDVPTLAEAGIKDMVVYSWQGFAVPKGTPQPVVDKLAEALRSALREPQTQKTLQGLGFEVVANTPQQFSDFQQAEVKRWKDVIQKANIQLE	0	8056	9028	9	NA	NA	NA	no_plot	217203	Achromobacter spanius	TRUE	NA	NA	217203	Achromobacter spanius	222	Achromobacter	506	Alcaligenaceae	80840	Burkholderiales	28216	Betaproteobacteria	1224	Proteobacteria	2	Bacteria	131567	cellular organisms
309	NZ_CP023270.1[3882658..3897659]	Achromobacter spanius	217203	2-hydroxyacid dehydrogenase_1	2-hydroxyacid dehydrogenase	2-hydroxyacid dehydrogenase	WP_105239505.1	309#WP_105239505.1#NZ_CP023270.1[3882658..3897659]	NA	1	957	MTTKQRIIQVGSLAGSPSANKRLADGYDVIELWKYPDRKAALAEHGKGVTAVVTSANFGANAELINALPDLKAICSWGVGYETIDVDAARKRGVLVSNTPDVLTDCVADLAWGLLIAGARRMGQGERFVRAGQWGQVHGSIPLGLRVSGKKLGIVGLGRIGEAIAKRGTGFDMDVRYHNRRKRDDVDFGYEASLTDLAKWADFLIVATVGGPSTRHLVNREVLEALGPKGIIVNIARGPVIDEAALVTALEDGKLGCAALDVFEHEPKVPEALIKSDKAVLLPHIGSATEETRLAMENMMLENLQSFFETGRVITPVE	0	9161	10118	10	NA	NA	NA	no_plot	217203	Achromobacter spanius	TRUE	NA	NA	217203	Achromobacter spanius	222	Achromobacter	506	Alcaligenaceae	80840	Burkholderiales	28216	Betaproteobacteria	1224	Proteobacteria	2	Bacteria	131567	cellular organisms
310	NZ_CP023270.1[3882658..3897659]	Achromobacter spanius	217203	DUF2875 family protein_-1	DUF2875 family protein	DUF2875 family protein	WP_158685882.1	310#WP_158685882.1#NZ_CP023270.1[3882658..3897659]	NA	-1	1461	MLHQRLETLDIVGVGLSLDVYRQGQAWAQLHKQSADQPNALLVGSALPMDPRDYPVSGSRKDLAWGLRKSNALELALKSFPERWPLPTVVVVRDYNPKMDRPRVPPEEMEVALRIMATAERGDAGLHWHRLRQLDNGVICNTDPEAVIESIFLMFERNPDMPALLVYALDSFNLRAALSSKNIRLNDISPRGERTPQTPTDAVVALVVARPERLAWLREFAKYTKEKSDSIDPAFIGWERSPRQAFKPTTFFPEPITRRGFEQWDHMKVLARLHRPVTVSLHAKDDADVLLKNPERDQAIASGWDQAITALGSTPTRAFFDTGKLSGGIAQLAPALQRVQHPLDLLDSTQSYDLSQRVGDTGAASPFVGLALATMASYLNADSSLVVPWRRTDRATFIG…	0	10260	11721	11	NA	NA	NA	no_plot	217203	Achromobacter spanius	TRUE	NA	NA	217203	Achromobacter spanius	222	Achromobacter	506	Alcaligenaceae	80840	Burkholderiales	28216	Betaproteobacteria	1224	Proteobacteria	2	Bacteria	131567	cellular organisms
311	NZ_CP023270.1[3882658..3897659]	Achromobacter spanius	217203	DUF3274 domain-containing protein_-1	DUF3274 domain-containing protein	DUF3274 domain-containing protein	WP_105239507.1	311#WP_105239507.1#NZ_CP023270.1[3882658..3897659]	NA	-1	2331	MYSPPITGKTRALVAPNAPDAYVQKQQPKPCIVILIHGVNDLAGVYDALETGICTGLNERLDHLFTKRGERSPAALNPAGYTSPKDDDGRAPDPDVAYYRRLAAEGKHGGHSRSVVIPFYWGFREEEGRIQKQTTHGEWLDRFGNRLDKAGSKEGGPFANATTTLPDMFGQGFSGKVAGLPANLMFGSPDHPLFPAPSRRYMVLAAQRLAMLVRIIRAYRHPDGRAGEDDTINVVGHSQGNLITLLANAMLHDEGQRPIDGFVLMSPPYSLEETVFERSELGKAQQTTPARVKTLSNIVRFIVDNAHQRPSLADMADATKDSCIGGLRWTGQQCETSIDGDKVSFAERDNRGSVFLYFSPQDQTVGMANVQGIGWQGVGEHASYYWFFDPDASSATTCS…	0	11906	14237	12	NA	NA	NA	no_plot	217203	Achromobacter spanius	TRUE	NA	NA	217203	Achromobacter spanius	222	Achromobacter	506	Alcaligenaceae	80840	Burkholderiales	28216	Betaproteobacteria	1224	Proteobacteria	2	Bacteria	131567	cellular organisms
312	NZ_CP023270.1[3882658..3897659]	Achromobacter spanius	217203	hypothetical protein_-1	hypothetical protein	hypothetical protein	WP_105239508.1	312#WP_105239508.1#NZ_CP023270.1[3882658..3897659]	NA	-1	216	MTTHSRIAAFLSTSALCLGLAAAPSAFAAGAKTGDTKTQAHHKHHKADKSSAKHSAGAAANHKSGATTPTK	0	14568	14784	13	NA	NA	NA	no_plot	217203	Achromobacter spanius	TRUE	NA	NA	217203	Achromobacter spanius	222	Achromobacter	506	Alcaligenaceae	80840	Burkholderiales	28216	Betaproteobacteria	1224	Proteobacteria	2	Bacteria	131567	cellular organisms
313	NZ_CP031417.1[4460512..4476054]	Pseudolabrys taiwanensis	331696	amino acid ABC transporter permease_1	amino acid ABC transporter permease	amino acid ABC transporter permease	WP_115693201.1	313#WP_115693201.1#NZ_CP031417.1[4460512..4476054]	NA	1	614	MIYKLQFGDLLPYWDVLLQGLIFTIVLTVVSTIAGIAVGTACASARTFGPKWLGATVVVYVELIRNTPFIVQLFFIFFGLPAVGVKLPESTAAFIAMAINLGAYSTEIIRAGIEAVPKGHVEAGVSLAMSKWEVLRHVVLKQAFRKVYPALSSQIIIVMLGSAVVSQISAPDLTFAANFVQSRNFRAFEVYLLAALLYLLLAVATRAILRGLGRRLFKAG	1	0	614	1	NA	NA	NA	no_plot	331696	Pseudolabrys taiwanensis	TRUE	NA	NA	331696	Pseudolabrys taiwanensis	556257	Pseudolabrys	335928	Xanthobacteraceae	356	Rhizobiales	28211	Alphaproteobacteria	1224	Proteobacteria	2	Bacteria	131567	cellular organisms
314	NZ_CP031417.1[4460512..4476054]	Pseudolabrys taiwanensis	331696	amino acid ABC transporter permease_1	amino acid ABC transporter permease	amino acid ABC transporter permease	WP_115693202.1	314#WP_115693202.1#NZ_CP031417.1[4460512..4476054]	NA	1	651	MDDFTFWDILSNLLDAMVWTIALSLIAFVSGGIVGLILLFMRTSQVPWLEIPTKLYIEFFQGTPLLMQLFLFFFGVALFGIEVSPWLAAWLALTFWASAFLTEIWRGCVESIPKGQWEASSSLAMSYIEQMRYVILPQAVRIAVAPTVGFSVQVVKGTALASIIGFVELTKAGTMLNNVTFKPFLVYSLVAAIYFCLCFPLSWYAKRLEGRLNVAR	0	617	1268	2	NA	NA	NA	no_plot	331696	Pseudolabrys taiwanensis	TRUE	NA	NA	331696	Pseudolabrys taiwanensis	556257	Pseudolabrys	335928	Xanthobacteraceae	356	Rhizobiales	28211	Alphaproteobacteria	1224	Proteobacteria	2	Bacteria	131567	cellular organisms
315	NZ_CP031417.1[4460512..4476054]	Pseudolabrys taiwanensis	331696	amino acid ABC transporter ATP-binding protein_1	amino acid ABC transporter ATP-binding protein	amino acid ABC transporter ATP-binding protein	WP_115693203.1	315#WP_115693203.1#NZ_CP031417.1[4460512..4476054]	NA	1	729	MSLVSIRDVRKSFGELEVLKGVSLEIAKGDVVAIIGRSGSGKSTLLRCVNGLETYQSGAILADGIEVGGLHTKLRELRRHVGMVFQQFNLFPHLTAAENVMLAPMVVNKVPKKEVRALAAEMLAKVGLSDKMDSYPSQLSGGQQQRVAIARALAMRPKVLLCDEITSALDPELVNEVLRVVEQLAREGMTLILVTHEMRFARDVGTSLVFMHHGKVHEQGPPKEVFAAPKTPELAQFIGSIN	0	1254	1983	3	NA	NA	NA	no_plot	331696	Pseudolabrys taiwanensis	TRUE	NA	NA	331696	Pseudolabrys taiwanensis	556257	Pseudolabrys	335928	Xanthobacteraceae	356	Rhizobiales	28211	Alphaproteobacteria	1224	Proteobacteria	2	Bacteria	131567	cellular organisms
316	NZ_CP031417.1[4460512..4476054]	Pseudolabrys taiwanensis	331696	oxalate/formate MFS antiporter_-1	oxalate/formate MFS antiporter	oxalate/formate MFS antiporter	WP_115693204.1	316#WP_115693204.1#NZ_CP031417.1[4460512..4476054]	NA	-1	1305	MPNGVARPLGSSLTRERWTQLIAGVICMIMIANLQYGWTLFVQPIQQRHGWSVASIQLAFSIFVALETWLTPLEGWIVDRLGPQTGPKLMVAFGGLMIAAGWIVNSKADTLTMLYLGAVLSGIGGGAVYATGVGQAVKWFPDRRGLAVGLTAAGFGAGAALTVVPIRSVIASSGYETAFFWFGLVQGAVVFLLAWLLRAPHAEEIKTMTMLAPPKVVQSSKSYKPTEMLKTPVFWLLYVMFVLVSASGLMATAQIALIAKDFNVANTAILFGATALSVALIVDNVCNGAARPLFGWISDHIGREYTMAIAFGLGAVSYWLLGSMGTAPWAFVVFAALIFLTWGEIFSLFPSTCTDSFGPKFATVNLSLLYTAKGASAFLVPVANMIKASTGGWHAVFIV…	0	2036	3341	4	NA	NA	NA	no_plot	331696	Pseudolabrys taiwanensis	TRUE	NA	NA	331696	Pseudolabrys taiwanensis	556257	Pseudolabrys	335928	Xanthobacteraceae	356	Rhizobiales	28211	Alphaproteobacteria	1224	Proteobacteria	2	Bacteria	131567	cellular organisms
317	NZ_CP031417.1[4460512..4476054]	Pseudolabrys taiwanensis	331696	pyrimidine 5'-nucleotidase_-1	pyrimidine 5'-nucleotidase	pyrimidine 5'-nucleotidase	WP_115693205.1	317#WP_115693205.1#NZ_CP031417.1[4460512..4476054]	NA	-1	711	MNTPSTPRTFDHVESWVFDLDNTLYPHHLNLWHQVDERIRSYVADFLKISKEDAFRLQKDYYKRYGTTMRGLMAEHGMHPDDYLEYVHQIDHSPLTPNPRLGDAIEKLPGRKLILTNGTRKHAQNVLKRLEIDHHFEDVFDIAAADLDPKPLPQVYERFLKRHAVDPTKAAMFEDLARNLEVPHRLGMATVLVVPEGQREVFRESWELEGRDAPHIDYVTENIVVFIERLLATLRL	0	3677	4388	5	NA	NA	NA	no_plot	331696	Pseudolabrys taiwanensis	TRUE	NA	NA	331696	Pseudolabrys taiwanensis	556257	Pseudolabrys	335928	Xanthobacteraceae	356	Rhizobiales	28211	Alphaproteobacteria	1224	Proteobacteria	2	Bacteria	131567	cellular organisms
318	NZ_CP031417.1[4460512..4476054]	Pseudolabrys taiwanensis	331696	acetylglutamate kinase_-1	acetylglutamate kinase	acetylglutamate kinase	WP_115693206.1	318#WP_115693206.1#NZ_CP031417.1[4460512..4476054]	NA	-1	885	MSTDPQEQARILSEALPHMQQYDEEIVVVKYGGHAMGEESLARDFAKDIVLLEQTAINPVVVHGGGPQIAAMLKKLGIKSEFAAGLRITDEATVEIVEMVLAGSINKQIVSHINAAGGKAVGLCGKDGNMVQAKKVTRTVIDPDSNIEKVVDLGFVGEPDKVDLTILNQIIGREMIPVLAPVATSAQGGTFNVNADTFAGAIAGALKAKRLLLLTDVPGVLDKSKKLIPQLSIADARKLIADGTISGGMIPKVETCIYALDQGVEGVVIMDGKVPHAVLLELLTDHGLGTLVHR	0	4454	5339	6	NA	NA	NA	no_plot	331696	Pseudolabrys taiwanensis	TRUE	NA	NA	331696	Pseudolabrys taiwanensis	556257	Pseudolabrys	335928	Xanthobacteraceae	356	Rhizobiales	28211	Alphaproteobacteria	1224	Proteobacteria	2	Bacteria	131567	cellular organisms
319	NZ_CP031417.1[4460512..4476054]	Pseudolabrys taiwanensis	331696	DUF423 domain-containing protein_-1	DUF423 domain-containing protein	DUF423 domain-containing protein	WP_115693207.1	319#WP_115693207.1#NZ_CP031417.1[4460512..4476054]	NA	-1	366	MEPILLALAGLMGACGVVLAAAGAHGKPGAGLDSAGYLLLLHAAAVIAAAVAARAGLLVRPIALVTLCGFVVGAGLFAADVAARAYLGHRLFPMAAPTGGTILIVSWLVLAAAALAALRSS	0	5411	5777	7	NA	NA	NA	no_plot	331696	Pseudolabrys taiwanensis	TRUE	NA	NA	331696	Pseudolabrys taiwanensis	556257	Pseudolabrys	335928	Xanthobacteraceae	356	Rhizobiales	28211	Alphaproteobacteria	1224	Proteobacteria	2	Bacteria	131567	cellular organisms
320	NZ_CP031417.1[4460512..4476054]	Pseudolabrys taiwanensis	331696	FAD-dependent monooxygenase_-1	FAD-dependent monooxygenase	FAD-dependent monooxygenase	WP_115693208.1	320#WP_115693208.1#NZ_CP031417.1[4460512..4476054]	NA	-1	1194	MANSKPNVVIVGGGIGGLFAANALIAQGVNVSVYEQAPALGEVGAGVYLTPNSVRHLERLGFGPAVEKWGARVGPNSHYFRDDGTSIAPVQVTDSSGWNATFGMHRADFVNFLAAALPKNAVNTGHRCVGFTQEGGKARVTFANGASTEADIVIGADGIHSELRPHVFPPSTPVFSSTSAYRGTVPHERVPDWPVDRWQMWLGKGKHFLVFPLRAGKLINFVGFVPADQEMKESWSAPGDPDALRRDFAGWDPRVEKLLAQVDKTFRWALYDREPLPTWTKGRLTLLGDAAHPMLPHLGQGANQSIEDGMALATILARSDSQSIPAALEAYERLRRERVAQVQRGARENGLRYDGVSGFADLAKRDAEIAAHANFRKKLYDFDVVPQAEEAALALAS	0	5822	7016	8	NA	NA	NA	no_plot	331696	Pseudolabrys taiwanensis	TRUE	NA	NA	331696	Pseudolabrys taiwanensis	556257	Pseudolabrys	335928	Xanthobacteraceae	356	Rhizobiales	28211	Alphaproteobacteria	1224	Proteobacteria	2	Bacteria	131567	cellular organisms
321	NZ_CP031417.1[4460512..4476054]	Pseudolabrys taiwanensis	331696	tripartite tricarboxylate transporter substrate binding protein_1	tripartite tricarboxylate transporter substrate binding protein	tripartite tricarboxylate transporter substrate binding protein	WP_115693209.1	321#WP_115693209.1#NZ_CP031417.1[4460512..4476054]	NA	1	972	MHRAVCAALALTLAIASFAGGAHAQAYPDRPVKIVVPFPAGGTADAVPRLVADWLSKKWGQPVLIENRTGAAGNIGAETVFRAEPDGYTLLSAPPPPLVINQSLYPKLGYDANKFDPIIVIAQVPNGLIVNPDKIKANTVAEFIDYVKQNPGKVTSATQGNGTTSHLTSELFALMAKVKFSNVPYRGSAPALQDLLGGNVDVMFDNLGVSLPLVQAGKLKLLAVASAKRMPALPNVPTLAETLPGFEAVAWYGIVAPPGTPKPIIDKINADVNEALAQPEMKDHLRKLSAEVFGGSVQETAKYMREEVARWGGVIKAADIKVQ	0	7222	8194	9	tph_c	NA	NA	no_plot	331696	Pseudolabrys taiwanensis	TRUE	NA	NA	331696	Pseudolabrys taiwanensis	556257	Pseudolabrys	335928	Xanthobacteraceae	356	Rhizobiales	28211	Alphaproteobacteria	1224	Proteobacteria	2	Bacteria	131567	cellular organisms
322	NZ_CP031417.1[4460512..4476054]	Pseudolabrys taiwanensis	331696	YihA family ribosome biogenesis GTP-binding protein_-1	YihA family ribosome biogenesis GTP-binding protein	YihA family ribosome biogenesis GTP-binding protein	WP_115693210.1	322#WP_115693210.1#NZ_CP031417.1[4460512..4476054]	NA	-1	651	MTDTADFTRNEIETGRKLFSTDWQFFAAAGTSESLPPMRGIEIAFAGRSNVGKSSLINALTGRKALARTSRTPGRTQELIFFSGGQDLTIVDMPGYGYAAAAKAKIAAWTKMIHNYLIGRRNLARVYVLIDARHGLKDTDDPTLDALGSAAVSHQIVLTKCDAVKKSELAGRIAEVEAALAKRPAAFPGVLVTSSEDGSGIPELRAAIARLLMERR	0	8332	8983	10	NA	NA	NA	no_plot	331696	Pseudolabrys taiwanensis	TRUE	NA	NA	331696	Pseudolabrys taiwanensis	556257	Pseudolabrys	335928	Xanthobacteraceae	356	Rhizobiales	28211	Alphaproteobacteria	1224	Proteobacteria	2	Bacteria	131567	cellular organisms
323	NZ_CP031417.1[4460512..4476054]	Pseudolabrys taiwanensis	331696	membrane protein insertase YidC_-1	membrane protein insertase YidC	membrane protein insertase YidC	WP_115693211.1	323#WP_115693211.1#NZ_CP031417.1[4460512..4476054]	NA	-1	1836	MTDNKNTILAIVLSALVLIGWQYFVGMPQEKARQEQLQQQEQKQAAQPQQPGQPVQAPPQGAPNGQTPQVPGGPTTAPATSLSRAAALAASPRVAIKTDSLEGSIALKGGRIDDLALIKFRETVDPKSPPIFLLSPSGTGDPFYAEFGWTTGGGSNVKVPTADTVWTQSGSGALAVGKPVTLTWDNGEGLEFRRTIAVDDKYVFTLKDEVVNKGGAPVTLYPYGLISRHGTPHTAGYYILHEGLIGVLGDQGLQEYTYKNIDDKKTVNFDVTNGWLGITDKYWAATLLPDTNARLKARFSTGTLGTLKTYQTDYLLDAVTVAPGATGAADARLFAGAKEVAVVNDYEKQLKLNRFDLLIDWGWFYFITKPLFMVIDYLYRVVGNFGVAILIVTLLIKLI…	0	9144	10980	11	NA	NA	NA	no_plot	331696	Pseudolabrys taiwanensis	TRUE	NA	NA	331696	Pseudolabrys taiwanensis	556257	Pseudolabrys	335928	Xanthobacteraceae	356	Rhizobiales	28211	Alphaproteobacteria	1224	Proteobacteria	2	Bacteria	131567	cellular organisms
324	NZ_CP031417.1[4460512..4476054]	Pseudolabrys taiwanensis	331696	ribonuclease P protein component_-1	ribonuclease P protein component	ribonuclease P protein component	WP_115693212.1	324#WP_115693212.1#NZ_CP031417.1[4460512..4476054]	NA	-1	351	MERLRQRADFLAAATGTKVPAAAFVLQARKRADEGPVRIGFTVSKKVGNAVERNRVRRRLREIVRLAPSDGLRSGHDYVVIGRRAALTVPFERIAHDFRGALRRAHAGRNGDTGSR	0	10976	11327	12	NA	NA	NA	no_plot	331696	Pseudolabrys taiwanensis	TRUE	NA	NA	331696	Pseudolabrys taiwanensis	556257	Pseudolabrys	335928	Xanthobacteraceae	356	Rhizobiales	28211	Alphaproteobacteria	1224	Proteobacteria	2	Bacteria	131567	cellular organisms
325	NZ_CP031417.1[4460512..4476054]	Pseudolabrys taiwanensis	331696	50S ribosomal protein L34_-1	50S ribosomal protein L34	50S ribosomal protein L34	WP_115693213.1	325#WP_115693213.1#NZ_CP031417.1[4460512..4476054]	NA	-1	135	MKRTYQPSKLVRKRRHGYRARMATKGGQKVVAARRARGRKRLSA	0	11361	11496	13	NA	NA	NA	no_plot	331696	Pseudolabrys taiwanensis	TRUE	NA	NA	331696	Pseudolabrys taiwanensis	556257	Pseudolabrys	335928	Xanthobacteraceae	356	Rhizobiales	28211	Alphaproteobacteria	1224	Proteobacteria	2	Bacteria	131567	cellular organisms
326	NZ_CP031417.1[4460512..4476054]	Pseudolabrys taiwanensis	331696	response regulator transcription factor_1	response regulator transcription factor	response regulator transcription factor	WP_115694539.1	326#WP_115694539.1#NZ_CP031417.1[4460512..4476054]	NA	1	375	MSGDGRVMILASSRQCSIQPPMRESREIEVLPAKNGGGCASSRLHPRLSGRETQILDGLVRGQTNKVIARACDITEATVKVHMKSILRKIKVTNRTQAAIWALEHGYSADEIKDRLLRAAEGAV	0	12262	12637	14	NA	NA	NA	no_plot	331696	Pseudolabrys taiwanensis	TRUE	NA	NA	331696	Pseudolabrys taiwanensis	556257	Pseudolabrys	335928	Xanthobacteraceae	356	Rhizobiales	28211	Alphaproteobacteria	1224	Proteobacteria	2	Bacteria	131567	cellular organisms
327	NZ_CP031417.1[4460512..4476054]	Pseudolabrys taiwanensis	331696	FAD-dependent oxidoreductase_1	FAD-dependent oxidoreductase	FAD-dependent oxidoreductase	WP_115693214.1	327#WP_115693214.1#NZ_CP031417.1[4460512..4476054]	NA	1	1431	MAETLTPDICVIGGGVGGLSAATAAAAFGVPTVLIERDVLGGQHLNTGCVPTTALLAAAKRAAAARDSHAFGVKASGVEVDFAVIHRRIHDAIARLSPNGSVERLAGFGVRVIKGEAMFKDRRTVTVGDDVEIRARRFVLATGSRPVVPSIPGLDTGPYLTTDTVFALEQLPARLIIIGAGPAGVELAQGFRRLGSDVTLLGTGEALADSDPEAASIVLAQLEREGIVVKTGVALVHVSHISHSVALTIEIDGRQEMVEGSHLLIAADRKPATEGLGLDAARIKHDVSGIRVNGKLRTSNGRVYAIGDVAAGQPRCASAATYHAGLAVRNALFRLSPRVADSAVPSVVFTEPELARAGLTETQARQRKLKYRILRSPYHDNDRAQAEGRTHGQIKVIVD…	0	12832	14263	15	NA	NA	NA	no_plot	331696	Pseudolabrys taiwanensis	TRUE	NA	NA	331696	Pseudolabrys taiwanensis	556257	Pseudolabrys	335928	Xanthobacteraceae	356	Rhizobiales	28211	Alphaproteobacteria	1224	Proteobacteria	2	Bacteria	131567	cellular organisms
328	NZ_CP031417.1[4460512..4476054]	Pseudolabrys taiwanensis	331696	HAMP domain-containing histidine kinase_1	HAMP domain-containing histidine kinase	HAMP domain-containing histidine kinase	WP_115693215.1	328#WP_115693215.1#NZ_CP031417.1[4460512..4476054]	NA	1	1266	MSEPAGEASVQSAPRRGRPARLGLSGKLLFLTVLFVMLAEILIYVPSIANFRLNWLNDRLAAAHTAALVLDAAPSGMVPESLAKQILDSIGARAVAIKMGSQRRLLAASDLPSQIKTDIDMRDIRWWRAIAHAFKTLFIDEPDDLMRVVGPAPMRGDFLEIVLDEGPLRRAMVTFSINILLLSLAISGISAMLVFFALHYLLVRPMERLTSNMVAFRADPENPARIIDSSGRNDEIGTAEEELAAMQRELATMLHQQSRLAALGLAVSKINHDLRNLLASAQLFSDQLSTLPDPKVQRFAPKLMRAIERAIAFCQSTLSYGGAHEPPPERKTIQLEQLIDEVHEALGLGLDVPIRWIVAVERGLTVDADHDQLFRVLVNITRNAMQALDARGTRDPARD…	1	14277	15543	16	NA	NA	NA	no_plot	331696	Pseudolabrys taiwanensis	TRUE	NA	NA	331696	Pseudolabrys taiwanensis	556257	Pseudolabrys	335928	Xanthobacteraceae	356	Rhizobiales	28211	Alphaproteobacteria	1224	Proteobacteria	2	Bacteria	131567	cellular organisms
329	NZ_CP043046.1[1435101..1450299]	Pigmentiphaga aceris	1940612	3-phosphoserine/phosphohydroxythreonine transaminase_1	3-phosphoserine/phosphohydroxythreonine transaminase	3-phosphoserine/phosphohydroxythreonine transaminase	WP_148813668.1	329#WP_148813668.1#NZ_CP043046.1[1435101..1450299]	NA	1	243	MTRPFNFSAGPAVLPDTVLAQAASEMLDWHGSGMSVMEMSHRGKHFTQICDEAEADLRELMKVPADYAVLFMQGGGLAENAIVPMNLIATKPSQEADFLITGSWSSKSFKEAQRYGDIKVAATSADAARIGDRDQAAFTYVPDASTWKVRPDASYLHLCSNETIDGVEFLDWPDLAALGAPDVPLVVDASSHILSRPIDINRVGVLFGGAQKNIGPAGLTIVIARRDLLGKALPVCPSAFDYSIVDKNDSRYNTPPTYSIYIAGLVFKWLKAQGGVEGIEAANRAKADLLYGYLDASAFYRNAVHPAVRSRMNVPFYLNNDALNADFLKGADEAGLLQLKGHKSVGGMRASIYNAMPLAGVQALVDYLKHFEQRHG	1	0	243	1	NA	NA	NA	no_plot	1940612	Pigmentiphaga aceris	TRUE	NA	NA	1940612	Pigmentiphaga aceris	152267	Pigmentiphaga	506	Alcaligenaceae	80840	Burkholderiales	28216	Betaproteobacteria	1224	Proteobacteria	2	Bacteria	131567	cellular organisms
330	NZ_CP043046.1[1435101..1450299]	Pigmentiphaga aceris	1940612	prephenate dehydratase_1	prephenate dehydratase	prephenate dehydratase	WP_148813670.1	330#WP_148813670.1#NZ_CP043046.1[1435101..1450299]	NA	1	1080	MDEALLKQLQPLRERIDAIDVEILGLLNERARTAQHVGEIKKDVNGPVLRPEREAQVIRRLQQHNPGPLPALAVSAIWTEVMSACRCLEKQGSVAYLGPQGTFSEHAAFSHFGQSVQGIPCASIDEVFRAVEAGRADFGMVPAENSTEGAVSRTLDLLLTTSVRIIGERAMPIRHHLLTSSGTLDGVTSVRAHPQALAQCQDWLTQNHPHLARESVASNAEAARQASIDPTIAAIAGEPAALMWQLQSVAADIQDDPHNRTRFYAIGRLETWPSGSDKTSMILAVPNRAGAVYQMLAPLAENGVSMTRFESRPARTAEWEYFFYVDIEGHQLAPQVASALAALKSQAAFFKVLGSYPAA	0	235	1315	2	NA	NA	NA	no_plot	1940612	Pigmentiphaga aceris	TRUE	NA	NA	1940612	Pigmentiphaga aceris	152267	Pigmentiphaga	506	Alcaligenaceae	80840	Burkholderiales	28216	Betaproteobacteria	1224	Proteobacteria	2	Bacteria	131567	cellular organisms
331	NZ_CP043046.1[1435101..1450299]	Pigmentiphaga aceris	1940612	prephenate dehydrogenase/arogenate dehydrogenase family protein_1	prephenate dehydrogenase/arogenate dehydrogenase family protein	prephenate dehydrogenase/arogenate dehydrogenase family protein	WP_148813672.1	331#WP_148813672.1#NZ_CP043046.1[1435101..1450299]	NA	1	915	MHAMKTTSSQPLIPVLAVVGVGLIGGSFISALRHAGQVGHVIGVGRNAQTLARAQALGLIDEAASPEDAAARADLILLATPVGALPAVFAAIAPHLRPGTVVTDAGSTKQDVIAAAYKGLGARIDQFVPAHPIAGSDRQGPEAADAALYRGRTVILAPLAESRPADVELVRSVWRHCGAAVVQLTAETHDAVFASVSHLPHLLAFAYMNQVAAAPDAATRLALAGSGFRDFTRIAGSSPEMWRDIFISNRPALLAELEQVQAMLDTYRDALLTDDVARLEGLLGNASDTRRTWLPVAPTDFLDL	0	1364	2279	3	NA	NA	NA	no_plot	1940612	Pigmentiphaga aceris	TRUE	NA	NA	1940612	Pigmentiphaga aceris	152267	Pigmentiphaga	506	Alcaligenaceae	80840	Burkholderiales	28216	Betaproteobacteria	1224	Proteobacteria	2	Bacteria	131567	cellular organisms
332	NZ_CP043046.1[1435101..1450299]	Pigmentiphaga aceris	1940612	3-phosphoshikimate 1-carboxyvinyltransferase_1	3-phosphoshikimate 1-carboxyvinyltransferase	3-phosphoshikimate 1-carboxyvinyltransferase	WP_148813674.1	332#WP_148813674.1#NZ_CP043046.1[1435101..1450299]	NA	1	1368	MSLSTSSARPAFLDLQPVRRARGEIVLPGSKSISNRVLLLAALAAGSTTVHGLLDSDDTRVMLDGLRKLGVQVKAGDAADEYVVTGVPRFPGEKADIFLGNAGTAFRPLTAALALMGGDYQLHGVPRMHERPIGDLVDALRGLGANVTYQGNEGYPPLAIGQGKLDLSKPVRVKGNVSSQFLTALLLAAPLATASTGSDFHLEVDGELISKPYVDMTIKLMARFGVTVSRDGWQRFSVPANARYVSPGEIWVEGDASSASYFLALGAIGGGPVRVRGVGRDSIQGDVSFADTLAELGVQVLQGDDWIETCGVSVANGEKLRAFDTDFNLIPDAAMTAAVLALYADGPCRLRNIGSWRVKETDRIHAMHTELVKLGATVESGPDWLTVTPPAADAWRTAE…	0	2282	3650	4	NA	NA	NA	no_plot	1940612	Pigmentiphaga aceris	TRUE	NA	NA	1940612	Pigmentiphaga aceris	152267	Pigmentiphaga	506	Alcaligenaceae	80840	Burkholderiales	28216	Betaproteobacteria	1224	Proteobacteria	2	Bacteria	131567	cellular organisms
333	NZ_CP043046.1[1435101..1450299]	Pigmentiphaga aceris	1940612	(d)CMP kinase_1	(d)CMP kinase	(d)CMP kinase	WP_148813676.1	333#WP_148813676.1#NZ_CP043046.1[1435101..1450299]	NA	1	678	MKPSAIPVITIDGPTASGKGTVACRVAAVLGWHVLDSGALYRLTALTCIKRGIGIHQVGQIADAAAYLDVVFKGDEILMHGQDVTAAIRQEAVGEFASRVAALEPVRAALLARQREFRQAPGLVADGRDMGTVVFPDAHLKVFLIASARARAERRYKQLIEKGFSANIDEISRDLEARDARDSQRLHAPLTPAQDALRLDSSALDVDQTVNQVLDWYKDRTQAVQ	0	3646	4324	5	NA	NA	NA	no_plot	1940612	Pigmentiphaga aceris	TRUE	NA	NA	1940612	Pigmentiphaga aceris	152267	Pigmentiphaga	506	Alcaligenaceae	80840	Burkholderiales	28216	Betaproteobacteria	1224	Proteobacteria	2	Bacteria	131567	cellular organisms
334	NZ_CP043046.1[1435101..1450299]	Pigmentiphaga aceris	1940612	30S ribosomal protein S1_1	30S ribosomal protein S1	30S ribosomal protein S1	WP_148813678.1	334#WP_148813678.1#NZ_CP043046.1[1435101..1450299]	NA	1	1710	MSSVSENQFAGEESFASMFEESIKKQEMKSGEVITAEVVRIDHNFVVVNAGLKSEALIPLEEFLNDQGELEVAEGDFVSVAIDALENGYGDTVLSRDRAKRLAAWLQLEQALESGELVTGTITSKVKGGLTVMTNAIRAFLPGSLVDMRPVKDTTPYEGKTLEFKVIKLDRKRNNVVLSRRAVLEANMGEERQKLLETLHEGAIVNGVVKNITDYGAFVDLGGIDGLLHITDLAWRRVRHPSEVLTVGQEIQAKVLKFDQEKNRVSLGVKQLGEDPWVGLSRRYPQSTRLFGKVTNLTDYGAFVEVEAGIEGLVHVSEMDWTNKNVDPKKVVTVGEEVEVMVLEIDEDRRRISLGMKQCRANPWEDFSANHKRGDKVRGAIKSITDFGVFVGLPGGIDG…	0	4697	6407	6	NA	NA	NA	no_plot	1940612	Pigmentiphaga aceris	TRUE	NA	NA	1940612	Pigmentiphaga aceris	152267	Pigmentiphaga	506	Alcaligenaceae	80840	Burkholderiales	28216	Betaproteobacteria	1224	Proteobacteria	2	Bacteria	131567	cellular organisms
335	NZ_CP043046.1[1435101..1450299]	Pigmentiphaga aceris	1940612	integration host factor subunit beta_1	integration host factor subunit beta	integration host factor subunit beta	WP_148818991.1	335#WP_148818991.1#NZ_CP043046.1[1435101..1450299]	NA	1	306	MTKSELIARLAARYPQLVAKDADYAVKTILDAMAQSLSEGHRIEIRGFGSFSLSKRPPRIGRNPKSGERVLVPEKRVPHFKAGKELRERVDGPLDSAASTG	0	6458	6764	7	NA	NA	NA	no_plot	1940612	Pigmentiphaga aceris	TRUE	NA	NA	1940612	Pigmentiphaga aceris	152267	Pigmentiphaga	506	Alcaligenaceae	80840	Burkholderiales	28216	Betaproteobacteria	1224	Proteobacteria	2	Bacteria	131567	cellular organisms
336	NZ_CP043046.1[1435101..1450299]	Pigmentiphaga aceris	1940612	tripartite tricarboxylate transporter substrate binding protein_1	tripartite tricarboxylate transporter substrate binding protein	tripartite tricarboxylate transporter substrate binding protein	WP_148813679.1	336#WP_148813679.1#NZ_CP043046.1[1435101..1450299]	NA	1	1014	MKLRSTDITRRRVLALLVHSGLATAGLGAATISSAHAQDFPTKPITIVVPFSAGGTTDILARIVAQNLQAELKQPIVVDNRAGAAGNIGAQAVARAQPDGYTLLLGTVGTHAINGALYKKLGFDPVKDFAPLTRVANVPNLLVTNPEQPYKTVQELIAYAKANPGKVNFGSSGAGTSIHLSGELFKRMAGVDIQHVPYKGSAPALSDLLGNQIGIMFDNMPSSISHVRSGRLRPLAVTTAKRSPELPDVPTVAEAGVPGYEASSWFGMFAPANTPAPVLARLHDALIKALSDPGVRQRIAEQGGEPVTETPAQFADFIAAESKKWGEVVKQSGASVD	0	7036	8050	8	tph_c	NA	NA	no_plot	1940612	Pigmentiphaga aceris	TRUE	NA	NA	1940612	Pigmentiphaga aceris	152267	Pigmentiphaga	506	Alcaligenaceae	80840	Burkholderiales	28216	Betaproteobacteria	1224	Proteobacteria	2	Bacteria	131567	cellular organisms
337	NZ_CP043046.1[1435101..1450299]	Pigmentiphaga aceris	1940612	aldehyde dehydrogenase (NADP(+))_-1	aldehyde dehydrogenase (NADP(+))	aldehyde dehydrogenase (NADP(+))	WP_148813681.1	337#WP_148813681.1#NZ_CP043046.1[1435101..1450299]	NA	-1	1584	MPITGNMLIGASSVRGNLGTLRAIDAVTRADLEPEFGLGGSAEVDRAASLAQAAFDTYRATTPEVRAKFLEAIAQNILDLGDELINRAHQESALPIARLQGERGRTVGQLRMFAQVVRSGHHLTATIDPAQPERKPMPRVDLRLAKIPLGPVAVFGASNFPLAFSVAGGDTASALAAGAPVIVKAHSAHLGTSELVGQAIQKAVADAGLPEGVFSLLIGAGRQLGEALVAHPVIKAVGFTGSRQGGLALVRIANARPEPIPVYAEMSSINPVFLLPGALAARAEKIGQDFVDSLTMGVGQFCTNPGLVVALDSPDLQRFRQAAAEAVVKKGSATMLTPGIFDAYEKGVSQLRSQAGVTSLGEGVEAEAGTWGARPAVFVTDASTFLASHALQDEVFGPS…	0	8270	9854	9	NA	NA	NA	no_plot	1940612	Pigmentiphaga aceris	TRUE	NA	NA	1940612	Pigmentiphaga aceris	152267	Pigmentiphaga	506	Alcaligenaceae	80840	Burkholderiales	28216	Betaproteobacteria	1224	Proteobacteria	2	Bacteria	131567	cellular organisms
338	NZ_CP043046.1[1435101..1450299]	Pigmentiphaga aceris	1940612	5-dehydro-4-deoxyglucarate dehydratase_-1	5-dehydro-4-deoxyglucarate dehydratase	5-dehydro-4-deoxyglucarate dehydratase	WP_148813683.1	338#WP_148813683.1#NZ_CP043046.1[1435101..1450299]	NA	-1	915	MTSPQELKQIVSQGLLSFPVTDFDEQGNFRPKTYAERLEWLAPYGATALFAAGGTGEFFSLSHDEYSSVVKTAVDTCANLVPIIAGIGGPTRTAIAYGKEAQRLGAKGVLLLPHYLTEASQDGIARHVEEVCKALDIGVIVYNRANSKLNADQLVGLAERNPNLIGFKDGVGDIESMVRVRRKLGDRFSYLGGLPTAEVYAEAYRALGVPVYSSAVFNFIPKTAMEFYNAVAAGDSATTGRLIDDFFLPYLDIRNRKAGYAVSIVKAGAKLVGHDAGPVRAPLTDLNESELAQLDALIKKLGPQ	0	10079	10994	10	NA	NA	NA	no_plot	1940612	Pigmentiphaga aceris	TRUE	NA	NA	1940612	Pigmentiphaga aceris	152267	Pigmentiphaga	506	Alcaligenaceae	80840	Burkholderiales	28216	Betaproteobacteria	1224	Proteobacteria	2	Bacteria	131567	cellular organisms
339	NZ_CP043046.1[1435101..1450299]	Pigmentiphaga aceris	1940612	FadR family transcriptional regulator_-1	FadR family transcriptional regulator	FadR family transcriptional regulator	WP_148813685.1	339#WP_148813685.1#NZ_CP043046.1[1435101..1450299]	NA	-1	762	MDTSPLVVPPGRPRRKARSLTEEVVNALSEQIRNGEFRPGEKLPTESAIMDAQGVSRTVVREAISRLQAARLVETRHGIGTFVLEAAQDSSFQIDTASILTMLDVMAILELRISLEAEAAGLAANRRSDTHLRQMRQAMTDFDNHIVKRTGNAVSADVAFHLAIASATGNRYFLNILEQLGSTIIPRTRVNSAALAAADQTSYLSQVNREHENIVDAIERRDPEAARAAMRTHLTNSRERLRRAHDAVAQPTA	0	11305	12067	11	NA	NA	NA	no_plot	1940612	Pigmentiphaga aceris	TRUE	NA	NA	1940612	Pigmentiphaga aceris	152267	Pigmentiphaga	506	Alcaligenaceae	80840	Burkholderiales	28216	Betaproteobacteria	1224	Proteobacteria	2	Bacteria	131567	cellular organisms
340	NZ_CP043046.1[1435101..1450299]	Pigmentiphaga aceris	1940612	galactarate dehydratase_1	galactarate dehydratase	galactarate dehydratase	WP_148813687.1	340#WP_148813687.1#NZ_CP043046.1[1435101..1450299]	NA	1	1584	MSLAPISVPRAPLRIQIHPADNVAIVANDGGLPAGTVFSDGLVLRDAVPQGHKLALVDLAAGDPVLRYNVVIGYAARDLPQGSWVSERVMEMPAAPTLDNLPIATRVAPELPPLEGFFFDGYRNADGSVGTRNILAITTTVQCVAGVVEHAVRRIKTELLPRYPNVDDVVGLEHTYGCGVAIDAPDAVIPIRTLRNISLNPNFGGTAMMVSLGCEKLQPERLLPAGTIPIRDGVAMTVGAGVDTVRLQDDSHVGFESMITSIMQTAERHLAILDARRREPCPVSELVVGVQCGGSDAFSGVTANPAVGFATDLLVRAGASVLFSETTEVRDGIDQLTSRAANPDVAAALIREMDWYDRYLDRGRVDRSANTTPGNKAGGLSNIVEKAMGSIVKSGSGAI…	0	12281	13865	12	NA	NA	NA	no_plot	1940612	Pigmentiphaga aceris	TRUE	NA	NA	1940612	Pigmentiphaga aceris	152267	Pigmentiphaga	506	Alcaligenaceae	80840	Burkholderiales	28216	Betaproteobacteria	1224	Proteobacteria	2	Bacteria	131567	cellular organisms
341	NZ_CP043046.1[1435101..1450299]	Pigmentiphaga aceris	1940612	DUF1049 domain-containing protein_1	DUF1049 domain-containing protein	DUF1049 domain-containing protein	WP_148813688.1	341#WP_148813688.1#NZ_CP043046.1[1435101..1450299]	NA	1	330	MRYFIWILRLAVFVVVLLFALKNTDRVTVRFFVDTLTTDIPLIVVMLACFVAGTLFGLLLTVPASLRRRRELAALRRDLERARAEAVVVPAAATTAPPSSDVVLPMHPL	0	14094	14424	13	NA	NA	NA	no_plot	1940612	Pigmentiphaga aceris	TRUE	NA	NA	1940612	Pigmentiphaga aceris	152267	Pigmentiphaga	506	Alcaligenaceae	80840	Burkholderiales	28216	Betaproteobacteria	1224	Proteobacteria	2	Bacteria	131567	cellular organisms
342	NZ_CP043046.1[1435101..1450299]	Pigmentiphaga aceris	1940612	lipopolysaccharide assembly protein LapB_1	lipopolysaccharide assembly protein LapB	lipopolysaccharide assembly protein LapB	WP_148813690.1	342#WP_148813690.1#NZ_CP043046.1[1435101..1450299]	NA	1	763	MDFEPWLLIVIPLLFGLGWIAARVDIRQMLSETRNLPDSYFRGLNFLLNEKPDQAIDAFIEVAKLNPETIELHFALGSLFRRRGEIERAIRVHQNLLQRTDLPSLQREQALHELAQDYLRAGLLDRAEAAFEQLKATRFAPEALRALIRVHETERDWPQAILAAQALQGLVDEPVPQAVHFHCEQAAAAMIATPPELDAAHAALDAASHASRQRNAAPDAPTVPHVRVSIMRAELAMLENNPVACRVHLEAVLAHAPEYAGLVAAKLLDNHRVDGTEADGIAMLEAHYARYPSLDVFNAIFQARRTVYGIADAWVFARAAMQRNPSLLGLDRLLEAQLAAPARADGVPAPHAVAVVDDVALMRSLIHKHTQRMDRYICRSCGFKARRFHWQCPGCNAWE…	1	14436	15199	14	NA	NA	NA	no_plot	1940612	Pigmentiphaga aceris	TRUE	NA	NA	1940612	Pigmentiphaga aceris	152267	Pigmentiphaga	506	Alcaligenaceae	80840	Burkholderiales	28216	Betaproteobacteria	1224	Proteobacteria	2	Bacteria	131567	cellular organisms
343	NZ_CP052851.1[3899339..3914728]	Bordetella parapertussis	519	MFS transporter_1	MFS transporter	MFS transporter	WP_003814298.1	343#WP_003814298.1#NZ_CP052851.1[3899339..3914728]	NA	1	465	MSTSDPTPSRPTHGPELSGAGYLCLLAMLNHMALTGGRITVSLTALKLGLSTFTVGMLVAVFAVLPMFASVHAGRWVDKIGVVRPLVIGSSLVTFGTALPFVSQTQAALLVASCCIGIGFMLHQVATQDLLGHAEPRERLRNFSWMSLALAASGFSGPLIAGLAIDHLGTRLAFGMLALGPMLSLVGLYLLRQPLRTMNGALTGGSNRPAERRRITELLAVPPLRRILMVNTILSGAWDTHLFVVPIFGVAIGLSATTIGVILAAFAAATFVIRLVLPFIQTRVRSWTLVRAAMATAAIDFLLYPFFTDVGMLIGLSFVLGLALGCCQPSMLSLLHQYSPPGRAAEAVGLRMALINASQVSLPLTFGALGAVIGVAPLFWAYALALVAGGWANRNPPQE…	1	0	465	1	NA	NA	NA	no_plot	519	Bordetella parapertussis	TRUE	NA	NA	519	Bordetella parapertussis	517	Bordetella	506	Alcaligenaceae	80840	Burkholderiales	28216	Betaproteobacteria	1224	Proteobacteria	2	Bacteria	131567	cellular organisms
344	NZ_CP052851.1[3899339..3914728]	Bordetella parapertussis	519	gamma-glutamylcyclotransferase_1	gamma-glutamylcyclotransferase	gamma-glutamylcyclotransferase	WP_010929153.1	344#WP_010929153.1#NZ_CP052851.1[3899339..3914728]	NA	1	660	MNTQSPPSPHDPHGAAALPFRLWTAEERRASLDTALREWRDGEDVWVYGYGSLIWRPDFDFVERRLATLHGHHRALCLWSRVNRGTPECPGLVFGLDRGGSCRGVVYRLAGRQVPDYFPALWDREMSTGAYLPRWLRCATEHGPVNALVFIMNRANPAYIRALPEPELLAIVRRASGRYGPCTEYVVQTAQALRQAGIRDARLEQIARQLEAEVHPLGV	0	461	1121	2	NA	NA	NA	no_plot	519	Bordetella parapertussis	TRUE	NA	NA	519	Bordetella parapertussis	517	Bordetella	506	Alcaligenaceae	80840	Burkholderiales	28216	Betaproteobacteria	1224	Proteobacteria	2	Bacteria	131567	cellular organisms
345	NZ_CP052851.1[3899339..3914728]	Bordetella parapertussis	519	pyridoxamine 5'-phosphate oxidase_1	pyridoxamine 5'-phosphate oxidase	pyridoxamine 5'-phosphate oxidase	WP_003814302.1	345#WP_003814302.1#NZ_CP052851.1[3899339..3914728]	NA	1	633	MSVSDLRQSYEKGVLVEEQAAASPFQQFARWFDEAVAARVPEPNAMTLATVNAEGQPSARIVLIKGYDDAGFVFFTNYESRKGLDLDANPRASLLFFWQPLERQVRIEGVIEKVSAAESDEYFHSRPLGSRLGAWASRQSQPITRDELEAREREFRDRYGEHPPRPPHWGGYRLKPNRFEFWQGRPSRLHDRLRYEPDGKQGWTIDRLSP	0	1192	1825	3	NA	NA	NA	no_plot	519	Bordetella parapertussis	TRUE	NA	NA	519	Bordetella parapertussis	517	Bordetella	506	Alcaligenaceae	80840	Burkholderiales	28216	Betaproteobacteria	1224	Proteobacteria	2	Bacteria	131567	cellular organisms
346	NZ_CP052851.1[3899339..3914728]	Bordetella parapertussis	519	flavin reductase family protein_1	flavin reductase family protein	flavin reductase family protein	WP_010929154.1	346#WP_010929154.1#NZ_CP052851.1[3899339..3914728]	NA	1	519	MSAAFPPAFDAAFFRTALGRFATGVTVVTTAGPDGQPVGLTVSSFNSVSLNPPLILWSLARTSSSLAAFERCQRYVVNVLSASQIALARRFATGKTPERFAGLTLAQAPAGTPMLGEGCAAWFECRNRSRYEEGDHIIMVGQVEHCGHSGVPPLVFHAGSFDLTPPHGGASS	0	1854	2373	4	NA	NA	NA	no_plot	519	Bordetella parapertussis	TRUE	NA	NA	519	Bordetella parapertussis	517	Bordetella	506	Alcaligenaceae	80840	Burkholderiales	28216	Betaproteobacteria	1224	Proteobacteria	2	Bacteria	131567	cellular organisms
347	NZ_CP052851.1[3899339..3914728]	Bordetella parapertussis	519	NAD(P)/FAD-dependent oxidoreductase_1	NAD(P)/FAD-dependent oxidoreductase	NAD(P)/FAD-dependent oxidoreductase	WP_010929155.1	347#WP_010929155.1#NZ_CP052851.1[3899339..3914728]	NA	1	1110	MSTDIDCIVIGAGVVGLAIARALAAGGHEVLVAEAAEGIGTGTSSRNSEVIHAGIYYPADSLKARLCVRGKHLLYEYCAARGVPHQRLGKLIVATSDAEASQLDSIARRAGANGVDDLQHIDGAAARRLEPALHCTAALVSPSTGIVDSHALMLAYQGDAENDGAQLVFHTPLIAGRVRPEGGFELDFGGAEPMTLSCRVLINAAGLHAPGLARRIEGIPQDSIPPEYLCKGSYFTLAGRAPFSRLIYPVPQHAGLGVHLTLELGGQAKFGPDTEWITTEDYTLDPRRADVFYAAVRSYWPALPDGALAPGYTGIRPKISGPHEPAADFAIAGPASHGVAGLVNLYGIKSPGLTASLAIAEETLARLAA	0	2383	3493	5	NA	NA	NA	no_plot	519	Bordetella parapertussis	TRUE	NA	NA	519	Bordetella parapertussis	517	Bordetella	506	Alcaligenaceae	80840	Burkholderiales	28216	Betaproteobacteria	1224	Proteobacteria	2	Bacteria	131567	cellular organisms
348	NZ_CP052851.1[3899339..3914728]	Bordetella parapertussis	519	formyltetrahydrofolate deformylase_1	formyltetrahydrofolate deformylase	formyltetrahydrofolate deformylase	WP_003814312.1	348#WP_003814312.1#NZ_CP052851.1[3899339..3914728]	NA	1	855	MQHNDYILTLSCPDRTGIVFRVSGLLFELGCNIRDSQQFGDEETGRFFLRVHFDLPRAAAESALREQFAALANGYDMQWQIHDAHRKARLLIMVSKQGHCLNDLLFRVSSGQLRAEVAAIVSNHNDYASLAASYGIPFHHMPVTPDTKAAQERQVLELVEREQIDLVVLARYMQILSADMCQALAGRAINIHHSFLPSFKGARPYHQAHARGVKIIGATAHYVTSDLDEGPIIEQDIERVDHTMTAADLTQVGSDIESLVLSRAVRSHVEHRILLNRSKTVVFR	0	3539	4394	6	NA	NA	NA	no_plot	519	Bordetella parapertussis	TRUE	NA	NA	519	Bordetella parapertussis	517	Bordetella	506	Alcaligenaceae	80840	Burkholderiales	28216	Betaproteobacteria	1224	Proteobacteria	2	Bacteria	131567	cellular organisms
349	NZ_CP052851.1[3899339..3914728]	Bordetella parapertussis	519	LysR family transcriptional regulator_-1	LysR family transcriptional regulator	LysR family transcriptional regulator	WP_010929156.1	349#WP_010929156.1#NZ_CP052851.1[3899339..3914728]	NA	-1	903	MDLEPRLLRYFIAVAQERNFSRAAQRLHISQPPLSYAIRQLETQLGARLFERSSRHVALTDAGRVLYGEALSLLRQGEEVGRLVRHAEAGLQGRLRIGFVGSMLYRGLPDLLAALRAELPDVEQVLAERNSHDQLEALRRGELDLGFIHANPPPEGVSARDLVAEPFVVCLPDTHRLAGQRSLRLADLAGEDFVFFAQAASPSYYETVLSLCVAAGFHPAVRHEVRHWLSVAALVASGLGVSIVPACLARAGLAGTCYVAFEHQARSVCQIAWPSLAPTSLQATALQAALRHFAPPPVRA	0	4395	5298	7	NA	NA	NA	no_plot	519	Bordetella parapertussis	TRUE	NA	NA	519	Bordetella parapertussis	517	Bordetella	506	Alcaligenaceae	80840	Burkholderiales	28216	Betaproteobacteria	1224	Proteobacteria	2	Bacteria	131567	cellular organisms
350	NZ_CP052851.1[3899339..3914728]	Bordetella parapertussis	519	acyl-CoA dehydrogenase family protein_1	acyl-CoA dehydrogenase family protein	acyl-CoA dehydrogenase family protein	WP_003814316.1	350#WP_003814316.1#NZ_CP052851.1[3899339..3914728]	NA	1	1710	MDTLSSTDTSATAASPVPDARGLNLFRADPYAAGLARCYLPADLCDHLLPHLDRLGALAGGRMDELAMTADRHPPTLSVRHRTGTDESRIDKHPAYVELERLAYSEFGLAALSHRGGVLGWPDPMPAAAKYALSHLFVQAEFGLCCPVSMTDSLARTLRKFGDPALVEQVLPQVITQDFDQLQQGAMFMTEQGAGSDVSATTVTAQAQADGRWALHGDKWFCSNPDAGFAMVLARSEPDAGLRGVSLFLLPRRLPDGSPNHYRILRLKDKLGTRSMASGEIRLEGALAWLVGQRGQGFKHMADMINNSRLSNGMRAAGLMRRALTEAVFFAQQRRAFGKRLIDMPLMRRQLAKMAMRAEQARSVMFQTAQALAAADRGEGEAALPRILTPLIKFRACRD…	0	5407	7117	8	NA	NA	NA	no_plot	519	Bordetella parapertussis	TRUE	NA	NA	519	Bordetella parapertussis	517	Bordetella	506	Alcaligenaceae	80840	Burkholderiales	28216	Betaproteobacteria	1224	Proteobacteria	2	Bacteria	131567	cellular organisms
351	NZ_CP052851.1[3899339..3914728]	Bordetella parapertussis	519	tripartite tricarboxylate transporter substrate binding protein_1	tripartite tricarboxylate transporter substrate binding protein	tripartite tricarboxylate transporter substrate binding protein	WP_003814318.1	351#WP_003814318.1#NZ_CP052851.1[3899339..3914728]	NA	1	981	MQQLIRSLVLAAGLALLGGAAAPALADYPDRPVTLVVPFPPGGPTDAMARRLAEGLKTQLDQTVVVENRGGAGGNIGAELVAHAKPDGYTLLFGTSGPLAINISLYKKQNYDPRTSFAPIVRIGHLPNILVVHPSVPANNVQELIAYAKANPDKLSYASSGNGASSHLAGVLFNRMAGTRILHVPYKGTGPALNDLLGGQVSMSFTDILTALPHIQAGKLKAIGLASAQRSQALPELPTIAEQGLAGYDVSVFFGIVAPKGTPDAIVQKLNAAFIAALDAPEVRDTLRKQGIVPAPERTPQALAGFINEEVDKWGELIRAAQISLD	0	7152	8133	9	tph_c	NA	NA	no_plot	519	Bordetella parapertussis	TRUE	NA	NA	519	Bordetella parapertussis	517	Bordetella	506	Alcaligenaceae	80840	Burkholderiales	28216	Betaproteobacteria	1224	Proteobacteria	2	Bacteria	131567	cellular organisms
352	NZ_CP052851.1[3899339..3914728]	Bordetella parapertussis	519	CoA transferase_1	CoA transferase	CoA transferase	WP_010929157.1	352#WP_010929157.1#NZ_CP052851.1[3899339..3914728]	NA	1	1125	MAVAALPPGALQGCRVIDLSRVLGGPYCTQILADHGADVLKIEPPGGDETRGWGPPFSGQTASYFIGVNRNKRGMALDLSQPAGQELLRGLLADADVLVENFKPGTLEKWGLGYDTLSQAFPRLVHCRVSGFGADGPLGGLPGYDACAQAMCGLMSVNGEADGPATRVGLPVVDMVTGLNAAVAVLLALQERQRSGLGQFLDITLYDCALSLLHPHAPNYFYSGRVPTRTGNAHPNIAPYETLPTGAGPIFLAVGNNRQFAALADALGAPQLAQDARFASNAERLAHRDALCAALTELLRPHEAASLAERLLRLGVPAAAVLDVAQALDHPHARHRGMLLEAGDYRGIASPIKLSRTPARLRSVPPTLQEPAGA	0	8146	9271	10	NA	NA	NA	no_plot	519	Bordetella parapertussis	TRUE	NA	NA	519	Bordetella parapertussis	517	Bordetella	506	Alcaligenaceae	80840	Burkholderiales	28216	Betaproteobacteria	1224	Proteobacteria	2	Bacteria	131567	cellular organisms
353	NZ_CP052851.1[3899339..3914728]	Bordetella parapertussis	519	gamma-glutamyltransferase_-1	gamma-glutamyltransferase	gamma-glutamyltransferase	WP_003814321.1	353#WP_003814321.1#NZ_CP052851.1[3899339..3914728]	NA	-1	1755	MPLRTLLAALCAAAICQAPAWAREAPGVAREDVNPEIASARSERAQAHAQRYMIATANPLASEAGYRILRAGGSATDAIIAAQLVLNLVEPQSSGIGGGAFMVHYDRGAGELRVYDSRETAPAAARPDRFLREGKPLSYAESVNNGRAVGTPGLLRGLELAHRQHGKLPWQALFEPAIAMAEQGFAVSPRLHESIAGDKALAAQPAAARYFYGPDGQAWPVGHRLRNPEFAATLRSIAREGADAFYRGPIARDIVAAVRAHPTPGDLAEADLAGYRAVVREPVCGLYRGYRLCGAPPPSSGPLAVLQMLGELEQYPLARMRPGSVEAVHYFSEAGRLAFADRDFYVADPAFVDVPVRALLDPAYLRQRGALIRPDRSMKTALPGDPQGLLAERARDDAI…	0	9278	11033	11	NA	NA	NA	no_plot	519	Bordetella parapertussis	TRUE	NA	NA	519	Bordetella parapertussis	517	Bordetella	506	Alcaligenaceae	80840	Burkholderiales	28216	Betaproteobacteria	1224	Proteobacteria	2	Bacteria	131567	cellular organisms
354	NZ_CP052851.1[3899339..3914728]	Bordetella parapertussis	519	LysR family transcriptional regulator_1	LysR family transcriptional regulator	LysR family transcriptional regulator	WP_010929158.1	354#WP_010929158.1#NZ_CP052851.1[3899339..3914728]	NA	1	897	MRLRHIEIFEAIRRTGSLTEAAALHISQPAASKLLAHAEAQLGFKLFERVKGRLVATRETEILAPEVARLNQDLGSVRRLAASLRDRPHGHLRLGCAPALGLGLLPGVVRASRDAQPGITFDIHTHHSAELVQGLLAHELDLAITFDANDHPGLTRTSLGHTELVHLSRRPGAGTTRLQELGGETLIVLDARDASGSLLQMALDAQGLAPRVAIQVQTHYVACALAEAGCGDAVVDAITARAMLRPGMALRRLEPALRVPISVMTRSQDALSTLHHDFIERLRQACSVLQAQPAPQPE	0	11139	12036	12	NA	NA	NA	no_plot	519	Bordetella parapertussis	TRUE	NA	NA	519	Bordetella parapertussis	517	Bordetella	506	Alcaligenaceae	80840	Burkholderiales	28216	Betaproteobacteria	1224	Proteobacteria	2	Bacteria	131567	cellular organisms
355	NZ_CP052851.1[3899339..3914728]	Bordetella parapertussis	519	tripartite tricarboxylate transporter substrate binding protein BugE_-1	tripartite tricarboxylate transporter substrate binding protein BugE	tripartite tricarboxylate transporter substrate binding protein BugE	WP_010929159.1	355#WP_010929159.1#NZ_CP052851.1[3899339..3914728]	NA	-1	984	MNKVRTLVQAIAVATGLVAAAGAQAADAYPSKAIRVIVPFAPGGSTDIIARLVTQRMSQELGQPMVVENKGGAGGAIGASEAARAEPDGYTLSIATVSTMAVNPACRPKDLPYDPIKDFQPVTNFANTANVVAVNPKFPAKDFKGFLEELKKNPGKYSYGSLGTCGVLHLMGESFKMATGTDIVHVPYKGSGPAVADAVGGQIELIFDNLPSSMPQIQAGKLRAMAIAWPTRIDAIKDVPTFADAGFPVLNQPVWYGLLAPKGTPMDVVNKLRDAAVVALKDPKVIKALDDQGSAPSGNTPEEFAKEIKEQYDWAQDVVKKQNIKLD	0	12100	13084	13	NA	NA	NA	no_plot	519	Bordetella parapertussis	TRUE	NA	NA	519	Bordetella parapertussis	517	Bordetella	506	Alcaligenaceae	80840	Burkholderiales	28216	Betaproteobacteria	1224	Proteobacteria	2	Bacteria	131567	cellular organisms
356	NZ_CP052851.1[3899339..3914728]	Bordetella parapertussis	519	AEC family transporter_1	AEC family transporter	AEC family transporter	WP_003814325.1	356#WP_003814325.1#NZ_CP052851.1[3899339..3914728]	NA	1	981	MSENSSLRRDAEAPLLSIFLPGSMSVALLVLPDFMLVALGWALRHKLGFSREFFAGTERMVYFVLFPALLFQSILRTPISAGHAMQLLQATAALMACGVALAWLAGPVLRPAPVALASAAQCGYRFNTYIGLALAASLAGGPGQTIMALIVGFAVPMANVAAVYGLARHSGNGLLRELARNPLLVSTLLGLACNLAGLSLPGPIDTVMARLGAAALALGIMCVGASLAWEGGKGHGRLIGWMLAVKLAAMPSAALGIAWALGLPALETRMLVLFSALPTASAAYVLAMRMGGDGRMVAVLISLGTLASAATIPLWLTAAAGLGAPN	0	13219	14200	14	NA	NA	NA	no_plot	519	Bordetella parapertussis	TRUE	NA	NA	519	Bordetella parapertussis	517	Bordetella	506	Alcaligenaceae	80840	Burkholderiales	28216	Betaproteobacteria	1224	Proteobacteria	2	Bacteria	131567	cellular organisms
357	NZ_CP052851.1[3899339..3914728]	Bordetella parapertussis	519	class II fumarate hydratase_-1	class II fumarate hydratase	class II fumarate hydratase	WP_003814327.1	357#WP_003814327.1#NZ_CP052851.1[3899339..3914728]	NA	-1	1174	MKTRTEKDTFGPIEVPEQHLWGAQTQRSLHFFAISTEKMPVPLVAAMARLKRAAAKVNAELGELDPQVADAIMRAADEVVAGKWPDEFPLSVWQTGSGTQSNMNMNEVLANRASELLGGERGEGRKVHPNDHVNRGQSSNDTFPTAMHVAAAVEVEHRVLPALKALRGTLAAKSAAFYDIVKIGRTHLQDATPLTLGQEISGYVAQLDLAEQQIRATLAGLHQLAIGGTAVGTGLNAHPQFSAKVSAELAHDTGSAFVSAPNKFQALASHEALLFAHGALKTLAAGLMKIANDVRWLASGPRSGLGEISIPENEPGSSIMPGKVNPTQCEAVTMLAAQVMGNDVAINVGGASGNFELNVFKPLVIHNFLQSVRLLADGMVSFDKHCAAGIEPNRERITE…	1	14216	15390	15	NA	NA	NA	no_plot	519	Bordetella parapertussis	TRUE	NA	NA	519	Bordetella parapertussis	517	Bordetella	506	Alcaligenaceae	80840	Burkholderiales	28216	Betaproteobacteria	1224	Proteobacteria	2	Bacteria	131567	cellular organisms
358	NZ_JABFNL010000014.1[51662..66766]	Achromobacter deleyi	1353891	tripartite tricarboxylate transporter substrate binding protein_-1	tripartite tricarboxylate transporter substrate binding protein	tripartite tricarboxylate transporter substrate binding protein	WP_171665176.1	358#WP_171665176.1#NZ_JABFNL010000014.1[51662..66766]	NA	-1	997	MQHNKQPARRRLAILAAAALGTMAMLPGALMAQTGTWPARQLKLVVPFPAGGSTDSVGRLLAAELSKELGQTVVVENKGGANGNIGSDAVAKAEPDGYTLLLSGVGSNAISYAVYQNMPYRNSDFAHISLLATGPNVLVANNEFPGKTFADFIKLARENPGKYTHASSGSGSSGHLAMEMLKQDAKIDLVHVPYKGGAAAITDLIGGRVSVLFLNQDALLPQVASGKVRALAVASAKRNPAYPDTPTVAESGYPGFSAESWFGLSAPAKTPPAVIQRLSQATVKALSSPEIRQKLESVGFVVVGDDPKSFSAFVDAEIAKWGKAAKASGAKLD	1	0	997	1	NA	NA	NA	no_plot	1353891	Achromobacter deleyi	TRUE	NA	NA	1353891	Achromobacter deleyi	222	Achromobacter	506	Alcaligenaceae	80840	Burkholderiales	28216	Betaproteobacteria	1224	Proteobacteria	2	Bacteria	131567	cellular organisms
359	NZ_JABFNL010000014.1[51662..66766]	Achromobacter deleyi	1353891	dihydroxy-acid dehydratase_-1	dihydroxy-acid dehydratase	dihydroxy-acid dehydratase	WP_171665177.1	359#WP_171665177.1#NZ_JABFNL010000014.1[51662..66766]	NA	-1	1746	MSNSDKRKKPEDLRSHRWYGVKDLRSFGHRSRTAQMGYHRSDYAGKPVIAIINTWSDINPCHSHFKQRVEEVKRGIWQAGGFPVEMPAMSLSEPFQKPTTMLYRNLLAMETEELLRSYPADGCVLMGGCDKTTPALIMGAVSMDLPTIFVPAGPMLRGNWNGNTLGSGSDTWKYWAELRAGNITEEDWQGVEDGIARSPGHCMTMGTASTMTGAVEALGLCLSGASSIPAPDSRHAQMASLTGKRIVEMVWEDLKPSDLLTAASYDNAVRTVLALSGSTNSVVHLIAMARRSGFGLDLDRFDHLARTTPVLANLRPAGKYLMEDFYYAGGLRAMLVQLGDLLDTSQRTVDGRTLGENIAGARIFNEDVIRPRAQALIERDGLAVLRGNLAPDGAVIKPP…	0	1043	2789	2	NA	NA	NA	no_plot	1353891	Achromobacter deleyi	TRUE	NA	NA	1353891	Achromobacter deleyi	222	Achromobacter	506	Alcaligenaceae	80840	Burkholderiales	28216	Betaproteobacteria	1224	Proteobacteria	2	Bacteria	131567	cellular organisms
360	NZ_JABFNL010000014.1[51662..66766]	Achromobacter deleyi	1353891	Ldh family oxidoreductase_-1	Ldh family oxidoreductase	Ldh family oxidoreductase	WP_171665178.1	360#WP_171665178.1#NZ_JABFNL010000014.1[51662..66766]	NA	-1	1113	MPGNGSSAVAVPVEQVREQILQVLMAWGMAEDLAHTTAGLMARTDLLGIDSHGISMLPAYEEKWRAGSLRLDARARVLRDGGASALIDGMGGLGYPVAAQAMHLAVDKALEHGVGAVSVCNSHHFGAAGVYARIAVERGVVGLVTSSANGVIMVPTRGAMPMLGTNPIAFGAPAAHNEAFVLDMATTTVAANKVKVYDFLDKPLPPGWAVDGQGAAVTDADAAMQFIFKHPEGGLTPLGGTPAMSSHKGYGLAMMAQILGGTLSGSAFAARRAPTRRPGEPDDVGHFFLALNPDAFRAAGSFESDMDDLIDAMHDTPPADPAEPVLVAGEPEAAERTRRLREGIPISAALAERLRGICERAGTPYLLDPA	0	2836	3949	3	NA	NA	NA	no_plot	1353891	Achromobacter deleyi	TRUE	NA	NA	1353891	Achromobacter deleyi	222	Achromobacter	506	Alcaligenaceae	80840	Burkholderiales	28216	Betaproteobacteria	1224	Proteobacteria	2	Bacteria	131567	cellular organisms
361	NZ_JABFNL010000014.1[51662..66766]	Achromobacter deleyi	1353891	FCD domain-containing protein_-1	FCD domain-containing protein	FCD domain-containing protein	WP_171665179.1	361#WP_171665179.1#NZ_JABFNL010000014.1[51662..66766]	NA	-1	774	MARPKASPPPAPQAPAEPDVPGALVLERGHRVRLADQLYGQIFEQIVSGGLNVGDKLPSENEISERFGVSRPVVREALLRLRADGLVTAHQGLGTFVSHQPAPRLKTFNDVQNVSAYLRAQEVRVALEGDAARLAALRRTDEQLKKIADTHAAFADSLARGQVSAEADLAFHASIAEASGNDFYLGVLESIHESISGFMRLTLNLTRTGSRQRAQRVVDEHASILDAIREQDGERARVAMQFHLGQARHRLVDRDRD	0	3999	4773	4	NA	NA	NA	no_plot	1353891	Achromobacter deleyi	TRUE	NA	NA	1353891	Achromobacter deleyi	222	Achromobacter	506	Alcaligenaceae	80840	Burkholderiales	28216	Betaproteobacteria	1224	Proteobacteria	2	Bacteria	131567	cellular organisms
362	NZ_JABFNL010000014.1[51662..66766]	Achromobacter deleyi	1353891	dihydrodipicolinate synthase family protein_-1	dihydrodipicolinate synthase family protein	dihydrodipicolinate synthase family protein	WP_171665180.1	362#WP_171665180.1#NZ_JABFNL010000014.1[51662..66766]	NA	-1	930	MKTSPVTAQDLQRSVIAVPPLARHADLSLNEAANKALLSHLEAGGVRNVMYGGNANFYNVGVSEYARIVDMLAGLAGADTWILPSVGPDYGKMMDQAAILRSRAFPTAMLLPMAFPYTDAGLADGVRRFTDALGKPAVLYIKSADYLAPETAARLIEEGRIAAFKYAVVRDDPAKDAYLSAMLQAVDSRWIVSGIGERPAIVHYRDFGLKSFTSGSVCVAPRGSMRLLHLLRDGRYDEAEAVRAHYLGLEDCRDGISPIRVLHDAVTLSGVADMGPMLPLLTGISSAERERVAPVARALAAWDRETATA	0	4906	5836	5	NA	NA	NA	no_plot	1353891	Achromobacter deleyi	TRUE	NA	NA	1353891	Achromobacter deleyi	222	Achromobacter	506	Alcaligenaceae	80840	Burkholderiales	28216	Betaproteobacteria	1224	Proteobacteria	2	Bacteria	131567	cellular organisms
363	NZ_JABFNL010000014.1[51662..66766]	Achromobacter deleyi	1353891	tripartite tricarboxylate transporter substrate binding protein_1	tripartite tricarboxylate transporter substrate binding protein	tripartite tricarboxylate transporter substrate binding protein	WP_171665181.1	363#WP_171665181.1#NZ_JABFNL010000014.1[51662..66766]	NA	1	1002	MHAAPVRGRFITAALLTATAFLLPAAPALADYPERDVKIIVPFPAGGTADIAARVVAAELGKSWNKAVVVDNKAGAGGNVGTAEAARATADGYTLLMGTVSTHAINQSVYTKLPYDPVKDFVPVTLVIPVPNILELNPKFADKHGIRTVADLIKYLKANPGSVNMASTGNGTSTHLSGELFQSMTGTRMTHVPYKGSSPALTDVMAGSADLIFDNLPSSMGFIKGGKLRPLAVTTTNRSPALPDVPTLAEAGVQGYEASSWFGLLAPAGTPPEIVQKIQRDVAAALQQEPVRAQLQAQGATPSGNTPTQFKQFMAQETVKWAEVVKKSGAKVD	0	6056	7058	6	tph_c	NA	NA	no_plot	1353891	Achromobacter deleyi	TRUE	NA	NA	1353891	Achromobacter deleyi	222	Achromobacter	506	Alcaligenaceae	80840	Burkholderiales	28216	Betaproteobacteria	1224	Proteobacteria	2	Bacteria	131567	cellular organisms
364	NZ_JABFNL010000014.1[51662..66766]	Achromobacter deleyi	1353891	tripartite tricarboxylate transporter substrate binding protein_1	tripartite tricarboxylate transporter substrate binding protein	tripartite tricarboxylate transporter substrate binding protein	WP_171665182.1	364#WP_171665182.1#NZ_JABFNL010000014.1[51662..66766]	NA	1	972	MNKLISAVVAAGAVVLGAPAAQAAGYPEKPVTMIVPFVPGGSSDITARSVTPALSKILGQTFVVENKPGANSAIGAQALARSTPDGYTMMVGSIGTFAINEALYKNLSYNPSKDFAYLTQAVRNPNVLVAATSFPASTVAELVDYAKKKPGTVSYASSGTGSSDHLSAVLFRQRTQSTGVDVPYKGGGAAIADLIGGQVNVSFQNLGAVQNHIKAGKLKALAITGDTRAADLPDVPTLAEAGIKDMVVYSWQGFAVPKGTPPAIVEQLAKALQTALRDPQTEKTLQGLGFEVVANTPQQFAEFQQGEVKRWKDVIQKANIQLE	0	7132	8104	7	NA	NA	NA	no_plot	1353891	Achromobacter deleyi	TRUE	NA	NA	1353891	Achromobacter deleyi	222	Achromobacter	506	Alcaligenaceae	80840	Burkholderiales	28216	Betaproteobacteria	1224	Proteobacteria	2	Bacteria	131567	cellular organisms
365	NZ_JABFNL010000014.1[51662..66766]	Achromobacter deleyi	1353891	2-hydroxyacid dehydrogenase_1	2-hydroxyacid dehydrogenase	2-hydroxyacid dehydrogenase	WP_171665183.1	365#WP_171665183.1#NZ_JABFNL010000014.1[51662..66766]	NA	1	957	MTTKQRIIQVGSLAGSPSANKRLADGYDVIELWKYPDRKAALAEHGKGVTAVVTSANFGANAELINALPDLKAICSWGVGYETIDVEAARQRGVLVSNTPDVLTDCVADLAWGLLIAGARRMGQGERFVRAGQWGQVHGSIPLGLRVSGKKLGIVGLGRIGEAIAKRGTGFDMEVRYHNRRKRDDISYGYEASLTELAKWADFLIVATVGGPSTRHLVNRDVLEALGPKGIIVNIARGPVIDEAALVAALEARKLGCAALDVFEHEPKVPEALIKSDNAVLLPHIGSATEETRLAMENMMLENLQSFFETGRVITPVE	0	8198	9155	8	NA	NA	NA	no_plot	1353891	Achromobacter deleyi	TRUE	NA	NA	1353891	Achromobacter deleyi	222	Achromobacter	506	Alcaligenaceae	80840	Burkholderiales	28216	Betaproteobacteria	1224	Proteobacteria	2	Bacteria	131567	cellular organisms
366	NZ_JABFNL010000014.1[51662..66766]	Achromobacter deleyi	1353891	hypothetical protein_-1	hypothetical protein	hypothetical protein	WP_171665184.1	366#WP_171665184.1#NZ_JABFNL010000014.1[51662..66766]	NA	-1	237	MTTHSRIAAFLSTSALCLGLAAAPAAFAAGADGTKSGEAKTQAQHKHHKSDKTSAKHGTAKSGGAAKMDKSGATTPAK	0	9306	9543	9	NA	NA	NA	no_plot	1353891	Achromobacter deleyi	TRUE	NA	NA	1353891	Achromobacter deleyi	222	Achromobacter	506	Alcaligenaceae	80840	Burkholderiales	28216	Betaproteobacteria	1224	Proteobacteria	2	Bacteria	131567	cellular organisms
367	NZ_JABFNL010000014.1[51662..66766]	Achromobacter deleyi	1353891	TSUP family transporter_-1	TSUP family transporter	TSUP family transporter	WP_171665185.1	367#WP_171665185.1#NZ_JABFNL010000014.1[51662..66766]	NA	-1	780	MSLFVIAACLAAGGLIGFMGGVLGIGGGLIAIPALVLLMGMSQQLAQGTALIMVLPTIMMAVRKYNQQTRIDKRVALAGAAGAVVFTWVGARLALGIDSSVLRQSFAVFLFFIALFYVWQTWRASRPAARRAQAPKRDAPVFTPRRASVLGILCGTLGGFFGVGGAVLAVPIITSVFRLPQTTAQALALSMVIPGSTIALITYTWAGQADWMVGAPLAVGSLLLVPVGVRLAYRLPERKLRAFFALMLFATVALLAFEA	0	9721	10501	10	NA	NA	NA	no_plot	1353891	Achromobacter deleyi	TRUE	NA	NA	1353891	Achromobacter deleyi	222	Achromobacter	506	Alcaligenaceae	80840	Burkholderiales	28216	Betaproteobacteria	1224	Proteobacteria	2	Bacteria	131567	cellular organisms
368	NZ_JABFNL010000014.1[51662..66766]	Achromobacter deleyi	1353891	DNA repair protein RadA_-1	DNA repair protein RadA	DNA repair protein RadA	WP_171665186.1	368#WP_171665186.1#NZ_JABFNL010000014.1[51662..66766]	NA	-1	1362	MAKSRTVYVCADCGGTTPKWQGKCPHCNAWNTLEETVESSTPAAAAHRYAPLASTSPVRSLSEIEARETPRQPTGLEEFDRVLGGGLVAGAVVLIGGDPGIGKSTLLLQALASLSETSNVLYVTGEESAEQVALRARRLGLQTGNVNLLAEIRLEAIQSAVSEQKPTVAVIDSIQTLYSGELSAAPGSVSQVRECAAQLTRLAKQTGIAIVMIGHVTKDGSLAGPRVLEHIVDTVLYFEGDTHSSFRLVRAFKNRFGAVNELGVFAMTDRGLRGVANPSALFLSQHEQQVAGSCVMATQEGTRPLLVEIQALVDSSHAPNPRRLTVGLEGNRLAMLLAVLHRHAGVSTFDQDVFVNAVGGVRITEPAADLPVLLAIMSSLRDKPLPRGLIAFGEVGLAG…	0	10599	11961	11	NA	NA	NA	no_plot	1353891	Achromobacter deleyi	TRUE	NA	NA	1353891	Achromobacter deleyi	222	Achromobacter	506	Alcaligenaceae	80840	Burkholderiales	28216	Betaproteobacteria	1224	Proteobacteria	2	Bacteria	131567	cellular organisms
369	NZ_JABFNL010000014.1[51662..66766]	Achromobacter deleyi	1353891	hypothetical protein_1	hypothetical protein	hypothetical protein	WP_171665187.1	369#WP_171665187.1#NZ_JABFNL010000014.1[51662..66766]	NA	1	633	MSITYRPPFDEDDERDLRALYRKPGPGTSPELDAAVRRSWHPGHSWHPAWGAAACAAMVVGLFAWTDMREAADLSDLNTQLIAPQESDSSPERTPAPQSVLTDTQPAAPVMQRVVAPLADPAATQPAPAEAASPAEPEAAAAETTQAEAAPAEVVAFTEQDIGARVAQIRALIVDDREDEAVQALRELQQGAPDFTLPDDLQELARQNPV	0	12388	13021	12	NA	NA	NA	no_plot	1353891	Achromobacter deleyi	TRUE	NA	NA	1353891	Achromobacter deleyi	222	Achromobacter	506	Alcaligenaceae	80840	Burkholderiales	28216	Betaproteobacteria	1224	Proteobacteria	2	Bacteria	131567	cellular organisms
370	NZ_JABFNL010000014.1[51662..66766]	Achromobacter deleyi	1353891	homoprotocatechuate degradation operon regulator HpaR_1	homoprotocatechuate degradation operon regulator HpaR	homoprotocatechuate degradation operon regulator HpaR	WP_171665188.1	370#WP_171665188.1#NZ_JABFNL010000014.1[51662..66766]	NA	1	465	MSPSFHHRNLPHLLLYARETLMAHFRPVLHAAGVTEQQWRVLRTLSEVGAMEPNQIARSCQILSPSLTRMLAGMEEQGLIKRARSSADQRRQEISLTAKSNKLIDRMRPLVDAKYQEIEEKIGKELLERLYRDVDAMVDLIRRDAGEPRESSEP	0	13140	13605	13	NA	NA	NA	no_plot	1353891	Achromobacter deleyi	TRUE	NA	NA	1353891	Achromobacter deleyi	222	Achromobacter	506	Alcaligenaceae	80840	Burkholderiales	28216	Betaproteobacteria	1224	Proteobacteria	2	Bacteria	131567	cellular organisms
371	NZ_JABFNL010000014.1[51662..66766]	Achromobacter deleyi	1353891	3,4-dihydroxyphenylacetate 2,3-dioxygenase_-1	3,4-dihydroxyphenylacetate 2,3-dioxygenase	3,4-dihydroxyphenylacetate 2,3-dioxygenase	WP_171665189.1	371#WP_171665189.1#NZ_JABFNL010000014.1[51662..66766]	NA	-1	852	MGKLALAAKVTHVPSMYLSELPGRHQGCREAAIQGHRIIGQRCRDLEVDTIVVLDVHWLVNAGYHVNSNGAFKGRYTSNELPHFIKDMDYAYRGNPALGRRIAESANAAGVGTRSHEIGSLELEYGTLVPMRYMNGDGRFAVVSVAAWCAWHTLDESRRFGAALRQAIEAGGDRVAVLASGSLSHRFNDNGGPEAAMHQISREFYRQVDLRVVELWRQGDWKTFCAMLPEYADLCVGEGGMHDTAMLLGLLGWDGYDRPVEIVTDYFASSGTGQINAIFPVPA	0	13605	14457	14	NA	NA	NA	no_plot	1353891	Achromobacter deleyi	TRUE	NA	NA	1353891	Achromobacter deleyi	222	Achromobacter	506	Alcaligenaceae	80840	Burkholderiales	28216	Betaproteobacteria	1224	Proteobacteria	2	Bacteria	131567	cellular organisms
372	NZ_JABFNL010000014.1[51662..66766]	Achromobacter deleyi	1353891	5-carboxymethyl-2-hydroxymuconate semialdehyde dehydrogenase_-1	5-carboxymethyl-2-hydroxymuconate semialdehyde dehydrogenase	5-carboxymethyl-2-hydroxymuconate semialdehyde dehydrogenase	WP_171665190.1	372#WP_171665190.1#NZ_JABFNL010000014.1[51662..66766]	NA	-1	610	MSIKHWINGKQVDSPDRFVTYNPATGDAIDEVAAGGAAEIDAAVSAAAAAFPKWASTPARERARLMRRLGELIDQNVPRLADLETQDTGLPISQTRKQLIPRASENFNFFAEVCTRMNGHTYPVDDQMLNYTLYQPVGVCALVSPWNVPFMTATWKTAPCLALGNTAVLKMSELSPLTADQLGMLALEAGIPAGVLNVVQGHGATAGDALVRHPGVRAISFTGGTVTGKKILAGAGGIKKYSMELGGKSPVLIFDDADVERALDAALFTIFSLNGERCTAGSRIFIQQTIYDDFVRRFAERAQRLAVGDPTDEKTHVGAMITRQHWEKVTGYIRLAEQEGARIVAGGADLPAGLPAHLAGGNFVRPTVLADVDNRMRCAQEEIFGPVACLLPFKDEADG…	1	14495	15105	15	NA	NA	NA	no_plot	1353891	Achromobacter deleyi	TRUE	NA	NA	1353891	Achromobacter deleyi	222	Achromobacter	506	Alcaligenaceae	80840	Burkholderiales	28216	Betaproteobacteria	1224	Proteobacteria	2	Bacteria	131567	cellular organisms
373	NZ_JACCBP010000001.1[2015124..2030001]	Pigmentiphaga litoralis	516702	tripartite tricarboxylate transporter substrate binding protein_-1	tripartite tricarboxylate transporter substrate binding protein	tripartite tricarboxylate transporter substrate binding protein	WP_179586317.1	373#WP_179586317.1#NZ_JACCBP010000001.1[2015124..2030001]	NA	-1	549	MTPRLVYAALALLATTLAHAADDYPNRTIRLVVPFSAGGPDTTARILAQRLTTQLGQSVVVDNRPGANGLIGSEAVARAIPDGYTLMLTSSSFVINPSMYAKMPYDSNRDFIKVAQVAAGEGLLFVVNPALPATTVKEFIALAKTPGQRVSFGSPGIGGNLHIAGELFNQQAGVNMVHIPYKGAGQAVTAVMAGELQAMFVTSPLALPQIKAGKLRPLAFTGLARASYLPDVPTIKEAGLPDFEIDAGWHGVFAPTGTPPAVVDRLRTEITAALANPEMRAAIEATGLAPSRLAPADFSRTVDADITKYAELLRLAGVKPE	1	0	549	1	NA	NA	NA	no_plot	516702	Pigmentiphaga litoralis	TRUE	NA	NA	516702	Pigmentiphaga litoralis	152267	Pigmentiphaga	506	Alcaligenaceae	80840	Burkholderiales	28216	Betaproteobacteria	1224	Proteobacteria	2	Bacteria	131567	cellular organisms
374	NZ_JACCBP010000001.1[2015124..2030001]	Pigmentiphaga litoralis	516702	cupin domain-containing protein_-1	cupin domain-containing protein	cupin domain-containing protein	WP_179586316.1	374#WP_179586316.1#NZ_JACCBP010000001.1[2015124..2030001]	NA	-1	660	MTTEQRPAQASSPTAASPTADSKDTAGKIRRVVTGHDANGKAIVMSDDVAPVVFTAEKRPGYASTEIWRTLATPAPITADMEDPTPGARRQLPTSRGSVIRINTLAPESEAVRSLSPDEAQNVFASLGNSTASTFAKNGRHPMMHRTETIDYAIVLSGEITMLLDDSEVVLKAGDVLVQCGTNHAWSNRGTVPCQIAFILLDGEFDAGLKSALDEFDGA	0	628	1288	2	NA	NA	NA	no_plot	516702	Pigmentiphaga litoralis	TRUE	NA	NA	516702	Pigmentiphaga litoralis	152267	Pigmentiphaga	506	Alcaligenaceae	80840	Burkholderiales	28216	Betaproteobacteria	1224	Proteobacteria	2	Bacteria	131567	cellular organisms
375	NZ_JACCBP010000001.1[2015124..2030001]	Pigmentiphaga litoralis	516702	tripartite tricarboxylate transporter substrate binding protein_-1	tripartite tricarboxylate transporter substrate binding protein	tripartite tricarboxylate transporter substrate binding protein	WP_179586314.1	375#WP_179586314.1#NZ_JACCBP010000001.1[2015124..2030001]	NA	-1	1020	MRATFFKAAAAIACAGSLLIYTPDGQAQAAASGTAQTAASADYPTRPIRLVVPSAAGGGTDIVARLIAQKLSASLGQQVFVDNRPGAGQMIGIDQVAKASPDGYTLLMAASTLALNPAMYKTVPYDTLRDLAPISEVASLPNVLVVHPSVPANSLPELLALARSQPGKLTYASAGVGTSPHMSMELLKDLARVDILHVPYKGTGPALVDVVAGQVAMMMGNTLSVLPHIKSGKLRALGVSGTTRSAALPDVPTLAEGGVARYESVQWYGLLAPAGTPVAIINKLHTTTVSALGDADLKKHLAADGAEPVGNSPDAFGALIRSEITKWKAVAAAAGITPE	0	1330	2350	3	NA	NA	NA	no_plot	516702	Pigmentiphaga litoralis	TRUE	NA	NA	516702	Pigmentiphaga litoralis	152267	Pigmentiphaga	506	Alcaligenaceae	80840	Burkholderiales	28216	Betaproteobacteria	1224	Proteobacteria	2	Bacteria	131567	cellular organisms
376	NZ_JACCBP010000001.1[2015124..2030001]	Pigmentiphaga litoralis	516702	alpha/beta fold hydrolase_-1	alpha/beta fold hydrolase	alpha/beta fold hydrolase	WP_179586312.1	376#WP_179586312.1#NZ_JACCBP010000001.1[2015124..2030001]	NA	-1	849	MPIAALNGTHIPFEVIGDQGDWIALSPGGRRGMDELVPLATRIAAGGYRVVIHDRRNCGAGELAFDDRAPEFEIWADDLHALLQHLGASPAIVGGFSSGCRLSLLLALKHPEAVRALLLMRITGGAFAAERLAAKYYTDYIKRVKEGGMDALARDAHFRALIVANPSNQARLQQFDAATFLRIMRAWRADLEAGAAMPVLGATEAQLRSLTMPACVIPGTDRTHPIDVGERVQQLIAGSTWIPMQLKQQDADFIPMEAWCDDATLAEQLLAFLKTLPATGAH	0	2539	3388	4	NA	NA	NA	no_plot	516702	Pigmentiphaga litoralis	TRUE	NA	NA	516702	Pigmentiphaga litoralis	152267	Pigmentiphaga	506	Alcaligenaceae	80840	Burkholderiales	28216	Betaproteobacteria	1224	Proteobacteria	2	Bacteria	131567	cellular organisms
377	NZ_JACCBP010000001.1[2015124..2030001]	Pigmentiphaga litoralis	516702	substrate-binding domain-containing protein_1	substrate-binding domain-containing protein	substrate-binding domain-containing protein	WP_179586310.1	377#WP_179586310.1#NZ_JACCBP010000001.1[2015124..2030001]	NA	1	1032	MTDRPAPTIKDIARLLGVAVSTVGRALQNNPRISQDMRDRVHQTARDIGYVANSTAATMRSKTSKLVGFLVPDVEDNDSATIAKAVAQSCNRAGLQLMLAMSEDDPQREHAHLQTLVGARAAGLIIVPTLTPTPESLAIIQRLPFIQVIRHLPNLSSDYFVYDDEAGMRTATEHLLALGHRRIAYVGTLAALSTGARRLAGFHRAHRDAGLEADPRLIATLPPSADGVGHALRDMLTRSRPTAVIAGGSRITVALLAAIDDAGVAVPDALSVIGFGDHAWSTWWRGGLTTLGLPIRELAAESGALLVERVTGVRSDDAPSIDTPRHVSHPLKLIVRRTTQQIS	0	3886	4918	5	NA	NA	NA	no_plot	516702	Pigmentiphaga litoralis	TRUE	NA	NA	516702	Pigmentiphaga litoralis	152267	Pigmentiphaga	506	Alcaligenaceae	80840	Burkholderiales	28216	Betaproteobacteria	1224	Proteobacteria	2	Bacteria	131567	cellular organisms
378	NZ_JACCBP010000001.1[2015124..2030001]	Pigmentiphaga litoralis	516702	hypothetical protein_-1	hypothetical protein	hypothetical protein	WP_179586308.1	378#WP_179586308.1#NZ_JACCBP010000001.1[2015124..2030001]	NA	-1	1359	MKEIRAAPAKAPAGPATGQVAASPRAARIDAPSDYLTATQAAEALNVKVPSLYSYVSRGVIRSVTQPGTRARLYYREDVERAAKRMGGRAGIPDTVETAVRWGQPMLTTSITDLADGGHRYRGVPALELAAAGRSFESVAELLWSGVDVPGLTLWEAAMPSSEVLDRLDAAAGSSDTLTSARLMSLATAIIATAMPNKPDFERGTTVADAVSLISLYACAMGLLGPARKVYRPSHPQSIAQLLANALIGEDAADARTRAAHLRAINATLVVCADHELSPATFAARVAASAGAELRACLHAAIVTQSGIRFGGGCERTEALLASVQTAEALRDAITGYVASGRQVPGFNPVSYPKGDPRARYLIDLASSMPKNERNQFHALDGIFKAAQAEFDLKPRIDV…	0	5495	6854	6	NA	NA	NA	no_plot	516702	Pigmentiphaga litoralis	TRUE	NA	NA	516702	Pigmentiphaga litoralis	152267	Pigmentiphaga	506	Alcaligenaceae	80840	Burkholderiales	28216	Betaproteobacteria	1224	Proteobacteria	2	Bacteria	131567	cellular organisms
379	NZ_JACCBP010000001.1[2015124..2030001]	Pigmentiphaga litoralis	516702	tripartite tricarboxylate transporter substrate binding protein_1	tripartite tricarboxylate transporter substrate binding protein	tripartite tricarboxylate transporter substrate binding protein	WP_179586306.1	379#WP_179586306.1#NZ_JACCBP010000001.1[2015124..2030001]	NA	1	990	MTRRLFLTTTGRIALASALAACTLAAQTTQAAPKQVRLVVPFPPSGNLDTITRLVAERMQPTFGTVIVENRSGANGNIGAENVYNAAPDGGTLMVAPYGPLAVNKNLYPKLSYDSDQFVPVAMLASVPNVLAINPSLPVNSLAEFITYVKANPGKVAFASQGSGSSSHLAAELFMQLTGTKMLHVPYKGTGPAIVDLLGGQVSVFFDTLSSSGKYQKSGKLKILAVADSKRSALLPEVPTFAEAGPPAMKDMLANAWYAVVAPPKTPADIVARYEKVISAAIAAPDMKQKFAEMGIDPFVANSADTGAFIRKETVKWGQVIRAGQISVD	0	6983	7973	7	tph_c	NA	NA	no_plot	516702	Pigmentiphaga litoralis	TRUE	NA	NA	516702	Pigmentiphaga litoralis	152267	Pigmentiphaga	506	Alcaligenaceae	80840	Burkholderiales	28216	Betaproteobacteria	1224	Proteobacteria	2	Bacteria	131567	cellular organisms
380	NZ_JACCBP010000001.1[2015124..2030001]	Pigmentiphaga litoralis	516702	class II aldolase/adducin family protein_1	class II aldolase/adducin family protein	class II aldolase/adducin family protein	WP_179586304.1	380#WP_179586304.1#NZ_JACCBP010000001.1[2015124..2030001]	NA	1	699	MDTQDQIADKKQQIADALGMMERAGIIDFNGHMSARIGDNRILINSGASVRSAITAADIIEIDLDGQPVDGGIVPPMEFHIHASIYRQRPDVNAVAHTHPVWSTLFSSVGKTVEPVIMQAAMLGEIQQFPKTASINTRDLGDELASCLGRHRIAMLKSHGAVVAAEGILEVFVLAYYLEETAHRQYLASQIGQPDVLNAEQIQKINANLWKPHLLKKAWDYHLAKLHRTTSC	0	7986	8685	8	NA	NA	NA	no_plot	516702	Pigmentiphaga litoralis	TRUE	NA	NA	516702	Pigmentiphaga litoralis	152267	Pigmentiphaga	506	Alcaligenaceae	80840	Burkholderiales	28216	Betaproteobacteria	1224	Proteobacteria	2	Bacteria	131567	cellular organisms
381	NZ_JACCBP010000001.1[2015124..2030001]	Pigmentiphaga litoralis	516702	Rieske 2Fe-2S domain-containing protein_1	Rieske 2Fe-2S domain-containing protein	Rieske 2Fe-2S domain-containing protein	WP_179586302.1	381#WP_179586302.1#NZ_JACCBP010000001.1[2015124..2030001]	NA	1	1287	MLKKEQNELVTRTSKGTAMGELFRRYWLPALLSEELPEPDCAPVRLQLLGERLITFRDSSGTLGAIDEFCAHRGVSLWFGRNEEGGIRCPYHGWKYDTQGRCIDIPSEPADSKLCDRVKLSAYPLIERGGVIWIYMGEPEHQPALPEWEFATVPADQSFMTKRLQECNWLQALEGGIDSSHVSFLHSGGLKHDPLFKGSKGNEYNLGDLRPHFEVAETDGGLLIGARRKAEPGSVYWRITPWVMPNFMMVPPRADHPVHGHFWVPIDDENCWAWSFDYHPTRALKESEVQAMKDGAGIHCKYVPGTYIPLANKSNDYLMDRARQKSGELYSGVESIAIQDSSLQESMGAIQDRTKETLTSTDRGIVQARRRLIAAATALAESGTPPPGMEAALQHIRSV…	0	8678	9965	9	tph_a2	NA	NA	no_plot	516702	Pigmentiphaga litoralis	TRUE	NA	NA	516702	Pigmentiphaga litoralis	152267	Pigmentiphaga	506	Alcaligenaceae	80840	Burkholderiales	28216	Betaproteobacteria	1224	Proteobacteria	2	Bacteria	131567	cellular organisms
382	NZ_JACCBP010000001.1[2015124..2030001]	Pigmentiphaga litoralis	516702	amidohydrolase family protein_1	amidohydrolase family protein	amidohydrolase family protein	WP_179586300.1	382#WP_179586300.1#NZ_JACCBP010000001.1[2015124..2030001]	NA	1	1704	MIVRIPSSPRLLATAIASLATLAAGCSQVGPTSSVVAADAVYTNGKVVTVDKQSSIVQAFAVKDGKYVFVGSTAQAQAYVGPSTQVVDLKGRTTIPGLADSHLHTAGGGPGLDLSKTRSLGEVYAVLRDAARNAAPGTVLVSNSDWHEAQFKEQRLPTAAELEAAAPGVPVVLVRGGHSYFLNDTALARYKITKATPVPAGGAIPVGPDGKLTGEITDTAKPLVALPPTPAPSVAGLEAQQKILNSYGLTSIRVPGISVANYRVFQQLRDAGKATVRYSILLRPRDLADYRASVVPSGVKPGEGDDWVKIWGIKVAVDGGFEGGLMTKPYLDPLGKNGTYYGLRLLDQPSFNEYVVTLNRAGWRSAVHAVGDAAIDQALTGYEAANADQPIVGKGWVIE…	0	10154	11858	10	NA	NA	NA	no_plot	516702	Pigmentiphaga litoralis	TRUE	NA	NA	516702	Pigmentiphaga litoralis	152267	Pigmentiphaga	506	Alcaligenaceae	80840	Burkholderiales	28216	Betaproteobacteria	1224	Proteobacteria	2	Bacteria	131567	cellular organisms
383	NZ_JACCBP010000001.1[2015124..2030001]	Pigmentiphaga litoralis	516702	MipA/OmpV family protein_-1	MipA/OmpV family protein	MipA/OmpV family protein	WP_179586298.1	383#WP_179586298.1#NZ_JACCBP010000001.1[2015124..2030001]	NA	-1	750	MTLFQRAVCAGALLAAAGAAHAQNFIGAGAGIVPKYPGANDYRVAPVPLINYSNGMFFASSVDGFPGIGLRANLGNDLSAGVRLGLNLGRPEDRAPILRGLGDIDAHANYGAFIAWTPGRFRATLSYTQATKGYGGTANLGASYAVWQQGPHRVTAGGGLEWGNSDYMQTWFGVTPSQAARSEAGLRPYQPSSGLSGGSVFASWSYRINERWGAVTTLGVRSLVGDAKDSPIAESATRAFGMVGVTYAF	0	11912	12662	11	NA	NA	NA	no_plot	516702	Pigmentiphaga litoralis	TRUE	NA	NA	516702	Pigmentiphaga litoralis	152267	Pigmentiphaga	506	Alcaligenaceae	80840	Burkholderiales	28216	Betaproteobacteria	1224	Proteobacteria	2	Bacteria	131567	cellular organisms
384	NZ_JACCBP010000001.1[2015124..2030001]	Pigmentiphaga litoralis	516702	hypothetical protein_-1	hypothetical protein	hypothetical protein	WP_179586296.1	384#WP_179586296.1#NZ_JACCBP010000001.1[2015124..2030001]	NA	-1	447	MDAPLQGFPSIRTAFDRSLWLTTLRPLEDADAAPRDRLEAYFELLDFICDARLGDRAGNDASQAPDASDQDEALAGALDLLTYTRALLARLMRQAAAGSPRDLPERVDAVMASGLAVTTSVAGHRHHDHRPHLHLRLKAARQFALQAL	0	12691	13138	12	NA	NA	NA	no_plot	516702	Pigmentiphaga litoralis	TRUE	NA	NA	516702	Pigmentiphaga litoralis	152267	Pigmentiphaga	506	Alcaligenaceae	80840	Burkholderiales	28216	Betaproteobacteria	1224	Proteobacteria	2	Bacteria	131567	cellular organisms
385	NZ_JACCBP010000001.1[2015124..2030001]	Pigmentiphaga litoralis	516702	two-component sensor histidine kinase_-1	two-component sensor histidine kinase	two-component sensor histidine kinase	WP_179586294.1	385#WP_179586294.1#NZ_JACCBP010000001.1[2015124..2030001]	NA	-1	1380	MTMKALRSRQLVVLLIVQAGFWVVWMSLLTWTETRDVTGRLDSALSQSARQALMSIPKHLADLSSTETFIAPPPSPVELKRVNFQMWDLRTGRLLMRTPSSPREPFVPGFVEGFNDSTAAGGPWRAYAVSDVEGRVQIQMARAEEQIKADIVSSVLKGLGGAMVMFVCLASMMWVTVVCSFRPMQRAGEALRHRDRLDFTPLALREFPLEVHPFVNAVNDLQLRQSEALVRERQFLSDAAHELRTPLAALTTQAQQALRATDAAHRDEALVQVLAGTRRATRLAEQLLDQAQLDAHDCMLTDRVDLASLVSLEVREFDARAHAKGQHIRLEIEPTVVLANVDAVGVLIRNLIDNALRHAPAGARVEIVCHPGGEGDAVLTVRDDGPGIPDADCERVFER…	0	13195	14575	13	NA	NA	NA	no_plot	516702	Pigmentiphaga litoralis	TRUE	NA	NA	516702	Pigmentiphaga litoralis	152267	Pigmentiphaga	506	Alcaligenaceae	80840	Burkholderiales	28216	Betaproteobacteria	1224	Proteobacteria	2	Bacteria	131567	cellular organisms
386	NZ_JACCBP010000001.1[2015124..2030001]	Pigmentiphaga litoralis	516702	winged helix-turn-helix domain-containing protein_-1	winged helix-turn-helix domain-containing protein	winged helix-turn-helix domain-containing protein	WP_179586292.1	386#WP_179586292.1#NZ_JACCBP010000001.1[2015124..2030001]	NA	-1	307	MQILLIEDDAMLGQALVSALSQLPDAVVTWQRDAFSGKLALLDQAYSVVLLDLGLPDQSGLSVLSALRARHDTTPVMIITAQARLSDRIRGLDTGADDYIIKPFELDELLARMRALIRRSTQAVSAVMRRFDVEVNPGQRAVSKAGVPVALSVHEYRTLTALMQSQGKPLSRDYLESMIYGERSSVESNTVAVYIHQLRRKLGDELIETVHGVGYRIGEPGA	1	14571	14878	14	NA	NA	NA	no_plot	516702	Pigmentiphaga litoralis	TRUE	NA	NA	516702	Pigmentiphaga litoralis	152267	Pigmentiphaga	506	Alcaligenaceae	80840	Burkholderiales	28216	Betaproteobacteria	1224	Proteobacteria	2	Bacteria	131567	cellular organisms
387	NZ_JACCBP010000001.1[4097931..4113081]	Pigmentiphaga litoralis	516702	enoyl-CoA hydratase/isomerase family protein_-1	enoyl-CoA hydratase/isomerase family protein	enoyl-CoA hydratase/isomerase family protein	WP_179582690.1	387#WP_179582690.1#NZ_JACCBP010000001.1[4097931..4113081]	NA	-1	707	MDGIIVEKANRIATVTLDYPPVNVLTLARYAEITRVFDEISTMDDVNVVVFTAKGTKAFCAGLDLQEFLAATPEEDPHRASIVRATFKAIRHCKVPVIAAVNGPALGAGCVLAGASDIRIASEKATFAMPEINVGRCGGGAHTGRLVPQGTLRLMAFTGEPISAWEAHRVGMVEQVVTPRRLMPTAMDLAGVIAKKSPIGLRLMKEALNRIETMPVDEGYELEQQYSTRLMMTEDAREATRSVVEKRAPVFTGR	1	0	707	1	NA	1	5'H	no_plot	516702	Pigmentiphaga litoralis	TRUE	NA	NA	516702	Pigmentiphaga litoralis	152267	Pigmentiphaga	506	Alcaligenaceae	80840	Burkholderiales	28216	Betaproteobacteria	1224	Proteobacteria	2	Bacteria	131567	cellular organisms
388	NZ_JACCBP010000001.1[4097931..4113081]	Pigmentiphaga litoralis	516702	CoA transferase_-1	CoA transferase	CoA transferase	WP_179582688.1	388#WP_179582688.1#NZ_JACCBP010000001.1[4097931..4113081]	NA	-1	1230	MNAGRGPLSHLKVLDLSRILAAPWAGQLLADLGAEVIKVERPGAGDDTRSWGPPFLKDAGGRDTAEAGYYLAVNRGKQSITVSLDHPDGQKVVRELAANADIVLENFKAGTLARYGLDAASLRAINPKLIYCSVTGFGQTGPRRDQPAYDFLIQAMGGLMSVTGERDGQPGGGPQKVGVPIVDLMTGMYTAVAVLAAVARRDQTGQGETIDIGMLDVQVATLANQAMNYLVSDKVPQRNGNAHPNIQPQDVFRCNDGNVILVVGNDGQFARLCEVLGKSEWVRDERFATNAQRVRNIGVLKAMLDEAFSGYSRAELTAALDRVGVPCGPINTVPEVFEDPQVRDRGMLMHLPHPSGRDVPQVANPIRFSDAPIQYDLPPPLLGQHADKILRDLGYDDDG…	0	757	1987	2	NA	1	5'H	no_plot	516702	Pigmentiphaga litoralis	TRUE	NA	NA	516702	Pigmentiphaga litoralis	152267	Pigmentiphaga	506	Alcaligenaceae	80840	Burkholderiales	28216	Betaproteobacteria	1224	Proteobacteria	2	Bacteria	131567	cellular organisms
389	NZ_JACCBP010000001.1[4097931..4113081]	Pigmentiphaga litoralis	516702	TauD/TfdA family dioxygenase_1	TauD/TfdA family dioxygenase	TauD/TfdA family dioxygenase	WP_179582686.1	389#WP_179582686.1#NZ_JACCBP010000001.1[4097931..4113081]	NA	1	1089	MLTTQSGSLHGGPSAGALHAGSVHINPGSPLAGPEVWSGASLRDRTDWITHLTPAEIAELAQAVAALKSAGTPDMGFDASDFRIPLVAKRLAEVRDTLEGGRGFALLRGLPMADYSDADARLLFWGLAQHLGDPQGQDGAGNRMHSVTNTGMRVEPGNSVRSFQTDDELTFHNDGGDAFMLLCLRPAKSGGMSKLVSVAHLYNEVLRRRPDLVATLQEPFHFDTRGQHPTGLKIQSVPILNFHEGRLSALYKRRYLRLAQENPDVPRLTPAQQDAIDLIESLCNDPDVQLNFYMEAGDIQIANNYSVLHARSKYEDREDPAQRRHLLRAWLTLPNGRPLPKVFGLTREFSQSYVSRHGGSGN	0	2259	3348	3	NA	1	5'H	no_plot	516702	Pigmentiphaga litoralis	TRUE	NA	NA	516702	Pigmentiphaga litoralis	152267	Pigmentiphaga	506	Alcaligenaceae	80840	Burkholderiales	28216	Betaproteobacteria	1224	Proteobacteria	2	Bacteria	131567	cellular organisms
390	NZ_JACCBP010000001.1[4097931..4113081]	Pigmentiphaga litoralis	516702	tripartite tricarboxylate transporter substrate binding protein_1	tripartite tricarboxylate transporter substrate binding protein	tripartite tricarboxylate transporter substrate binding protein	WP_179582684.1	390#WP_179582684.1#NZ_JACCBP010000001.1[4097931..4113081]	NA	1	978	MLKRAMSLVLGVCLVSGVSGGIAYAADAYPDRPVRLVVPYTPGGNTDLLARIIAQKLGDAWKQSVVVENRAGAAGTIGVDLVAKAKPDGYTIVLGTFGNILTAPGLYKNLPYDPVKDLAPVILLAEPATALVVHPGVPVNSVKELIAYAKANPGALNYGSSGSGSSNHLFGALFASMANVKMTHVPYKGSGPAVNDLVGGMIQLSFAPFPLVLEQIKAGKLKALAVTGATRSPALPQVPTVAEAGLTGYEAIGWFALMAPAGTPRSILSKLNTEVDRILKTPEVRASLAAEGADPVGGSIDDAARSISEGVRKWGTLVQQLDITL	0	3350	4328	4	NA	1	5'H	no_plot	516702	Pigmentiphaga litoralis	TRUE	NA	NA	516702	Pigmentiphaga litoralis	152267	Pigmentiphaga	506	Alcaligenaceae	80840	Burkholderiales	28216	Betaproteobacteria	1224	Proteobacteria	2	Bacteria	131567	cellular organisms
391	NZ_JACCBP010000001.1[4097931..4113081]	Pigmentiphaga litoralis	516702	GntR family transcriptional regulator_1	GntR family transcriptional regulator	GntR family transcriptional regulator	WP_179582681.1	391#WP_179582681.1#NZ_JACCBP010000001.1[4097931..4113081]	NA	1	705	MATLRSALPTPVSTQSLVEQIASRLADDIVTGVYLPGERLKEQDIAARFGTSRAPLREAFRLLERDGLIRMMPWRGVCVSDYTRDEVRELFEIRADLLAMCVQRIVAKGDPAQLEAVRAAIDGLSALTEAGGDERDYKQATAALSAMLSDMTGNRYLHGLVTDFRQRLLWYYCFLGQSTIERRRESNRLWGDMVAAMERQDAWGAAAAAQRVTMATAAFALQLADARAAQHALA	0	4352	5057	5	NA	1	5'H	no_plot	516702	Pigmentiphaga litoralis	TRUE	NA	NA	516702	Pigmentiphaga litoralis	152267	Pigmentiphaga	506	Alcaligenaceae	80840	Burkholderiales	28216	Betaproteobacteria	1224	Proteobacteria	2	Bacteria	131567	cellular organisms
392	NZ_JACCBP010000001.1[4097931..4113081]	Pigmentiphaga litoralis	516702	RNA 2',3'-cyclic phosphodiesterase_1	RNA 2',3'-cyclic phosphodiesterase	RNA 2',3'-cyclic phosphodiesterase	WP_179582679.1	392#WP_179582679.1#NZ_JACCBP010000001.1[4097931..4113081]	NA	1	672	MSDQSLSDQSAHQPSVSHQPEPGQAATPAWHRCFLALAPDLPTRTTLAAYRTPPRAQATLFDDLHLTLAFLGGLTQQQAEHLAGALPGLAAPAIDLAALPFDGLERWPEGDAPRVLVATYRVPPLLAGLVEDVQQLVSSAGLPVDPRPFRAHITLARYRRRATVTIDVAGVPTQVSDPPLGPPPACRLPPARFTHLALYTRSEAPGGPRYRVLAHVPLKAGLA	0	5227	5899	6	NA	1	5'H	no_plot	516702	Pigmentiphaga litoralis	TRUE	NA	NA	516702	Pigmentiphaga litoralis	152267	Pigmentiphaga	506	Alcaligenaceae	80840	Burkholderiales	28216	Betaproteobacteria	1224	Proteobacteria	2	Bacteria	131567	cellular organisms
393	NZ_JACCBP010000001.1[4097931..4113081]	Pigmentiphaga litoralis	516702	helix-turn-helix domain-containing protein_-1	helix-turn-helix domain-containing protein	helix-turn-helix domain-containing protein	WP_179582677.1	393#WP_179582677.1#NZ_JACCBP010000001.1[4097931..4113081]	46	-1	774	MVEEVRSKEDKEYVAGLEKGLAVIEAFGIRNGPLTLSEAAEITGHPRATTRRSLLTLQRLGYVESDGKTFRLAPRVLRLGHAYVTSSPLPKLVQPVIEAISERTQESSSLAVLDGANVVFVARAATRRSLSHGLGMGSRLPVHSAATGRVLLAALAPDEAERILLRMARRPLTPRTRIDVPELLALLDDVRRDGYAVSDEELELGLRSIAVPVHDMHGRTVAAMSIVASTSRFTLAAMIDTLLPEVQRGRRMLTAML	0	5996	6770	7	tph_r	1	5'H	plot	516702	Pigmentiphaga litoralis	TRUE	NA	NA	516702	Pigmentiphaga litoralis	152267	Pigmentiphaga	506	Alcaligenaceae	80840	Burkholderiales	28216	Betaproteobacteria	1224	Proteobacteria	2	Bacteria	131567	cellular organisms
394	NZ_JACCBP010000001.1[4097931..4113081]	Pigmentiphaga litoralis	516702	tripartite tricarboxylate transporter substrate binding protein_1	tripartite tricarboxylate transporter substrate binding protein	tripartite tricarboxylate transporter substrate binding protein	WP_179582675.1	394#WP_179582675.1#NZ_JACCBP010000001.1[4097931..4113081]	51	1	978	MRHPLLTACSAALACTFAVAAPMAGAADFPTKPIRIVVPYSAGGTADVLPRIIGEKLTAMWGQPVIIDNRPGAGGNIGADMVAKAAPDGYTLMATPPAPLAINRYLYKSLPFEPEAFVPVTILAKVPNVLAVQNNLPPKSATEFLNYARSRNGQVTVATQGNGTTSHLTGAMVANQARAGFVFVPYKGTAPALADLMGGQVDAFFDNISSAYRQHEAGKVRILAVTSNTRSPLLPKVPTLAESGLPGFDVSTWFGVVAPAGTPTEVVQKLNAGIVEVLKMADVQQKFIEQGAQVVGDTPKQMGEFLDAERIKWKKAIATADVSIN	0	6920	7898	8	tph_c	1	5'H	plot	516702	Pigmentiphaga litoralis	TRUE	NA	NA	516702	Pigmentiphaga litoralis	152267	Pigmentiphaga	506	Alcaligenaceae	80840	Burkholderiales	28216	Betaproteobacteria	1224	Proteobacteria	2	Bacteria	131567	cellular organisms
395	NZ_JACCBP010000001.1[4097931..4113081]	Pigmentiphaga litoralis	516702	Rieske 2Fe-2S domain-containing protein_1	Rieske 2Fe-2S domain-containing protein	Rieske 2Fe-2S domain-containing protein	WP_179582673.1	395#WP_179582673.1#NZ_JACCBP010000001.1[4097931..4113081]	63	1	1248	MSDIHPLQDARQWAPGLTRVPYWLYRDEPVYRTEQQRVFQGPTWNYLCLEAEIPEPGDYRTTFVGDMPVIVVRDEEGELQAFENRCAHRGALIALKEGGKAQDFSCVYHAWRYDLQGNLKGVAFENGVNGKGGMPPDFCKEDHGPRKLRTASMSGIVFGSLHEDVPDIEEYLGEEIVERIERVMCKPVEVIGRFKQTIPNNWKLYMENVKDSYHASLLHVFFTTFNINRLSQKGGVIVSDNGAHHVSYSKVSHQPQASTEYSAEKLRSDKEDYALADPTMLDGCDEFGDGITLQILSVFPGFVLAQIQNTLAIRQVLPTGIDKTVLNWTYLGFKDDTPELRRMRLKQSNLTGPAGFVSMEDGAVGGFVQRGIAGAVDGEEAILEMGGAGIETQENRTTE…	0	7998	9246	9	tph_a2	1	5'H	plot	516702	Pigmentiphaga litoralis	TRUE	NA	NA	516702	Pigmentiphaga litoralis	152267	Pigmentiphaga	506	Alcaligenaceae	80840	Burkholderiales	28216	Betaproteobacteria	1224	Proteobacteria	2	Bacteria	131567	cellular organisms
396	NZ_JACCBP010000001.1[4097931..4113081]	Pigmentiphaga litoralis	516702	nuclear transport factor 2 family protein_1	nuclear transport factor 2 family protein	nuclear transport factor 2 family protein	WP_179582665.1	396#WP_179582665.1#NZ_JACCBP010000001.1[4097931..4113081]	50	1	471	MADFSSERLSTLNAEYVRCIDNDAVEQWPDFFVERCLYVVNTADNYAQGMQAGVIYADSRAMLHDRVSALRDANIYEQHRYRHIVGTPLVLERAEEGVQAETPFVVVRIMRDGQTDVFASGRYVDHIVDEAGALKFAQRIAVCDSNNIDTLLAIPL	0	9248	9719	10	tph_a3	1	5'H	plot	516702	Pigmentiphaga litoralis	TRUE	NA	NA	516702	Pigmentiphaga litoralis	152267	Pigmentiphaga	506	Alcaligenaceae	80840	Burkholderiales	28216	Betaproteobacteria	1224	Proteobacteria	2	Bacteria	131567	cellular organisms
397	NZ_JACCBP010000001.1[4097931..4113081]	Pigmentiphaga litoralis	516702	4-hydroxythreonine-4-phosphate dehydrogenase PdxA_1	4-hydroxythreonine-4-phosphate dehydrogenase PdxA	4-hydroxythreonine-4-phosphate dehydrogenase PdxA	WP_179582663.1	397#WP_179582663.1#NZ_JACCBP010000001.1[4097931..4113081]	52	1	945	MTAGARKRIAIALGDANGIGPEIAVKAALALRDEPVDVVLVGDAYVLQAQLDRMGEGADAVTIADVPALPRDAFLPGQVRAEAGAATVAYVRAAVEMAQRGEVDAVVGCPHSETSIHQAGISFSGYPGLIAELTGTASDQVFLLLVCPELKIGHVTLHEPLTTALARLTPDLVVDAAVAVADAMGALGIRNPRIGVFGINPHAGEDGLFGTEDETITKPAVARLRERGLQVDGPIGADLLLSQRKHDVYLAMYHDQGHIPVKLLSPLQSSALSVGGGVFFSSVGHGCAFDIAGRGVADATATIRTVRSLAGLRG	0	9715	10660	11	tph_b	1	5'H	plot	516702	Pigmentiphaga litoralis	TRUE	NA	NA	516702	Pigmentiphaga litoralis	152267	Pigmentiphaga	506	Alcaligenaceae	80840	Burkholderiales	28216	Betaproteobacteria	1224	Proteobacteria	2	Bacteria	131567	cellular organisms
398	NZ_JACCBP010000001.1[4097931..4113081]	Pigmentiphaga litoralis	516702	2Fe-2S iron-sulfur cluster binding domain-containing protein_1	2Fe-2S iron-sulfur cluster binding domain-containing protein	2Fe-2S iron-sulfur cluster binding domain-containing protein	WP_179582661.1	398#WP_179582661.1#NZ_JACCBP010000001.1[4097931..4113081]	39	1	1032	MAHTIQIADHGIAFAADPSRSVLDNALAAGYEIPYSCRSGICGSCRGKVIAGDVRGGSGVGVLGDDERREGHVLLCQAQACSDLTLAVRDIEKRNPDATRSIKAKVHKLTQAAPDVTIVHLRFPAGTKVRFKAGQYLHARLEDGTVRHYSMANPPQQNDGVELHIRHVAGGRFTAHLAGEMQVGHTLDVTLPFGDFTVRDATGKPMILLASGTGFAPVKAMVEDAIKRKATRPMTLYWGARKAPDVYLADLPAKWAQKHSWFTFVPVLSEGDGVPGHRTGFVHQAVLDDHASLAGHEVYACGSPAMIQAARQAFVDERGLPRDAFFCDAFVPAVMPDEVFTPA	0	10695	11727	12	tph_a1	1	5'H	plot	516702	Pigmentiphaga litoralis	TRUE	NA	NA	516702	Pigmentiphaga litoralis	152267	Pigmentiphaga	506	Alcaligenaceae	80840	Burkholderiales	28216	Betaproteobacteria	1224	Proteobacteria	2	Bacteria	131567	cellular organisms
399	NZ_JACCBP010000001.1[4097931..4113081]	Pigmentiphaga litoralis	516702	RNA polymerase subunit sigma-70_-1	RNA polymerase subunit sigma-70	RNA polymerase subunit sigma-70	WP_179582659.1	399#WP_179582659.1#NZ_JACCBP010000001.1[4097931..4113081]	NA	-1	1308	MSAHPPLTQNINRLSRLELPGAGQVTVQGHHAYVGHIPNKAGLGTSILDVSDPRNPRIVSQIMLDDPESHTHKARVVGDIMIVNNERNMTLIGRKADELPGLRIKLRDRLGRDATHAELADALNVREVDIPAVEAAEKQPYDRGGFKIYDVSDKTRPRLLCHQKTGGIGVHRFDMDENYAYISTEMAGYIGNILVIYDIRNPSTPQEVSRWWIPGQHLAGGETPTWNGRRTRLHHALRYGDELWAGLWHGGVGIIDIRDITKPTTLGMYNYHPPFPEPSHTFMPLEKPIGGRRIALAIDEEDHAHDAEELDRRKGRPHGCLWVMDVTDPANIKALSSYEVSELDSPWSRATPGRFGAHQFQEQRRGTMVYCAWFAGGLRVVDVADPMSPREVGYFIPDP…	0	11756	13064	13	NA	1	5'H	no_plot	516702	Pigmentiphaga litoralis	TRUE	NA	NA	516702	Pigmentiphaga litoralis	152267	Pigmentiphaga	506	Alcaligenaceae	80840	Burkholderiales	28216	Betaproteobacteria	1224	Proteobacteria	2	Bacteria	131567	cellular organisms
400	NZ_JACCBP010000001.1[4097931..4113081]	Pigmentiphaga litoralis	516702	amidohydrolase family protein_-1	amidohydrolase family protein	amidohydrolase family protein	WP_179582657.1	400#WP_179582657.1#NZ_JACCBP010000001.1[4097931..4113081]	NA	-1	924	MSNQAPSSDPTRQGAPLCAAPDPSPRPPAFAVPAGSCDCHAHICGPGDRHAYSPDRIYTPPDALLPTYRSMLSVLGMTRAVLVQPSVYGSDNAVLMAALQEGGEAFRGVAVIDDAMEADALQAMHAAGVRGVRVNIVDRKTGKGELPMDDVRALADRIAPLGWHLELLMHVDAFPDLATSLGNLPVQLVFGHLGYMAPGAKVETPAFQGLLDLMSRGRAWVKLTGPYRISAGAMPHADIQPLADDLLKAAPDRVVWGSDWPHVMVKRDMPNDGDLLDLLHAWAPDAALRRRVLVDNPARLYDFPPLP	0	13115	14039	14	NA	1	5'H	no_plot	516702	Pigmentiphaga litoralis	TRUE	NA	NA	516702	Pigmentiphaga litoralis	152267	Pigmentiphaga	506	Alcaligenaceae	80840	Burkholderiales	28216	Betaproteobacteria	1224	Proteobacteria	2	Bacteria	131567	cellular organisms
401	NZ_JACCBP010000001.1[4097931..4113081]	Pigmentiphaga litoralis	516702	tripartite tricarboxylate transporter substrate binding protein_-1	tripartite tricarboxylate transporter substrate binding protein	tripartite tricarboxylate transporter substrate binding protein	WP_179582655.1	401#WP_179582655.1#NZ_JACCBP010000001.1[4097931..4113081]	NA	-1	978	MVMQRLMAAIAAVLFIVAPAAAQTDKVWPDKPINLVVGFTPGGPSDVLARLVGKKMGDALGQTVVVVSRPGAGGNIAAAAVAKSAPDGYTWLFGNNSILSTNAALYKTLPFDPDKDFDAVGLVAVQPSILVVNSNVPARSVQELVALIKAKPGELNYASSGAGAAAHLVGQWFKTSAGLTLEHVPYKGAQPALTDLIAGQVQMMFATSASALPYINQGRLRALAVTGPKRMDELPQVPTMVEAGMPQFVAESWHGIVVPAGTPPAIIQRMNQVMVSALNSPEVRAQFRELGVDAAPGTPEAFASFIRSETPKWTRLVQDSGAFVE	0	14160	15138	15	NA	1	5'H	no_plot	516702	Pigmentiphaga litoralis	TRUE	NA	NA	516702	Pigmentiphaga litoralis	152267	Pigmentiphaga	506	Alcaligenaceae	80840	Burkholderiales	28216	Betaproteobacteria	1224	Proteobacteria	2	Bacteria	131567	cellular organisms
402	NZ_JACCDB010000010.1[78781..93806]	Tepidicella baoligensis	2707016	zinc-binding dehydrogenase_1	zinc-binding dehydrogenase	zinc-binding dehydrogenase	WP_180684052.1	402#WP_180684052.1#NZ_JACCDB010000010.1[78781..93806]	NA	1	201	MQAWLCENPVGVDALTWKELPTPQPGPQDVLIEIHAASLNFPDLLIVQNKYQIKPPLPFVPGAEYAGVVQAVGSEVTHLKPGQPVACLSGTGGFGTHTLAPAALCMPLPPGFDLVDAAAFIMTYATSYHALIDRAALKAGETVLVLGGAGGVGTAAIQIARQAGAHVIAAASNDEKCALCREVGAHATINYSEHTPAGTLREAIKQATGGKGPDVIYDPVGGDFAEPAFRSIAWRGRYLVIGFASGPIPSLPLNLPLLKGASIVGVFWGDFAKREPQANAAMMQTLAQWYLQGKIKPVIDRTLPMNELPQAYALMGSRQVKGKLVLVNSR	1	0	201	1	NA	1	5'H	no_plot	2707016	Tepidicella baoligensis	TRUE	NA	NA	2707016	Tepidicella baoligensis	360239	Tepidicella	224471	Burkholderiales genera incertae sedis	80840	Burkholderiales	28216	Betaproteobacteria	1224	Proteobacteria	2	Bacteria	131567	cellular organisms
403	NZ_JACCDB010000010.1[78781..93806]	Tepidicella baoligensis	2707016	sodium:solute symporter_1	sodium:solute symporter	sodium:solute symporter	WP_180684053.1	403#WP_180684053.1#NZ_JACCDB010000010.1[78781..93806]	NA	1	1368	MAYATLAALGAALLLFVWVGLRARTPHADLDQYLTARNSQGATTLGLSFLASGMGAWILFAPPEVGAFVGPVAVAGYAAGAALPFLLLAWCGPAIRRRLPQGRSISEYAQARFGTGLRHWVSAMSVLYMLCFITAELTAIGAITAMLSDIPGSWTVVGVAITTLIYTAWGGLRASLATDRWQAWLLVGLLVIVAGVAVPSLPAGAFEHPLPAAPIGVSLSVALTLVIAVTAANLFHQGYWQRVWAAESDQALHHGAWLGGVATVLVVIVVGGLGILAAASGKNLGQPPIPFFALLADAPGWLALPALLLALALVASSVDTLQNGIASLVVTSRRGFSLTAARWVTVILMVPVVLVALQGLSVLRLFLIADLLCATAVVPVLQGLWNRMTPAAAVAGCVA…	0	322	1690	2	NA	1	5'H	no_plot	2707016	Tepidicella baoligensis	TRUE	NA	NA	2707016	Tepidicella baoligensis	360239	Tepidicella	224471	Burkholderiales genera incertae sedis	80840	Burkholderiales	28216	Betaproteobacteria	1224	Proteobacteria	2	Bacteria	131567	cellular organisms
404	NZ_JACCDB010000010.1[78781..93806]	Tepidicella baoligensis	2707016	glutamine synthetase_-1	glutamine synthetase	glutamine synthetase	WP_180684054.1	404#WP_180684054.1#NZ_JACCDB010000010.1[78781..93806]	NA	-1	1359	MTQASATHDPAYIQQWMDEHRITEVECLIPDMAGQARGKIVPRHKYNPAVGLRLPEAVLTMTVTGDYPEKDFTSVADGDMVLTPDATTLRPVPWAKEPTAQIIHDCYRFDGTETPLSPRGVLRRMIRLYEAEGWKPIIAPEMEFYLVQIEPDEDIPLKPPVGRTRRTEAGMQSFSIDSVNEYDDIFDVMYDWCEAQGIQLDTLIHEMGTAQMEINLDHGDPLPLADQVFLFKRTVREVAIRHNMYATFMAKPMQGQPGSAMHIHQSVLSTATGQNLFSRPDGEASDEFFHFIGGLQTYLPAATAVFAPYVNSYRRLSRFTSAPINLSWGYDNRTCGLRVPHSGPEARRVENRLAGVDVNPYLAIAVSLACGYLGMKQRIRPSEPTTGSAYEQPHQLPRH…	0	1712	3071	3	NA	1	5'H	no_plot	2707016	Tepidicella baoligensis	TRUE	NA	NA	2707016	Tepidicella baoligensis	360239	Tepidicella	224471	Burkholderiales genera incertae sedis	80840	Burkholderiales	28216	Betaproteobacteria	1224	Proteobacteria	2	Bacteria	131567	cellular organisms
405	NZ_JACCDB010000010.1[78781..93806]	Tepidicella baoligensis	2707016	hypothetical protein_1	hypothetical protein	hypothetical protein	WP_180684055.1	405#WP_180684055.1#NZ_JACCDB010000010.1[78781..93806]	NA	1	264	MRHMPTLRQRSRKEATAPMRLLNHLMFATLALFMIQQQLVVPGPAMSSGPWVAQALHFQPRTPPPTLDPEQLSMEDVDWLGDRQRHR	0	3256	3520	4	NA	1	5'H	no_plot	2707016	Tepidicella baoligensis	TRUE	NA	NA	2707016	Tepidicella baoligensis	360239	Tepidicella	224471	Burkholderiales genera incertae sedis	80840	Burkholderiales	28216	Betaproteobacteria	1224	Proteobacteria	2	Bacteria	131567	cellular organisms
406	NZ_JACCDB010000010.1[78781..93806]	Tepidicella baoligensis	2707016	SurA N-terminal domain-containing protein_-1	SurA N-terminal domain-containing protein	SurA N-terminal domain-containing protein	WP_180684056.1	406#WP_180684056.1#NZ_JACCDB010000010.1[78781..93806]	NA	-1	1914	MFDFFRNNIKFLMGFLMLLIIPAFVLFGVEGYSNLREGRDVVAKVGRIEITRQEWDFAHRQEVDRLVASMPGIDRSLLDNEASRFDTLERLINERLLALASAEGLYLTTDQRLARELTQDPSIAALRRPDGSLDVDRYQQLLRAQGMTAEMFEANVRADLARRQVIDGLTQSAFLTPAVADQALRAFFERREVQVAHFRPQDFRAAIEVSDADLQAFYEQNPQLFQSPEQVDVEYLVLDLDAVSARIQLSESDLRAYHEQNIANLALQEQRRARHILLTVEPGADAETKAAVRREAQALLAELRAHPDRFAELARTRSQDPGSAAQGGDLDFFARGAMVKPFEDVVFALERHAISDVVETEFGFHIIQVTDIRRPQPESFEAARPRLERELRQQQAQRR…	0	3904	5818	5	NA	1	5'H	no_plot	2707016	Tepidicella baoligensis	TRUE	NA	NA	2707016	Tepidicella baoligensis	360239	Tepidicella	224471	Burkholderiales genera incertae sedis	80840	Burkholderiales	28216	Betaproteobacteria	1224	Proteobacteria	2	Bacteria	131567	cellular organisms
407	NZ_JACCDB010000010.1[78781..93806]	Tepidicella baoligensis	2707016	helix-turn-helix domain-containing protein_-1	helix-turn-helix domain-containing protein	helix-turn-helix domain-containing protein	WP_180684057.1	407#WP_180684057.1#NZ_JACCDB010000010.1[78781..93806]	64	-1	783	MSHERDRDSVVSLRKGLQVLTSFSRQYPRLTITDVARLTGLSAASARRSLLTLYDLGYLHGDGKFFWMSPKTLLVANAFIASRPLPAIAQPLLDALSERTRESASLGQLLDHDAIIVARSTARRSLSIGLGIGSRLPGYCSAIGRVLLSSLPMAEAEAKLLSMDRRALTRNTITDLTQIMDLLERCREVGWAESDEEIEMGVRSMAVPVRDRSGNVVAAMSIAVRAERMSMAEFQRSFIGQLTRAQKTLEASLFPVSAEK	0	6147	6930	6	tph_r	1	5'H	plot	2707016	Tepidicella baoligensis	TRUE	NA	NA	2707016	Tepidicella baoligensis	360239	Tepidicella	224471	Burkholderiales genera incertae sedis	80840	Burkholderiales	28216	Betaproteobacteria	1224	Proteobacteria	2	Bacteria	131567	cellular organisms
408	NZ_JACCDB010000010.1[78781..93806]	Tepidicella baoligensis	2707016	tripartite tricarboxylate transporter substrate binding protein_1	tripartite tricarboxylate transporter substrate binding protein	tripartite tricarboxylate transporter substrate binding protein	WP_180684058.1	408#WP_180684058.1#NZ_JACCDB010000010.1[78781..93806]	67	1	972	MNPTSIRRRTVIQGAALTLMGGSVWAQSGNTLRFIVPFPAGGTADILPRIVAEKIRAHYAGGVVVDNRPGAGGNIGAERVFRSEPDGLTVLASPPGPIAVNHHLYSKLSFDPTQWVPVTVLATAPNILGVSNKLPVKNLQELIAYLKANPGKVSVASQGNGSTSHLTAALFMQLTGTEMIHIPYRGTAPALVDLIAGNVDVFFDNISSSAPHHNSNSIRIFAVAGEKRSKILPDIPTFAEQGLPNMQAVTFFSVVAPPGTPAAAAARLQSQIAEALSSPEVRQRFEEQGTEPAGWSPERTGQFIRAESEKWKKVIQTAKVTLE	0	7041	8013	7	tph_c	1	5'H	plot	2707016	Tepidicella baoligensis	TRUE	NA	NA	2707016	Tepidicella baoligensis	360239	Tepidicella	224471	Burkholderiales genera incertae sedis	80840	Burkholderiales	28216	Betaproteobacteria	1224	Proteobacteria	2	Bacteria	131567	cellular organisms
409	NZ_JACCDB010000010.1[78781..93806]	Tepidicella baoligensis	2707016	Rieske 2Fe-2S domain-containing protein_1	Rieske 2Fe-2S domain-containing protein	Rieske 2Fe-2S domain-containing protein	WP_180684059.1	409#WP_180684059.1#NZ_JACCDB010000010.1[78781..93806]	79	1	1239	MQTQTIQWKRRDNTRIPYAIYGDSLTHQQEQERIFRGAVWNYLCLEVELPETGSYRTTFVGETPVVVVRGEDEEIYAFENRCAHRGALIALEKSGKVESFQCVYHAWSYNLQGELTGVAFEQGVKGQGGMPPTFCKEEHSPRRLRTTTFCGLVFGSFSDDVPDIEEYLGEEIAARIERVLHKPVEVIGRFTQALPNNWKLYFENVKDSYHASLLHTFFTTFEINRLSQKGGVIVDSSGGHHVSYSMIDPAAKDDSYKEQALRSDNERYRLKDPSLLSGFHEYDDGITLQILSVFPGLVVQQIQNCIAIRQLLPKGIEKSELNWTYLGYADDTPEQRKIRLKQLNLVGPAGFISMEDGAVGGFVQRGIAGASDLDAVVEMGGDAVGSSEGRATETSIRGF…	0	8021	9260	8	tph_a2	1	5'H	plot	2707016	Tepidicella baoligensis	TRUE	NA	NA	2707016	Tepidicella baoligensis	360239	Tepidicella	224471	Burkholderiales genera incertae sedis	80840	Burkholderiales	28216	Betaproteobacteria	1224	Proteobacteria	2	Bacteria	131567	cellular organisms
410	NZ_JACCDB010000010.1[78781..93806]	Tepidicella baoligensis	2707016	nuclear transport factor 2 family protein_1	nuclear transport factor 2 family protein	nuclear transport factor 2 family protein	WP_180684060.1	410#WP_180684060.1#NZ_JACCDB010000010.1[78781..93806]	66	1	465	MIDLLQIAVFNAAYADAIDSDDLERWPSFFTAECNYRVTSIENYRAGLAAGLVWADTRDMLTDRVSALREANIYERHTYRHLIGIPLITEASDSTAQARTPFMVARIMHTGETDVFATGVYLDRFIRQDGQLLLSERIAVCDSSVVDTLLALPL	0	9252	9717	9	tph_a3	1	5'H	plot	2707016	Tepidicella baoligensis	TRUE	NA	NA	2707016	Tepidicella baoligensis	360239	Tepidicella	224471	Burkholderiales genera incertae sedis	80840	Burkholderiales	28216	Betaproteobacteria	1224	Proteobacteria	2	Bacteria	131567	cellular organisms
411	NZ_JACCDB010000010.1[78781..93806]	Tepidicella baoligensis	2707016	4-hydroxythreonine-4-phosphate dehydrogenase PdxA_1	4-hydroxythreonine-4-phosphate dehydrogenase PdxA	4-hydroxythreonine-4-phosphate dehydrogenase PdxA	WP_180684061.1	411#WP_180684061.1#NZ_JACCDB010000010.1[78781..93806]	62	1	879	MSALPEPQRSNITLFGPAQALEHAANICGLQDLLGKVSHVEAGTLPGKIKPGVIDADAGLSTVESATAAIHACRQGMFDAVVACPHHETAIHKAGIPFSGYPSLVARVCNVSEDEVFMMLVGGGLRIVHTTLHESIQNALNRITPELVIKATQAGIRGCQRLGIETPSVALFGINPHASEGTLFGTEDENITVPAAKTLREYGLHIDGPMGADVALADRRHDLYVAIFHDQGHIPVKLLSPKAASALSIGADVLLSSVGHGSAMDIAGKGIAEPTAVLRTVALLMGNQTIFT	0	9794	10673	10	tph_b	1	5'H	plot	2707016	Tepidicella baoligensis	TRUE	NA	NA	2707016	Tepidicella baoligensis	360239	Tepidicella	224471	Burkholderiales genera incertae sedis	80840	Burkholderiales	28216	Betaproteobacteria	1224	Proteobacteria	2	Bacteria	131567	cellular organisms
412	NZ_JACCDB010000010.1[78781..93806]	Tepidicella baoligensis	2707016	2Fe-2S iron-sulfur cluster binding domain-containing protein_1	2Fe-2S iron-sulfur cluster binding domain-containing protein	2Fe-2S iron-sulfur cluster binding domain-containing protein	WP_180684062.1	412#WP_180684062.1#NZ_JACCDB010000010.1[78781..93806]	55	1	1014	MSFQIKLQGTDISFVCQPGQTILDAALKSGISLPYSCRKGICGNCAGSVTEGNIQPHGSLPFRHDNCAEGQVLFCGCEPSTDLVIQPTSWKRSEDGAPKTFTARVYRNELAAPDVSVLQLRLPAGKKIKFRAGQYLLIRMEDGSSRSYSMANAPHESDGVTLHIRHVPGGYFSSRVSTLKPGDTLDIELPYGHVDLDEQDNRPVVFVAGGTGFAPVKSILDGLLKKKAQRQLALIWGARDPSGLYMQSAVEKWQKFWPDFQFVPAVNTVPTTSHGNSYFVGRADEALACRFNDLNNHIIYICGSPGMVEAVRQTALSCGASPKDIHTDSFVEGPASQ	0	10669	11683	11	tph_a1	1	5'H	plot	2707016	Tepidicella baoligensis	TRUE	NA	NA	2707016	Tepidicella baoligensis	360239	Tepidicella	224471	Burkholderiales genera incertae sedis	80840	Burkholderiales	28216	Betaproteobacteria	1224	Proteobacteria	2	Bacteria	131567	cellular organisms
413	NZ_JACCDB010000010.1[78781..93806]	Tepidicella baoligensis	2707016	HU family DNA-binding protein_-1	HU family DNA-binding protein	HU family DNA-binding protein	WP_180684063.1	413#WP_180684063.1#NZ_JACCDB010000010.1[78781..93806]	NA	-1	273	MNKAELIEHIASSADLSKAAAARALNATIQAIGTTLKKGGTVSLVGFGSFSVTKRAARTGRNPRTGAAIKIKAAKIPKFRPGKALKDAIK	0	11865	12138	12	NA	1	5'H	no_plot	2707016	Tepidicella baoligensis	TRUE	NA	NA	2707016	Tepidicella baoligensis	360239	Tepidicella	224471	Burkholderiales genera incertae sedis	80840	Burkholderiales	28216	Betaproteobacteria	1224	Proteobacteria	2	Bacteria	131567	cellular organisms
414	NZ_JACCDB010000010.1[78781..93806]	Tepidicella baoligensis	2707016	tartrate dehydrogenase_-1	tartrate dehydrogenase	tartrate dehydrogenase	WP_180684064.1	414#WP_180684064.1#NZ_JACCDB010000010.1[78781..93806]	NA	-1	1134	MKTHRIAVIAGDGIGQEVMPEGLRVLEAVASKFDIGLQFDHFDFSSWAYYEKHGQMLPDDWKDQIGGHDAIYFGAVGWPEKIPDHISLWGSLLLFRREFDQYVNLRPARLMPGVIAPVVRRDGSPRQPGEIDMMIVRENTEGEYSSIGGRMYPGTEREIVMQETVMSRHGVDRVLKFAFELAQSRPKKHLTSATKSNGIAITMPYWDERVAEMAKAYPEVFVDKFHIDILTAHFVQRPDHFDVVVASNLFGDILSDLGPACTGTIGIAPSANLNPTRQHPSLFEPVHGSAPDIAGKGIANPIGQIWCGAMMLDFLGHRDAHDAVLRAIEAVLEPGSGGPRTPDLGGRATTGDVGRAVAGMIQATPPVATQRGIHEQG	0	12124	13258	13	NA	1	5'H	no_plot	2707016	Tepidicella baoligensis	TRUE	NA	NA	2707016	Tepidicella baoligensis	360239	Tepidicella	224471	Burkholderiales genera incertae sedis	80840	Burkholderiales	28216	Betaproteobacteria	1224	Proteobacteria	2	Bacteria	131567	cellular organisms
415	NZ_JACCDB010000010.1[78781..93806]	Tepidicella baoligensis	2707016	EamA family transporter_-1	EamA family transporter	EamA family transporter	WP_180684065.1	415#WP_180684065.1#NZ_JACCDB010000010.1[78781..93806]	NA	-1	894	MVGNAGDNSWLRAMPWVFVLIWSTGFIVARYGMPHAPPMTFLAWRYALSILCFLVWIWLAKVAWPKDREQWLHLAVLGVLMHAGYLGGVWAAIKAGMGSGLSALVVGLQPVLTAIWLSATGSAVTQRQWMGLTLGFTGLVLVVSNKFVAGSEGDTATWLNLSFAVLALFSITVGTLYQKRFVKPCDVRSANTVQLMAAFAATLPLALLETEGMNWNGELMGAMAWSVLGLTLGGSSLLYMLIQRGAAASVSSLMYLVPPCTALLAWILFSEPITVYTVLGMGLTAVGVSLVIRPPKP	0	13276	14170	14	NA	1	5'H	no_plot	2707016	Tepidicella baoligensis	TRUE	NA	NA	2707016	Tepidicella baoligensis	360239	Tepidicella	224471	Burkholderiales genera incertae sedis	80840	Burkholderiales	28216	Betaproteobacteria	1224	Proteobacteria	2	Bacteria	131567	cellular organisms
416	NZ_JACCDB010000010.1[78781..93806]	Tepidicella baoligensis	2707016	CDP-diacylglycerol--glycerol-3-phosphate 3-phosphatidyltransferase_-1	CDP-diacylglycerol--glycerol-3-phosphate 3-phosphatidyltransferase	CDP-diacylglycerol--glycerol-3-phosphate 3-phosphatidyltransferase	WP_180684066.1	416#WP_180684066.1#NZ_JACCDB010000010.1[78781..93806]	NA	-1	570	MFFNLPTLFTWARIVAIPLIVAVFYWPGLSEPMQNLIATVLFVAFALTDWADGYLARKLNQTSSFGAFLDPVADKFLVCACVLVLVHLDRADVFVALIIIGREIAISALREWMATIGANKSVAVHMVGKLKTTVQMVAIPFLLYDGRVLGLIDTRFWGTLLIWAAAVLTVWSMVYYLQKALPEIRAKAR	0	14184	14754	15	NA	1	5'H	no_plot	2707016	Tepidicella baoligensis	TRUE	NA	NA	2707016	Tepidicella baoligensis	360239	Tepidicella	224471	Burkholderiales genera incertae sedis	80840	Burkholderiales	28216	Betaproteobacteria	1224	Proteobacteria	2	Bacteria	131567	cellular organisms
417	NZ_JACCDB010000010.1[78781..93806]	Tepidicella baoligensis	2707016	excinuclease ABC subunit UvrC_-1	excinuclease ABC subunit UvrC	excinuclease ABC subunit UvrC	WP_180684067.1	417#WP_180684067.1#NZ_JACCDB010000010.1[78781..93806]	NA	-1	251	MTSPHSEDLLKAVASLPSLPGVYRYFDAQGLLLYVGKARDLKRRVSSYFTRSHDGTRIGHMVSKIARLETTVVRSEAEALLLENNLIKTQQPRFNILFRDDKSYPYLKLSASSWAPSHTESTQGSGGSPRPEHYPRVSYYRGAVDKRHRYFGPYPNAWAVKEAIQLIQKVFRLRTCEDTVFNHRTRPCLLYQIKRCSGPCVGRVSPADYAADVRSASAFLRGETQTVLDELERRMLAYAEQLAFEQAAEVRNQIAALSKVLHQQAMESTSDQDVDILAVKVQGGRACVNLAMVRGGRHLGDRPYFPAHVEEGVVIAALDDDKGGVGVSDVAPTEPLAERRSAPPSVEQRVLEAFMAQHYTGVPPPPVLVLGAPVDAHLIELLTEQSGVRLHTVFNPREH…	1	14775	15026	16	NA	1	5'H	no_plot	2707016	Tepidicella baoligensis	TRUE	NA	NA	2707016	Tepidicella baoligensis	360239	Tepidicella	224471	Burkholderiales genera incertae sedis	80840	Burkholderiales	28216	Betaproteobacteria	1224	Proteobacteria	2	Bacteria	131567	cellular organisms
418	NZ_JACCEV010000004.1[93793..109045]	Pusillimonas harenae	657015	CoA transferase_-1	CoA transferase	CoA transferase	WP_130039866.1	418#WP_130039866.1#NZ_JACCEV010000004.1[93793..109045]	NA	-1	357	MSGPLEGVRVIDMTTVLMGPYASQMLGDMGADVIKVESPHGDLVRDLGPMQHDHMGALYLHINRSKRAITLDVKQPEGRAALLRLVEEADVLLYNIRPQSMERLGLSYETVAAVNPKILYVGTFGFGQNGPYAAKPAFDDLIQGAIGLPSLIKMAGSDVPRYVPSNIVDRTVGLFAVSSLCAALYHREKTGRGQRIDIPMFETMVSHLLSDHISGATFDPPLGPPGYARLLAPERRPYKTKDGFVCAVIYNNKQWAAFYKAIGRLEEFSNDARFVNLNTRNRHINDLQQMLAQIFLERTTGEWLSLLEQADIPCMPLHTLESIFEDPHLQKVGLFQWEDHPTEGRMRRVGVPSSWSDSQPAPGRPAPAPGQHTAEVLREVGYSDEQIDHLRAQGIISEH…	1	0	357	1	NA	NA	NA	no_plot	657015	Pusillimonas harenae	TRUE	NA	NA	657015	Pusillimonas harenae	305976	Pusillimonas	506	Alcaligenaceae	80840	Burkholderiales	28216	Betaproteobacteria	1224	Proteobacteria	2	Bacteria	131567	cellular organisms
419	NZ_JACCEV010000004.1[93793..109045]	Pusillimonas harenae	657015	CoA transferase_-1	CoA transferase	CoA transferase	WP_130039867.1	419#WP_130039867.1#NZ_JACCEV010000004.1[93793..109045]	NA	-1	1158	MAGPLAGVKIIDLSSVGMGPYATQILADMGADVIKVESEAGDVVRHGAPSLHPGMGAFYMQVNRNKRSIVLNLKAQDDLEVLRNLLRDADVLVSNIRVQSMHRLGLSYEALQAENPRLIYCGVYGFSEEGPYAGRPAFDDIVQAMSGVAGIQGHGEGREPAYVNTVMADKTTGLTAVYAISMALYEREKSGLGQAIEVPMFETMVSFTLLEHMAGATFAGQDMPMGYERVLSPFRRPYRTQDGYIGVLPYTTEQWRRFFELSGYPQYAQEERFMDPAQRGENIGELYEVLASIVATRSTAEWVELLQSADIPTAPVAALKDLLEDEHLKATGFFKVHEHPTEGPIRMPGVPTRFSRTPGSIRWAAPSLDQDAAAIRAEASTKRKK	0	437	1595	2	NA	NA	NA	no_plot	657015	Pusillimonas harenae	TRUE	NA	NA	657015	Pusillimonas harenae	305976	Pusillimonas	506	Alcaligenaceae	80840	Burkholderiales	28216	Betaproteobacteria	1224	Proteobacteria	2	Bacteria	131567	cellular organisms
420	NZ_JACCEV010000004.1[93793..109045]	Pusillimonas harenae	657015	CoA ester lyase_-1	CoA ester lyase	CoA ester lyase	WP_130039868.1	420#WP_130039868.1#NZ_JACCEV010000004.1[93793..109045]	NA	-1	897	MRSYLFVPADSQRKLQKSLDTAADALIFDLEDAVSLARKEEGRKILADFLAQAQQSDGPAPQLLVRVNALTTGMTLADLAAVMPYRPAGIVLPKCSGAADLNLLGSYLDVFEQLHPAGPDVPPTSIIAIVTETADSLAGLHEYRGATSRLAGMMWGAEDLSGDIGALASKQEEAPEEWTAPFALVRSLCLFAAAAAGVAAIDTVPTEINNPEALLRETRKAYRDGFSAKAAIHPGQVPVINQGMTPDERTVQWARNVAAAFEQNTEVGVATLDGKMLDMPHLRLAKKILSAAEKAGLA	0	1619	2516	3	NA	NA	NA	no_plot	657015	Pusillimonas harenae	TRUE	NA	NA	657015	Pusillimonas harenae	305976	Pusillimonas	506	Alcaligenaceae	80840	Burkholderiales	28216	Betaproteobacteria	1224	Proteobacteria	2	Bacteria	131567	cellular organisms
421	NZ_JACCEV010000004.1[93793..109045]	Pusillimonas harenae	657015	hypothetical protein_1	hypothetical protein	hypothetical protein	WP_130039869.1	421#WP_130039869.1#NZ_JACCEV010000004.1[93793..109045]	NA	1	189	MAKDKTDGSAASNSDKKNTSLRLEKKTLKALKIRAIQEDTSVQKIIETLVQEYINTPLKKPR	0	2704	2893	4	NA	NA	NA	no_plot	657015	Pusillimonas harenae	TRUE	NA	NA	657015	Pusillimonas harenae	305976	Pusillimonas	506	Alcaligenaceae	80840	Burkholderiales	28216	Betaproteobacteria	1224	Proteobacteria	2	Bacteria	131567	cellular organisms
422	NZ_JACCEV010000004.1[93793..109045]	Pusillimonas harenae	657015	CHAD domain-containing protein_1	CHAD domain-containing protein	CHAD domain-containing protein	WP_130039870.1	422#WP_130039870.1#NZ_JACCEV010000004.1[93793..109045]	NA	1	1524	MTTSPIDCYQLPVASISDLINQPVGKLKPLLALESDIAPYTAFDCFDHPLRHSGRLLLKTQDTLELFSESSRPLSQPTDHEICFVSGLAKGPIKQALSNLSSLRRLLPLGTGQRQHAVLTLTDDEEKTHCRAYLLFITAENGRATALAVLQGLKGYNVSLDALRERIIDLGGMLVTGNTLYESLFPLQSIYDAKPEIAISGDTRAFDAANQIISTHIPIARANEHGIIADHDTEFLHDYRIQLRKIRSVISLFQGIYTDAQTAELKARFSAIMAPTGRLRDLDVYLLEKQAYYDLLPKNLHNGLSAFYGMLASQRQTEQAKLASYLCSQPYLQEMKKLAALYVQPQTLAKGPNATLAAHDYASRLIWKRYRKVCKIAAGIDDTTPDADVHALRIQCKKL…	0	2889	4413	5	NA	NA	NA	no_plot	657015	Pusillimonas harenae	TRUE	NA	NA	657015	Pusillimonas harenae	305976	Pusillimonas	506	Alcaligenaceae	80840	Burkholderiales	28216	Betaproteobacteria	1224	Proteobacteria	2	Bacteria	131567	cellular organisms
423	NZ_JACCEV010000004.1[93793..109045]	Pusillimonas harenae	657015	ParA family protein_1	ParA family protein	ParA family protein	WP_130039871.1	423#WP_130039871.1#NZ_JACCEV010000004.1[93793..109045]	NA	1	747	MKIIACYSNKGGVGKTATSVNLAYAMAASGHKTLLCDLDPQGASGFYFRVKPSKRLTNTAFFKDAGKFADAIRGSDYDNLDILPANMSFRDFDVFLSQMHHSHNRLQKSLKSVKEDYDVIVLDCPPTISTLSENVFRSANAIVVPVIPTTLSERTFEQLLAFFKESKLPVQKLHGFFSMVQGVKTLHIETMEAMGDKFRKRFLHTHIPFASDIERMGVYRAPVLATAPNSPAGMAYYELSKEIMKKIN	0	4418	5165	6	NA	NA	NA	no_plot	657015	Pusillimonas harenae	TRUE	NA	NA	657015	Pusillimonas harenae	305976	Pusillimonas	506	Alcaligenaceae	80840	Burkholderiales	28216	Betaproteobacteria	1224	Proteobacteria	2	Bacteria	131567	cellular organisms
424	NZ_JACCEV010000004.1[93793..109045]	Pusillimonas harenae	657015	helix-turn-helix domain-containing protein_-1	helix-turn-helix domain-containing protein	helix-turn-helix domain-containing protein	WP_130040054.1	424#WP_130040054.1#NZ_JACCEV010000004.1[93793..109045]	NA	-1	747	MMSLARGLVVIRAFSAERPNMTVSQISQKTGIPRAAVRRCLYTLDKMGFVASVDGGAFNLRPRVLLLGHGYFASSSLSQAAGPILNRLSGPLDESSSVSVLDGDEILYIARAQTKRLMAMHLDVGSRLPAIYTSMGRVLIASLPYHEQEQYMARAKYIQYTPHSLTDATALAQELEQIRAQGFAVIDQELEAGVRSIALPIMGRDGRPMSAMSVGVHAQRMSIDDMKEKILPALQEAATELTILSKTL	0	5190	5937	7	tph_r	NA	NA	no_plot	657015	Pusillimonas harenae	TRUE	NA	NA	657015	Pusillimonas harenae	305976	Pusillimonas	506	Alcaligenaceae	80840	Burkholderiales	28216	Betaproteobacteria	1224	Proteobacteria	2	Bacteria	131567	cellular organisms
425	NZ_JACCEV010000004.1[93793..109045]	Pusillimonas harenae	657015	3-keto-5-aminohexanoate cleavage protein_1	3-keto-5-aminohexanoate cleavage protein	3-keto-5-aminohexanoate cleavage protein	WP_130039872.1	425#WP_130039872.1#NZ_JACCEV010000004.1[93793..109045]	NA	1	879	MQEKVIITCAITGNLTTPEQHPGLPVTPKQIADSALEASKEGASVAHIHVRDPKTGKPSMETGYYREVMDRIRQSNPDMVINLTTGPGGRFVPSEEDPKVAGPGTTLLRPELRVEHIAELRPEICTLDLNTMNSAGQVVINTPANVRKMARIIKQAGVKPELEIFDSGDLRLACDLIREGELDGPGLFSFVLGVNYGFAANPETMAYARSMLPTGATWSAFGIGRHEFPMVAQAYLYGGHVRVGFEDNIYMAKGVLAESNAQLVGRARCIIESIGGDVASASQARKILGLPS	0	6114	6993	8	NA	NA	NA	no_plot	657015	Pusillimonas harenae	TRUE	NA	NA	657015	Pusillimonas harenae	305976	Pusillimonas	506	Alcaligenaceae	80840	Burkholderiales	28216	Betaproteobacteria	1224	Proteobacteria	2	Bacteria	131567	cellular organisms
426	NZ_JACCEV010000004.1[93793..109045]	Pusillimonas harenae	657015	tripartite tricarboxylate transporter substrate binding protein_1	tripartite tricarboxylate transporter substrate binding protein	tripartite tricarboxylate transporter substrate binding protein	WP_130039873.1	426#WP_130039873.1#NZ_JACCEV010000004.1[93793..109045]	NA	1	984	MKISRTLPFKALLLASTIVGSSASAAATDYPSKPIQMIVPFSAGGTSDFLARTVAEKLGASLDTTVVVDNRPGAGGNIGSAMVARAKPDGYTLLLGTVGTHAINQSVYKEMSFDAVKDFAPISLVAAVPNILVANPALQANSVQELIALAKQKPGQITFASSGNGSSIHLSGEMFKSLTGVDMLHVPYKGSGPAVIDLLGGQVDIMFDNMPSALPHVQAGKLKAFAVTTGERSEAAPELPTIAEEGVKGYEATAWFGILAPAGTPTDIVAKLNAEIVKILDMPDVKKRLAGQGAKAVSNSPEEFASYIKAELKKWENVVKSSGFQPI	0	7040	8024	9	tph_c	NA	NA	no_plot	657015	Pusillimonas harenae	TRUE	NA	NA	657015	Pusillimonas harenae	305976	Pusillimonas	506	Alcaligenaceae	80840	Burkholderiales	28216	Betaproteobacteria	1224	Proteobacteria	2	Bacteria	131567	cellular organisms
427	NZ_JACCEV010000004.1[93793..109045]	Pusillimonas harenae	657015	SDR family oxidoreductase_1	SDR family oxidoreductase	SDR family oxidoreductase	WP_180001944.1	427#WP_180001944.1#NZ_JACCEV010000004.1[93793..109045]	NA	1	702	MSQERVLITGGASGIGAAIAARCRQDGYQPVIIDRIGDGIQADLSDSKETAHALEQALEDGPITRLVNNVGIVVPAHAENQTLDELQLAWSLNVRCAVQCMQALLPGMKAAEFGRIVNMSSRAALGKELRSAYSASKAGLLGMTRVWALELGLHGITANAIGPGPIRTELFDKANPPGDPRTERIIKSVPVKRVGTPDDIAQAASFLMDERSGFTTGQVLYVCGGMTVGVASV	0	8085	8787	10	NA	NA	NA	no_plot	657015	Pusillimonas harenae	TRUE	NA	NA	657015	Pusillimonas harenae	305976	Pusillimonas	506	Alcaligenaceae	80840	Burkholderiales	28216	Betaproteobacteria	1224	Proteobacteria	2	Bacteria	131567	cellular organisms
428	NZ_JACCEV010000004.1[93793..109045]	Pusillimonas harenae	657015	NUDIX domain-containing protein_-1	NUDIX domain-containing protein	NUDIX domain-containing protein	WP_167667406.1	428#WP_167667406.1#NZ_JACCEV010000004.1[93793..109045]	NA	-1	447	MPKERSKHTPPKRGAWAVIYCPATGRFLLGKRSSAVNNSGTWNLFGGRVECDEEPSSALLRELAEEAGWRIKPKHLNKLGRVAGLKKSKRVGDRELYYYLLKVDKQLAPRLNREHSSYGWFKHKRLPGKYNLPTAVAIELGLLKNVSQ	0	8869	9316	11	NA	NA	NA	no_plot	657015	Pusillimonas harenae	TRUE	NA	NA	657015	Pusillimonas harenae	305976	Pusillimonas	506	Alcaligenaceae	80840	Burkholderiales	28216	Betaproteobacteria	1224	Proteobacteria	2	Bacteria	131567	cellular organisms
429	NZ_JACCEV010000004.1[93793..109045]	Pusillimonas harenae	657015	hypothetical protein_1	hypothetical protein	hypothetical protein	WP_130039876.1	429#WP_130039876.1#NZ_JACCEV010000004.1[93793..109045]	NA	1	183	MNNTAKRAMTVMVASMLTLILLGCQKEGPAEKAGKEIDKAISSAGDQIQAAGDKIQSTAK	0	9502	9685	12	NA	NA	NA	no_plot	657015	Pusillimonas harenae	TRUE	NA	NA	657015	Pusillimonas harenae	305976	Pusillimonas	506	Alcaligenaceae	80840	Burkholderiales	28216	Betaproteobacteria	1224	Proteobacteria	2	Bacteria	131567	cellular organisms
430	NZ_JACCEV010000004.1[93793..109045]	Pusillimonas harenae	657015	DUF839 domain-containing protein_1	DUF839 domain-containing protein	DUF839 domain-containing protein	NA	430#NA#NZ_JACCEV010000004.1[93793..109045]	NA	1	NA	NA	NA	9742	9996	13	pseudogene	NA	NA	no_plot	657015	Pusillimonas harenae	TRUE	NA	NA	657015	Pusillimonas harenae	305976	Pusillimonas	506	Alcaligenaceae	80840	Burkholderiales	28216	Betaproteobacteria	1224	Proteobacteria	2	Bacteria	131567	cellular organisms
431	NZ_JACCEV010000004.1[93793..109045]	Pusillimonas harenae	657015	helix-turn-helix domain-containing protein_1	helix-turn-helix domain-containing protein	helix-turn-helix domain-containing protein	WP_130039877.1	431#WP_130039877.1#NZ_JACCEV010000004.1[93793..109045]	NA	1	387	MPKKPNKAKTAPAGNKPKQKLVNGINIQINATKVATLKELRKATQHTQDDLAIALGVGQGTISRIEKRDDMLVSTLQHYIESVGGTMQILATFPNNHALIIEQLSKRAAAQLNQSNVKPPDSNSLPAT	0	10103	10490	14	tph_r	NA	NA	no_plot	657015	Pusillimonas harenae	TRUE	NA	NA	657015	Pusillimonas harenae	305976	Pusillimonas	506	Alcaligenaceae	80840	Burkholderiales	28216	Betaproteobacteria	1224	Proteobacteria	2	Bacteria	131567	cellular organisms
432	NZ_JACCEV010000004.1[93793..109045]	Pusillimonas harenae	657015	carboxynorspermidine decarboxylase_1	carboxynorspermidine decarboxylase	carboxynorspermidine decarboxylase	WP_130039878.1	432#WP_130039878.1#NZ_JACCEV010000004.1[93793..109045]	NA	1	1104	MHTLPTPYYLIDKPALQRNLDTINYIRKHSGAKVLLALKCFATWSVFDLMRQHMDGTTSSSLYEVKLGYQKFGGETHAYSVAFADHEIDEVVANCDKIIFNSINQLKRYASKAQGKPMGLRLNPGISCAGFDLADPARTYSRLGEGDPARILAVADQLDGVMIHNNCENDDLPRFDALLTQIEHTYGDILRRLKWVSLGGGISFTAKDYPVDAFCQRLQRFAQEYDVQVYLEPGEAAVRHSTTLEVSVLDVGFNGKHLAVVDSSTEAHMLDLLIYRETAPLGDGTGEHEYMVCGKTCLAGDIFGEGRFAAPLQIGDRISIGDAAGYTMVKKNWFNGVHMPSIAVKEADGSVRVVREFSFDDYVNSLS	0	10503	11607	15	NA	NA	NA	no_plot	657015	Pusillimonas harenae	TRUE	NA	NA	657015	Pusillimonas harenae	305976	Pusillimonas	506	Alcaligenaceae	80840	Burkholderiales	28216	Betaproteobacteria	1224	Proteobacteria	2	Bacteria	131567	cellular organisms
433	NZ_JACCEV010000004.1[93793..109045]	Pusillimonas harenae	657015	saccharopine dehydrogenase family protein_1	saccharopine dehydrogenase family protein	saccharopine dehydrogenase family protein	WP_130039879.1	433#WP_130039879.1#NZ_JACCEV010000004.1[93793..109045]	NA	1	1395	MKRNVLIIGAGGVAHVAAHKCAQNNILLGDIHIASRTLEKCQAIIKSIKEKDSQRSAGRLQAHELDALDIEATKALIRSTNSQIVINVGSPFLNMAVMSACIETGAAYLDTAIHEDPAKVCEAPPWYGNYEWQRRDDCRKAGVTAILGVGFDPGVVNAYGRYAIDTYFDQVESIDIIDINAGSHGRYFATNFDPEINFREFTSTVWSWERGKWKANAMFEHRHEWDMPVVGKNTTYLTGHDELHSMSKNLDVPNIRFWMGFGEHYINVFTVLKNLGLLSEQPVRTAEGLEVVPLKVVKAILPDPASLAPNYTGKTCIGDLVKGKKNGKPQEVLIYNICDHKESFQEVGSQAISYTAGVPVVAAAMLIADGVWDVGHMANVEELDPKPFIDLMNRMGLVT…	0	11647	13042	16	NA	NA	NA	no_plot	657015	Pusillimonas harenae	TRUE	NA	NA	657015	Pusillimonas harenae	305976	Pusillimonas	506	Alcaligenaceae	80840	Burkholderiales	28216	Betaproteobacteria	1224	Proteobacteria	2	Bacteria	131567	cellular organisms
434	NZ_JACCEV010000004.1[93793..109045]	Pusillimonas harenae	657015	cytochrome b_1	cytochrome b	cytochrome b	WP_130039880.1	434#WP_130039880.1#NZ_JACCEV010000004.1[93793..109045]	NA	1	537	MEHRYTRTAIFLHWLVAAGLIGTFTVGFFMQDLPLSPTKLKVYSWHKWAGVTLLLLVATRLCWRLTHAAPPLPTNMSPTARFTAHAAHWLLYALMLAIPLSGWTMSSAVGFPVVWFGVIQLPDLVPKDKALGAALKQAHQVLNYTLLVMVIAHLAAALKHHFIDRDTVLSRMLPYRKK	0	13096	13633	17	NA	NA	NA	no_plot	657015	Pusillimonas harenae	TRUE	NA	NA	657015	Pusillimonas harenae	305976	Pusillimonas	506	Alcaligenaceae	80840	Burkholderiales	28216	Betaproteobacteria	1224	Proteobacteria	2	Bacteria	131567	cellular organisms
435	NZ_JACCEV010000004.1[93793..109045]	Pusillimonas harenae	657015	NtaA/DmoA family FMN-dependent monooxygenase_-1	NtaA/DmoA family FMN-dependent monooxygenase	NtaA/DmoA family FMN-dependent monooxygenase	WP_180001946.1	435#WP_180001946.1#NZ_JACCEV010000004.1[93793..109045]	NA	-1	1293	MMHINLFIFGCGHHRAAWRHPGSAVESLGDIAYYEQLAQIAERGKLDAIFFADGHSTDNLTDGPRWFLEPLTMLSAISRATRHIGLISTVSSTFYTPFHAARMVASLDHISNGRMGWNVVTSMFDTEARNHGFDTMPGHDWRYARAEEFVDVALSLWDSWQDGAPQMDRQGAYVKPESIHSIDHKGEHFRIDGPLTVPRPPQGHPVLFQAGASEQGRDLAARRAEAIYAVAYDLAAAQEYYRDIKRRVKAAGRHDFVPIMPGLVTYVGSTQAEARARQRELDELLPAQDALRQLGMYVGCDCTGWELDAPVPSLPALEAFKGPKGRYATVLRIINTEKPTVRQLLGRLAAGGGHCTMVGTPEQIADEMERWFLNEGADGFNLMPPTLPGGIDDFVEQVV…	0	13647	14940	18	NA	NA	NA	no_plot	657015	Pusillimonas harenae	TRUE	NA	NA	657015	Pusillimonas harenae	305976	Pusillimonas	506	Alcaligenaceae	80840	Burkholderiales	28216	Betaproteobacteria	1224	Proteobacteria	2	Bacteria	131567	cellular organisms
436	NZ_JACCEV010000004.1[93793..109045]	Pusillimonas harenae	657015	3-oxoacyl-ACP reductase_-1	3-oxoacyl-ACP reductase	3-oxoacyl-ACP reductase	WP_130039882.1	436#WP_130039882.1#NZ_JACCEV010000004.1[93793..109045]	NA	-1	292	MSQHFAALPIHKQIVLVTGAGRGLGQHIARAFLAEGARVVVNYLTSADSARALAADNENRAIALQADVTDAGAVQAMLEQACRHFAAPVTTIVNNALPAFSFNGDARPHADVLAWSHLHQQFEGVVRGALNTTQAALPGMRSAGFGRIINVGTNLFQNPVVPYHDYTAAKAALLSLTRTLSHDLGPDGITVNMVSGGLLRTTDASAATPEAVFDLIASSTPLRRVTTPAEFADATLFFASPWSRSVTGQNLVVDGGLVKN	1	14961	15253	19	NA	NA	NA	no_plot	657015	Pusillimonas harenae	TRUE	NA	NA	657015	Pusillimonas harenae	305976	Pusillimonas	506	Alcaligenaceae	80840	Burkholderiales	28216	Betaproteobacteria	1224	Proteobacteria	2	Bacteria	131567	cellular organisms
437	NZ_JONP01000002.1[134857..150040]	Roseomonas aerilata DSM 19363	1123060	amino acid synthesis family protein_1	amino acid synthesis family protein	amino acid synthesis family protein	WP_043830096.1	437#WP_043830096.1#NZ_JONP01000002.1[134857..150040]	NA	1	144	MPLDVRRWSTLVEEKAVEAGQRSEVPLRKVAALAIVANPHAGRYEPDLSGVIADSEAVGALLAKLALEAMGGLPVESYGKGGVVGLGGEQEHANAMLTTTFAEPLRVAVGGALSWIPSFTKVAAPGGIIDVPLAHKDALYVRSHYDGVTVALPPDAPAPDEVALIVVLANRGRLNARVGGLKAGEISARDGLR	1	0	144	1	NA	NA	NA	no_plot	1123060	Roseomonas aerilata DSM 19363	TRUE	1123060	Roseomonas aerilata DSM 19363	452982	Roseomonas aerilata	125216	Roseomonas	433	Acetobacteraceae	204441	Rhodospirillales	28211	Alphaproteobacteria	1224	Proteobacteria	2	Bacteria	131567	cellular organisms
438	NZ_JONP01000002.1[134857..150040]	Roseomonas aerilata DSM 19363	1123060	amidohydrolase family protein_1	amidohydrolase family protein	amidohydrolase family protein	WP_043830098.1	438#WP_043830098.1#NZ_JONP01000002.1[134857..150040]	NA	1	1197	MRVAVVNLGQIVTGDLASPFAAGDSILLEAGRIAALGTLTAEQVSGADVVVDAAGTVAIPGLIDSHVHITFGDYTPRQKVVGYLESYLHGGTTTAITASEVHVPGRPKDPAGVKALALAAQACFRDYRPGGMRVHAGSVILEPGLTEADLAELKAAGIWLAKAGFGAFATPYDYAPLMRAARRLGMVTTMHTGGSSIPGSSGIWAEHVLAADATVSFHVNGGPVAMPEEGFERLVKESSVAMQICTAGNLRTALKTARLLDEARQPERLLIATDTPTGSGIMPLGIFYTITHLASLGGMAPERAIAAATGNNARVYGLNSGFLAPGRDADLVLIDACAGGAHDEALTAIAHGDVPAVAAVFTDGVPRFVGRSRNTPASIRNVRVAECRLPMDFSGSAH	0	145	1342	2	NA	NA	NA	no_plot	1123060	Roseomonas aerilata DSM 19363	TRUE	1123060	Roseomonas aerilata DSM 19363	452982	Roseomonas aerilata	125216	Roseomonas	433	Acetobacteraceae	204441	Rhodospirillales	28211	Alphaproteobacteria	1224	Proteobacteria	2	Bacteria	131567	cellular organisms
439	NZ_JONP01000002.1[134857..150040]	Roseomonas aerilata DSM 19363	1123060	FAD-dependent monooxygenase_1	FAD-dependent monooxygenase	FAD-dependent monooxygenase	WP_043830100.1	439#WP_043830100.1#NZ_JONP01000002.1[134857..150040]	NA	1	1215	MSRFNAAPSVIVAGAGPVGVVTALALADAGFAVTLIEAAADIDRNPRASTTHPSTLAMIERVGLIDRFVREGLIARYFQFWDRPAGQKVAEFDHQILADDTPFPFVVQTEQHKLARMGLDRLATLPNATIRMNTGLTALEQNADGVTVTLPDGERLRADWLVGADGGRSTVRKALDIEFEGYTWPERFIVLTVTDDFEAMLGCCLRNYFADPDEWANLFKVAGDGQGPLWRAVFPTRQDEPDEEALSDEGAERRLQGLHPKPGRYDLVHRNLYKVHQRVAKSFRQGRVFLAGDAGHVNNPIGGLGLNFGIHDAMDLADTLSAHVFGGADAALLDGYERRRRTLNIEFVQQQTIANKKRLEEKDPARRRASLDALAETAADPVKAREFLLRSSLIGSTRQ…	0	1341	2556	3	NA	NA	NA	no_plot	1123060	Roseomonas aerilata DSM 19363	TRUE	1123060	Roseomonas aerilata DSM 19363	452982	Roseomonas aerilata	125216	Roseomonas	433	Acetobacteraceae	204441	Rhodospirillales	28211	Alphaproteobacteria	1224	Proteobacteria	2	Bacteria	131567	cellular organisms
440	NZ_JONP01000002.1[134857..150040]	Roseomonas aerilata DSM 19363	1123060	alpha/beta hydrolase_1	alpha/beta hydrolase	alpha/beta hydrolase	WP_043830102.1	440#WP_043830102.1#NZ_JONP01000002.1[134857..150040]	NA	1	1023	MLRRLAPAALAISLTIAAPPSPARAAEVVAARIAYEEVARPAGLPETFQPAEAATLRFLVITAIDGNRVDAALWEPRNRPPAETTLVVAVHGSGDNFAHAPADALGRGLSAGGRAVLSISTRQHDDRVNTENFFDVRRDIEAAVMTARSLGYGRLVLSGHSLGNIQVQFYAATDWSSDIRGVVLLGPFANLPWKTRNILMQDEPAYRRLNEAARAMLRDGRLAERLPEPMGFYTGQRVPVTAQHFLTYRSDAVSAADGTFWIRRIPKPVLIMRDAADAVIQPFEPHMLLSAANAEGSLTQGARYVLLPNDRPPSLAGHYFPDTADKLVETLGAWLAERQL	0	2585	3608	4	NA	NA	NA	no_plot	1123060	Roseomonas aerilata DSM 19363	TRUE	1123060	Roseomonas aerilata DSM 19363	452982	Roseomonas aerilata	125216	Roseomonas	433	Acetobacteraceae	204441	Rhodospirillales	28211	Alphaproteobacteria	1224	Proteobacteria	2	Bacteria	131567	cellular organisms
441	NZ_JONP01000002.1[134857..150040]	Roseomonas aerilata DSM 19363	1123060	tripartite tricarboxylate transporter substrate binding protein_-1	tripartite tricarboxylate transporter substrate binding protein	tripartite tricarboxylate transporter substrate binding protein	WP_043830104.1	441#WP_043830104.1#NZ_JONP01000002.1[134857..150040]	NA	-1	978	MKWVPALLAACMAAVLVGGAPGARAQEAWPERPIRLVVPFAPGGVTDSIGRISAEWLGSRLGKPVVVENRSGGNGSIAAELVAGSRPDGYTLLVASASQFAVLPALTAVRYDPLRSFAPVSIVASNPFALAVPARLGVANLQEFIALARRENGTLDYASAGNGSGSHLTMALFLRRAGIEMQHVPYRGGGPATQDLLAGRVVAYFGNPSEVVPQMQGGTLRIIATSGRERIPELPDVPTVAEQGVAGLVTETWNGIAAPAGTPPAIVERIAEAMRPACADAAFRASLSRLGVEPVCNTPAEMGARVEADLPVWKEAVQISGATLD	0	3647	4625	5	NA	NA	NA	no_plot	1123060	Roseomonas aerilata DSM 19363	TRUE	1123060	Roseomonas aerilata DSM 19363	452982	Roseomonas aerilata	125216	Roseomonas	433	Acetobacteraceae	204441	Rhodospirillales	28211	Alphaproteobacteria	1224	Proteobacteria	2	Bacteria	131567	cellular organisms
442	NZ_JONP01000002.1[134857..150040]	Roseomonas aerilata DSM 19363	1123060	LysR family transcriptional regulator_-1	LysR family transcriptional regulator	LysR family transcriptional regulator	WP_043830106.1	442#WP_043830106.1#NZ_JONP01000002.1[134857..150040]	NA	-1	921	MSITLRQLRAFVTVAEKGSFTRAARALHMAQPMVSALIRELEAELGFRLFDRTTRRVELTAAAAEFLTDARRMTGDLDRAVRRARDIGARRRGHLSIGAPPLLAATLLPGVIRAFAESAPGVSVTLYDRHIAAIGALLRDGEVQLAVGTFRREEQGLVRVTLIADRLSLLCRADHPLAGRAEPGWAELEGVPLITLRPGNGIRDQVERGYEEAGLRAAPAIELDQIGTVIAMVEAGFGVTVLPPYALGPFAAQSLVLRPLARPSVTREIELVYREERSLSPAAAEFVRLLRIGAARLPAMPGAAAA	0	4783	5704	6	NA	NA	NA	no_plot	1123060	Roseomonas aerilata DSM 19363	TRUE	1123060	Roseomonas aerilata DSM 19363	452982	Roseomonas aerilata	125216	Roseomonas	433	Acetobacteraceae	204441	Rhodospirillales	28211	Alphaproteobacteria	1224	Proteobacteria	2	Bacteria	131567	cellular organisms
443	NZ_JONP01000002.1[134857..150040]	Roseomonas aerilata DSM 19363	1123060	FAD-dependent monooxygenase_1	FAD-dependent monooxygenase	FAD-dependent monooxygenase	WP_052401413.1	443#WP_052401413.1#NZ_JONP01000002.1[134857..150040]	NA	1	1215	MQARKLRAAVVGGGIGGLAAARALMHRGIEVAVFERAEALGEVGAGVFIFPNSLRQMVRMGLGPALDKVGGKVGPASRYCRMDGTVVGRIPTTDSSGWNGMYGMHRADLLNAIAATIPPEAIHTGHRCTGLQQDEQGARLEFANGNTFEADVVIAADGIQSVLQPYVVDPMPPEYSGSRAYRGLIARDKLPNWLDEAHQVWMGDGKHFMVFPVRSGQLLNYVGFVPTEDQTVESWSAIGDRDELAASFADWDAPVVELLSKVESCFWWGLYDRRPLASWTRGRLALLGDAAHPMLPHLGQGANQAIEDGVALAVLLEGRSPEEVPEILPRYEALRRVRTDVIQAEARRNGLRYDSRWGSLEQRDREIANAAKFRRQLYDYDIEAAAIAFRDGKGTTTEL…	0	5894	7109	7	NA	NA	NA	no_plot	1123060	Roseomonas aerilata DSM 19363	TRUE	1123060	Roseomonas aerilata DSM 19363	452982	Roseomonas aerilata	125216	Roseomonas	433	Acetobacteraceae	204441	Rhodospirillales	28211	Alphaproteobacteria	1224	Proteobacteria	2	Bacteria	131567	cellular organisms
444	NZ_JONP01000002.1[134857..150040]	Roseomonas aerilata DSM 19363	1123060	tripartite tricarboxylate transporter substrate binding protein_1	tripartite tricarboxylate transporter substrate binding protein	tripartite tricarboxylate transporter substrate binding protein	WP_043830108.1	444#WP_043830108.1#NZ_JONP01000002.1[134857..150040]	NA	1	975	MKRRELGAGLAALALSAPLARRARAQGNWPAQPVRIVVPFPAGGTADSVPRIVAEGLRALWRQPVIIDNRPGAAGNIGTAHVAGAEPDGYTLLAAPPPPLAINQHLYARLNFDPTGLRPIVIMGTSPNVVEVSTKLEVRNLRELIDLAKAKPGGINAANQGMGTTSHLTAAMFEAAAGVEFNHVPYNGTAPALNDLVAGHVDLFFDNLSSSLSFHQSGATRILAICQAERAPQLPDVPTVSELALPGFSAIAWYAIMAPRGTPDAVIQAVNRDAVSVIQQPEVQKRFVEQAVKPVGNSPEEAAAFITAESRLWGEAVRRTGLRL	0	7155	8130	8	tph_c	NA	NA	no_plot	1123060	Roseomonas aerilata DSM 19363	TRUE	1123060	Roseomonas aerilata DSM 19363	452982	Roseomonas aerilata	125216	Roseomonas	433	Acetobacteraceae	204441	Rhodospirillales	28211	Alphaproteobacteria	1224	Proteobacteria	2	Bacteria	131567	cellular organisms
[truncated: 1,019 more rows]

## Sheet: E_PIM
protein_x	family_x	locus_x	name_for_clustal_o_x	protein_y	family_y	locus_y	name_for_clustal_o_y2	percent_similarity
tph_r	Comamonadaceae	NC_013446.2[1681279..1696668]	34#WP_012837656.1#NC_013446.2[1681279..1696668]	tph_r	Comamonadaceae	NC_013446.2[1681279..1696668]	34#WP_012837656.1#NC_013446.2[1681279..1696668]	100
tph_r	Comamonadaceae	NC_013446.2[1681279..1696668]	34#WP_012837656.1#NC_013446.2[1681279..1696668]	tph_r	Comamonadaceae	NZ_BBXH01000002.1	E6#WP_012837656.1#NZ_BBXH01000002.1	100
[truncated: 1,544 more rows]
